# Supplementary material
Source: publisher figshare collection journal article supplement (https://acs.figshare.com/ndownloader/files/9158764)
Supplement: Supplementary file 1 [file 9158764]

data_NIH16
_audit_creation_date              2016-08-04
_audit_creation_method
;
Olex2 1.2-beta
(compiled 2016.07.26 svn.r3321 for OlexSys, GUI svn.r5206)
;
_publ_contact_author_address      ?
_publ_contact_author_email        ?
_publ_contact_author_name         ''
_publ_contact_author_phone        ?
_publ_section_references
;
Dolomanov, O.V., Bourhis, L.J., Gildea, R.J, Howard, J.A.K. & Puschmann, H.
 (2009), J. Appl. Cryst. 42, 339-341.

Sheldrick, G.M. (2015). Acta Cryst. A71, 3-8.

Sheldrick, G.M. (2015). Acta Cryst. C71, 3-8.
;
_chemical_name_common             ?
_chemical_name_systematic         ?
_chemical_formula_moiety          'C12 H14 Cl N O2'
_chemical_formula_sum             'C12 H14 Cl N O2'
_chemical_formula_weight          239.69
_chemical_absolute_configuration  ad
_chemical_melting_point           ?
loop_
  _atom_type_symbol
  _atom_type_description
  _atom_type_scat_dispersion_real
  _atom_type_scat_dispersion_imag
  _atom_type_scat_source
 'C' 'C' 0.0033 0.0016 'International Tables Vol C Tables 4.2.6.8 and 6.1.1.4'
 'H' 'H' 0.0000 0.0000 'International Tables Vol C Tables 4.2.6.8 and 6.1.1.4'
 'Cl' 'Cl' 0.1484 0.1585 'International Tables Vol C Tables 4.2.6.8 and 6.1.1.4'
 'N' 'N' 0.0061 0.0033 'International Tables Vol C Tables 4.2.6.8 and 6.1.1.4'
 'O' 'O' 0.0106 0.0060 'International Tables Vol C Tables 4.2.6.8 and 6.1.1.4'

_shelx_space_group_comment
;
The symmetry employed for this shelxl refinement is uniquely defined
by the following loop, which should always be used as a source of
symmetry information in preference to the above space-group names.
They are only intended as comments.
;
_space_group_crystal_system       'orthorhombic'
_space_group_IT_number            19
_space_group_name_H-M_alt         'P 21 21 21'
_space_group_name_Hall            'P 2ac 2ab'
loop_
  _space_group_symop_operation_xyz
 'x, y, z'
 '-x+1/2, -y, z+1/2'
 '-x, y+1/2, -z+1/2'
 'x+1/2, -y+1/2, -z'

_cell_length_a                    7.2604(2)
_cell_length_b                    8.2772(2)
_cell_length_c                    18.9206(4)
_cell_angle_alpha                 90
_cell_angle_beta                  90
_cell_angle_gamma                 90
_cell_volume                      1137.05(5)
_cell_formula_units_Z             4
_cell_measurement_reflns_used     7871
_cell_measurement_temperature     100
_cell_measurement_theta_max       26.310
_cell_measurement_theta_min       2.686
_shelx_estimated_absorpt_T_max    0.886
_shelx_estimated_absorpt_T_min    0.878
_exptl_absorpt_coefficient_mu     0.320
_exptl_absorpt_correction_T_max   0.2602
_exptl_absorpt_correction_T_min   0.2236
_exptl_absorpt_correction_type    multi-scan
_exptl_absorpt_process_details
;
SADABS-2014/5 (Bruker,2014/5) was used for absorption correction.
wR2(int) was 0.0548 before and 0.0493 after correction.
The Ratio of minimum to maximum transmission is 0.8593.
The \l/2 correction factor is 0.00150.
;
_exptl_absorpt_special_details    ?
_exptl_crystal_colour             Colorless
_exptl_crystal_colour_primary     Colorless
_exptl_crystal_density_diffrn     1.400
_exptl_crystal_density_meas       ?
_exptl_crystal_density_method     ?
_exptl_crystal_description        Block
_exptl_crystal_F_000              504
_exptl_crystal_preparation        ?
_exptl_crystal_size_max           0.417
_exptl_crystal_size_mid           0.405
_exptl_crystal_size_min           0.386
_exptl_transmission_factor_max    ?
_exptl_transmission_factor_min    ?
_diffrn_reflns_av_R_equivalents   0.0355
_diffrn_reflns_av_unetI/netI      0.0232
_diffrn_reflns_Laue_measured_fraction_full 0.997
_diffrn_reflns_Laue_measured_fraction_max 0.998
_diffrn_reflns_limit_h_max        8
_diffrn_reflns_limit_h_min        -9
_diffrn_reflns_limit_k_max        10
_diffrn_reflns_limit_k_min        -10
_diffrn_reflns_limit_l_max        23
_diffrn_reflns_limit_l_min        -22
_diffrn_reflns_number             14877
_diffrn_reflns_point_group_measured_fraction_full 0.998
_diffrn_reflns_point_group_measured_fraction_max 0.999
_diffrn_reflns_theta_full         25.000
_diffrn_reflns_theta_max          26.374
_diffrn_reflns_theta_min          2.686
_diffrn_ambient_temperature       100
_diffrn_detector                  'Bruker APEX-II CCD'
_diffrn_detector_area_resol_mean  7.9
_diffrn_detector_type             'CCD Area Detector'
_diffrn_measured_fraction_theta_full 0.997
_diffrn_measured_fraction_theta_max 0.998
_diffrn_measurement_device        'Kappa Four-Circle Diffractometer'
_diffrn_measurement_device_type   'Bruker X8 APEX II'
_diffrn_measurement_method        '\w and \f scans'
_diffrn_radiation_monochromator   graphite
_diffrn_radiation_probe           X-ray
_diffrn_radiation_type            MoK\a
_diffrn_radiation_wavelength      0.71073
_diffrn_source                    'sealed tube'
_diffrn_source_type               fine-focus
_diffrn_special_details           ?
_diffrn_standards_number          0
_reflns_Friedel_coverage          0.699
_reflns_Friedel_fraction_full     1.000
_reflns_Friedel_fraction_max      1.000
_reflns_number_gt                 2247
_reflns_number_total              2330
_reflns_special_details
;
 Reflections were merged by SHELXL according to the crystal
 class for the calculation of statistics and refinement.
 
 _reflns_Friedel_fraction is defined as the number of unique
 Friedel pairs measured divided by the number that would be
 possible theoretically, ignoring centric projections and
 systematic absences.
;
_reflns_threshold_expression      'I > 2\s(I)'
_computing_cell_refinement        'SAINT v8.34A (Bruker, 2013)'
_computing_data_collection        'APEX2 v2013.6-2 (Bruker, 2013)'
_computing_data_reduction         'SAINT v8.34A (Bruker, 2013)'
_computing_molecular_graphics     'Olex2 (Dolomanov et al., 2009)'
_computing_publication_material   'Olex2 (Dolomanov et al., 2009)'
_computing_structure_refinement   'ShelXL (Sheldrick, 2015)'
_computing_structure_solution     'ShelXT (Sheldrick, 2015)'
_refine_diff_density_max          0.213
_refine_diff_density_min          -0.180
_refine_diff_density_rms          0.038
_refine_ls_abs_structure_details
;
 Flack x determined using 909 quotients [(I+)-(I-)]/[(I+)+(I-)]
 (Parsons, Flack and Wagner, Acta Cryst. B69 (2013) 249-259).
;
_refine_ls_abs_structure_Flack    0.00(2)
_refine_ls_extinction_coef        .
_refine_ls_extinction_method      none
_refine_ls_goodness_of_fit_ref    1.057
_refine_ls_hydrogen_treatment     mixed
_refine_ls_matrix_type            full
_refine_ls_number_parameters      157
_refine_ls_number_reflns          2330
_refine_ls_number_restraints      3
_refine_ls_R_factor_all           0.0249
_refine_ls_R_factor_gt            0.0234
_refine_ls_restrained_S_all       1.061
_refine_ls_shift/su_max           0.000
_refine_ls_shift/su_mean          0.000
_refine_ls_structure_factor_coef  Fsqd
_refine_ls_weighting_details
'w=1/[\s^2^(Fo^2^)+(0.0266P)^2^+0.2809P] where P=(Fo^2^+2Fc^2^)/3'
_refine_ls_weighting_scheme       calc
_refine_ls_wR_factor_gt           0.0570
_refine_ls_wR_factor_ref          0.0577
_refine_special_details           ?
_olex2_refinement_description
;
1. Fixed Uiso
 At 1.2 times of:
  All C(H) groups, All C(H,H) groups
2. Restrained distances
 N1-H1A = N1-H1B = O2-H2
 0.95 with sigma of 0.02
3.a Ternary CH refined with riding coordinates:
 C2(H2A)
3.b Secondary CH2 refined with riding coordinates:
 C3(H3A,H3B), C4(H4A,H4B), C5(H5A,H5B)
3.c Aromatic/amide H refined with riding coordinates:
 C9(H9), C10(H10), C11(H11), C12(H12)
;
_atom_sites_solution_hydrogens    mixed
_atom_sites_solution_primary      dual
_atom_sites_solution_secondary    difmap
loop_
  _atom_site_label
  _atom_site_type_symbol
  _atom_site_fract_x
  _atom_site_fract_y
  _atom_site_fract_z
  _atom_site_U_iso_or_equiv
  _atom_site_adp_type
  _atom_site_occupancy
  _atom_site_site_symmetry_order
  _atom_site_calc_flag
  _atom_site_refinement_flags_posn
  _atom_site_refinement_flags_adp
  _atom_site_refinement_flags_occupancy
  _atom_site_disorder_assembly
  _atom_site_disorder_group
 Cl1 Cl 0.19502(6) 0.38523(6) 0.65201(2) 0.01916(12) Uani 1 1 d . . . . .
 O1 O 0.18519(19) 0.66613(15) 0.54000(6) 0.0175(3) Uani 1 1 d . . . . .
 O2 O -0.06106(17) 0.89516(18) 0.58132(7) 0.0170(3) Uani 1 1 d D . . . .
 H2 H -0.042(3) 0.893(3) 0.5359(10) 0.037(7) Uiso 1 1 d D . . . .
 N1 N 0.5172(2) 0.8636(2) 0.61075(9) 0.0160(3) Uani 1 1 d D . . . .
 H1A H 0.549(3) 0.859(3) 0.5640(10) 0.026(6) Uiso 1 1 d D . . . .
 H1B H 0.622(3) 0.871(3) 0.6385(12) 0.032(6) Uiso 1 1 d D . . . .
 C1 C 0.2286(2) 0.7461(2) 0.59093(9) 0.0121(4) Uani 1 1 d . . . . .
 C2 C 0.1123(2) 0.8893(3) 0.61539(9) 0.0128(4) Uani 1 1 d . . . . .
 H2A H 0.1807 0.9913 0.6046 0.015 Uiso 1 1 calc R . . . .
 C3 C 0.0809(3) 0.8799(3) 0.69499(9) 0.0188(4) Uani 1 1 d . . . . .
 H3A H 0.0091 0.7815 0.7063 0.023 Uiso 1 1 calc R . . . .
 H3B H 0.0089 0.9749 0.7107 0.023 Uiso 1 1 calc R . . . .
 C4 C 0.2644(3) 0.8754(3) 0.73421(9) 0.0195(4) Uani 1 1 d . . . . .
 H4A H 0.2411 0.8704 0.7857 0.023 Uiso 1 1 calc R . . . .
 H4B H 0.3335 0.9760 0.7243 0.023 Uiso 1 1 calc R . . . .
 C5 C 0.3809(3) 0.7299(2) 0.71213(9) 0.0162(4) Uani 1 1 d . . . . .
 H5A H 0.3194 0.6297 0.7283 0.019 Uiso 1 1 calc R . . . .
 H5B H 0.5022 0.7363 0.7359 0.019 Uiso 1 1 calc R . . . .
 C6 C 0.4113(3) 0.7199(2) 0.63121(9) 0.0124(4) Uani 1 1 d . . . . .
 C7 C 0.5003(3) 0.5580(2) 0.60983(9) 0.0110(4) Uani 1 1 d . . . . .
 C8 C 0.4168(2) 0.4068(2) 0.61647(9) 0.0133(4) Uani 1 1 d . . . . .
 C9 C 0.5025(3) 0.2649(2) 0.59585(10) 0.0170(4) Uani 1 1 d . . . . .
 H9 H 0.4410 0.1645 0.6016 0.020 Uiso 1 1 calc R . . . .
 C10 C 0.6779(3) 0.2691(2) 0.56678(10) 0.0184(4) Uani 1 1 d . . . . .
 H10 H 0.7363 0.1724 0.5517 0.022 Uiso 1 1 calc R . . . .
 C11 C 0.7665(3) 0.4162(2) 0.56000(9) 0.0165(4) Uani 1 1 d . . . . .
 H11 H 0.8870 0.4206 0.5405 0.020 Uiso 1 1 calc R . . . .
 C12 C 0.6800(3) 0.5572(2) 0.58163(9) 0.0138(4) Uani 1 1 d . . . . .
 H12 H 0.7442 0.6568 0.5773 0.017 Uiso 1 1 calc R . . . .

loop_
  _atom_site_aniso_label
  _atom_site_aniso_U_11
  _atom_site_aniso_U_22
  _atom_site_aniso_U_33
  _atom_site_aniso_U_23
  _atom_site_aniso_U_13
  _atom_site_aniso_U_12
 Cl1 0.0146(2) 0.0178(2) 0.0251(2) 0.00300(19) 0.00397(18) -0.0036(2)
 O1 0.0222(7) 0.0172(7) 0.0132(6) -0.0022(5) -0.0039(6) 0.0020(6)
 O2 0.0117(6) 0.0202(7) 0.0190(6) -0.0001(6) -0.0025(5) 0.0013(6)
 N1 0.0139(8) 0.0108(8) 0.0233(8) -0.0005(7) 0.0025(7) -0.0013(7)
 C1 0.0139(9) 0.0117(9) 0.0108(8) 0.0035(7) 0.0033(7) -0.0014(7)
 C2 0.0095(8) 0.0125(9) 0.0163(8) -0.0006(8) -0.0008(6) -0.0010(8)
 C3 0.0159(9) 0.0253(10) 0.0153(8) -0.0045(9) 0.0040(7) 0.0040(9)
 C4 0.0219(10) 0.0220(10) 0.0145(8) -0.0058(8) -0.0013(7) 0.0049(9)
 C5 0.0181(9) 0.0179(10) 0.0127(8) -0.0025(7) -0.0020(7) 0.0032(8)
 C6 0.0120(9) 0.0109(9) 0.0143(9) -0.0012(7) 0.0012(7) -0.0001(7)
 C7 0.0120(8) 0.0113(9) 0.0097(8) 0.0011(6) -0.0020(7) 0.0002(7)
 C8 0.0116(8) 0.0165(10) 0.0119(8) 0.0018(8) -0.0004(7) 0.0005(8)
 C9 0.0199(10) 0.0112(9) 0.0199(9) 0.0010(7) -0.0044(8) -0.0018(8)
 C10 0.0214(10) 0.0133(9) 0.0204(9) -0.0034(7) -0.0013(8) 0.0061(9)
 C11 0.0145(9) 0.0194(10) 0.0155(8) 0.0007(7) 0.0010(7) 0.0031(8)
 C12 0.0139(9) 0.0132(9) 0.0143(8) 0.0019(7) -0.0012(7) 0.0000(8)

_geom_special_details
;
 All esds (except the esd in the dihedral angle between two l.s. planes)
 are estimated using the full covariance matrix.  The cell esds are taken
 into account individually in the estimation of esds in distances, angles
 and torsion angles; correlations between esds in cell parameters are only
 used when they are defined by crystal symmetry.  An approximate (isotropic)
 treatment of cell esds is used for estimating esds involving l.s. planes.
;
loop_
  _geom_bond_atom_site_label_1
  _geom_bond_atom_site_label_2
  _geom_bond_distance
  _geom_bond_site_symmetry_2
  _geom_bond_publ_flag
 Cl1 C8 1.7543(18) . ?
 O1 C1 1.211(2) . ?
 O2 H2 0.870(19) . ?
 O2 C2 1.415(2) . ?
 N1 H1A 0.915(18) . ?
 N1 H1B 0.927(19) . ?
 N1 C6 1.468(2) . ?
 C1 C2 1.527(3) . ?
 C1 C6 1.546(2) . ?
 C2 H2A 1.0000 . ?
 C2 C3 1.525(2) . ?
 C3 H3A 0.9900 . ?
 C3 H3B 0.9900 . ?
 C3 C4 1.526(3) . ?
 C4 H4A 0.9900 . ?
 C4 H4B 0.9900 . ?
 C4 C5 1.530(3) . ?
 C5 H5A 0.9900 . ?
 C5 H5B 0.9900 . ?
 C5 C6 1.549(2) . ?
 C6 C7 1.541(2) . ?
 C7 C8 1.396(3) . ?
 C7 C12 1.410(3) . ?
 C8 C9 1.385(3) . ?
 C9 H9 0.9500 . ?
 C9 C10 1.388(3) . ?
 C10 H10 0.9500 . ?
 C10 C11 1.382(3) . ?
 C11 H11 0.9500 . ?
 C11 C12 1.388(3) . ?
 C12 H12 0.9500 . ?

loop_
  _geom_angle_atom_site_label_1
  _geom_angle_atom_site_label_2
  _geom_angle_atom_site_label_3
  _geom_angle
  _geom_angle_site_symmetry_1
  _geom_angle_site_symmetry_3
  _geom_angle_publ_flag
 C2 O2 H2 107.7(17) . . ?
 H1A N1 H1B 110(2) . . ?
 C6 N1 H1A 110.7(15) . . ?
 C6 N1 H1B 109.4(16) . . ?
 O1 C1 C2 121.47(16) . . ?
 O1 C1 C6 122.61(16) . . ?
 C2 C1 C6 115.73(15) . . ?
 O2 C2 C1 112.33(15) . . ?
 O2 C2 H2A 108.6 . . ?
 O2 C2 C3 108.55(14) . . ?
 C1 C2 H2A 108.6 . . ?
 C3 C2 C1 110.01(16) . . ?
 C3 C2 H2A 108.6 . . ?
 C2 C3 H3A 109.5 . . ?
 C2 C3 H3B 109.5 . . ?
 C2 C3 C4 110.53(15) . . ?
 H3A C3 H3B 108.1 . . ?
 C4 C3 H3A 109.5 . . ?
 C4 C3 H3B 109.5 . . ?
 C3 C4 H4A 109.3 . . ?
 C3 C4 H4B 109.3 . . ?
 C3 C4 C5 111.66(16) . . ?
 H4A C4 H4B 107.9 . . ?
 C5 C4 H4A 109.3 . . ?
 C5 C4 H4B 109.3 . . ?
 C4 C5 H5A 109.0 . . ?
 C4 C5 H5B 109.0 . . ?
 C4 C5 C6 112.99(16) . . ?
 H5A C5 H5B 107.8 . . ?
 C6 C5 H5A 109.0 . . ?
 C6 C5 H5B 109.0 . . ?
 N1 C6 C1 101.88(14) . . ?
 N1 C6 C5 106.98(15) . . ?
 N1 C6 C7 114.56(14) . . ?
 C1 C6 C5 110.94(15) . . ?
 C7 C6 C1 110.64(14) . . ?
 C7 C6 C5 111.44(15) . . ?
 C8 C7 C6 125.02(16) . . ?
 C8 C7 C12 115.57(16) . . ?
 C12 C7 C6 119.40(15) . . ?
 C7 C8 Cl1 121.60(15) . . ?
 C9 C8 Cl1 115.71(15) . . ?
 C9 C8 C7 122.69(17) . . ?
 C8 C9 H9 119.9 . . ?
 C8 C9 C10 120.15(18) . . ?
 C10 C9 H9 119.9 . . ?
 C9 C10 H10 120.5 . . ?
 C11 C10 C9 119.08(18) . . ?
 C11 C10 H10 120.5 . . ?
 C10 C11 H11 119.9 . . ?
 C10 C11 C12 120.19(17) . . ?
 C12 C11 H11 119.9 . . ?
 C7 C12 H12 118.9 . . ?
 C11 C12 C7 122.29(17) . . ?
 C11 C12 H12 118.9 . . ?

loop_
  _geom_hbond_atom_site_label_D
  _geom_hbond_atom_site_label_H
  _geom_hbond_atom_site_label_A
  _geom_hbond_distance_DH
  _geom_hbond_distance_HA
  _geom_hbond_distance_DA
  _geom_hbond_angle_DHA
  _geom_hbond_site_symmetry_A
 N1 H1A O1 0.915(18) 2.211(19) 3.112(2) 168(2) 4_566
 N1 H1B O2 0.927(19) 2.55(2) 3.123(2) 120.4(18) 1_655

_shelx_res_file
;
    nih16.res created by SHELXL-2014/7

TITL NIH16 in P2(1)2(1)2(1)
REM SHELXT solution in P2(1)2(1)2(1)
REM R1 0.084, Rweak 0.018, Alpha 0.001, Orientation as input
REM Flack x = 0.041 ( 0.019 ) from Parsons' quotients
REM Formula found by SHELXT: C12 N O2 Cl
CELL 0.71073 7.2604 8.2772 18.9206 90 90 90
ZERR 4 0.0002 0.0002 0.0004 0 0 0
LATT -1
SYMM 0.5-X,-Y,0.5+Z
SYMM -X,0.5+Y,0.5-Z
SYMM 0.5+X,0.5-Y,-Z
SFAC C H Cl N O
UNIT 48 56 4 4 8
EQIV $1 1+X,+Y,+Z
EQIV $2 0.5+X,1.5-Y,1-Z
DFIX 0.95 N1 H1a N1 H1b O2 H2

L.S. 10
PLAN  20
SIZE 0.417 0.405 0.386
TEMP -173.15
HTAB N1 O2_$1
HTAB N1 O1_$2
ACTA 50
BOND $H
list 4
fmap 2
OMIT 0 0 10
REM <olex2.extras>
REM <HklSrc "%.\\NIH16.hkl">
REM </olex2.extras>

WGHT    0.026600    0.280900
FVAR       0.87630
CL1   3    0.195019    0.385229    0.652007    11.00000    0.01463    0.01779 =
         0.02506    0.00300    0.00397   -0.00363
O1    5    0.185194    0.666128    0.540003    11.00000    0.02219    0.01717 =
         0.01320   -0.00223   -0.00390    0.00202
O2    5   -0.061065    0.895162    0.581317    11.00000    0.01170    0.02022 =
         0.01899   -0.00011   -0.00253    0.00130
H2    2   -0.041517    0.893011    0.535941    11.00000    0.03676
N1    4    0.517240    0.863554    0.610750    11.00000    0.01386    0.01083 =
         0.02333   -0.00048    0.00248   -0.00127
H1A   2    0.549383    0.858732    0.564046    11.00000    0.02636
H1B   2    0.622201    0.870533    0.638502    11.00000    0.03155
C1    1    0.228556    0.746098    0.590933    11.00000    0.01388    0.01175 =
         0.01080    0.00348    0.00328   -0.00144
C2    1    0.112349    0.889333    0.615387    11.00000    0.00947    0.01251 =
         0.01629   -0.00062   -0.00080   -0.00100
AFIX  13
H2A   2    0.180657    0.991296    0.604587    11.00000   -1.20000
AFIX   0
C3    1    0.080878    0.879885    0.694990    11.00000    0.01590    0.02528 =
         0.01527   -0.00448    0.00400    0.00398
AFIX  23
H3A   2    0.009116    0.781527    0.706305    11.00000   -1.20000
H3B   2    0.008881    0.974912    0.710685    11.00000   -1.20000
AFIX   0
C4    1    0.264404    0.875415    0.734210    11.00000    0.02189    0.02204 =
         0.01446   -0.00584   -0.00127    0.00494
AFIX  23
H4A   2    0.241066    0.870402    0.785715    11.00000   -1.20000
H4B   2    0.333521    0.976004    0.724314    11.00000   -1.20000
AFIX   0
C5    1    0.380912    0.729856    0.712132    11.00000    0.01807    0.01790 =
         0.01268   -0.00247   -0.00202    0.00323
AFIX  23
H5A   2    0.319398    0.629727    0.728315    11.00000   -1.20000
H5B   2    0.502151    0.736253    0.735913    11.00000   -1.20000
AFIX   0
C6    1    0.411329    0.719867    0.631206    11.00000    0.01197    0.01090 =
         0.01431   -0.00118    0.00119   -0.00010
C7    1    0.500260    0.558002    0.609829    11.00000    0.01199    0.01134 =
         0.00968    0.00115   -0.00198    0.00021
C8    1    0.416836    0.406799    0.616473    11.00000    0.01159    0.01655 =
         0.01187    0.00185   -0.00036    0.00049
C9    1    0.502480    0.264908    0.595852    11.00000    0.01988    0.01116 =
         0.01995    0.00103   -0.00443   -0.00175
AFIX  43
H9    2    0.441004    0.164454    0.601624    11.00000   -1.20000
AFIX   0
C10   1    0.677910    0.269145    0.566776    11.00000    0.02142    0.01334 =
         0.02036   -0.00336   -0.00133    0.00606
AFIX  43
H10   2    0.736297    0.172354    0.551739    11.00000   -1.20000
AFIX   0
C11   1    0.766510    0.416160    0.559999    11.00000    0.01446    0.01942 =
         0.01553    0.00067    0.00101    0.00305
AFIX  43
H11   2    0.886951    0.420612    0.540474    11.00000   -1.20000
AFIX   0
C12   1    0.680041    0.557242    0.581631    11.00000    0.01387    0.01321 =
         0.01428    0.00193   -0.00121    0.00002
AFIX  43
H12   2    0.744188    0.656784    0.577294    11.00000   -1.20000
AFIX   0
HKLF 4

REM  NIH16 in P2(1)2(1)2(1)
REM R1 =  0.0234 for    2247 Fo > 4sig(Fo)  and  0.0249 for all    2330 data
REM    157 parameters refined using      3 restraints

END

WGHT      0.0266      0.2809

REM Highest difference peak  0.213,  deepest hole -0.180,  1-sigma level  0.038
Q1    1   0.4594  0.6369  0.6206  11.00000  0.05    0.21
Q2    1   0.0972  0.8839  0.6552  11.00000  0.05    0.21
Q3    1   0.1760  0.8208  0.6007  11.00000  0.05    0.18
Q4    1   0.5971  0.5538  0.6054  11.00000  0.05    0.17
Q5    1   0.3192  0.7266  0.6148  11.00000  0.05    0.17
Q6    1   0.3987  0.7195  0.6687  11.00000  0.05    0.17
Q7    1   0.1766  0.8898  0.7125  11.00000  0.05    0.16
Q8    1   0.4805  0.3240  0.6293  11.00000  0.05    0.15
Q9    1   0.4731  0.7778  0.6205  11.00000  0.05    0.14
Q10   1   0.7319  0.3385  0.5794  11.00000  0.05    0.14
Q11   1   0.3033  0.7897  0.7214  11.00000  0.05    0.13
Q12   1   0.4546  0.9489  0.6151  11.00000  0.05    0.13
Q13   1   0.8087  0.1205  0.6441  11.00000  0.05    0.13
Q14   1   0.7258  0.4725  0.5838  11.00000  0.05    0.13
Q15   1   0.4404  0.3366  0.5918  11.00000  0.05    0.12
Q16   1   0.6844  1.0522  0.6431  11.00000  0.05    0.12
Q17   1   0.7556  0.0506  0.5938  11.00000  0.05    0.12
Q18   1   0.6073  0.2605  0.6015  11.00000  0.05    0.12
Q19   1   0.7002  0.4843  0.5552  11.00000  0.05    0.12
Q20   1   0.4727  0.2029  0.6097  11.00000  0.05    0.11
;
_shelx_res_checksum               54929
_shelx_hkl_file
;
   1   0   0    0.10    0.70
   1   0   0    0.20    0.60
  -1   0   0    0.30    0.60
   1   0   0   -0.60    0.50
  -1   0   0   -1.50    0.60
  -1   0   0   -0.60    0.60
  -2   0   0  481.75   21.60
  -2   0   0  492.65   21.80
  -2   0   0  582.34   22.10
   2   0   0  536.35   20.90
   2   0   0  536.45   21.70
   2   0   0  514.45   21.90
   2   0   0  497.95   21.80
   3   0   0    0.70    1.20
  -3   0   0    1.90    1.70
   3   0   0    0.70    1.30
   3   0   0   -0.20    1.30
   3   0   0   -0.70    0.80
  -3   0   0   -2.30    1.10
  -3   0   0    1.00    1.20
  -4   0   0  781.82   33.00
   4   0   0  787.82   32.50
   4   0   0  805.32   32.90
   4   0   0  723.93   30.50
  -4   0   0  723.83   32.80
   4   0   0  799.92   33.00
  -4   0   0  678.13   32.00
   5   0   0    2.40    1.30
  -5   0   0    1.90    1.80
  -5   0   0    0.70    2.00
   5   0   0    2.80    2.40
  -5   0   0   -0.90    2.10
  -6   0   0   18.20    4.70
  -6   0   0   10.20    3.70
   6   0   0   20.70    2.80
   6   0   0   16.60    4.30
  -7   0   0    3.00    2.90
  -7   0   0    3.80    3.30
   7   0   0    0.40    3.00
  -8   0   0  194.58   14.40
  -8   0   0  191.58   13.60
  -9   0   0   -0.90    3.30
  -9   0   0    5.50    4.40
   0   1   0   -1.60    0.60
   0   1   0   -2.00    0.40
   0  -1   0   -2.10    0.40
   0   1   0   -1.80    0.60
   0  -1   0   -2.10    0.50
   0   1   0   -2.20    0.50
   0  -1   0    1.90    0.80
   0  -1   0   -2.10    0.40
  -1  -1   0   14.90    1.50
  -1  -1   0   14.80    1.80
  -1   1   0   15.90    1.60
  -1   1   0   14.60    1.90
  -1   1   0   17.60    1.90
  -1   1   0   13.70    1.70
  -1  -1   0   17.10    2.00
   1   1   0   16.70    1.70
   1   1   0   16.90    1.90
   1  -1   0   17.10    1.70
   1  -1   0   16.00    1.90
   1  -1   0   16.60    1.90
   1   1   0   17.30    1.90
  -2  -1   0  254.97   10.60
   2  -1   0  233.68   11.30
   2   1   0  258.47   10.60
   2   1   0  243.18   11.40
  -2   1   0  242.18   11.50
   2   1   0  252.57   11.50
  -2  -1   0  248.78   11.40
   2  -1   0  253.57   11.20
  -2  -1   0  226.18   11.40
  -2   1   0  243.68   11.10
  -2   1   0  230.78   11.30
   3  -1   0  301.07   13.40
  -3   1   0  288.87   13.80
   3  -1   0  269.97   13.60
  -3   1   0  281.77   13.30
  -3   1   0  276.47   13.80
  -3  -1   0  273.07   13.40
   3   1   0  291.37   13.80
  -3  -1   0  292.57   12.40
   3   1   0  285.17   13.70
  -3  -1   0  291.97   13.90
  -3  -1   0  287.67   13.90
   3  -1   0  302.47   13.80
   3   1   0  254.67   12.20
  -4   1   0  121.19    7.50
  -4  -1   0  116.69    7.70
  -4   1   0  112.19    7.90
   4  -1   0  126.49    8.00
   4   1   0  112.69    6.10
   4  -1   0  112.89    7.30
   4   1   0  132.59    8.10
   4  -1   0  105.29    7.70
   4   1   0  114.29    7.80
  -4  -1   0  119.29    8.00
  -4  -1   0  100.69    7.60
  -4   1   0  115.39    8.00
   5  -1   0   10.50    2.90
  -5   1   0   11.50    3.20
   5  -1   0   10.60    2.10
  -5   1   0    8.00    3.10
  -5  -1   0    9.80    3.10
   5   1   0   12.60    3.20
  -5   1   0   13.60    3.20
  -5  -1   0   14.40    3.60
   5   1   0   13.70    2.20
  -5  -1   0    8.60    2.80
   6   1   0   22.30    2.90
   6   1   0   18.70    4.50
   6  -1   0   23.90    4.80
  -6  -1   0   22.90    5.10
   6  -1   0   27.10    3.10
  -6   1   0   17.80    4.10
  -6  -1   0   22.80    4.60
  -6   1   0   22.30    4.80
  -6  -1   0   24.80    5.20
  -6   1   0   29.10    5.40
  -7   1   0  424.36   23.90
  -7  -1   0  442.16   23.20
  -7  -1   0  448.86   24.30
  -7   1   0  480.15   23.40
  -8   1   0    2.40    3.30
  -8  -1   0    4.60    3.80
  -8  -1   0    4.60    4.30
  -8   1   0    3.60    3.60
  -9  -1   0  181.28   14.10
  -9  -1   0  168.78   14.60
  -9   1   0  184.98   13.80
  -9   1   0  172.88   15.00
   0  -2   0 1520.75   57.19
   0  -2   0 1405.56   56.89
   0  -2   0 1457.25   57.09
   0   2   0 1416.16   56.89
   0   2   0 1372.86   56.99
   0   2   0 1482.85   57.19
   0  -2   0 1402.46   57.09
   0   2   0 1446.16   57.09
  -1  -2   0 2066.39   81.39
  -1  -2   0 2109.39   81.79
  -1  -2   0 2030.50   81.59
   1   2   0 2106.39   81.79
   1  -2   0 2032.70   81.19
   1  -2   0 2132.89   81.39
   1   2   0 2163.28   81.69
  -1   2   0 2028.90   81.69
   1   2   0 2054.69   81.59
  -1   2   0 1977.90   81.69
   1  -2   0 2117.69   81.79
   1  -2   0 2029.50   81.69
   1  -2   0 2156.38   81.79
  -1  -2   0 2161.38   81.79
  -1   2   0 2031.20   81.69
   1   2   0 2067.39   81.39
   2   2   0   10.50    1.90
  -2   2   0   15.60    2.70
   2  -2   0   10.10    2.00
  -2   2   0   15.30    2.40
  -2   2   0   15.30    2.40
  -2  -2   0   11.50    2.20
   2  -2   0   10.80    2.30
  -2  -2   0   13.00    2.40
   2  -2   0    9.80    2.30
  -2  -2   0    9.50    1.70
  -2   2   0   16.20    2.40
   2   2   0    7.00    2.00
   2   2   0   11.90    2.30
   3   2   0  932.11   37.80
  -3  -2   0  847.02   37.70
  -3   2   0  898.81   37.90
   3  -2   0  895.71   37.10
   3  -2   0  925.71   37.70
  -3   2   0  927.31   37.30
   3   2   0  903.61   36.50
  -3   2   0  952.90   38.10
   3   2   0  902.21   37.60
  -3  -2   0  882.31   36.40
   3  -2   0  795.92   37.50
  -3  -2   0  907.71   37.70
  -4   2   0    3.30    2.50
  -4  -2   0    3.30    1.50
   4   2   0   -0.10    1.60
  -4   2   0    2.30    1.90
   4  -2   0    2.70    2.20
   4  -2   0    3.50    2.30
   4   2   0    0.80    1.90
  -4   2   0    1.00    2.10
  -4  -2   0    0.40    2.00
   4  -2   0    2.40    1.90
   4   2   0    3.00    1.60
  -4  -2   0    5.70    2.30
  -4  -2   0   -0.70    1.80
  -5  -2   0   28.70    4.90
   5  -2   0   29.60    4.90
  -5   2   0   24.70    4.60
   5   2   0   29.20    4.80
  -5   2   0   30.50    5.00
  -5  -2   0   24.40    4.20
   5   2   0   28.90    3.50
  -5   2   0   24.80    4.20
  -5  -2   0   32.80    5.20
  -6  -2   0   -1.90    2.60
   6  -2   0    3.30    2.40
  -6   2   0    1.50    3.00
   6   2   0   -3.00    2.20
  -6   2   0   -0.10    2.90
   6   2   0    3.70    1.90
  -6  -2   0   -0.40    2.80
  -6  -2   0   -2.40    2.40
  -6   2   0    5.10    3.00
  -7  -2   0  358.46   19.80
  -7   2   0  388.26   20.90
  -7   2   0  322.67   18.80
  -7  -2   0  325.97   20.10
  -8   2   0   29.70    6.50
  -8  -2   0   28.90    6.90
  -8   2   0   23.60    6.60
  -8  -2   0   32.90    6.60
   0  -3   0   -0.80    1.70
   0  -3   0   -0.20    1.70
   0   3   0   -3.00    1.20
   0  -3   0   -5.00    1.30
   0  -3   0   -3.40    1.10
   0   3   0   -4.70    1.30
   0   3   0   -1.20    1.60
   0   3   0   -2.70    1.60
   1   3   0 1673.63   68.69
  -1  -3   0 1787.62   68.39
  -1  -3   0 1707.03   68.59
   1   3   0 1668.83   68.59
   1  -3   0 1674.63   68.69
  -1   3   0 1720.53   68.79
  -1   3   0 1614.74   68.59
  -1  -3   0 1761.42   68.79
  -1  -3   0 1752.62   68.79
   1  -3   0 1772.32   68.89
   1   3   0 1736.93   68.39
  -1   3   0 1754.72   68.89
   1  -3   0 1727.83   68.29
   1   3   0 1734.83   68.79
   1  -3   0 1717.23   68.69
  -2  -3   0 1021.20   38.90
  -2   3   0  959.60   39.70
  -2  -3   0  923.21   39.40
   2  -3   0  936.91   38.60
   2  -3   0  938.71   39.40
  -2   3   0  862.21   39.10
   2   3   0  933.61   38.80
  -2  -3   0  971.10   39.70
   2   3   0  947.51   39.30
   2  -3   0  976.40   38.90
  -2   3   0  971.60   39.60
   2   3   0  953.00   39.40
  -2  -3   0  952.50   39.30
   2  -3   0  872.61   39.30
  -3  -3   0   -1.60    1.10
  -3   3   0   -1.70    1.10
   3   3   0    0.60    1.50
  -3   3   0   -0.30    1.30
   3  -3   0    1.20    1.80
  -3   3   0    2.70    1.80
  -3   3   0    0.70    2.10
   3  -3   0   -0.50    1.70
   3   3   0   -0.50    1.50
   3  -3   0    4.00    2.00
  -3  -3   0    1.70    2.00
   3  -3   0    1.50    1.50
  -3  -3   0   -1.10    1.60
   3   3   0    0.80    1.90
   4   3   0  609.64   26.00
   4   3   0  623.14   27.50
  -4  -3   0  592.24   27.70
  -4  -3   0  553.84   27.20
   4  -3   0  612.84   29.00
   4  -3   0  607.44   27.60
  -4   3   0  583.84   27.50
   4  -3   0  630.04   25.80
  -4   3   0  536.55   26.30
  -4   3   0  580.74   27.90
  -4  -3   0  595.14   25.80
  -4   3   0  647.64   28.10
  -5   3   0   26.00    4.30
  -5   3   0   12.70    3.80
  -5  -3   0   16.20    4.20
  -5  -3   0   15.30    3.20
   5   3   0   17.30    3.20
   5   3   0   19.70    4.10
  -5  -3   0   19.10    4.40
  -5   3   0   16.20    4.20
  -5  -3   0   14.60    3.60
  -5   3   0   21.50    4.80
   5  -3   0   23.20    4.30
   5  -3   0   26.00    3.70
   6   3   0  714.93   33.80
  -6   3   0  724.83   35.00
  -6  -3   0  694.73   34.20
  -6   3   0  712.13   32.90
  -6  -3   0  788.82   31.40
   6  -3   0  719.53   34.00
  -6  -3   0  717.93   34.30
   6   3   0  696.93   30.90
  -6  -3   0  712.53   33.70
  -6   3   0  712.53   34.40
  -7   3   0  366.06   22.50
  -7  -3   0  388.46   22.30
  -7  -3   0  402.66   21.90
  -7   3   0  371.66   22.10
  -7   3   0  404.26   20.90
  -8   3   0    4.00    4.40
  -8   3   0    4.50    3.70
  -8  -3   0    0.30    3.60
  -8   3   0    1.90    4.60
  -8  -3   0    1.30    3.10
   0   4   0 4130.39  164.08
   0  -4   0 4216.78  164.18
   0   4   0 4210.58  164.08
   0  -4   0 4134.39  163.68
   0   4   0 4373.76  164.38
   0  -4   0 4251.07  164.18
   0   4   0 3998.60  163.68
   0  -4   0 4196.38  164.18
  -1   4   0  792.02   33.30
  -1  -4   0  723.93   33.20
   1   4   0  802.72   33.30
   1  -4   0  771.12   33.30
  -1  -4   0  756.82   33.10
   1   4   0  753.22   32.90
  -1   4   0  706.93   33.10
   1  -4   0  762.72   33.30
  -1  -4   0  805.92   33.40
   1   4   0  744.13   33.20
  -1  -4   0  791.02   32.90
  -1   4   0  793.92   33.50
   1  -4   0  811.42   33.50
   1   4   0  814.22   33.50
   1  -4   0  807.32   32.90
   2  -4   0  207.58   10.90
  -2   4   0  195.48   11.30
   2  -4   0  176.68   10.90
  -2  -4   0  191.58   11.20
   2   4   0  199.48   11.40
  -2   4   0  218.38   11.80
  -2   4   0  212.98   11.80
  -2  -4   0  193.38   11.40
  -2  -4   0  227.28   11.10
   2   4   0  208.48   11.40
   2  -4   0  211.88   10.80
   2   4   0  212.78   11.10
   2  -4   0  185.08   11.20
  -3   4   0  144.99    9.50
   3   4   0  125.39    8.90
   3  -4   0  143.09    8.40
  -3   4   0  139.69    9.40
  -3  -4   0  135.29    8.30
  -3  -4   0  133.69    9.20
   3  -4   0  140.39    9.10
   3  -4   0  136.99    9.00
   3   4   0  146.39    8.60
   3   4   0  146.49   10.50
  -3  -4   0  134.49    8.90
  -3   4   0  140.79    9.60
  -4   4   0   60.19    7.30
  -4   4   0   43.20    5.80
  -4  -4   0   40.40    5.90
   4  -4   0   50.79    5.10
   4  -4   0   42.10    5.90
  -4  -4   0   51.59    6.40
   4   4   0   46.20    5.90
  -4   4   0   52.79    5.90
   4   4   0   49.70    5.30
  -4   4   0   55.59    6.80
  -5   4   0 1099.59   48.40
   5   4   0 1119.29   48.10
   5   4   0 1140.29   46.20
  -5  -4   0 1077.59   48.40
  -5   4   0 1007.50   48.50
  -5   4   0 1068.09   46.90
  -5  -4   0 1149.58   48.30
  -6   4   0   35.60    5.80
  -6  -4   0   34.00    6.10
  -6   4   0   32.00    6.70
  -6   4   0   32.90    6.40
   6   4   0   30.70    4.60
   6  -4   0   50.69    7.30
  -6  -4   0   40.60    6.80
  -7  -4   0    4.00    3.20
  -7   4   0    5.40    3.50
  -7   4   0    1.80    3.60
  -7   4   0   -1.30    3.90
  -7  -4   0    5.60    4.20
  -8   4   0  342.07   21.90
  -8   4   0  360.16   20.20
  -8   4   0  324.17   22.50
  -8  -4   0  340.17   21.00
  -8  -4   0  322.77   21.60
   0   5   0    0.10    2.00
   0  -5   0    1.10    1.70
   0  -5   0   -1.70    1.70
   0   5   0    2.10    2.00
   0   5   0    3.50    1.90
   0   5   0    0.50    1.60
  -1   5   0   20.90    3.60
   1  -5   0   22.30    4.00
  -1   5   0   30.80    4.50
   1   5   0   20.50    3.90
  -1  -5   0   24.70    4.10
  -1  -5   0   24.90    4.00
   1   5   0   20.20    3.80
   1   5   0   16.90    3.60
  -1   5   0   19.20    3.90
   1  -5   0   24.20    4.10
   1   5   0   27.50    4.40
  -2  -5   0  124.49    8.60
   2  -5   0  120.19    8.60
   2  -5   0  122.39    8.90
   2   5   0  130.39    8.60
  -2  -5   0  129.39    8.90
  -2   5   0  122.39    9.00
  -2   5   0  143.59    9.50
  -2   5   0  127.49    9.00
   2   5   0  124.19    8.90
  -3   5   0    6.00    3.20
  -3   5   0    6.70    3.10
   3  -5   0    4.60    2.80
  -3  -5   0    5.30    2.80
  -3  -5   0    8.70    3.40
  -3   5   0    1.80    2.60
   3   5   0    2.70    2.40
   3   5   0    4.30    2.70
  -4   5   0  300.27   17.10
  -4   5   0  281.67   17.40
   4  -5   0  306.07   17.20
  -4  -5   0  320.27   17.20
   4   5   0  302.27   16.80
  -4  -5   0  308.47   17.40
   4   5   0  324.17   16.40
   5   5   0    1.60    2.80
   5  -5   0   -2.00    2.60
   5   5   0    0.30    2.30
  -5   5   0    0.70    3.40
  -5  -5   0    3.90    3.60
  -5   5   0    1.70    2.40
  -6  -5   0  170.88   13.50
   6   5   0  177.88   11.40
  -6   5   0  163.18   13.30
  -6  -5   0  174.78   13.20
  -6   5   0  201.08   13.00
  -6   5   0  213.28   15.00
  -7   5   0  748.53   37.40
  -7  -5   0  665.03   34.80
  -7   5   0  714.33   34.20
  -7   5   0  692.83   36.00
  -7  -5   0  732.43   36.40
   0   6   0 2390.96   95.99
   0  -6   0 2340.27   95.79
   0   6   0 2336.37   95.49
   0  -6   0 2306.27   95.99
   0   6   0 2426.36   95.99
   1  -6   0    2.50    2.70
   1   6   0    1.30    2.50
  -1  -6   0    1.90    2.30
   1   6   0    1.20    2.00
  -1   6   0   -2.20    2.20
   1  -6   0    5.50    2.60
  -1  -6   0   -1.40    2.40
   1   6   0   -0.10    1.80
  -1   6   0    6.40    3.10
  -2   6   0   -0.80    2.50
   2   6   0    0.60    2.50
  -2   6   0   -2.30    2.20
   2  -6   0   -4.40    2.00
   2   6   0    1.20    2.70
  -2  -6   0   -3.50    1.30
  -2  -6   0    0.70    2.60
   3   6   0  429.56   22.30
  -3   6   0  423.16   22.50
   3   6   0  430.76   21.80
  -3  -6   0  468.45   22.70
  -3   6   0  467.05   23.20
  -3  -6   0  417.46   22.50
   3  -6   0  410.96   22.20
  -4   6   0    8.50    4.00
   4   6   0    6.60    3.10
   4  -6   0    4.20    3.40
   4   6   0    6.00    3.40
  -4   6   0    6.50    3.30
  -4  -6   0    4.90    3.30
   5   6   0   67.59    7.70
  -5  -6   0   83.69   10.00
   5  -6   0   90.19   10.10
  -5   6   0   91.19   10.20
  -5   6   0   84.99   10.30
  -6   6   0   35.40    7.70
   6   6   0   42.90    6.20
  -6   6   0   35.70    7.40
  -6  -6   0   48.20    8.30
  -7  -6   0  236.08   17.60
  -7   6   0  245.38   20.50
  -7  -6   0  260.77   17.60
  -7   6   0  232.58   18.30
   0  -7   0    1.90    3.00
   0   7   0   -0.70    2.60
   0   7   0    1.40    2.80
  -1  -7   0   98.09    9.60
   1   7   0  102.09    9.60
  -1   7   0  116.69    9.30
   1   7   0   88.39    9.20
   1   7   0   95.49    9.60
   1  -7   0  100.79   10.00
  -1   7   0   80.29    9.10
  -2   7   0  344.27   19.40
   2  -7   0  346.47   19.20
  -2   7   0  332.47   19.30
   2   7   0  342.07   19.20
  -2  -7   0  345.57   19.50
   2   7   0  350.96   19.00
   3  -7   0  261.57   17.10
  -3   7   0  303.87   17.70
   3   7   0  277.07   17.10
  -3  -7   0  299.57   17.90
   3   7   0  304.67   17.10
  -3   7   0  302.97   18.10
   4   7   0  613.84   29.90
   4  -7   0  603.94   31.10
  -4  -7   0  645.14   31.80
  -4   7   0  669.23   32.00
  -4   7   0  594.54   31.60
  -5  -7   0   19.20    5.70
   5   7   0   10.00    4.10
  -5   7   0   15.70    5.50
  -5   7   0   18.20    5.20
  -6  -7   0  376.56   22.80
  -6   7   0  341.77   22.80
   6   7   0  355.96   19.90
   0   8   0 1291.87   55.99
   0   8   0 1284.97   55.99
   0  -8   0 1221.38   55.89
   1   8   0  194.38   13.30
   1   8   0  176.28   12.90
  -1   8   0  190.38   13.50
  -1  -8   0  171.08   12.80
   1  -8   0  185.68   13.50
  -1   8   0  168.48   12.90
   2  -8   0   53.99    8.10
  -2   8   0   59.19    8.30
   2   8   0   56.19    7.90
   2   8   0   60.49   10.70
  -2   8   0   42.60    7.50
  -2  -8   0   73.09    9.40
   3  -8   0  132.69   11.30
  -3   8   0  148.09   12.30
  -3   8   0  128.69   12.60
   3   8   0  156.28   11.90
  -3  -8   0  132.29   11.40
  -4   8   0   23.70    6.50
  -4   8   0   26.00    6.20
   4   8   0   15.50    5.10
  -4  -8   0   15.50    5.70
   5   8   0   -1.80    3.00
  -5  -8   0    3.40    4.60
  -5   8   0    1.80    4.20
   0  -9   0    3.20    3.80
   0   9   0   -1.60    3.10
  -1  -9   0  160.78   13.70
   1  -9   0  188.58   14.30
  -1   9   0  171.38   13.60
   1   9   0  174.58   13.60
  -2   9   0   25.10    6.30
  -2  -9   0   11.70    5.30
   2  -9   0   17.80    6.60
  -3  -9   0    5.20    3.90
  -3   9   0    0.10    3.90
   3   9   0    0.80    4.20
  -4   9   0   47.00    8.80
  -4  -9   0   31.20    7.40
   4   9   0   44.20    8.00
   0  10   0   -3.60    3.60
  -1  10   0   32.70    7.60
   1  10   0   28.80    7.50
  -2  10   0    3.50    4.70
   0   0   1    0.00    0.10
   0   0  -1   -0.10    0.10
  -1   0   1  676.03   28.90
  -1   0   1  733.13   29.00
   1   0  -1  745.83   28.90
   1   0   1  739.63   29.20
   1   0   1  714.93   29.10
  -1   0  -1  751.22   29.20
  -1   0  -1  705.43   29.10
  -1   0   1  773.72   28.80
   1   0   1  775.12   29.20
  -1   0  -1  707.93   29.10
  -2   0   1 1415.76   52.69
   2   0   1 1416.86   53.09
   2   0  -1 1285.07   52.79
   2   0   1 1378.06   53.19
  -2   0   1 1342.77   52.99
   2   0  -1 1340.57   52.79
   2   0   1 1370.06   53.19
  -2   0   1 1300.77   52.89
   2   0  -1 1277.77   51.59
   2   0  -1 1235.88   52.49
  -2   0  -1 1229.18   52.79
  -2   0  -1 1332.47   53.09
  -2   0  -1 1402.46   53.19
  -3   0  -1 1187.18   48.30
   3   0  -1 1140.59   46.00
  -3   0   1 1076.79   47.80
   3   0   1 1247.48   48.30
  -3   0   1 1173.08   47.50
   3   0   1 1165.58   46.70
   3   0  -1 1183.38   47.90
  -3   0  -1 1170.98   48.20
  -3   0  -1 1157.78   47.80
   3   0   1 1099.09   48.00
   3   0  -1 1252.47   47.60
   3   0   1 1250.47   48.00
  -3   0   1 1256.17   48.20
   3   0  -1 1131.49   47.80
   4   0  -1 4302.27  164.38
   4   0   1 4292.27  162.48
  -4   0   1 3855.41  163.48
   4   0   1 4269.57  165.48
   4   0   1 3947.81  164.28
  -4   0  -1 4034.70  164.48
   4   0  -1 4035.00  164.18
  -4   0  -1 4312.47  164.78
  -4   0  -1 4197.18  164.08
  -4   0   1 4446.56  164.68
  -4   0   1 4208.58  164.58
   4   0  -1 4192.68  161.68
   4   0   1 4334.07  164.58
  -5   0  -1  104.99    7.90
  -5   0   1  110.49    8.40
   5   0   1   98.89    6.20
   5   0   1   96.89    8.00
   5   0  -1  132.39    8.60
   5   0  -1  105.69    5.70
  -5   0   1  106.59    8.30
  -5   0  -1  115.19    8.50
  -5   0   1  112.19    7.80
  -5   0  -1  134.89    9.10
  -6   0   1  277.77   15.70
   6   0  -1  272.77   12.60
  -6   0  -1  306.87   16.90
  -6   0   1  279.17   16.50
  -6   0  -1  280.67   16.10
   6   0   1  292.17   13.60
   6   0   1  300.47   16.60
   6   0  -1  301.07   16.40
  -7   0   1  496.85   26.20
  -7   0  -1  551.74   27.00
   7   0   1  540.85   26.40
  -7   0   1  543.15   25.50
   7   0   1  467.35   22.10
  -7   0  -1  460.85   25.10
  -8   0  -1   14.20    5.20
  -8   0   1   21.10    5.30
  -8   0   1   18.10    5.60
  -8   0  -1   22.90    5.60
  -9   0   1   30.80    7.60
  -9   0  -1   36.10    7.40
  -9   0  -1   25.30    6.60
  -9   0   1   41.10    7.50
   0  -1  -1 1621.04   61.69
   0   1  -1 1477.95   61.79
   0   1   1 1689.13   61.49
   0  -1  -1 1419.66   61.39
   0  -1   1 1598.64   61.59
   0   1   1 1737.63   61.79
   0  -1  -1 1513.25   61.59
   0   1  -1 1637.64   61.69
  -1  -1  -1 2048.79   78.99
  -1   1   1 1944.31   78.29
  -1  -1  -1 2107.09   78.69
   1  -1   1 1981.90   78.89
   1  -1   1 2048.79   78.89
  -1  -1  -1 2032.10   78.89
   1   1  -1 2026.90   78.69
  -1   1   1 2070.59   78.79
   1  -1   1 2045.50   78.79
  -1   1   1 1993.50   78.29
   1   1  -1 2031.40   78.39
  -1   1   1 2016.40   78.79
   1  -1  -1 1901.61   78.69
  -1   1  -1 1779.52   78.89
   1   1   1 2063.09   78.89
  -1   1  -1 1974.50   78.79
   1  -1  -1 1945.31   78.29
  -1   1  -1 2113.49   78.79
   1   1   1 2006.10   78.59
  -1  -1   1 2020.20   78.69
  -1   1  -1 2059.69   78.89
   1  -1  -1 2031.90   78.39
  -1  -1   1 2093.99   78.39
  -1  -1   1 2114.19   78.69
   1   1   1 2030.70   78.99
   1  -1  -1 2085.39   78.79
  -2  -1  -1  325.57   14.80
   2   1  -1  341.87   14.60
   2  -1   1  335.47   14.80
   2   1  -1  311.87   14.40
  -2   1   1  320.37   14.70
  -2  -1  -1  373.86   14.20
  -2  -1  -1  320.27   14.70
  -2   1   1  314.17   14.10
   2  -1   1  335.87   14.60
   2   1  -1  314.97   13.60
  -2  -1  -1  343.97   14.80
  -2   1   1  342.27   14.80
   2  -1  -1  316.57   14.50
   2   1   1  325.77   14.80
  -2  -1   1  332.57   14.60
  -2  -1   1  324.67   13.60
  -2   1  -1  338.57   14.80
  -2   1  -1  322.97   14.50
   2  -1  -1  323.67   14.60
  -2  -1   1  322.87   14.50
   2  -1  -1  314.67   14.00
   2   1   1  314.87   14.00
   2   1   1  339.27   14.80
  -2   1  -1  344.17   14.90
   3   1  -1  450.75   19.40
   3   1  -1  433.96   19.40
   3  -1   1  421.86   19.50
  -3  -1  -1  457.45   19.70
   3   1  -1  447.16   17.80
  -3  -1  -1  467.45   18.50
   3  -1   1  492.95   20.00
  -3  -1  -1  418.56   19.60
   3  -1   1  400.16   19.10
  -3   1   1  449.66   19.70
  -3   1   1  435.46   18.90
  -3  -1  -1  416.06   19.40
  -3   1   1  438.66   19.50
  -3   1  -1  447.76   19.80
  -3   1  -1  423.36   19.50
   3  -1  -1  405.76   18.70
   3   1   1  404.16   18.30
  -3  -1   1  421.06   19.10
  -3  -1   1  424.86   19.40
  -3  -1   1  432.16   17.80
   3  -1  -1  418.36   19.30
   3  -1  -1  435.66   19.40
   3   1   1  395.36   19.40
  -3   1  -1  425.36   19.20
  -3  -1   1  454.35   19.60
   3   1   1  422.46   19.50
   4   1  -1 1170.78   48.90
   4  -1   1 1155.68   49.20
   4  -1   1 1236.78   49.40
   4   1  -1 1196.38   46.70
   4   1  -1 1148.69   48.80
  -4   1   1 1196.78   49.30
  -4  -1  -1 1049.70   48.60
   4  -1   1 1100.69   48.60
  -4   1   1 1170.98   49.30
  -4   1   1 1196.08   48.40
  -4  -1  -1 1199.78   49.40
  -4  -1  -1 1197.48   49.40
   4   1   1 1217.08   47.30
   4   1   1 1124.69   49.00
   4  -1  -1 1210.28   49.00
   4  -1  -1 1129.29   48.90
  -4   1  -1 1160.48   49.20
  -4   1  -1 1305.37   49.80
   4  -1  -1 1142.99   48.20
  -4  -1   1 1282.47   49.50
   4   1   1 1182.68   49.20
  -4  -1   1 1188.98   48.70
  -4   1  -1 1148.49   48.70
  -4  -1   1 1158.28   49.10
  -5  -1  -1  533.55   24.60
  -5   1   1  513.65   23.40
   5  -1   1  495.55   24.10
  -5   1   1  490.65   24.10
  -5  -1  -1  514.25   24.00
   5   1  -1  496.05   21.00
  -5   1   1  519.15   24.40
  -5  -1  -1  536.45   24.60
   5   1  -1  474.35   23.60
   5  -1  -1  522.55   24.00
  -5  -1   1  519.95   23.70
   5   1   1  499.65   21.70
  -5   1  -1  492.35   23.60
  -5  -1   1  489.05   24.10
   5   1   1  515.35   24.20
   5  -1  -1  473.45   20.90
  -5   1  -1  496.05   24.20
  -5  -1   1  461.45   23.70
  -5   1  -1  544.15   24.70
  -6   1   1  465.95   23.40
  -6  -1  -1  433.26   23.20
  -6   1   1  453.25   22.10
   6   1  -1  447.16   22.80
   6  -1   1  429.26   19.90
   6  -1   1  446.06   22.90
  -6   1   1  445.46   23.30
  -6  -1  -1  432.46   22.50
   6   1  -1  450.35   19.30
  -6  -1  -1  414.26   23.00
  -6  -1   1  496.15   23.50
   6   1   1  465.45   23.20
   6  -1  -1  455.25   19.20
  -6  -1   1  468.25   22.60
   6   1   1  459.85   20.10
  -6  -1   1  458.25   23.30
   6  -1  -1  442.26   22.80
  -6   1  -1  428.56   23.10
  -6   1  -1  491.55   22.90
  -7   1   1  450.75   24.10
  -7  -1  -1  444.56   24.10
  -7  -1  -1  452.75   23.50
  -7   1   1  486.55   23.20
   7  -1   1  425.46   20.60
   7  -1   1  429.56   23.60
   7   1   1  446.36   20.20
  -7   1  -1  465.75   23.40
  -7  -1   1  432.76   24.00
  -7  -1   1  457.75   23.10
   7   1   1  425.86   23.60
  -7   1  -1  424.26   23.80
  -8   1   1   12.10    4.30
  -8   1   1   20.60    5.90
  -8  -1  -1   22.90    5.80
  -8  -1  -1   16.30    5.50
  -8  -1   1   12.30    5.10
  -8   1  -1   18.60    5.20
  -8   1  -1   22.80    6.20
  -8  -1   1   17.50    5.20
  -9   1   1   52.89    9.30
  -9   1   1   38.20    7.30
  -9  -1  -1   58.69    9.70
  -9  -1  -1   54.69    8.90
  -9   1  -1   36.70    8.30
  -9   1  -1   55.49    8.80
  -9  -1   1   39.80    7.50
  -9  -1   1   35.40    8.20
   0   2   1 9807.52  366.16
   0   2  -1 9409.06  365.86
   0  -2  -1 8595.54  364.16
   0  -2   1 9305.77  365.06
   0  -2  -1 9962.60  366.46
   0   2  -1 9441.56  365.86
   0  -2   1 9481.75  366.06
   0   2   1 9626.54  366.06
   0  -2  -1 9672.53  365.56
   0  -2   1 9999.00  366.76
   0   2   1 9485.55  366.66
   0   2  -1 9434.26  365.66
   0   2  -1 9170.78  365.86
   0  -2  -1 9049.39  365.96
   0  -2   1 9677.43  366.26
   0   2   1 9222.08  365.96
   1  -2   1  779.42   29.80
   1   2  -1  709.93   29.60
  -1  -2  -1  688.63   29.80
   1  -2   1  732.83   29.80
   1  -2   1  748.73   29.90
  -1  -2  -1  690.63   29.70
   1   2  -1  708.43   29.70
   1   2  -1  696.63   29.30
  -1  -2  -1  707.83   29.50
   1  -2   1  676.43   29.90
  -1   2   1  734.33   29.40
  -1   2   1  677.13   29.70
  -1   2   1  678.43   29.60
  -1   2   1  710.83   29.80
  -1  -2  -1  751.52   29.70
   1  -2  -1  771.22   29.80
   1  -2  -1  697.53   29.70
  -1  -2   1  679.93   29.60
  -1   2  -1  754.82   29.90
  -1   2  -1  720.93   30.00
   1   2   1  747.13   29.80
   1   2   1  758.22   30.00
  -1  -2   1  727.93   29.30
  -1   2  -1  737.03   29.90
   1  -2  -1  747.53   29.40
  -1  -2   1  743.23   30.00
  -1  -2   1  744.13   29.70
   1   2   1  732.23   29.60
   1  -2  -1  748.53   29.30
   1  -2  -1  729.93   29.70
  -2   2   1  229.58   11.30
   2  -2   1  228.38   11.30
   2   2  -1  213.68   11.00
  -2   2   1  224.08   10.60
  -2  -2  -1  200.78   11.20
   2  -2   1  231.58   11.00
  -2  -2  -1  208.68   11.10
  -2   2   1  226.18   11.30
  -2   2   1  215.78   11.30
   2   2  -1  238.88   11.20
  -2  -2  -1  233.28   10.80
   2  -2   1  218.58   11.30
   2   2  -1  214.98   10.40
   2  -2  -1  236.58   11.40
  -2  -2   1  223.88   11.20
  -2   2  -1  230.88   11.30
  -2  -2   1  250.87   11.30
   2  -2  -1  222.28   10.30
  -2   2  -1  267.17   11.80
   2  -2  -1  267.87   10.90
  -2   2  -1  224.58   11.00
   2  -2  -1  242.68   11.30
   2   2   1  241.18   11.40
   2   2   1  240.88   11.40
  -2  -2   1  236.58   10.50
   2   2   1  227.38   10.80
  -2   2  -1  230.48   11.70
   3   2  -1   59.99    4.20
  -3   2   1   65.99    5.40
  -3  -2  -1   73.19    4.60
   3   2  -1   58.99    5.00
  -3   2   1   67.29    5.20
  -3  -2  -1   49.00    5.30
   3   2  -1   66.59    5.20
   3  -2   1   66.99    5.20
  -3   2   1   60.89    4.60
  -3  -2  -1   61.49    5.20
   3  -2   1   66.49    5.30
   3  -2   1   65.89    5.00
   3  -2  -1   71.09    4.80
   3  -2  -1   61.09    5.10
   3  -2  -1   60.09    4.10
   3   2   1   65.89    4.50
  -3  -2   1   67.39    4.20
   3   2   1   82.89    5.60
  -3   2  -1   66.89    5.50
   3   2   1   71.69    5.50
  -3   2  -1   53.99    5.60
  -3  -2   1   66.39    5.20
  -3  -2   1   64.69    5.20
  -3   2  -1   67.99    5.10
   3  -2  -1   64.09    5.30
  -4  -2  -1  163.98   10.30
  -4   2   1  181.88   10.70
   4  -2   1  185.58   10.60
  -4  -2  -1  164.88   10.50
  -4   2   1  169.58    9.70
   4   2  -1  177.98   10.40
  -4   2   1  167.08   10.60
  -4  -2  -1  172.48    9.20
  -4  -2  -1  159.68   10.40
   4   2  -1  180.78    8.80
   4  -2   1  181.48   10.70
  -4   2  -1  188.28   10.40
  -4  -2   1  160.08   10.10
  -4   2  -1  187.28   10.80
   4  -2  -1  168.88   10.30
  -4  -2   1  184.88   10.60
   4  -2  -1  191.58    9.90
  -4  -2   1  189.78    8.90
   4  -2  -1  179.88   10.40
   4   2   1  159.48   10.30
  -4   2  -1  181.98   10.90
   4   2   1  184.18   10.80
  -4  -2   1  200.28   10.90
   4   2   1  164.68    9.10
  -5  -2  -1  310.37   16.00
  -5  -2  -1  254.57   15.40
   5   2  -1  270.97   15.10
  -5   2   1  312.97   16.20
  -5   2   1  281.77   15.50
  -5   2   1  255.87   14.20
   5  -2   1  267.37   15.20
   5   2  -1  287.67   13.00
  -5  -2  -1  255.27   15.00
   5  -2  -1  279.57   15.40
  -5  -2   1  284.67   15.70
  -5  -2   1  305.27   13.10
  -5   2  -1  279.27   15.00
  -5   2  -1  271.27   15.70
  -5  -2   1  271.27   14.90
   5   2   1  276.47   13.40
   5   2   1  267.87   15.20
  -5   2  -1  257.37   15.40
  -5  -2   1  274.27   15.30
  -6   2   1  165.98   11.10
  -6  -2  -1  188.58   14.10
   6   2  -1  187.68    9.20
   6   2  -1  170.58   11.80
  -6  -2  -1  176.48   12.00
   6  -2   1  172.88   12.00
  -6   2   1  186.08   12.50
  -6  -2  -1  177.78   12.20
  -6   2   1  216.68   13.40
   6   2   1  157.28    9.40
  -6  -2   1  175.78   12.20
  -6   2  -1  156.58   11.90
  -6  -2   1  167.38   12.20
   6   2   1  154.08   11.70
  -6   2  -1  183.58   11.70
   6  -2  -1  178.38   12.00
  -6  -2   1  170.18   11.40
   7  -2   1    1.90    3.20
  -7  -2  -1    8.80    4.00
  -7   2   1    5.20    4.00
  -7  -2  -1    1.90    3.40
   7  -2   1    3.60    2.80
  -7   2   1    5.40    3.20
  -7  -2   1    7.70    3.80
  -7   2  -1    6.40    3.50
   7   2   1    5.10    2.40
  -7  -2   1    5.80    3.90
  -7   2  -1    6.00    3.90
  -8  -2  -1  153.68   12.00
  -8   2   1  149.29   14.40
  -8  -2  -1  134.39   13.70
  -8   2   1  121.49   10.40
  -8  -2   1  110.19   11.80
  -8   2  -1  143.49   14.30
  -8  -2   1  121.69   13.10
  -8   2  -1  121.39   12.20
   0   3  -1  217.58   10.80
   0  -3   1  226.08   10.60
   0   3   1  197.38   10.60
   0  -3   1  208.88   10.80
   0   3  -1  226.88   10.70
   0  -3   1  226.98   10.80
   0  -3  -1  216.18   10.50
   0  -3  -1  221.58   10.70
   0  -3  -1  221.78   10.80
   0   3  -1  213.68   10.50
   0   3   1  221.48   10.80
   0   3  -1  199.88   10.50
   0   3   1  198.08   10.30
   0   3   1  213.98   10.50
   0  -3   1  213.48   10.60
   0  -3  -1  213.98   10.50
  -1  -3  -1 1492.75   57.39
   1  -3   1 1374.16   57.39
  -1  -3  -1 1463.15   57.39
  -1   3   1 1432.66   57.39
  -1   3   1 1410.46   56.99
   1  -3   1 1499.85   57.39
   1  -3   1 1465.05   57.69
   1  -3   1 1438.36   57.39
   1  -3   1 1466.45   57.09
   1   3  -1 1447.46   57.39
  -1  -3  -1 1306.67   57.29
   1   3  -1 1446.76   57.69
  -1   3   1 1475.75   57.69
  -1   3   1 1460.55   57.49
   1   3  -1 1437.56   57.29
   1   3  -1 1341.77   56.89
  -1  -3  -1 1358.36   56.99
   1  -3  -1 1292.67   57.19
   1  -3  -1 1329.07   57.29
  -1   3  -1 1453.05   57.59
   1   3   1 1437.36   57.19
  -1  -3   1 1472.35   57.09
  -1  -3   1 1502.45   57.49
  -1  -3   1 1391.26   57.29
  -1   3  -1 1400.76   57.69
  -1  -3   1 1413.16   57.59
   1   3   1 1392.16   57.19
   1  -3  -1 1439.06   56.99
   1  -3  -1 1441.96   57.29
  -1   3  -1 1419.76   57.49
   1   3   1 1455.15   57.49
   1   3   1 1472.75   57.59
   2  -3   1 2185.18   93.69
   2   3  -1 2238.98   92.99
  -2  -3  -1 2431.16   93.89
   2  -3   1 2337.97   93.09
   2  -3   1 2294.77   93.39
  -2  -3  -1 2332.07   93.89
   2   3  -1 2419.46   93.69
   2  -3   1 2264.67   93.79
  -2   3   1 2286.07   93.79
  -2   3   1 2414.56   93.89
  -2  -3  -1 2246.38   93.09
  -2   3   1 2441.26   93.99
   2  -3   1 2478.75   94.29
  -2  -3  -1 2202.68   93.49
   2   3  -1 2393.86   93.59
  -2  -3   1 2353.36   93.59
   2  -3  -1 2404.76   92.89
   2   3   1 2301.77   93.79
  -2  -3   1 2456.75   93.99
   2  -3  -1 2278.17   93.69
  -2   3  -1 2270.77   93.69
  -2   3  -1 2334.87   94.19
   2  -3  -1 2581.24   94.09
  -2  -3   1 2410.36   93.09
  -2   3  -1 2566.94   94.19
   2   3   1 2300.67   93.19
   2   3   1 2379.36   93.79
   2  -3  -1 2415.56   93.09
  -2  -3   1 2461.05   94.29
   3  -3   1  252.47   12.90
   3  -3   1  236.38   13.30
   3   3  -1  260.97   12.40
  -3  -3  -1  238.88   13.30
  -3   3   1  257.37   12.60
   3   3  -1  250.87   13.10
   3  -3   1  246.18   13.40
  -3  -3  -1  231.58   13.20
  -3   3   1  251.87   13.50
  -3   3   1  252.57   13.70
  -3  -3  -1  251.27   12.50
   3   3  -1  246.98   13.20
  -3   3   1  239.98   13.40
   3  -3  -1  285.17   12.80
  -3  -3   1  267.87   12.30
  -3   3  -1  266.77   13.90
  -3   3  -1  242.08   12.90
   3   3   1  280.07   13.80
  -3   3  -1  264.47   13.60
  -3   3  -1  285.67   13.90
   3   3   1  243.68   12.40
   3  -3  -1  269.67   13.50
   3  -3  -1  257.97   12.10
   3   3   1  235.08   13.20
  -3  -3   1  242.58   13.40
   3  -3  -1  264.47   13.60
  -3  -3   1  273.57   13.50
  -4   3   1  506.25   24.20
  -4   3   1  515.35   24.70
   4   3  -1  509.05   22.40
  -4   3   1  578.54   24.80
  -4  -3  -1  540.85   22.80
   4  -3   1  513.15   24.20
   4   3  -1  508.05   23.80
   4  -3   1  524.55   24.30
  -4   3   1  525.75   23.10
  -4  -3  -1  517.45   24.10
  -4  -3  -1  491.55   24.20
  -4   3  -1  492.65   23.40
   4   3   1  481.75   22.60
  -4  -3   1  503.85   24.20
   4  -3  -1  489.55   22.00
   4   3   1  503.15   24.00
   4  -3  -1  506.65   24.00
  -4   3  -1  509.75   24.70
  -4   3  -1  536.55   24.60
  -4  -3   1  467.45   23.60
  -4   3  -1  501.75   24.20
  -4  -3   1  510.65   22.30
   5  -3   1  819.52   36.90
  -5   3   1  768.72   36.60
   5   3  -1  824.42   36.50
  -5  -3  -1  838.32   34.80
  -5   3   1  892.01   37.80
   5   3  -1  805.32   34.30
  -5   3   1  850.41   35.80
  -5  -3  -1  795.92   36.60
  -5  -3  -1  826.22   37.10
  -5  -3  -1  797.72   37.00
   5  -3  -1  857.81   34.20
   5   3   1  764.12   34.60
  -5   3  -1  802.12   37.70
  -5  -3   1  829.92   36.90
  -5  -3   1  752.82   36.60
  -5  -3   1  803.72   34.30
   5  -3  -1  823.12   36.70
  -5   3  -1  777.62   35.80
  -5   3  -1  870.01   37.60
  -5   3  -1  815.02   37.10
   5   3   1  797.72   36.70
  -5  -3   1  844.82   36.70
   6   3  -1  485.95   24.80
  -6   3   1  546.05   28.60
  -6  -3  -1  482.45   24.90
  -6  -3  -1  500.75   25.70
   6   3  -1  477.05   22.00
   6  -3   1  499.45   25.30
  -6   3   1  481.75   25.30
  -6   3   1  481.05   23.90
  -6  -3   1  438.46   31.50
   6   3   1  526.15   22.80
  -6   3  -1  555.84   27.00
  -6  -3   1  502.45   25.60
   6  -3  -1  451.25   24.70
  -6   3  -1  469.25   24.20
  -6  -3   1  523.55   25.10
  -6   3  -1  477.35   25.40
   6   3   1  505.85   25.30
  -7  -3  -1  243.48   15.30
  -7   3   1  224.38   14.00
  -7   3   1  211.38   15.10
  -7  -3  -1  230.68   15.50
  -7   3  -1  241.88   16.10
   7   3   1  219.08   12.60
  -7  -3   1  240.28   15.30
  -7  -3   1  225.38   15.60
  -7   3  -1  215.38   14.40
  -7   3  -1  255.17   17.10
  -8   3   1   15.80    4.80
  -8  -3  -1   22.20    6.30
  -8   3   1   17.90    6.10
  -8  -3  -1   30.50    6.70
  -8   3  -1   19.40    6.20
  -8   3  -1   23.80    6.80
  -8  -3   1   14.50    5.10
  -8  -3   1   28.40    6.90
  -8   3  -1   17.00    5.10
   0  -4   1  460.85   20.80
   0   4  -1  437.76   20.60
   0   4  -1  441.26   20.80
   0  -4   1  445.46   20.90
   0  -4  -1  479.65   21.00
   0  -4  -1  462.85   21.20
   0  -4   1  444.86   21.00
   0  -4   1  521.05   21.70
   0   4   1  470.85   21.20
   0   4   1  431.66   20.70
   0  -4  -1  455.05   20.70
   0  -4  -1  507.65   21.30
   0   4   1  486.95   21.40
   0   4   1  453.15   20.80
   0   4  -1  458.95   21.10
   0   4  -1  437.76   21.10
  -1   4   1 1587.14   65.29
   1  -4   1 1591.64   65.29
   1   4  -1 1616.94   64.79
  -1   4   1 1629.54   65.09
  -1  -4  -1 1639.34   65.19
   1  -4   1 1547.45   65.19
   1  -4   1 1636.64   65.29
   1   4  -1 1709.93   65.29
  -1  -4  -1 1703.63   65.09
   1   4  -1 1604.84   65.39
  -1   4   1 1538.45   64.59
   1   4  -1 1534.35   64.79
  -1  -4  -1 1578.94   65.29
  -1  -4  -1 1589.44   64.79
  -1   4   1 1644.64   65.29
   1  -4   1 1649.44   64.79
  -1  -4   1 1657.03   65.39
  -1  -4   1 1618.84   65.09
  -1   4  -1 1556.14   64.99
  -1   4  -1 1633.54   65.39
   1   4   1 1601.64   64.99
   1  -4  -1 1531.85   65.09
   1  -4  -1 1510.45   64.89
   1  -4  -1 1652.43   64.69
   1   4   1 1615.04   65.19
  -1  -4   1 1530.15   65.09
   1   4   1 1623.74   65.29
   1  -4  -1 1595.24   64.99
   1   4   1 1583.64   64.89
  -1   4  -1 1610.34   65.39
  -1  -4   1 1639.64   64.69
  -2   4   1  220.68   11.70
   2   4  -1  196.78   11.00
  -2  -4  -1  207.68   10.80
   2   4  -1  209.18   11.30
   2  -4   1  192.78   10.50
  -2   4   1  180.58   11.10
   2   4  -1  211.28   10.90
   2  -4   1  200.98   11.30
  -2  -4  -1  204.58   11.20
   2  -4   1  202.48   11.40
  -2  -4  -1  184.98   11.30
  -2   4   1  181.98   11.00
  -2  -4  -1  194.58   11.00
   2   4   1  190.18   10.80
   2  -4  -1  198.18   12.20
   2  -4  -1  188.38   10.40
  -2  -4   1  196.78   11.20
   2   4   1  202.48   11.30
   2  -4  -1  197.88   10.40
  -2   4  -1  197.48   11.40
  -2   4  -1  201.88   11.30
   2   4   1  191.58   11.20
   2  -4  -1  186.08   10.90
  -2   4  -1  213.28   11.40
   2  -4  -1  199.88   11.10
  -2  -4   1  202.48   10.70
  -2  -4   1  204.58   11.20
  -3   4   1  749.82   33.10
   3   4  -1  707.93   31.50
  -3   4   1  746.43   33.00
   3  -4   1  728.13   32.70
  -3  -4  -1  717.33   32.60
   3   4  -1  749.23   32.50
   3  -4   1  734.73   32.80
  -3  -4  -1  784.52   32.00
  -3   4   1  736.73   32.70
   3  -4   1  743.63   31.70
  -3  -4  -1  727.23   32.80
   3   4   1  759.12   32.90
  -3  -4   1  703.93   32.60
   3  -4  -1  746.83   31.50
  -3   4  -1  722.13   32.70
   3   4   1  695.43   31.70
  -3  -4   1  726.93   32.50
  -3  -4   1  763.92   31.60
   3   4   1  755.02   32.70
   3  -4  -1  698.73   32.50
   3  -4  -1  784.12   32.90
  -3   4  -1  696.43   33.00
  -3   4  -1  755.52   33.10
  -4  -4  -1  251.57   15.10
  -4   4   1  279.37   15.50
  -4  -4  -1  289.57   15.40
  -4   4   1  259.77   15.20
   4   4  -1  256.67   13.50
  -4   4   1  272.87   14.10
  -4   4   1  254.97   14.80
   4  -4   1  230.08   14.60
   4   4  -1  256.07   14.60
  -4  -4   1  294.17   15.30
   4   4   1  260.77   13.80
  -4  -4   1  265.37   15.10
   4   4   1  260.97   14.70
  -4   4  -1  282.77   15.40
  -4   4  -1  290.37   15.40
  -4   4  -1  281.67   15.90
  -4   4  -1  233.68   14.20
   4  -4  -1  263.67   14.80
   4  -4  -1  269.77   13.40
  -4  -4   1  283.57   13.70
  -5   4   1  142.29   11.00
   5   4  -1  154.38    9.30
  -5  -4  -1  141.89   11.00
   5   4  -1  159.38   10.90
  -5  -4  -1  149.88   11.00
  -5   4   1  165.88   12.00
  -5   4   1  166.78   11.70
  -5   4   1  150.68   10.00
  -5  -4  -1  173.98   11.50
  -5  -4   1  138.69   10.60
  -5   4  -1  136.49   10.10
   5   4   1  147.99    9.40
  -5   4  -1  137.69   11.40
  -5  -4   1  149.79   11.20
  -5   4  -1  157.58   11.50
   5  -4  -1  161.78    9.20
   5   4   1  137.69   10.70
  -6   4   1  139.19   11.30
   6  -4   1  150.78   11.40
   6   4  -1  132.29    8.70
  -6   4   1  150.08   10.20
  -6   4   1  129.29   11.60
  -6  -4  -1  154.28   11.90
  -6  -4  -1  141.89   10.70
  -6   4  -1  128.19   12.90
   6   4   1  132.49   10.90
  -6  -4   1  131.79   10.40
  -6  -4   1  145.59   11.60
  -6   4  -1  144.39   10.50
   6   4   1  142.39    9.20
   6  -4  -1  124.19   10.60
  -6   4  -1  134.29   11.20
  -7   4   1  161.18   13.30
  -7   4   1  182.18   12.20
  -7  -4  -1  165.88   13.40
  -7  -4  -1  150.48   12.40
  -7   4   1  179.58   14.20
  -7  -4   1  156.68   13.20
  -7  -4   1  160.28   12.60
  -7   4  -1  153.58   13.10
   7   4   1  163.48   11.70
  -7   4  -1  151.68   11.90
  -7   4  -1  184.58   14.70
  -8   4   1   27.60    6.00
  -8   4   1   26.10    7.30
  -8   4   1   17.20    6.10
  -8  -4  -1   38.40    8.30
  -8  -4  -1   27.80    6.90
  -8  -4   1   29.30    7.30
  -8  -4   1   31.10    6.90
  -8   4  -1   27.20    8.10
  -8   4  -1   30.40    8.10
  -8   4  -1   26.70    6.40
   0  -5   1   75.89    6.40
   0   5   1   77.39    6.40
   0   5  -1   59.49    6.50
   0   5  -1   88.19    6.40
   0   5   1   73.49    6.20
   0   5  -1   63.19    6.50
   0   5   1   72.19    7.00
   0   5   1   66.59    6.50
   0  -5   1   74.59    6.30
   0  -5  -1   63.09    6.50
   0  -5  -1   66.79    6.70
   1   5  -1  137.69    9.20
  -1   5   1  157.08   10.00
   1   5  -1  152.18    9.60
  -1   5   1  151.98    9.60
  -1  -5  -1  131.79    9.20
   1  -5   1  164.28    9.70
  -1  -5  -1  128.09    9.40
   1   5  -1  135.79    9.60
   1   5  -1  133.59    9.00
  -1   5   1  139.19    9.20
  -1   5   1  148.29    9.70
   1  -5   1  156.68    9.90
   1   5   1  161.18    9.70
  -1   5  -1  153.88    9.90
   1   5   1  170.48   10.00
  -1  -5   1  155.08    9.50
  -1   5  -1  147.09    9.60
   1   5   1  156.98    9.60
   1   5   1  162.28    9.60
  -1   5  -1  134.69    9.40
  -1  -5   1  136.99    9.30
   1  -5  -1  154.18    9.50
   1  -5  -1  158.88    9.70
   2   5  -1  182.48   11.10
  -2   5   1  187.98   11.40
  -2  -5  -1  169.88   11.20
   2  -5   1  173.58   11.20
  -2  -5  -1  179.88   11.00
   2   5  -1  192.78   10.70
   2  -5   1  204.28   11.60
  -2   5   1  160.18   11.00
  -2   5   1  184.78   11.20
   2  -5  -1  180.98   11.10
  -2   5  -1  178.18   11.40
   2   5   1  181.68   10.70
   2   5   1  188.68   11.30
  -2   5  -1  173.58   11.20
   2  -5  -1  187.18   11.30
  -2  -5   1  179.48   11.30
   2   5   1  183.88   11.40
  -2   5  -1  165.78   10.90
  -2  -5   1  189.28   11.30
   3  -5   1  111.89    8.60
  -3  -5  -1  103.49    8.60
   3   5  -1  109.99    7.90
   3  -5   1   94.09    8.10
  -3   5   1   99.89    8.10
  -3   5   1  106.19    8.40
  -3  -5  -1   95.79    8.00
   3   5  -1  100.79    7.50
  -3   5   1  101.19    8.40
  -3  -5   1   90.69    7.80
  -3   5  -1   95.99    8.10
   3  -5  -1   96.89    8.10
   3   5   1   95.19    7.50
   3   5   1  106.39    8.30
  -3  -5   1  101.59    8.00
  -3   5  -1  102.29    8.40
   4   5  -1  261.27   14.80
  -4   5   1  289.57   16.90
  -4  -5  -1  283.77   16.60
  -4   5   1  285.17   16.60
   4  -5   1  268.27   16.20
   4   5  -1  284.37   15.90
  -4   5   1  288.37   16.80
  -4  -5  -1  306.27   16.70
  -4   5  -1  277.07   16.40
  -4  -5   1  285.57   16.50
   4   5   1  286.87   16.40
   4  -5  -1  299.27   16.50
   4   5   1  303.17   15.60
  -4  -5   1  283.77   16.20
  -5   5   1  366.16   21.30
   5   5  -1  372.36   20.40
  -5  -5  -1  378.66   21.20
   5   5  -1  366.96   18.70
  -5   5   1  371.26   21.00
   5  -5   1  344.97   20.50
   5  -5  -1  419.16   21.30
   5   5   1  377.86   20.70
  -5   5  -1  418.06   22.30
  -5  -5   1  394.56   21.10
   5   5   1  377.06   19.20
  -5   5  -1  365.96   20.90
  -6   5   1  193.08   14.00
   6  -5   1  157.08   12.80
   6   5  -1  179.48   11.30
  -6   5   1  167.88   13.80
  -6  -5  -1  199.88   13.80
  -6  -5  -1  196.78   14.20
  -6  -5   1  166.78   13.30
   6   5   1  180.58   11.50
  -6   5  -1  186.58   14.50
  -6   5  -1  187.28   12.70
  -6   5  -1  172.38   13.40
  -6  -5   1  193.18   13.50
  -7   5   1   15.60    5.90
  -7   5   1   11.20    4.00
  -7  -5  -1   10.10    4.70
  -7  -5  -1   12.30    5.10
  -7   5   1    7.10    4.60
  -7   5  -1    6.00    4.00
  -7   5  -1    6.80    4.40
  -7  -5   1    6.50    4.20
  -7  -5   1   11.50    5.00
  -7   5  -1    8.80    5.10
   0  -6  -1 2905.91  115.89
   0   6  -1 2732.63  115.99
   0   6   1 3082.89  116.19
   0  -6  -1 2840.02  115.99
   0   6   1 2930.81  115.79
   0  -6   1 2843.62  115.79
   0  -6   1 2898.31  116.09
   0   6   1 2873.01  115.69
   0   6  -1 2831.02  115.59
   1  -6   1  318.87   17.00
  -1  -6  -1  301.77   16.50
  -1   6   1  333.97   17.10
   1  -6   1  320.67   16.70
  -1   6   1  328.27   18.80
  -1   6   1  289.77   16.20
   1   6  -1  278.97   16.60
   1   6  -1  319.37   16.60
  -1  -6  -1  307.57   16.60
   1   6  -1  304.17   16.20
  -1  -6   1  306.17   16.70
   1  -6  -1  300.77   16.70
   1   6   1  296.67   16.50
   1   6   1  293.37   16.40
   1   6   1  295.17   16.30
  -1   6  -1  288.07   16.50
  -1  -6   1  302.87   16.50
  -1   6  -1  295.67   16.50
  -2   6   1   68.19    7.70
   2   6  -1   62.09    7.30
   2   6  -1   70.69    7.40
   2  -6   1   78.49    8.20
  -2  -6  -1   87.89    8.60
  -2  -6  -1   78.99    8.40
  -2   6   1   76.79    8.10
  -2   6  -1   69.99    7.90
  -2  -6   1   73.79    8.10
  -2  -6   1   98.49    8.00
   2   6   1   81.99    7.80
   2   6   1   80.89    8.20
  -2   6  -1   83.89    8.40
   2  -6  -1   79.29    8.10
  -3  -6  -1   24.30    5.20
  -3   6   1   31.90    5.70
  -3   6   1   24.30    4.80
   3  -6   1   25.00    5.20
   3   6  -1   28.50    4.70
   3   6  -1   26.50    5.10
   3   6   1   28.90    5.10
   3   6   1   16.80    4.50
  -3  -6   1   24.90    5.10
  -3  -6   1   27.00    5.30
  -3   6  -1   29.70    5.60
   3  -6  -1   27.30    5.30
  -3   6  -1   29.90    5.40
  -4   6   1  130.79   10.60
   4   6  -1  125.99    9.40
  -4   6   1  126.89   10.90
   4  -6   1  129.69   10.60
  -4  -6  -1  129.19   10.80
   4   6  -1  125.59   10.00
  -4  -6   1  146.69   15.40
  -4   6  -1  131.79   10.30
  -4  -6   1  135.19   10.50
   4  -6  -1  110.19   11.00
   4   6   1  133.09   10.50
   4   6   1  110.89   10.30
  -4   6  -1  133.69   11.30
  -5   6   1   55.49    8.00
  -5   6   1   38.10    7.30
   5  -6   1   46.70    7.10
  -5  -6  -1   34.70    6.70
   5   6  -1   44.50    6.10
  -5   6  -1   40.50    7.40
  -5   6  -1   41.30    7.30
   5   6   1   41.70    6.20
  -5  -6   1   45.20    7.50
   5  -6  -1   39.50    6.90
   6   6  -1   18.00    4.60
  -6   6   1   14.60    5.70
  -6  -6  -1   18.20    5.70
  -6  -6  -1   30.60    6.70
  -6   6   1   17.10    5.70
  -6  -6   1   25.60    6.50
  -6   6  -1   17.00    6.00
   6   6   1   22.20    4.80
  -6   6  -1   22.10    6.60
  -7  -6  -1   59.89    9.70
  -7  -6  -1   55.19    9.10
  -7   6   1   64.49   10.30
  -7   6   1   48.80    8.90
  -7   6  -1   53.49   10.10
  -7  -6   1   54.69    8.50
  -7  -6   1   40.10    8.40
   0   7  -1  224.88   14.70
   0   7   1  236.38   14.70
   0   7   1  242.48   14.40
   0   7   1  228.38   14.40
   0  -7  -1  233.48   14.70
   0  -7   1  240.08   14.90
   0   7  -1  245.98   14.70
  -1  -7  -1  450.25   24.60
   1   7  -1  445.26   24.20
   1  -7   1  495.05   25.10
   1   7  -1  497.85   25.20
  -1   7   1  455.15   24.40
  -1   7   1  453.45   24.30
   1   7   1  503.25   24.60
   1  -7  -1  488.85   25.00
  -1   7  -1  516.35   25.30
   1   7   1  489.25   24.70
  -1   7  -1  539.55   25.30
  -1  -7   1  579.94   27.80
  -1  -7   1  488.65   24.90
   1   7   1  496.85   24.90
   2  -7   1  240.78   15.00
   2   7  -1  227.38   14.70
  -2   7   1  238.78   15.10
  -2   7   1  242.58   15.40
   2   7  -1  258.07   15.10
  -2  -7  -1  242.38   15.40
  -2   7  -1  238.78   15.10
   2   7   1  259.67   15.10
  -2   7  -1  238.48   15.40
   2  -7  -1  215.48   14.70
  -2  -7   1  240.78   15.30
   2   7   1  271.17   15.10
   3   7  -1   30.70    5.80
  -3  -7  -1   30.90    6.20
  -3   7   1   29.90    6.00
   3   7  -1   27.00    5.50
   3  -7   1   33.10    6.10
  -3   7   1   30.90    6.00
   3   7   1   29.90    5.60
   3   7   1   27.70    5.20
  -3   7  -1   23.40    5.40
   3  -7  -1   34.50    6.40
  -3   7  -1   40.00    6.90
  -3  -7   1   40.20    6.70
  -4   7   1   25.40    6.20
   4   7  -1   32.20    5.70
  -4   7   1   36.50    6.90
  -4  -7  -1   23.60    5.70
   4  -7   1   30.20    6.30
  -4  -7   1   28.70    6.30
  -4   7  -1   37.70    6.80
   4  -7  -1   27.00    6.00
   4   7   1   41.50    6.50
  -4   7  -1   34.70    7.00
  -5   7   1  125.89   13.40
  -5   7   1  133.39   13.30
  -5  -7  -1  139.99   13.60
   5   7  -1  128.69   10.30
  -5   7  -1  148.19   14.00
  -5   7  -1  145.79   14.50
  -5  -7   1  113.69   12.70
   5   7   1  125.49   10.50
  -6   7   1  360.66   23.20
  -6   7   1  384.46   23.10
  -6  -7  -1  375.36   23.40
   6   7  -1  359.76   20.40
  -6   7  -1  364.36   23.60
  -6  -7   1  365.66   23.10
   6   7   1  362.56   20.50
   0   8   1  203.48   13.90
   0   8  -1  186.88   13.70
   0   8  -1  205.98   13.90
   0  -8   1  182.08   13.30
   0   8   1  186.38   13.40
   0  -8  -1  197.18   14.00
   1  -8   1   51.69    7.60
  -1   8   1   45.40    7.10
   1   8  -1   38.90    7.10
   1   8  -1   52.19    7.50
  -1  -8  -1   57.79    7.90
  -1   8   1   44.90    6.90
   1   8   1   59.69    7.80
  -1   8  -1   44.20    7.10
   1   8   1   30.10    6.40
   1  -8  -1   37.90    6.80
  -1  -8   1   39.70    6.70
   1   8   1   34.20    6.50
  -1   8  -1   30.30    6.40
  -2  -8  -1   87.29   10.10
   2  -8   1   79.09    9.60
  -2   8   1   63.89    8.60
  -2   8   1   70.39    9.20
   2  -8  -1   85.89    9.80
  -2  -8   1   70.29    9.10
   2   8   1   77.99    9.50
  -2   8  -1   66.29    8.80
   2   8   1   75.29    8.90
  -2   8  -1   70.19    9.40
  -3  -8  -1  146.89   12.30
  -3   8   1  134.69   11.60
  -3   8   1  147.99   12.00
   3  -8   1  124.49   12.60
   3   8  -1  148.19   11.50
  -3   8  -1  124.59   12.60
  -3  -8   1  123.49   12.50
   3  -8  -1  129.19   12.90
   3   8   1  133.19   10.80
  -3   8  -1  130.49   13.20
  -4   8   1   45.40    8.30
   4   8  -1   48.20    7.60
  -4  -8  -1   43.60    8.00
  -4   8   1   51.79    8.30
  -4   8  -1   59.09    9.20
   4   8   1   51.39    7.60
  -4  -8   1   55.29    8.90
  -5  -8  -1   76.59   10.80
   5   8  -1   74.79    9.30
  -5   8   1   80.99   10.80
   5   8   1   71.49    9.00
  -5  -8   1   71.89   10.60
  -5   8  -1   71.89   10.70
   0   9   1   29.80    6.40
   0  -9   1   31.90    6.90
   0  -9  -1   41.40    7.50
   0   9  -1   40.40    7.30
  -1   9   1  107.29   11.50
  -1  -9  -1  104.49   11.80
   1   9  -1   88.69   11.00
   1  -9   1   93.49   11.20
  -1  -9   1   97.89   11.30
   1  -9  -1  102.69   11.50
  -1   9  -1   83.39   10.70
   1   9   1   79.59   10.10
  -2  -9  -1   15.10    5.10
   2  -9   1   21.30    6.10
  -2   9   1   18.40    5.80
  -2  -9   1   24.30    6.50
   2   9   1   27.90    6.40
  -2   9  -1   25.40    6.60
  -3   9   1   11.40    4.90
  -3  -9  -1   22.30    6.30
  -3   9  -1   11.70    4.80
  -3  -9   1   17.00    5.30
   3   9   1   11.60    4.90
  -4   9   1  249.58   18.20
  -4  -9  -1  254.17   28.10
   4   9   1  253.07   17.20
  -4   9  -1  273.17   19.10
  -4  -9   1  270.17   18.50
   0 -10   1  273.47   22.00
   0  10  -1  299.77   19.60
   0  10   1  237.68   17.80
   1  10  -1  157.68   15.70
  -1  10   1  142.39   14.60
  -1  10  -1  162.58   16.00
  -1 -10   1  144.59   14.90
   1  10   1  165.68   13.90
  -2  10   1   84.39   11.00
  -2  10  -1   57.99    9.70
  -2 -10   1   73.69   10.70
   1   0   2 4212.18  160.58
  -1   0  -2 4192.88  160.38
   1   0  -2 4151.38  160.28
  -1   0  -2 4128.99  160.08
   1   0   2 4124.49  160.38
   1   0   2 4301.27  160.78
   1   0  -2 3963.00  160.18
  -1   0   2 4111.49  159.98
  -1   0   2 4031.10  160.78
  -1   0  -2 4199.38  160.68
   2   0   2    9.70    1.90
  -2   0   2    6.90    1.60
   2   0  -2    6.40    1.50
  -2   0  -2    9.50    1.80
   2   0   2    7.30    1.90
  -2   0   2    7.00    1.60
   2   0   2    6.40    1.80
  -2   0  -2    5.40    1.80
  -2   0  -2    8.20    1.70
  -2   0   2    8.20    1.40
   2   0  -2    2.50    1.10
   3   0  -2   23.00    3.10
  -3   0  -2   24.80    3.40
   3   0  -2   20.80    2.80
  -3   0   2   21.90    3.10
   3   0   2   24.10    3.40
  -3   0   2   22.50    2.80
  -3   0  -2   23.60    3.30
   3   0  -2   24.30    1.50
   3   0   2   23.90    2.70
   3   0   2   19.50    3.20
  -3   0  -2   25.60    3.40
   3   0   2   23.50    3.30
  -3   0   2   21.70    3.00
   4   0  -2  125.69    7.70
   4   0  -2  103.89    5.20
   4   0  -2  118.99    7.60
  -4   0  -2  114.39    7.80
   4   0   2  119.29    8.00
   4   0   2  109.39    6.50
  -4   0   2  114.59    7.20
  -4   0  -2  140.49    8.50
   4   0   2  110.29    7.70
  -4   0  -2  117.19    8.00
  -4   0   2  124.59    8.00
  -4   0   2  129.99    8.00
  -5   0   2   87.99    7.40
  -5   0  -2   86.19    7.20
  -5   0  -2   97.89    7.80
   5   0   2   85.39    5.80
   5   0  -2   83.59    4.40
   5   0  -2   86.09    7.00
  -5   0   2   88.49    6.60
   5   0   2   76.89    7.80
  -5   0  -2   98.69    7.90
  -5   0   2   95.09    7.50
   6   0  -2   80.19    4.40
  -6   0  -2   95.79    9.10
  -6   0   2   92.89    7.50
   6   0  -2   78.89    8.30
   6   0   2   94.09    9.20
  -6   0  -2   97.19    9.60
   6   0   2   93.79    6.20
  -6   0   2   80.19    8.60
  -7   0  -2   70.79    8.70
   7   0   2   64.99    6.00
   7   0   2   82.19    9.40
  -7   0   2   93.19   10.10
  -7   0   2   63.39    7.50
  -7   0  -2   81.19    9.00
  -8   0   2   16.40    5.50
  -8   0  -2   18.20    5.40
  -8   0   2   21.10    5.10
  -8   0  -2   20.50    5.70
  -9   0   2  552.14   30.20
  -9   0  -2  542.15   29.00
  -9   0   2  506.75   27.60
   0  -1   2 2017.40   80.19
   0   1  -2 2107.29   80.59
   0   1   2 2060.99   80.19
   0   1  -2 2154.58   80.19
   0  -1  -2 1998.60   80.19
   0   1   2 2099.09   80.39
   0   1   2 2035.90   80.29
   0  -1  -2 2099.19   80.39
   0  -1   2 2037.90   80.19
   0  -1   2 2107.59   80.59
   0  -1  -2 2107.69   80.09
   0   1   2 2017.20   80.19
  -1  -1  -2   60.39    3.80
  -1  -1  -2   56.89    3.90
  -1  -1  -2   59.09    3.70
   1  -1   2   59.89    3.90
  -1   1   2   57.49    3.30
   1   1  -2   66.09    3.60
  -1   1   2   61.99    3.80
   1  -1   2   60.89    4.00
   1  -1   2   70.99    4.30
  -1   1   2   56.49    3.70
   1  -1   2   59.89    3.90
  -1   1  -2   57.69    4.10
   1   1   2   56.99    3.90
   1  -1  -2   48.70    3.50
  -1   1  -2   56.69    3.80
  -1   1  -2   73.09    4.20
   1  -1  -2   65.49    3.20
   1   1   2   57.69    3.70
  -1   1  -2   58.49    3.80
  -1  -1   2   59.99    3.30
  -1  -1   2   52.49    3.40
  -1  -1   2   57.69    3.60
  -1  -1   2   61.49    4.20
   1   1   2   58.49    3.90
   1  -1  -2   58.39    3.30
  -2  -1  -2 3019.20  118.59
  -2  -1  -2 3117.49  117.99
   2  -1   2 3186.38  118.59
   2   1  -2 3070.59  117.09
  -2  -1  -2 3163.68  118.59
  -2   1   2 2571.14  118.09
  -2   1   2 3039.00  118.29
   2   1  -2 3034.20  118.09
   2  -1   2 2950.40  118.49
  -2   1   2 2870.41  117.49
  -2  -1  -2 3011.70  118.59
   2   1   2 3215.78  118.69
   2  -1  -2 2996.50  118.19
  -2  -1   2 2955.70  118.19
   2   1   2 2946.51  117.89
   2   1   2 2981.20  118.49
  -2  -1   2 2870.71  117.09
  -2   1  -2 3140.89  118.59
   2  -1  -2 3041.20  116.99
  -2  -1   2 2921.71  118.19
   2  -1  -2 3111.19  117.59
  -2   1  -2 3180.08  118.69
   2  -1  -2 3167.88  118.19
  -2   1  -2 3255.27  118.69
  -3  -1  -2  308.47   14.00
   3   1  -2  309.67   13.00
  -3  -1  -2  346.07   15.40
  -3   1   2  354.86   15.20
  -3  -1  -2  295.57   14.80
  -3   1   2  325.27   14.10
  -3   1   2  301.27   14.70
   3  -1   2  320.67   14.80
  -3  -1  -2  306.97   15.00
   3  -1   2  306.07   15.00
   3   1  -2  301.87   14.50
   3   1  -2  319.87   14.60
   3  -1   2  316.37   15.10
  -3   1  -2  307.27   14.90
   3   1   2  315.17   15.00
  -3   1  -2  290.57   14.70
  -3  -1   2  312.47   13.00
   3   1   2  274.57   13.80
   3  -1  -2  306.87   14.60
   3  -1  -2  300.17   12.80
   3  -1  -2  336.57   14.10
   3  -1  -2  309.77   14.70
  -3  -1   2  326.17   14.80
  -3  -1   2  302.97   14.70
  -3   1  -2  318.37   15.10
  -3  -1   2  294.97   14.30
   3   1   2  311.07   15.00
  -4   1   2  720.63   31.30
   4  -1   2  751.52   31.60
  -4   1   2  733.23   30.20
   4  -1   2  720.13   31.30
  -4   1   2  682.03   31.00
   4   1  -2  775.42   31.20
   4   1  -2  726.03   30.90
   4   1  -2  679.83   28.40
  -4  -1  -2  708.43   31.20
  -4  -1  -2  713.93   31.40
  -4  -1  -2  725.43   31.40
   4   1   2  710.83   31.30
   4   1   2  699.83   29.60
   4  -1  -2  700.83   30.00
  -4  -1   2  698.03   30.50
   4  -1  -2  666.33   30.60
  -4  -1   2  714.53   31.10
  -4   1  -2  657.83   31.20
   4   1   2  710.13   31.30
  -4  -1   2  710.73   31.10
  -4   1  -2  691.83   31.20
   4  -1  -2  739.83   31.00
  -4   1  -2  700.73   30.90
  -5   1   2  256.77   14.60
  -5  -1  -2  234.38   14.40
   5  -1   2  248.58   14.60
   5   1  -2  249.18   11.30
  -5  -1  -2  267.77   14.90
  -5   1   2  244.78   14.50
  -5   1   2  266.37   13.70
   5   1  -2  239.98   14.00
  -5  -1  -2  248.38   14.40
   5  -1  -2  286.47   11.40
   5  -1  -2  244.38   14.10
  -5   1  -2  302.87   15.50
  -5   1  -2  244.58   14.10
  -5  -1   2  262.27   14.00
   5   1   2  287.77   13.00
   5   1   2  262.27   14.80
  -5  -1   2  283.67   14.90
  -5   1  -2  268.57   14.90
  -5  -1   2  240.98   14.10
  -6   1   2  260.17   14.20
  -6   1   2  268.37   15.70
   6   1  -2  253.97   11.20
   6  -1   2  251.77   15.40
   6   1  -2  271.87   15.10
  -6  -1  -2  246.68   14.90
  -6  -1  -2  276.27   15.90
  -6   1   2  265.17   15.50
   6  -1  -2  268.77   15.10
  -6  -1   2  248.88   15.10
  -6  -1   2  234.48   15.00
   6   1   2  257.37   12.90
   6  -1  -2  251.27   11.10
  -6  -1   2  246.88   14.40
  -6   1  -2  232.18   15.20
   6   1   2  251.37   15.30
  -6   1  -2  252.27   14.90
  -7   1   2    7.00    3.40
  -7  -1  -2    7.40    3.90
  -7  -1  -2    9.50    4.10
   7  -1   2    6.00    3.20
   7  -1   2    6.20    2.50
  -7   1   2    7.10    3.60
  -7   1  -2    5.20    3.90
   7   1   2    7.90    2.60
  -7  -1   2    6.30    3.40
  -7  -1   2   11.90    4.40
   7   1   2    9.20    4.00
  -7   1  -2   10.50    4.10
  -8   1   2  167.28   12.30
  -8  -1  -2  163.98   13.80
  -8   1   2  163.18   13.50
  -8  -1  -2  174.48   13.30
  -8  -1   2  173.58   13.70
  -8   1  -2  177.18   14.00
  -8   1  -2  173.28   13.00
  -8  -1   2  162.48   12.50
  -9   1   2    7.20    5.20
  -9  -1   2    9.80    4.70
   0  -2   2    6.70    1.70
   0   2   2    9.00    1.90
   0  -2   2    5.00    1.80
   0   2  -2    7.90    1.60
   0  -2  -2    9.30    1.70
   0   2  -2    4.40    1.80
   0  -2  -2    9.90    1.80
   0  -2  -2    6.70    1.50
   0   2   2    9.70    1.80
   0  -2   2    6.20    1.60
   0  -2  -2    5.20    1.70
   0   2   2    8.90    1.70
   0   2   2    6.40    1.50
   0  -2   2    5.80    1.70
   0   2  -2    9.80    1.80
  -1   2   2  608.94   25.80
   1  -2   2  619.34   25.90
  -1  -2  -2  662.53   26.00
  -1   2   2  615.84   25.40
  -1   2   2  574.34   25.80
  -1  -2  -2  650.33   25.60
  -1  -2  -2  649.83   25.80
  -1   2   2  604.94   25.60
   1   2  -2  594.94   26.10
   1  -2   2  680.83   26.40
   1   2  -2  597.64   25.40
   1  -2   2  668.63   26.00
   1  -2   2  602.44   25.90
  -1  -2  -2  639.34   26.10
   1   2  -2  662.73   25.80
   1   2  -2  583.74   25.50
  -1   2  -2  618.64   26.30
  -1  -2   2  622.24   25.70
   1   2   2  616.14   26.00
  -1  -2   2  655.23   25.50
   1   2   2  587.04   25.70
  -1   2  -2  628.54   25.90
   1   2   2  602.34   25.90
  -1   2  -2  592.64   25.80
   1  -2  -2  630.74   25.60
  -1  -2   2  634.64   25.70
  -1   2  -2  618.54   25.80
   1  -2  -2  593.64   25.70
  -1  -2   2  642.74   26.30
   1  -2  -2  613.74   25.70
   1  -2  -2  624.34   25.40
   2   2  -2  684.13   27.50
   2  -2   2  700.83   27.90
  -2  -2  -2  640.04   27.90
  -2  -2  -2  669.63   27.90
  -2  -2  -2  665.73   27.40
  -2   2   2  675.23   26.90
   2  -2   2  686.33   27.70
  -2   2   2  693.23   27.90
   2  -2   2  668.43   27.90
   2   2  -2  668.73   26.80
  -2   2   2  660.83   27.70
   2   2  -2  671.63   27.50
  -2  -2   2  669.43   26.80
  -2  -2   2  658.03   27.60
  -2   2  -2  612.14   28.00
   2  -2  -2  649.04   27.60
   2  -2  -2  663.33   26.70
   2   2   2  620.94   27.30
   2   2   2  611.24   27.70
   2  -2  -2  671.43   26.90
  -2   2  -2  623.74   27.70
   2  -2  -2  636.34   27.60
  -2  -2   2  665.03   27.50
  -2   2  -2  614.34   27.50
   2   2   2  666.03   28.00
  -2   2  -2  622.84   27.80
  -3   2   2  289.47   14.00
   3   2  -2  279.17   12.30
  -3  -2  -2  250.37   13.70
  -3  -2  -2  301.87   13.20
  -3   2   2  284.47   12.90
   3   2  -2  279.57   13.50
  -3   2   2  266.47   13.70
   3  -2   2  285.07   14.20
   3  -2   2  291.77   14.10
   3  -2   2  275.47   13.70
  -3  -2  -2  281.57   14.00
  -3  -2  -2  290.27   14.10
   3   2  -2  266.67   13.40
  -3  -2   2  281.37   13.70
   3   2   2  262.37   13.80
   3   2   2  258.07   12.90
   3  -2  -2  274.77   12.80
  -3   2  -2  261.27   14.20
  -3   2  -2  268.07   13.60
   3   2   2  279.27   14.00
  -3   2  -2  306.27   14.30
   3  -2  -2  294.37   13.70
  -3  -2   2  302.47   12.50
   3  -2  -2  266.87   12.10
  -3   2  -2  255.77   13.80
  -3  -2   2  255.57   13.50
  -4  -2  -2  451.45   21.40
   4  -2   2  444.76   21.50
  -4   2   2  479.35   21.80
  -4   2   2  450.75   21.50
   4   2  -2  442.06   20.90
  -4   2   2  436.76   20.10
   4  -2   2  486.75   21.70
  -4  -2  -2  462.85   21.60
  -4  -2  -2  475.35   20.20
   4   2  -2  450.65   19.20
  -4  -2  -2  411.46   21.30
   4  -2  -2  444.76   20.20
  -4  -2   2  448.86   19.10
   4  -2  -2  447.26   18.90
  -4  -2   2  425.96   20.80
  -4  -2   2  460.15   21.40
   4   2   2  453.95   21.50
  -4   2  -2  432.96   21.40
  -4  -2   2  451.35   21.30
   4  -2  -2  441.76   21.10
  -4   2  -2  415.76   20.90
   4   2   2  461.45   20.10
   4   2   2  462.65   21.70
  -4   2  -2  469.55   21.90
  -5  -2  -2  142.19    9.80
  -5  -2  -2  135.69    9.50
  -5   2   2  115.19    9.10
  -5   2   2  147.79    9.80
  -5  -2  -2  112.49    8.90
   5   2  -2  112.79    6.60
   5   2  -2  104.19    8.30
  -5   2   2  128.09    8.30
   5  -2   2  136.49    9.50
  -5  -2   2  109.29    8.90
   5   2   2  120.79    7.50
  -5  -2   2  111.19    8.40
  -5  -2   2  137.29    6.90
   5   2   2  120.49    8.90
  -5   2  -2  118.09    9.10
  -5   2  -2  138.99    9.20
  -5  -2   2  130.59    9.20
  -5   2  -2  112.99    9.10
   5  -2  -2  132.69    9.10
   5  -2  -2  121.19    6.50
   6  -2   2   75.29    8.80
  -6   2   2   85.39    7.20
  -6  -2  -2   73.89    8.70
  -6   2   2   92.49    9.90
   6   2  -2   72.29    8.10
  -6   2   2   79.39    8.70
   6   2  -2   81.69    5.30
  -6  -2  -2   76.19    8.40
   6   2   2  103.89    6.80
  -6  -2   2   87.59    9.30
   6  -2  -2   91.99    9.10
  -6  -2   2   82.69    8.50
  -6   2  -2   89.09    8.90
   6   2   2  106.39    8.90
  -6   2  -2  111.69    9.30
  -6  -2   2  102.09    9.90
  -7   2   2   33.60    5.60
   7  -2   2   46.00    5.10
  -7   2   2   51.29    7.90
  -7  -2  -2   56.19    7.60
   7  -2   2   60.79    8.20
  -7  -2  -2   57.99    8.10
  -7   2  -2   47.80    7.60
  -7  -2   2   49.80    7.70
   7   2   2   47.60    7.70
  -7  -2   2   50.19    7.10
   7   2   2   49.70    5.50
  -7   2  -2   54.69    7.60
  -8  -2  -2   35.00    7.20
  -8   2   2   45.50    8.10
  -8  -2  -2   26.50    6.40
  -8   2   2   40.30    6.70
  -8   2  -2   33.70    7.60
  -8  -2   2   44.30    8.00
  -8   2  -2   47.90    7.70
  -8  -2   2   33.80    6.60
   0  -3   2   32.00    3.50
   0   3   2   33.70    3.60
   0  -3  -2   32.30    3.30
   0   3  -2   25.50    3.30
   0  -3   2   32.90    3.50
   0   3   2   35.20    3.20
   0   3  -2   30.50    3.50
   0   3   2   32.20    3.70
   0  -3  -2   30.70    3.50
   0  -3   2   28.50    3.50
   0  -3   2   30.90    3.90
   0   3  -2   23.40    3.50
   0   3   2   23.60    3.10
   0  -3  -2   31.90    3.60
   0  -3  -2   29.40    3.50
  -1   3   2  327.97   15.20
  -1  -3  -2  341.07   15.30
  -1  -3  -2  367.56   15.80
  -1   3   2  309.87   15.40
   1   3  -2  349.37   15.50
   1   3  -2  343.07   15.30
   1  -3   2  345.27   15.60
   1   3  -2  348.37   15.20
  -1  -3  -2  366.86   15.30
  -1   3   2  361.96   15.80
  -1   3   2  332.67   15.10
   1   3  -2  302.57   15.70
   1  -3   2  337.07   15.50
   1  -3   2  315.77   15.10
  -1  -3  -2  330.57   15.60
   1  -3   2  361.96   16.00
   1  -3   2  299.57   15.40
  -1  -3   2  342.67   15.90
   1  -3  -2  335.07   15.40
   1  -3  -2  335.97   15.20
   1   3   2  323.17   15.40
  -1  -3   2  342.87   15.50
  -1  -3   2  336.77   15.10
  -1  -3   2  334.07   15.30
   1  -3  -2  347.97   15.20
  -1   3  -2  286.17   15.50
  -1   3  -2  301.37   15.20
   1   3   2  333.97   15.60
   1  -3  -2  323.67   15.40
   1   3   2  340.27   15.70
   1   3   2  328.77   15.10
  -1   3  -2  336.77   15.60
   2   3  -2 1521.55   62.29
   2  -3   2 1546.45   62.79
  -2  -3  -2 1462.55   62.59
   2  -3   2 1637.94   62.69
  -2   3   2 1470.55   62.49
  -2  -3  -2 1653.53   62.89
   2  -3   2 1443.86   62.59
   2  -3   2 1602.44   63.19
  -2  -3  -2 1566.74   62.19
  -2   3   2 1528.65   62.59
  -2  -3  -2 1684.93   62.69
   2   3  -2 1586.64   62.49
   2   3  -2 1509.75   61.79
  -2   3   2 1643.74   62.89
   2   3   2 1541.35   62.29
   2   3   2 1412.76   62.39
  -2  -3   2 1567.44   61.79
   2  -3  -2 1563.94   62.59
  -2  -3   2 1585.14   63.29
   2  -3  -2 1625.64   61.79
   2  -3  -2 1672.33   61.79
  -2   3  -2 1536.65   62.79
  -2   3  -2 1541.65   62.69
  -2  -3   2 1421.06   62.39
   2  -3  -2 1453.85   62.29
   2   3   2 1583.64   62.89
  -2   3  -2 1467.65   62.29
  -2  -3   2 1572.04   62.49
  -2   3  -2 1523.55   63.09
  -3  -3  -2  268.87   12.80
  -3   3   2  261.27   13.60
  -3   3   2  280.37   13.80
   3   3  -2  259.57   12.20
   3  -3   2  252.87   13.50
   3   3  -2  229.88   12.80
   3   3  -2  269.27   13.30
   3  -3   2  254.07   13.50
  -3   3   2  261.67   13.60
  -3  -3  -2  266.57   13.60
  -3   3   2  269.57   12.50
  -3  -3  -2  239.18   13.30
   3  -3  -2  270.47   13.50
  -3   3  -2  244.88   13.80
   3   3   2  209.28   13.00
   3   3   2  235.08   12.60
   3  -3  -2  260.07   13.30
  -3  -3   2  254.27   13.20
  -3   3  -2  261.17   13.60
  -3   3  -2  268.47   13.80
  -3  -3   2  254.47   12.20
   3  -3  -2  262.77   12.40
   3  -3  -2  249.58   12.00
  -3  -3   2  246.88   13.30
   3   3   2  246.08   13.50
  -3   3  -2  260.77   13.30
   4   3  -2  723.63   29.80
  -4  -3  -2  746.73   30.50
   4  -3   2  679.83   31.70
  -4   3   2  705.03   30.30
   4  -3   2  709.03   31.80
   4   3  -2  702.03   31.20
  -4   3   2  703.13   31.80
  -4   3   2  647.54   31.70
  -4  -3  -2  701.93   31.70
  -4   3   2  706.93   31.70
  -4  -3  -2  692.53   31.60
  -4  -3  -2  697.43   31.90
  -4   3  -2  704.93   31.80
  -4   3  -2  751.62   32.30
   4   3   2  722.93   31.90
  -4   3  -2  693.73   31.20
   4   3   2  736.03   31.90
  -4  -3   2  755.72   31.70
  -4   3  -2  621.04   31.90
  -4  -3   2  750.62   29.70
   4  -3  -2  709.23   30.30
  -4  -3   2  659.43   31.40
   4  -3  -2  702.43   29.40
   4   3   2  670.23   30.30
  -5  -3  -2 4366.46  169.48
  -5   3   2 4042.60  166.98
  -5   3   2 4559.54  169.68
   5   3  -2 4328.87  165.98
  -5  -3  -2 4374.56  169.28
  -5   3   2 3842.62  168.48
   5   3  -2 4269.87  168.48
  -5  -3  -2 4151.38  168.68
   5  -3   2 4241.48  169.08
   5  -3  -2 4173.18  168.48
  -5   3  -2 4411.26  168.48
  -5   3  -2 4286.97  169.18
  -5  -3   2 4263.07  168.78
  -5   3  -2 4258.37  169.98
  -5  -3   2 4447.96  165.98
  -5  -3   2 4148.79  168.28
   5  -3  -2 4367.26  165.68
  -5  -3   2 4099.19  168.78
   5   3   2 4167.18  168.88
   5   3   2 4282.07  166.98
  -6   3   2  128.29    9.00
   6   3  -2  134.09   12.90
   6  -3   2  123.89   10.20
  -6   3   2  138.49   10.80
  -6  -3  -2  122.49   10.10
  -6  -3  -2  116.89   10.20
   6   3  -2  126.49    7.50
  -6   3  -2  122.69    9.40
  -6  -3   2  116.39    9.50
  -6   3  -2  129.49   10.60
   6   3   2  119.89   10.10
   6   3   2  138.09    8.80
   6  -3  -2  110.29    9.60
  -6   3  -2  104.99   11.40
  -6  -3   2  130.59   10.40
  -7   3   2   32.80    5.50
   7  -3   2   29.30    6.20
  -7  -3  -2   30.40    6.40
  -7  -3  -2   42.90    7.20
  -7   3   2   32.10    6.20
  -7   3  -2   25.70    6.20
  -7   3  -2   38.70    6.40
   7   3   2   31.30    4.70
  -7  -3   2   32.10    6.50
  -7  -3   2   19.90    5.20
  -7   3  -2   42.00    8.00
  -8  -3  -2  137.69   14.20
  -8  -3  -2  125.09   13.20
  -8   3   2  129.69   10.70
  -8   3   2  130.69   13.80
  -8  -3   2  128.19   12.80
  -8  -3   2  128.89   13.60
  -8   3  -2  139.99   15.00
  -8   3  -2  109.29   12.00
  -8   3  -2  123.89   13.60
   0   4   2   55.29    5.30
   0   4  -2   59.69    5.60
   0  -4  -2   58.69    4.80
   0  -4   2   57.29    5.30
   0  -4   2   47.10    5.10
   0  -4  -2   62.19    5.30
   0   4  -2   58.89    5.10
   0  -4   2   53.29    5.60
   0  -4  -2   55.69    5.30
   0  -4   2   52.69    5.30
   0   4   2   72.29    5.50
   0   4  -2   49.99    5.00
   0   4   2   57.79    5.00
   0   4   2   55.19    4.70
   0  -4  -2   57.59    5.50
   1   4  -2 1085.99   42.50
  -1  -4  -2  993.20   42.50
  -1   4   2 1024.50   42.20
   1  -4   2 1060.09   42.60
   1  -4   2 1094.49   43.90
   1  -4   2 1030.50   42.10
  -1   4   2  988.60   42.40
   1  -4   2 1084.49   44.60
  -1   4   2 1031.10   42.70
   1   4  -2  980.90   42.10
  -1  -4  -2 1041.00   42.10
  -1  -4  -2 1061.99   42.50
   1   4  -2 1015.20   42.10
   1   4  -2 1035.00   43.00
  -1  -4  -2 1024.20   42.10
   1  -4   2  987.50   42.50
  -1   4   2 1007.70   42.00
   1   4   2 1040.10   42.80
   1  -4  -2 1001.40   41.90
  -1   4  -2  975.90   42.40
   1  -4  -2 1002.20   42.00
   1   4   2 1004.40   42.00
  -1  -4   2  915.21   42.10
   1   4   2  994.10   42.50
   1  -4  -2  986.90   42.30
  -1  -4   2 1008.30   42.00
  -1   4  -2 1016.40   42.40
   1  -4  -2  989.50   42.40
   1   4   2 1028.20   42.40
  -1   4  -2  944.91   42.60
  -1  -4   2 1024.60   42.90
  -1  -4   2  976.60   42.20
  -2   4   2  682.33   30.90
  -2  -4  -2  751.12   31.30
  -2  -4  -2  713.63   31.40
   2   4  -2  713.63   30.80
  -2  -4  -2  681.83   30.70
   2  -4   2  713.63   30.60
   2   4  -2  671.53   30.30
   2  -4   2  648.74   30.90
  -2   4   2  721.43   31.30
  -2  -4  -2  676.73   30.40
  -2   4   2  657.83   31.00
   2  -4   2  727.03   31.30
   2   4  -2  718.93   31.00
  -2   4  -2  758.62   31.90
   2  -4  -2  770.52   30.30
   2  -4  -2  730.53   31.00
  -2  -4   2  725.43   31.30
  -2  -4   2  721.53   30.30
  -2   4  -2  738.33   31.40
   2   4   2  694.73   31.30
  -2   4  -2  682.03   30.90
   2  -4  -2  695.33   30.10
   2   4   2  721.03   31.20
   2  -4  -2  692.63   31.00
   2   4   2  686.33   30.60
  -2  -4   2  738.13   31.10
   3  -4   2  232.68   13.00
   3   4  -2  218.48   11.70
  -3  -4  -2  237.18   12.90
  -3   4   2  236.68   13.10
   3   4  -2  244.18   12.60
   3  -4   2  230.28   13.00
  -3   4   2  226.78   12.80
  -3   4   2  207.68   12.70
  -3  -4  -2  214.38   12.70
  -3  -4   2  230.88   11.70
  -3   4  -2  237.18   13.50
   3   4   2  211.28   12.60
   3   4   2  222.28   12.90
  -3  -4   2  248.48   12.70
  -3  -4   2  210.18   12.50
   3  -4  -2  210.88   11.40
   3  -4  -2  215.28   12.50
   3   4   2  207.38   12.00
  -3   4  -2  240.48   13.20
   3  -4  -2  237.78   11.90
  -3   4  -2  215.58   12.70
  -4  -4  -2  285.67   16.20
  -4  -4  -2  283.37   15.90
  -4   4   2  270.97   15.80
  -4   4   2  295.77   16.00
   4  -4   2  262.27   15.70
   4  -4   2  328.37   16.80
  -4   4   2  247.18   15.60
   4   4  -2  288.77   15.40
   4   4  -2  278.67   14.20
   4  -4  -2  292.57   14.10
  -4  -4   2  302.77   15.90
  -4  -4   2  309.87   14.40
   4  -4  -2  259.67   15.30
  -4   4  -2  283.97   15.50
  -4   4  -2  289.07   16.40
   4   4   2  298.37   14.90
   4   4   2  269.17   15.70
  -4  -4   2  287.97   15.90
  -4   4  -2  302.67   16.10
  -5   4   2  409.16   20.40
  -5   4   2  411.56   21.90
   5   4  -2  409.16   21.20
  -5   4   2  429.46   22.20
  -5  -4  -2  378.16   21.60
  -5  -4  -2  406.66   21.70
  -5   4   2  441.76   22.70
   5   4  -2  413.66   19.50
  -5   4  -2  470.15   22.60
   5   4   2  389.26   21.50
  -5  -4   2  410.16   19.50
  -5   4  -2  407.26   22.60
  -5  -4   2  398.76   21.80
   5   4   2  415.66   20.20
  -5  -4   2  450.45   22.00
  -5   4  -2  440.66   21.40
   5  -4  -2  408.96   19.10
  -6  -4  -2    9.40    3.90
   6  -4   2    4.40    3.60
  -6   4   2   14.20    3.90
   6   4  -2   13.30    3.00
  -6  -4  -2    5.40    3.80
  -6   4   2    2.90    3.50
  -6   4   2    8.70    4.10
  -6   4  -2    8.50    3.60
   6   4   2    8.30    3.10
  -6   4  -2    2.70    3.00
  -6  -4   2    7.70    3.80
   6   4   2    5.60    3.60
  -6  -4   2    5.80    3.20
  -6   4  -2    7.20    3.50
  -7   4   2  123.69    9.80
  -7  -4  -2  132.49   13.00
  -7   4   2  117.99   12.50
  -7  -4  -2  124.39   13.00
  -7   4   2  129.29   13.60
  -7  -4   2  140.49   13.40
   7   4   2  136.39    9.40
  -7  -4   2  132.39   11.10
  -7   4  -2  118.99   12.50
  -7   4  -2  126.59   13.50
  -7   4  -2  130.69   12.30
  -8  -4  -2   15.90    5.30
  -8   4   2   23.90    6.60
  -8   4   2   15.50    5.80
  -8  -4  -2   25.80    7.00
  -8   4   2   30.00    6.30
  -8   4  -2   26.60    6.40
  -8  -4   2   16.50    5.40
  -8  -4   2   26.10    6.40
  -8   4  -2   31.70    8.00
   0   5  -2   16.50    3.40
   0  -5  -2   17.40    3.30
   0  -5  -2   14.30    3.10
   0  -5  -2   16.10    3.50
   0   5   2   13.50    3.30
   0   5  -2   10.80    3.20
   0   5  -2   13.00    3.10
   0   5   2   16.20    3.30
   0  -5   2   15.30    3.50
   0   5   2    9.50    3.10
   0   5   2   11.60    3.30
   0  -5   2   11.20    3.10
   1  -5   2   22.70    3.80
   1   5  -2   23.10    3.90
  -1   5   2   26.90    4.60
  -1   5   2   20.10    3.70
  -1  -5  -2   16.90    3.70
   1   5  -2   22.80    4.20
  -1   5   2   24.30    4.10
   1  -5   2   26.80    4.20
  -1  -5  -2   23.80    4.10
   1   5  -2   19.80    3.50
  -1   5   2   23.70    4.00
  -1   5  -2   16.10    3.60
   1  -5  -2   29.20    4.50
   1   5   2   19.60    3.70
   1   5   2   25.20    4.10
  -1   5  -2   18.60    3.70
   1   5   2   28.40    4.30
   1   5   2   22.60    3.80
  -1   5  -2   28.70    4.60
  -1  -5   2   29.20    4.40
  -1  -5   2   18.70    3.60
   1  -5  -2   25.70    4.30
  -2  -5  -2  959.70   42.10
  -2   5   2  947.71   41.70
  -2   5   2  990.10   42.20
   2  -5   2  895.01   41.70
  -2   5   2 1011.50   42.40
   2  -5   2  968.40   42.10
  -2  -5  -2 1035.20   42.20
   2   5  -2  947.21   41.30
   2   5  -2  961.00   41.60
   2   5   2 1059.19   42.60
  -2  -5   2  972.30   42.10
   2   5   2  979.10   41.60
   2   5   2  887.91   41.60
  -2   5  -2 1005.00   42.70
  -2  -5   2  947.91   41.70
   2  -5  -2  978.40   42.00
  -2   5  -2  946.01   41.80
   3   5  -2  271.07   14.30
   3   5  -2  260.87   14.80
  -3   5   2  286.47   15.50
  -3   5   2  301.97   15.80
  -3  -5  -2  255.67   15.30
  -3  -5  -2  296.47   15.60
   3  -5   2  267.97   15.30
   3  -5   2  254.87   15.20
  -3   5   2  283.87   15.30
  -3  -5   2  274.07   15.50
   3   5   2  254.77   15.00
   3  -5  -2  250.27   14.90
  -3   5  -2  274.57   15.40
  -3  -5   2  268.07   15.00
   3   5   2  268.57   14.70
  -3   5  -2  259.07   15.50
   4   5  -2  185.08   12.30
  -4   5   2  212.98   13.50
  -4   5   2  188.28   12.90
  -4   5   2  199.98   13.20
  -4  -5  -2  183.48   12.80
   4   5  -2  194.98   11.50
   4  -5   2  197.88   13.00
  -4   5  -2  226.28   13.50
  -4  -5   2  227.68   13.20
   4   5   2  222.68   13.40
  -4  -5   2  201.38   13.00
   4  -5  -2  187.58   12.60
   4   5   2  168.98   11.30
  -4   5  -2  208.98   13.80
  -5   5   2  344.77   20.20
   5  -5   2  333.87   19.80
  -5  -5  -2  348.67   20.20
   5   5  -2  351.46   17.80
  -5   5   2  375.96   20.40
   5   5   2  339.47   18.20
   5  -5  -2  351.06   19.80
   5   5   2  334.27   19.60
  -5   5  -2  365.36   20.20
  -5   5  -2  338.17   20.60
  -5  -5   2  369.56   20.20
  -5   5  -2  396.76   19.80
  -6   5   2  145.19   12.20
   6  -5   2  141.29   11.80
   6   5  -2  123.19    9.20
  -6   5   2  152.08   12.20
  -6  -5  -2  136.59   13.40
  -6  -5  -2  154.38   12.10
  -6  -5   2  142.69   12.00
  -6   5  -2  152.88   11.90
   6   5   2  159.98   10.70
  -6   5  -2  163.08   13.40
  -6   5  -2  135.49   11.00
  -7   5   2   24.70    7.00
  -7  -5  -2   49.60    8.50
  -7  -5  -2   36.60    7.20
  -7   5   2   33.50    7.10
  -7   5  -2   48.40    7.60
  -7  -5   2   27.10    6.60
   7   5   2   34.30    5.70
  -7  -5   2   36.10    6.90
  -7   5  -2   35.90    8.00
  -7   5  -2   50.19    9.40
   0   6  -2    6.20    2.80
   0   6  -2    4.70    3.10
   0  -6  -2    4.70    2.80
   0  -6   2    5.70    3.00
   0   6   2    4.60    2.50
   0   6   2    3.20    2.70
   0  -6   2    0.50    1.90
   0   6   2    6.40    2.70
   0   6   2    2.00    2.80
   1  -6   2   42.10    6.00
   1  -6   2   40.70    5.90
  -1   6   2   37.60    5.50
   1   6  -2   45.10    5.80
  -1   6   2   38.40    5.40
   1   6  -2   46.30    6.30
  -1   6   2   43.70    6.20
  -1   6   2   35.30    5.60
  -1  -6  -2   42.50    5.90
  -1   6  -2   44.20    6.00
   1   6   2   44.80    5.80
   1   6   2   47.20    6.20
   1  -6  -2   57.39    6.70
  -1  -6   2   40.60    5.80
   1   6   2   36.20    5.20
  -1  -6   2   35.50    5.30
  -1   6  -2   45.10    6.20
  -2   6   2  148.39   10.50
   2  -6   2  132.09    9.80
   2   6  -2  145.99   10.00
  -2  -6  -2  139.09   10.00
   2  -6   2  143.79   10.30
  -2   6   2  143.89   10.40
  -2   6   2  128.09    9.60
   2   6  -2  139.29   10.30
   2   6  -2  134.39    9.60
  -2   6  -2  139.79   10.50
  -2   6  -2  147.39   10.20
   2   6   2  136.79    9.90
  -2  -6   2  132.89    9.60
  -2  -6   2  148.89   10.40
   2  -6  -2  128.09    9.60
   2   6   2  125.69    9.70
  -3   6   2   52.09    7.00
  -3   6   2   45.20    6.40
  -3  -6  -2   35.80    5.90
  -3   6   2   47.10    7.70
   3  -6   2   41.70    6.10
   3   6  -2   30.90    4.90
   3   6  -2   40.70    5.90
   3   6   2   32.80    5.20
   3   6   2   37.30    6.10
  -3  -6   2   40.30    6.20
  -3  -6   2   37.40    6.10
   3  -6  -2   36.10    5.90
  -3   6  -2   28.10    5.30
  -3   6  -2   30.30    6.00
  -4   6   2  533.75   27.20
  -4  -6  -2  505.75   27.00
   4   6  -2  548.85   25.70
   4  -6   2  560.94   27.40
   4   6  -2  530.15   26.80
  -4   6   2  509.15   27.00
  -4   6  -2  544.45   27.90
   4  -6  -2  528.25   26.80
  -4   6  -2  534.05   27.00
  -4  -6   2  524.95   27.10
   4   6   2  544.15   27.10
   4   6   2  528.85   25.90
  -5   6   2   46.10    7.30
   5   6  -2   39.40    5.70
   5  -6   2   29.60    6.40
  -5  -6  -2   38.60    7.30
  -5   6   2   27.70    6.20
   5   6   2   26.50    5.20
   5   6   2   36.60    6.80
  -5   6  -2   36.70    6.50
  -5   6  -2   27.70    6.80
  -5  -6   2   50.89    7.80
  -6  -6  -2  185.98   14.30
  -6  -6  -2  170.78   14.10
  -6   6   2  192.78   14.70
  -6   6   2  213.98   15.20
   6   6  -2  178.58   11.80
   6   6   2  184.48   12.50
  -6   6  -2  191.38   15.40
  -6  -6   2  178.48   14.10
  -6   6  -2  183.48   14.30
  -7  -6  -2   48.30    9.10
  -7   6   2   69.09   10.20
  -7  -6  -2   56.39    9.20
  -7   6   2   64.99   10.60
  -7  -6   2   85.79   11.00
  -7  -6   2   69.39   10.00
  -7   6  -2   92.59   12.20
   0  -7   2  805.62   38.30
   0  -7   2  869.21   38.50
   0   7  -2  880.71   38.50
   0   7   2  854.41   38.00
   0  -7  -2  839.92   38.50
   0   7   2  822.32   38.10
   0   7  -2  803.82   38.50
   0   7   2  830.92   38.40
  -1   7   2  361.06   19.70
   1  -7   2  346.17   20.00
  -1   7   2  357.16   19.70
   1   7  -2  389.66   20.10
   1   7  -2  372.26   20.50
  -1  -7  -2  397.16   20.70
  -1   7   2  389.66   20.60
  -1  -7   2  380.66   20.20
  -1   7  -2  387.16   20.20
  -1  -7   2  361.56   20.20
   1   7   2  342.97   19.50
   1  -7  -2  375.46   20.30
   1   7   2  385.26   20.00
  -1   7  -2  389.96   20.80
   1   7   2  374.56   20.40
   2   7  -2  296.47   16.40
  -2   7   2  280.47   16.80
   2  -7   2  272.47   16.50
   2   7  -2  289.47   17.00
  -2  -7  -2  265.87   16.50
  -2   7   2  248.78   15.80
   2   7   2  242.08   15.80
   2  -7  -2  296.97   16.70
   2   7   2  265.17   15.80
  -2   7  -2  257.87   16.00
  -2  -7   2  266.17   16.40
  -2  -7   2  265.97   16.20
  -2   7  -2  263.17   16.50
  -3   7   2  311.77   18.10
   3  -7   2  300.37   17.90
   3   7  -2  291.37   16.90
  -3  -7  -2  268.37   17.30
  -3   7   2  285.37   17.50
   3  -7  -2  309.57   17.70
  -3   7  -2  280.57   17.40
   3   7   2  261.57   17.30
  -3  -7   2  343.57   18.60
  -3   7  -2  303.67   18.30
   3   7   2  283.47   16.70
  -4  -7  -2   31.60    6.80
  -4   7   2   29.00    6.50
   4  -7   2   37.90    7.00
  -4   7   2   41.90    7.00
   4   7  -2   32.80    5.90
   4   7   2   26.30    6.20
  -4   7  -2   31.00    6.40
  -4  -7   2   40.30    6.90
  -4   7  -2   38.00    6.70
   4   7   2   34.30    6.20
  -5   7   2  267.77   17.90
  -5  -7  -2  257.87   17.60
   5   7  -2  256.67   15.70
   5  -7   2  257.97   17.40
  -5   7   2  259.77   17.70
   5   7   2  264.07   16.30
  -5   7  -2  239.28   17.90
  -5  -7   2  278.47   17.90
  -6   7   2    5.60    4.40
  -6  -7  -2    2.40    4.20
  -6  -7  -2   -3.30    3.70
  -6   7   2    4.00    4.50
   6   7  -2    1.40    3.20
  -6  -7   2    3.90    4.50
   6   7   2    0.80    3.20
  -6   7  -2    8.90    5.50
   0   8   2  204.78   14.10
   0  -8  -2  209.78   14.50
   0   8  -2  206.28   14.30
   0   8   2  220.78   14.10
   0   8   2  217.08   14.60
   0  -8   2  183.28   14.00
   0   8  -2  193.18   14.00
  -1  -8  -2  585.34   29.70
  -1   8   2  593.64   29.20
   1   8  -2  582.14   30.00
  -1   8   2  563.44   29.50
   1  -8   2  559.44   29.50
   1   8   2  573.64   29.40
  -1   8  -2  625.24   29.90
   1  -8  -2  575.34   29.50
  -1  -8   2  579.74   29.50
   1   8   2  628.54   29.70
  -1   8  -2  553.34   29.60
   1   8   2  584.24   29.20
  -2  -8  -2  230.98   16.00
   2  -8   2  250.17   16.30
  -2   8   2  268.57   16.10
  -2   8   2  230.88   16.00
  -2  -8   2  233.78   15.90
   2   8   2  241.68   16.10
   2   8   2  237.58   15.70
  -2   8  -2  232.28   16.20
  -2   8  -2  241.28   16.10
   2  -8  -2  227.58   15.60
  -3   8   2  122.89   12.40
  -3  -8  -2  145.89   12.30
  -3   8   2  146.19   11.80
   3  -8   2  127.79   11.10
   3   8   2  127.99   12.20
  -3   8  -2  140.89   12.30
  -3  -8   2  134.89   13.10
  -4   8   2  176.18   14.70
   4  -8   2  205.78   15.20
  -4   8   2  207.08   15.30
  -4  -8  -2  177.38   14.80
   4   8   2  208.78   14.50
  -4  -8   2  248.68   16.30
  -4   8  -2  207.08   15.80
  -5   8   2    6.40    5.10
  -5  -8  -2   -0.40    4.00
  -5   8   2    2.70    4.20
   5   8   2    2.00    3.60
  -5  -8   2    3.80    4.50
  -5   8  -2    4.40    4.90
   0  -9  -2   79.19   11.70
   0   9   2   75.29    9.50
   0   9   2   72.99    9.50
   0  -9   2   73.09    9.50
   0   9  -2   78.99   10.30
  -1   9   2   71.99    9.40
  -1  -9  -2   70.69   10.00
   1  -9   2   64.59    9.50
  -1   9   2   76.39   10.00
   1   9  -2   62.99    9.70
  -1  -9   2   67.99    9.70
   1   9   2   79.69   10.10
  -1   9  -2   79.89   10.40
   1   9   2   82.19   10.20
  -2   9   2  162.18   13.40
   2  -9   2  146.39   14.50
  -2   9   2  163.28   13.10
  -2  -9  -2  145.49   14.50
  -2  -9   2  156.68   12.80
   2   9   2  140.89   13.90
  -2   9  -2  168.28   13.80
   3  -9   2   21.20    7.30
  -3   9   2   17.60    7.70
  -3   9   2   13.00    5.40
   3   9   2   21.20    6.00
  -3  -9   2   11.20    5.30
  -3   9  -2   24.00    6.60
  -4   9   2   -0.90    3.80
  -4  -9   2    2.60    3.50
  -4   9  -2    3.40    4.60
   4   9   2    3.90    4.20
   0 -10   2   50.29    9.00
   0  10   2   56.59    8.80
   0  10  -2   47.30    8.80
   1  10  -2  152.78   15.40
  -1  10   2  138.79   13.80
   1 -10   2  149.99   16.80
  -1  10  -2  151.48   15.10
   1  10   2  102.39   12.60
  -1 -10   2  124.39   14.10
  -2  10   2  473.35   27.00
  -2 -10   2  452.65   27.20
  -2  10  -2  470.35   27.60
   0   0  -3   -3.80    0.90
   0   0   3   -9.00    0.60
   0   0   3   -7.30    0.70
   0   0  -3   -9.50    0.60
   1   0   3 1184.88   46.50
   1   0   3 1167.88   46.30
  -1   0  -3 1193.98   46.20
  -1   0  -3 1178.58   46.50
   1   0  -3 1164.58   45.50
  -1   0   3 1161.48   45.70
   1   0  -3 1218.68   45.60
   1   0   3 1134.59   46.20
  -1   0   3 1156.08   45.70
   2   0  -3   92.09    4.90
  -2   0  -3   82.09    5.30
   2   0  -3   81.69    4.70
   2   0   3   87.49    5.50
   2   0   3   85.39    5.40
  -2   0   3   88.49    4.60
  -2   0   3   92.49    5.10
  -2   0  -3   89.69    5.50
   2   0   3   94.59    5.50
  -2   0  -3   91.09    5.50
  -2   0   3   89.99    5.10
  -3   0  -3 2477.35   97.59
   3   0   3 2539.15   97.69
   3   0   3 2414.66   97.59
  -3   0  -3 2401.86   97.49
   3   0   3 2655.43   97.79
  -3   0   3 2474.45   96.39
  -3   0   3 2401.06   97.09
   3   0   3 2235.68   96.39
  -3   0  -3 2588.94   97.79
   3   0  -3 2543.35   96.89
  -3   0   3 2361.66   96.99
   4   0   3  312.47   15.20
  -4   0   3  287.07   13.70
  -4   0  -3  286.57   14.80
  -4   0   3  274.37   14.40
  -4   0  -3  281.67   14.80
   4   0  -3  275.07   14.10
  -4   0  -3  295.77   15.00
   4   0   3  301.87   15.10
   4   0   3  266.57   13.40
  -4   0   3  282.27   14.50
  -5   0   3   35.80    4.50
  -5   0  -3   46.80    6.00
  -5   0  -3   37.70    5.60
   5   0   3   31.90    3.90
   5   0   3   42.10    5.80
  -5   0   3   44.90    5.50
   5   0   3   43.20    5.80
  -5   0   3   38.20    5.40
   5   0  -3   36.60    4.90
  -6   0  -3  392.66   20.30
  -6   0  -3  378.36   19.80
   6   0   3  376.16   17.50
  -6   0   3  365.36   18.60
   6   0  -3  368.46   19.10
  -6   0   3  327.47   19.10
   6   0   3  363.76   19.80
  -7   0   3  396.06   20.30
  -7   0  -3  401.86   21.50
   7   0   3  374.66   18.50
   7   0   3  436.86   22.40
  -7   0  -3  350.96   21.40
  -7   0   3  398.26   22.00
  -8   0  -3   21.60    5.70
  -8   0   3    9.60    4.00
  -8   0  -3   16.80    5.70
  -8   0   3   10.40    5.00
  -9   0   3    9.00    5.20
   0  -1  -3  141.19    6.60
   0  -1   3  155.78    6.50
   0   1   3  151.48    6.90
   0  -1   3  139.89    6.90
   0  -1  -3  137.59    6.80
   0  -1  -3  144.49    6.60
   0   1  -3  145.19    6.40
   0   1   3  149.59    5.90
   0   1   3  140.19    6.60
   0   1  -3  146.59    6.30
   0  -1   3  146.79    6.50
   0   1   3  164.68    6.80
   0  -1   3  140.69    7.00
   0   1  -3  147.89    7.10
   1  -1   3  396.26   16.40
  -1   1   3  389.76   15.90
   1   1  -3  399.76   15.80
  -1   1   3  380.56   16.10
   1  -1   3  389.56   16.70
  -1  -1  -3  400.96   16.60
  -1  -1  -3  385.66   16.40
  -1  -1  -3  397.66   16.60
  -1   1   3  379.56   16.10
   1  -1   3  370.16   16.30
   1  -1   3  407.76   16.70
   1   1  -3  386.66   15.80
  -1  -1  -3  387.26   16.40
  -1  -1   3  369.16   15.90
   1   1   3  382.46   16.50
   1   1   3  378.46   16.40
   1  -1  -3  386.66   16.10
  -1  -1   3  408.76   16.80
  -1  -1   3  388.16   16.00
   1   1   3  387.86   16.50
  -1   1  -3  418.26   16.50
  -1   1  -3  375.76   16.60
  -1   1  -3  385.16   16.70
   1  -1  -3  382.76   16.00
   1  -1  -3  384.16   15.30
   1  -1  -3  388.96   15.80
   2   1  -3 1265.97   53.29
   2  -1   3 1376.56   54.19
  -2   1   3 1398.46   52.79
   2  -1   3 1412.36   54.29
  -2  -1  -3 1464.55   53.89
  -2   1   3 1361.86   53.79
  -2   1   3 1331.97   52.49
  -2  -1  -3 1234.78   53.99
  -2  -1  -3 1350.56   54.19
  -2   1   3 1359.66   53.89
   2   1  -3 1383.06   53.49
  -2  -1  -3 1359.96   54.19
   2  -1   3 1399.96   54.29
  -2  -1   3 1393.16   53.69
   2   1   3 1418.66   54.29
  -2  -1   3 1290.57   53.59
   2  -1  -3 1327.67   53.59
   2   1   3 1294.17   53.69
   2  -1  -3 1327.77   52.49
  -2   1  -3 1352.46   54.09
  -2  -1   3 1291.77   52.59
  -2   1  -3 1319.07   54.39
  -2   1  -3 1376.66   54.19
  -2   1  -3 1265.07   54.09
   2  -1  -3 1410.36   52.89
   2   1   3 1347.27   54.19
  -3   1   3  831.12   37.00
   3   1  -3  894.01   36.70
  -3   1   3  898.31   36.10
   3  -1   3  943.51   37.50
   3  -1   3  877.61   37.40
  -3  -1  -3  755.02   37.00
  -3  -1  -3  869.91   37.40
   3   1  -3  861.41   35.00
  -3   1   3  938.31   37.30
  -3  -1  -3  855.81   37.40
   3  -1   3  823.22   37.30
   3  -1  -3  967.20   36.20
  -3   1  -3  988.00   37.90
  -3  -1   3  940.41   35.00
  -3   1  -3  895.51   37.40
  -3   1  -3  867.51   37.30
   3  -1  -3  901.31   36.90
  -3  -1   3  874.91   37.00
   3   1   3  926.31   37.70
  -3  -1   3  883.41   37.00
   3  -1  -3  907.31   34.90
   3   1   3  849.52   36.50
   3   1   3  888.51   37.50
   3  -1  -3  949.90   37.00
   4  -1   3  195.28   11.60
  -4  -1  -3  196.78   11.40
  -4  -1  -3  213.98   11.90
  -4   1   3  191.88   11.30
   4   1  -3  210.38   11.10
  -4  -1  -3  211.18   11.80
   4  -1   3  200.18   11.60
  -4   1   3  208.68   10.40
  -4   1   3  170.08   11.00
   4   1  -3  215.38    8.70
  -4  -1   3  218.48   11.50
  -4  -1   3  190.68   11.20
   4  -1  -3  215.28   10.50
   4   1   3  222.88   10.60
  -4  -1   3  184.58   10.60
   4  -1  -3  199.78    8.50
  -4   1  -3  199.78   11.60
  -4   1  -3  218.78   11.60
   4   1   3  209.08   11.80
  -4   1  -3  210.48   11.90
   4  -1  -3  205.78   11.20
   4   1   3  192.48   11.60
   5  -1   3  719.93   32.10
  -5   1   3  714.93   30.30
  -5  -1  -3  664.93   31.40
  -5   1   3  722.63   31.70
   5  -1   3  678.23   31.70
  -5   1   3  715.93   31.80
   5   1  -3  681.13   27.50
  -5  -1  -3  686.53   31.80
  -5  -1  -3  682.93   31.80
   5   1  -3  737.33   31.20
   5   1   3  693.43   29.80
   5   1   3  660.23   31.60
  -5   1  -3  663.53   31.70
   5  -1  -3  696.93   31.10
  -5  -1   3  702.73   31.50
  -5  -1   3  683.13   30.60
   5   1   3  708.93   33.80
  -5   1  -3  715.53   32.40
   5  -1  -3  693.13   27.40
  -5   1  -3  666.53   31.30
   5  -1  -3  688.63   27.40
  -5  -1   3  730.43   31.70
   6   1  -3  333.57   18.20
  -6  -1  -3  341.87   19.10
  -6   1   3  326.97   18.90
  -6  -1  -3  348.97   18.80
   6  -1   3  319.27   16.40
   6   1  -3  354.76   14.10
  -6   1   3  335.17   17.60
   6  -1   3  361.16   19.30
  -6   1   3  376.26   19.50
   6  -1  -3  368.36   14.10
  -6   1  -3  339.57   19.10
  -6  -1   3  355.96   19.00
  -6   1  -3  341.47   18.90
   6  -1  -3  344.37   18.50
   6   1   3  377.06   19.60
   6   1   3  341.37   16.80
  -6  -1   3  347.87   18.90
   6  -1  -3  353.36   13.90
  -6  -1   3  325.37   17.80
   7  -1   3   44.80    7.10
  -7  -1  -3   33.90    6.40
  -7   1   3   39.10    5.70
   7  -1   3   46.10    5.20
  -7  -1  -3   36.90    6.90
  -7   1   3   41.60    7.00
  -7   1  -3   50.59    7.10
   7   1   3   53.79    5.50
  -7  -1   3   38.30    6.10
  -7   1  -3   40.40    7.10
   7   1   3   48.10    7.20
  -7  -1   3   37.90    6.70
  -8  -1  -3  317.17   20.10
  -8   1   3  317.47   19.70
  -8  -1  -3  292.37   18.80
  -8   1   3  321.97   17.70
  -8   1  -3  306.67   18.90
  -8   1  -3  284.17   19.00
  -8  -1   3  299.87   19.30
  -8  -1   3  286.77   17.70
   0   2   3 1220.28   50.29
   0  -2   3 1284.67   50.19
   0   2   3 1280.87   49.60
   0   2  -3 1268.77   50.09
   0   2   3 1243.68   50.39
   0  -2  -3 1228.68   50.29
   0   2   3 1297.17   50.39
   0  -2   3 1280.17   50.19
   0  -2  -3 1243.58   50.19
   0  -2  -3 1239.18   49.60
   0  -2   3 1299.27   50.79
   0   2  -3 1245.98   50.69
   0  -2  -3 1303.67   50.39
  -1  -2  -3 5005.00  189.08
   1  -2   3 5068.99  190.18
  -1  -2  -3 4900.01  189.78
  -1  -2  -3 4971.10  189.58
   1  -2   3 4761.42  189.58
  -1   2   3 4968.90  189.58
  -1  -2  -3 4941.81  189.58
  -1   2   3 4897.11  189.18
   1   2  -3 4949.10  189.18
   1   2  -3 4867.41  190.08
   1  -2   3 5088.59  189.88
  -1   2   3 4763.02  189.48
   1  -2   3 4871.11  189.58
  -1   2   3 4867.81  189.18
   1   2   3 4887.31  189.68
  -1  -2   3 4845.12  189.28
   1   2   3 5113.49  189.88
  -1   2  -3 4826.12  189.48
   1  -2  -3 4958.90  189.18
  -1  -2   3 4966.00  189.18
   1  -2  -3 4420.36  189.28
   1   2   3 4528.75  189.48
  -1  -2   3 4733.53  189.18
  -1   2  -3 4738.03  189.78
   1  -2  -3 4981.50  189.38
  -1  -2   3 5049.00  190.18
  -1   2  -3 4801.62  189.98
  -1   2  -3 5182.28  189.68
   2   2  -3 1800.32   70.49
  -2   2   3 1690.53   70.79
   2  -2   3 1800.62   71.09
  -2  -2  -3 1734.13   71.09
   2  -2   3 1669.03   70.99
  -2  -2  -3 1850.41   71.19
   2  -2   3 1718.93   70.99
  -2   2   3 1724.53   70.79
  -2  -2  -3 1820.12   70.79
  -2   2   3 1804.52   69.89
  -2   2  -3 1911.91   71.29
  -2  -2   3 1742.73   70.69
   2   2   3 1759.02   70.69
  -2  -2   3 1796.02   69.89
   2   2   3 1800.52   71.19
   2  -2  -3 1729.33   70.59
   2  -2  -3 1713.63   69.79
   2   2   3 1888.81   71.39
  -2  -2   3 1851.71   71.69
  -2   2  -3 1780.92   71.09
  -2  -2   3 1767.12   70.59
  -2   2  -3 1787.12   71.59
   2  -2  -3 1868.31   70.89
  -2   2  -3 1787.92   71.09
   2  -2  -3 1768.22   69.69
   3   2  -3  245.38   11.50
  -3  -2  -3  219.28   11.80
  -3  -2  -3  230.28   11.90
   3   2  -3  231.48   11.40
   3  -2   3  212.98   11.70
   3  -2   3  224.98   11.90
  -3   2   3  205.78   11.40
   3  -2   3  234.08   12.20
  -3   2   3  227.68   10.60
   3   2  -3  220.28   10.20
  -3   2   3  229.08   11.90
  -3  -2  -3  210.18   11.90
  -3  -2  -3  239.98   11.40
   3   2   3  217.98   11.90
  -3  -2   3  223.38   11.50
  -3  -2   3  224.98   11.60
   3   2   3  212.38   11.10
  -3   2  -3  224.58   12.30
  -3   2  -3  240.08   12.20
   3  -2  -3  218.18   10.00
  -3   2  -3  222.28   11.90
  -3   2  -3  222.78   11.90
   3  -2  -3  221.88   11.50
   3  -2  -3  251.97   10.80
  -3  -2   3  216.18   10.10
   3   2   3  206.68   11.80
  -4   2   3   58.09    6.20
   4  -2   3   58.19    6.20
   4   2  -3   40.30    4.90
  -4  -2  -3   49.60    5.70
  -4   2   3   65.49    5.50
  -4  -2  -3   52.59    6.00
   4  -2   3   42.80    5.30
  -4  -2  -3   49.60    5.00
  -4   2   3   57.29    4.40
   4   2  -3   50.49    3.70
  -4  -2  -3   51.39    6.00
   4  -2  -3   54.49    3.50
  -4  -2   3   60.49    5.90
  -4   2  -3   60.89    6.50
  -4   2  -3   50.59    5.70
  -4  -2   3   57.09    3.70
  -4   2  -3   52.19    5.90
   4   2   3   47.00    5.70
  -4  -2   3   50.09    5.60
   4  -2  -3   52.39    4.90
  -4   2  -3   54.19    6.50
   4   2   3   56.39    6.30
   4  -2  -3   58.89    5.70
   4   2   3   57.59    4.70
   5   2  -3    3.60    1.40
  -5   2   3    3.40    2.50
  -5  -2  -3   -1.70    2.40
  -5  -2  -3    7.40    2.90
   5  -2   3    3.10    2.90
  -5  -2  -3    1.00    2.50
  -5   2   3    6.20    2.40
   5   2  -3    3.40    2.30
  -5   2   3    1.50    1.80
   5  -2  -3    4.00    1.30
   5   2   3    2.30    1.80
  -5   2  -3    0.90    2.50
  -5  -2   3    2.30    2.50
  -5  -2   3    0.90    2.40
  -5  -2   3    4.30    1.40
  -5   2  -3    0.70    1.90
   5  -2  -3    7.00    2.80
  -5  -2   3    7.80    2.50
   5   2   3    4.50    2.50
  -6  -2  -3   34.60    6.00
   6  -2   3   43.50    6.60
  -6  -2  -3   38.90    6.30
  -6   2   3   33.50    4.90
   6   2  -3   36.20    3.20
   6   2  -3   37.50    5.60
  -6   2   3   34.00    6.10
  -6   2   3   31.90    5.60
  -6   2  -3   39.50    6.10
  -6  -2   3   34.10    6.00
   6   2   3   34.70    4.50
   6   2   3   30.00    5.60
  -6   2  -3   46.90    6.50
   6  -2  -3   45.30    6.20
  -6  -2   3   46.00    6.10
  -6  -2   3   26.20    5.40
  -7  -2  -3  113.19   11.20
  -7   2   3  106.99   11.20
   7  -2   3  115.49    7.80
   7  -2   3  100.79   10.90
  -7  -2  -3  102.59   11.10
  -7   2   3   95.79    9.20
  -7   2  -3  105.39   11.30
  -7   2  -3   88.09   10.00
   7   2   3  112.19    7.80
   7   2   3  107.29   11.30
  -7  -2   3  115.09    9.60
  -7  -2   3  125.59   12.10
  -8   2   3   19.50    5.50
  -8   2   3   18.50    4.90
  -8  -2  -3   12.20    5.10
  -8  -2  -3   10.70    5.00
  -8  -2   3   20.40    5.30
  -8   2  -3    9.10    4.70
  -8  -2   3   13.20    5.20
  -8   2  -3   20.10    6.00
   0  -3   3  642.74   29.50
   0  -3  -3  701.03   29.70
   0  -3  -3  748.03   29.30
   0   3  -3  730.73   29.70
   0  -3   3  756.82   30.50
   0   3   3  696.43   29.70
   0   3  -3  667.13   29.40
   0   3   3  727.63   29.20
   0  -3   3  713.83   29.80
   0   3  -3  681.03   30.10
   0  -3   3  716.93   29.70
   0   3   3  701.33   29.90
   0  -3  -3  745.23   29.80
   0   3   3  726.63   30.00
   0  -3  -3  677.13   29.70
   1  -3   3 2063.09   78.79
   1  -3   3 1920.81   78.09
   1   3  -3 2092.69   77.99
  -1  -3  -3 1817.02   78.09
   1   3  -3 2027.40   78.79
   1  -3   3 1986.90   78.19
   1  -3   3 2008.90   78.29
  -1   3   3 1878.51   77.59
  -1  -3  -3 2085.09   77.59
  -1  -3  -3 1843.22   77.99
  -1  -3  -3 1944.31   77.99
  -1   3   3 2002.40   77.69
  -1   3   3 1975.00   78.19
  -1   3   3 1744.53   77.79
   1   3  -3 1923.91   77.69
  -1  -3   3 1956.50   77.89
   1  -3  -3 1942.91   78.09
   1   3   3 1968.30   78.39
  -1  -3   3 2054.39   77.99
  -1   3  -3 1889.41   77.89
   1  -3  -3 1988.90   77.69
   1   3   3 1975.40   78.19
  -1  -3   3 2059.19   77.79
  -1  -3   3 1992.30   78.69
  -1   3  -3 1947.01   78.69
  -1   3  -3 2102.69   78.29
   1  -3  -3 1924.41   77.89
   1   3   3 1926.51   78.19
   1  -3  -3 1912.71   77.49
  -2   3   3  747.03   31.50
   2   3  -3  758.62   30.90
  -2  -3  -3  721.63   31.80
  -2   3   3  718.93   30.80
   2  -3   3  698.73   31.70
  -2   3   3  755.82   31.90
  -2  -3  -3  760.52   31.50
  -2  -3  -3  722.63   31.70
   2   3  -3  757.12   31.40
   2  -3   3  754.72   31.80
   2  -3   3  781.62   32.10
   2  -3   3  761.42   32.30
  -2  -3  -3  681.23   31.20
   2   3  -3  721.83   31.10
  -2   3   3  760.72   31.80
   2  -3  -3  747.43   30.80
  -2   3  -3  780.72   32.50
  -2  -3   3  740.33   30.80
  -2  -3   3  788.82   32.50
  -2  -3   3  704.33   31.50
   2  -3  -3  741.03   31.60
  -2   3  -3  781.42   32.10
   2  -3  -3  786.72   30.70
  -2  -3   3  736.73   31.40
   2  -3  -3  731.03   31.50
   2   3   3  800.62   32.30
   2   3   3  731.53   31.40
  -2   3  -3  687.53   31.60
   2   3   3  738.73   31.90
  -2   3  -3  697.13   31.60
   3   3  -3   36.50    4.20
  -3   3   3   43.40    5.00
   3  -3   3   42.00    5.00
   3   3  -3   47.50    5.40
  -3  -3  -3   38.80    4.80
  -3  -3  -3   34.70    4.70
  -3  -3  -3   44.00    4.60
   3   3  -3   43.10    4.00
   3  -3   3   41.80    5.00
  -3   3   3   34.70    4.40
  -3   3   3   34.40    4.50
   3  -3  -3   40.70    3.80
  -3  -3   3   45.20    5.00
   3   3   3   31.80    4.00
   3  -3  -3   35.80    4.40
  -3   3  -3   33.60    4.80
  -3  -3   3   34.90    3.60
   3   3   3   43.60    5.20
  -3   3  -3   29.70    4.30
  -3  -3   3   39.20    4.60
   3   3   3   38.60    4.80
  -3   3  -3   36.00    5.10
  -3   3  -3   39.80    4.80
   3  -3  -3   41.50    4.00
   3  -3  -3   36.00    4.50
   4  -3   3  153.38   10.60
  -4   3   3  183.28   11.10
   4  -3   3  171.98   11.10
   4   3  -3  167.38   10.20
  -4  -3  -3  154.28   10.70
  -4   3   3  168.48    9.50
  -4  -3  -3  189.38   11.20
  -4  -3  -3  196.38   10.40
  -4  -3  -3  158.58   10.90
   4   3  -3  164.68    9.00
  -4   3   3  162.38   10.80
  -4  -3   3  182.08   10.80
   4  -3  -3  184.38    9.70
  -4   3  -3  150.68   11.20
  -4   3  -3  167.38   10.50
   4   3   3  188.18   11.30
   4   3   3  173.38   11.10
  -4  -3   3  180.18   10.90
  -4   3  -3  202.08   11.80
   4   3   3  172.68   10.00
  -4   3  -3  177.88   11.00
   4  -3  -3  175.18    9.00
  -4  -3   3  206.08    9.30
   5   3  -3  573.24   25.10
  -5   3   3  658.03   29.00
  -5  -3  -3  597.64   28.50
   5   3  -3  550.34   27.20
  -5  -3  -3  555.04   28.00
   5  -3   3  562.24   28.00
  -5   3   3  542.35   28.00
  -5   3   3  561.04   26.20
  -5   3  -3  603.24   27.90
  -5  -3   3  612.24   28.30
  -5   3  -3  611.24   28.50
   5   3   3  620.74   26.80
   5  -3  -3  578.14   27.70
   5   3   3  598.24   28.40
  -5   3  -3  601.64   29.00
   5  -3  -3  595.14   25.00
  -5  -3   3  610.54   28.10
  -5  -3   3  613.44   25.30
  -6   3   3   43.00    6.80
  -6  -3  -3   52.09    7.50
  -6   3   3   52.19    6.10
   6  -3   3   37.80    6.20
   6   3  -3   53.29    4.60
  -6  -3  -3   53.89    7.40
  -6   3  -3   49.00    7.00
  -6   3  -3   53.99    8.10
  -6   3  -3   42.90    6.90
   6   3   3   53.19    6.00
  -6  -3   3   36.10    6.40
  -6  -3   3   50.29    6.60
   6  -3  -3   55.99    8.30
   6   3   3   59.99    7.80
  -7  -3  -3  215.48   15.50
  -7   3   3  251.57   14.00
  -7   3   3  244.28   16.00
   7  -3   3  235.98   15.60
  -7  -3  -3  216.68   15.20
   7   3   3  221.58   12.90
  -7   3  -3  221.78   15.30
  -7  -3   3  209.48   15.20
  -7  -3   3  229.88   14.70
  -7   3  -3  220.58   14.80
  -7   3  -3  194.08   15.40
  -8   3   3  290.37   19.90
  -8  -3  -3  280.67   19.60
  -8   3   3  306.97   17.70
  -8  -3  -3  289.97   19.60
  -8   3  -3  330.37   19.80
  -8  -3   3  330.17   20.50
  -8  -3   3  366.56   20.10
  -8   3  -3  337.77   21.90
   0  -4  -3   69.49    5.40
   0  -4  -3   75.59    5.40
   0  -4   3   78.39    5.70
   0  -4   3   95.29    7.50
   0   4   3   83.89    5.60
   0   4   3   72.19    6.00
   0  -4   3   75.19    5.70
   0   4   3   77.69    5.80
   0   4   3   82.59    5.80
   0   4  -3   73.39    6.30
   0  -4   3   80.49    6.00
   0  -4  -3   85.79    6.00
   0   4  -3   79.69    5.90
   0   4  -3   65.99    5.50
   0  -4  -3   78.39    5.90
   1   4  -3  340.97   17.30
   1  -4   3  364.06   17.90
  -1  -4  -3  379.76   17.40
  -1  -4  -3  401.66   18.10
  -1  -4  -3  366.36   17.90
   1  -4   3  387.96   18.00
   1   4  -3  396.26   17.80
  -1   4   3  376.06   17.90
  -1   4   3  355.76   17.40
  -1   4   3  407.76   18.30
  -1  -4  -3  365.66   17.60
   1   4  -3  383.36   18.40
   1  -4   3  373.46   17.70
  -1   4   3  361.36   17.30
   1   4   3  369.16   17.30
   1   4   3  337.97   17.70
  -1  -4   3  371.66   17.70
   1  -4  -3  396.36   17.90
  -1   4  -3  381.96   18.50
   1  -4  -3  374.86   17.40
  -1  -4   3  363.46   17.80
   1   4   3  409.66   18.40
   1  -4  -3  377.46   17.50
   1   4   3  339.37   17.50
   1  -4  -3  391.76   18.00
  -1  -4   3  386.26   17.50
  -1   4  -3  354.56   17.60
  -1   4  -3  423.46   18.20
  -2  -4  -3 1286.47   55.79
  -2  -4  -3 1371.36   55.09
   2  -4   3 1409.26   55.39
  -2   4   3 1235.28   54.89
   2   4  -3 1399.66   56.29
  -2   4   3 1299.37   54.09
   2   4  -3 1342.67   54.29
  -2   4   3 1289.47   54.99
  -2   4   3 1298.17   54.69
   2  -4   3 1282.27   54.99
  -2  -4  -3 1299.47   55.19
   2   4  -3 1310.57   54.49
  -2  -4  -3 1288.77   54.39
  -2  -4   3 1326.97   54.69
  -2   4  -3 1339.97   54.99
   2  -4  -3 1422.36   55.09
  -2   4  -3 1394.36   55.89
  -2  -4   3 1357.16   54.19
   2  -4  -3 1293.57   54.79
   2   4   3 1310.47   54.69
  -2  -4   3 1317.87   54.89
   2   4   3 1273.17   54.99
  -2   4  -3 1397.76   55.39
   2  -4  -3 1312.17   53.79
   2  -4  -3 1357.16   54.09
   2   4   3 1370.26   55.49
   3   4  -3  232.18   13.00
  -3   4   3  275.77   14.00
   3  -4   3  264.07   14.10
  -3  -4  -3  251.27   13.80
  -3  -4  -3  244.18   13.80
   3   4  -3  252.37   12.70
  -3   4   3  240.58   13.60
   3  -4   3  229.68   13.50
  -3   4   3  250.57   13.80
   3  -4  -3  236.08   13.40
  -3   4  -3  237.58   14.10
  -3  -4   3  237.58   13.50
  -3   4  -3  236.58   13.40
   3   4   3  247.68   13.30
   3   4   3  246.58   13.90
  -3   4  -3  243.48   13.50
   3  -4  -3  257.17   12.50
  -3  -4   3  259.07   13.60
  -3   4  -3  260.07   15.50
   3   4   3  263.87   14.10
  -3  -4   3  268.67   12.80
   3  -4  -3  245.38   12.40
  -4   4   3  141.69   10.40
   4  -4   3  139.59   10.30
   4   4  -3  153.28    9.90
   4  -4   3  162.28   10.60
  -4   4   3  167.28   10.90
  -4  -4  -3  148.29   10.70
  -4   4   3  163.28   10.80
   4   4  -3  157.48    9.10
   4  -4  -3  143.79    8.60
   4   4   3  153.48    9.80
   4   4   3  144.79   10.50
  -4  -4   3  173.18    9.20
  -4   4  -3  148.49   10.40
  -4  -4   3  150.68   10.10
  -4   4  -3  152.28   10.30
  -4   4  -3  143.09   10.90
   4  -4  -3  151.58   10.20
  -4  -4   3  139.79   10.10
  -5   4   3  123.49   10.00
  -5   4   3  106.69    8.00
  -5  -4  -3  142.89   10.60
  -5  -4  -3  118.89    9.80
  -5   4   3  111.69   11.00
   5   4  -3  120.89    7.70
   5   4  -3  139.19    9.60
  -5   4   3  145.89   10.70
  -5  -4   3  117.59    9.80
  -5  -4   3  125.09    7.90
  -5   4  -3  122.49   10.60
  -5   4  -3  123.29    9.90
  -5   4  -3  108.89    9.20
   5   4   3  130.19    9.00
   5  -4  -3  132.29    9.80
  -5  -4   3  107.29    9.20
   5  -4  -3  130.49    7.70
   5   4   3  126.69   10.10
  -6   4   3  523.35   27.10
  -6  -4  -3  496.35   26.90
   6   4  -3  505.45   23.40
  -6   4   3  554.54   28.00
  -6  -4  -3  505.95   26.80
   6  -4   3  489.95   26.60
  -6   4   3  499.35   24.70
  -6   4  -3  542.75   26.60
   6   4   3  551.54   27.50
   6   4   3  528.35   24.90
  -6   4  -3  552.64   27.50
  -6   4  -3  528.65   28.20
  -6  -4   3  512.45   26.30
  -6  -4   3  555.04   27.40
  -7   4   3   36.10    5.90
  -7   4   3   33.20    7.00
  -7  -4  -3   52.29    8.60
  -7   4   3   39.70    7.40
  -7  -4  -3   43.00    7.60
  -7  -4   3   39.30    6.80
  -7   4  -3   39.60    7.00
  -7  -4   3   34.80    7.00
  -7   4  -3   35.30    7.30
   7   4   3   44.00    6.10
  -7   4  -3   27.40    7.10
  -8   4   3   84.89   11.30
  -8   4   3  108.99   13.60
  -8  -4  -3   93.89   11.50
  -8  -4   3   95.79   12.00
  -8  -4   3  101.49   11.70
  -8   4  -3  104.19   12.90
  -8   4  -3  111.29   12.00
   0   5   3  534.45   25.50
   0  -5  -3  537.65   25.60
   0   5  -3  534.35   25.20
   0  -5   3  574.24   25.70
   0   5   3  587.44   26.10
   0   5  -3  528.75   25.90
   0  -5  -3  592.74   25.10
   0   5   3  551.34   25.00
   0   5   3  573.94   25.60
   0  -5   3  549.95   25.60
   0  -5  -3  544.35   25.40
   1   5  -3  232.18   13.40
  -1   5   3  225.48   12.40
  -1   5   3  205.18   12.60
  -1   5   3  231.28   12.50
  -1  -5  -3  222.98   12.90
   1   5  -3  223.38   12.40
  -1   5   3  229.98   13.00
   1  -5   3  247.08   13.00
   1  -5   3  223.98   12.90
  -1  -5  -3  235.28   12.80
  -1  -5  -3  246.08   12.50
   1  -5  -3  220.28   12.20
   1   5   3  235.78   13.00
  -1   5  -3  231.28   13.40
  -1   5  -3  200.18   12.30
   1   5   3  219.58   12.20
  -1  -5   3  225.18   12.80
  -1  -5   3  231.38   12.70
   1  -5  -3  223.28   12.80
   1  -5  -3  244.28   14.20
   1   5   3  214.38   12.60
   1   5   3  229.78   12.60
  -2  -5  -3  288.27   15.90
  -2  -5  -3  298.67   16.30
   2  -5   3  310.87   16.30
  -2   5   3  298.47   15.80
  -2   5   3  324.57   15.70
  -2   5   3  296.57   16.20
  -2   5   3  312.77   16.30
   2   5  -3  323.07   15.80
   2  -5   3  279.97   16.00
  -2   5  -3  252.77   16.10
  -2  -5   3  306.37   15.90
   2   5   3  292.77   15.80
   2  -5  -3  329.97   16.20
   2   5   3  309.07   16.30
  -2   5  -3  344.17   16.50
   2   5   3  303.37   16.50
  -2  -5   3  295.47   15.90
   3   5  -3  374.36   19.40
  -3   5   3  421.36   20.60
   3  -5   3  390.16   20.20
  -3   5   3  411.86   20.10
  -3  -5  -3  369.06   20.00
   3  -5   3  413.96   20.50
   3   5  -3  363.86   18.70
  -3   5   3  405.26   20.30
   3   5   3  367.66   19.90
   3  -5  -3  385.76   19.80
   3   5   3  371.66   19.30
  -3  -5   3  393.46   20.00
  -3   5  -3  393.46   20.60
  -3   5  -3  408.66   20.20
  -3  -5   3  381.16   19.60
  -4   5   3   30.50    5.50
  -4   5   3   52.89    7.10
   4   5  -3   44.10    5.30
  -4   5   3   27.20    5.50
  -4  -5  -3   38.20    6.10
   4   5  -3   35.10    5.30
   4  -5   3   37.50    5.90
  -4  -5   3   38.50    5.90
   4   5   3   22.60    4.50
   4  -5  -3   35.20    5.60
  -4   5  -3   37.80    6.30
  -4   5  -3   33.20    5.70
  -4  -5   3   55.29    6.80
   4   5   3   28.60    5.50
  -5  -5  -3  888.51   38.90
  -5   5   3  844.32   38.70
  -5   5   3  855.61   38.50
   5  -5   3  826.92   38.40
  -5  -5  -3  811.82   38.10
   5   5  -3  860.91   35.90
  -5  -5   3  829.82   38.30
  -5   5  -3  807.32   37.50
  -5   5  -3  801.42   38.10
   5   5   3  793.72   38.00
  -5   5  -3  806.12   39.10
   5  -5  -3  701.13   37.00
   5   5   3  791.62   36.50
  -6   5   3   59.89    8.90
   6   5  -3   66.49    6.70
  -6  -5  -3   59.89    9.00
   6  -5   3   81.49    9.60
  -6  -5  -3   49.70    7.90
  -6   5   3   72.29    9.40
   6   5   3   71.29    9.20
  -6   5  -3   81.89    9.40
  -6   5  -3   49.30    8.20
   6   5   3   63.29    7.50
  -6   5  -3   70.89    9.20
  -6  -5   3   83.69    9.90
  -7  -5  -3   38.70    7.10
  -7  -5  -3   34.00    7.50
  -7   5   3   47.10    8.40
  -7   5   3   42.40    8.00
  -7  -5   3   47.10    8.10
  -7  -5   3   35.80    7.10
   7   5   3   40.20    6.10
  -7   5  -3   43.40    8.50
  -7   5  -3   36.20    7.00
   0  -6   3  512.15   24.90
   0   6   3  481.15   24.30
   0  -6  -3  534.15   25.10
   0   6  -3  498.55   25.40
   0  -6   3  512.25   24.80
   0   6  -3  499.55   24.40
   0   6   3  528.15   25.00
   0   6   3  556.34   25.50
   0   6   3  504.45   24.20
  -1  -6  -3  759.12   37.00
  -1   6   3  893.11   38.00
   1  -6   3  812.02   37.40
   1   6  -3  829.32   38.00
  -1   6   3  810.32   36.60
  -1   6   3  832.92   37.40
   1   6  -3  842.72   36.90
  -1   6   3  797.92   36.70
   1  -6   3  875.61   37.60
  -1   6  -3  829.22   37.90
  -1  -6   3  797.72   37.10
  -1  -6   3  870.41   37.40
   1   6   3  729.53   36.80
   1   6   3  870.01   37.40
   1   6   3  868.71   36.90
  -1   6  -3  828.72   37.20
   1   6   3  942.41   38.40
   1  -6  -3  834.82   37.30
  -2   6   3  175.68   11.50
  -2   6   3  187.68   12.00
   2   6  -3  167.18   11.30
   2  -6   3  170.68   11.80
  -2   6   3  210.08   12.70
   2  -6   3  179.38   12.00
  -2  -6  -3  181.48   12.10
   2   6  -3  174.58   12.40
   2  -6  -3  180.78   11.90
  -2   6  -3  175.98   11.70
  -2  -6   3  176.08   11.90
   2   6   3  192.58   12.30
  -2   6  -3  175.08   12.40
  -2  -6   3  193.38   12.00
   2   6   3  184.88   11.60
  -3   6   3    0.30    2.60
  -3  -6  -3    9.50    3.90
  -3   6   3    4.90    3.40
  -3   6   3    7.10    3.70
   3  -6   3    9.30    3.70
   3   6  -3    6.50    3.10
  -3   6  -3    3.70    3.40
  -3  -6   3    5.30    3.30
   3   6   3   10.00    3.90
  -3  -6   3    5.70    3.10
   3   6   3    4.00    3.10
   3  -6  -3    1.70    2.80
  -3   6  -3    1.80    2.80
   4  -6   3  211.78   14.80
  -4  -6  -3  232.98   15.30
  -4   6   3  226.68   14.70
  -4   6   3  258.27   15.50
   4   6  -3  226.48   13.50
  -4  -6   3  215.48   14.50
   4  -6  -3  231.38   14.70
   4   6   3  239.78   15.10
  -4   6  -3  244.58   16.00
  -4   6  -3  246.38   15.10
   4   6   3  211.98   13.90
   5   6  -3   34.90    5.40
  -5   6   3   36.60    6.70
  -5   6   3   46.70    7.60
  -5  -6  -3   40.10    7.00
   5  -6   3   22.60    5.50
   5   6   3   23.70    5.20
  -5   6  -3   26.30    6.00
   5   6   3   30.90    6.50
  -5  -6   3   33.10    6.60
  -5   6  -3   43.40    7.70
  -6   6   3   69.99   10.20
  -6  -6  -3   64.29    9.50
  -6   6   3   83.09   10.60
  -6  -6  -3   84.19   10.80
  -6   6  -3   98.19   12.00
   6   6   3   92.99    9.40
  -6  -6   3   88.09   10.70
  -7   6   3   71.99   10.80
  -7   6   3   41.30    8.60
  -7  -6  -3   63.49    9.40
  -7  -6   3   72.09   10.40
  -7  -6   3   68.89    9.90
  -7   6  -3   76.19   11.20
   7   6   3   72.99    8.90
   0   7   3   30.10    5.20
   0  -7  -3   36.50    6.00
   0   7   3   32.40    5.40
   0  -7   3   37.20    6.00
   0  -7   3   23.80    5.10
   0   7  -3   18.10    4.60
   0   7   3   34.20    5.90
   0   7  -3   25.90    5.20
  -1   7   3  157.68   11.40
  -1   7   3  137.19   10.20
   1  -7   3  144.79   10.90
   1  -7   3  133.19   10.60
  -1  -7  -3  141.59   10.60
   1   7  -3  154.58   11.60
   1   7  -3  127.99   10.10
  -1   7   3  127.69    9.90
  -1   7  -3  141.19   11.20
   1  -7  -3  157.18   10.80
   1   7   3  134.79   10.30
   1   7   3  136.69   10.30
   1   7   3  144.29   11.00
  -1  -7   3  135.79   10.70
  -1  -7   3  141.79   10.80
  -1   7  -3  137.59   10.60
  -2   7   3   78.49    9.00
   2  -7   3   69.19    8.40
  -2   7   3   55.69    7.50
   2   7  -3   56.49    8.30
   2   7  -3   79.39    8.50
  -2  -7  -3   73.99    8.80
  -2   7  -3   87.69    9.00
  -2  -7   3   83.39    9.00
   2   7   3   67.39    8.00
  -2   7  -3   66.39    8.60
   2  -7  -3   67.39    8.00
   2   7   3   81.69    8.90
  -3  -7  -3   75.79    9.30
   3  -7   3   70.39    9.00
  -3   7   3   77.29    9.00
  -3   7   3   64.19    8.50
   3  -7  -3   68.29    8.50
  -3   7  -3   86.19   10.20
   3   7   3   74.69    9.10
   3   7   3   78.49    8.60
  -3  -7   3   68.89    8.70
  -3   7  -3   77.69    8.90
  -4   7   3   75.99    9.30
  -4   7   3   65.89    8.90
  -4  -7  -3   70.19    9.30
   4  -7   3   64.49    8.90
  -4   7  -3   58.89    9.00
  -4   7  -3   68.49    9.00
   4   7   3   73.19    9.50
   4   7   3   69.69    8.10
  -4  -7   3   64.19    8.90
  -5  -7  -3   38.30    7.60
  -5   7   3   46.10    8.10
  -5   7   3   45.30    7.90
   5  -7   3   39.60    7.70
   5   7   3   51.39    7.40
  -5   7  -3   41.10    8.30
  -5  -7   3   37.60    7.30
  -6   7   3  105.09   12.50
  -6   7   3   94.99   12.30
  -6  -7  -3  108.09   12.80
  -6   7  -3  106.69   13.10
   6   7   3  114.89   11.50
  -6  -7   3  108.29   12.80
   0   8   3  656.63   31.80
   0   8   3  608.14   31.80
   0   8   3  645.04   31.20
   0  -8  -3  684.23   32.50
   0   8  -3  657.83   32.70
   0  -8   3  640.04   32.10
  -1   8   3   60.49    8.20
  -1  -8  -3   60.29    8.20
   1   8  -3   79.09    9.80
  -1   8   3   65.49    8.20
   1  -8   3   74.19    9.20
  -1   8  -3   58.69    8.60
  -1  -8   3   60.59    8.40
   1   8   3   61.99    8.60
   1   8   3   66.59    8.70
   1  -8  -3   61.59    8.40
   1   8   3   59.79    7.80
  -2  -8  -3  190.68   14.00
  -2   8   3  187.18   13.30
  -2   8   3  183.08   14.00
   2  -8   3  181.48   13.80
   2   8   3  184.28   13.90
  -2  -8   3  192.78   13.90
  -2   8  -3  203.28   14.30
   2   8   3  189.98   13.70
   3  -8   3   96.19   11.40
  -3  -8  -3  110.89   12.20
  -3   8   3  109.69   11.70
  -3   8   3   88.99   10.30
  -3  -8   3  108.09   11.60
   3   8   3  106.09   11.20
   3   8   3   98.09   11.00
  -3   8  -3  112.09   12.20
  -4   8   3  112.09   12.40
  -4   8   3   79.09   10.40
   4  -8   3  104.79   12.00
  -4  -8  -3  105.19   12.20
  -4   8  -3  116.39   13.00
  -4  -8   3  102.59   12.00
   4   8   3  117.59   11.60
  -5   8   3    0.30    4.10
  -5   8   3   -1.20    3.90
  -5  -8   3    4.10    4.70
   5   8   3    6.70    4.20
  -5   8  -3    4.40    4.20
   0   9   3    5.40    3.80
   0  -9   3    1.30    4.10
   0   9   3    9.50    4.70
   0   9   3   -0.60    3.60
   0   9  -3    9.10    4.70
   1  -9   3   -1.50    3.50
  -1   9   3    1.00    4.10
  -1   9   3    3.90    3.70
   1   9  -3   -2.70    3.80
  -1   9  -3    2.10    4.00
   1   9   3    1.90    3.40
   1   9   3    0.70    3.80
  -1  -9   3   -1.80    2.30
   1   9   3    4.50    4.30
  -2   9   3   39.00    7.80
   2  -9   3   36.60    7.70
  -2   9   3   27.80    6.50
  -2  -9   3   39.00    7.70
  -2   9  -3   34.00    7.50
   2   9   3   52.69    8.50
   3  -9   3  130.29   13.90
  -3   9   3  135.79   14.20
  -3   9   3  153.48   12.80
   3   9   3  148.99   14.30
  -3  -9   3  162.78   13.50
  -3   9  -3  151.18   15.30
  -4   9   3   13.40    5.40
  -4  -9   3   14.40    5.80
  -4   9  -3    4.50    5.00
   4   9   3    9.20    4.90
   0 -10   3  157.98   13.60
   0  10  -3  167.38   16.50
   0  10   3  164.98   13.50
   1  10  -3  170.38   15.00
  -1  10   3  168.38   13.70
   1 -10   3  166.88   16.30
  -1  10  -3  182.48   14.80
  -1 -10   3  173.48   16.60
  -2  10   3   83.99   10.80
  -2 -10   3   88.69   11.80
  -2  10  -3   67.59   10.90
   1   0   4 5601.74  214.58
  -1   0  -4 5243.48  213.98
  -1   0   4 5508.75  213.88
   1   0   4 5448.65  214.88
  -1   0  -4 5627.44  215.08
  -1   0  -4 5518.75  214.78
  -1   0   4 5553.94  213.78
   1   0   4 5818.32  214.18
  -2   0   4 1462.85   54.59
  -2   0   4 1424.86   55.89
   2   0   4 1415.66   56.89
  -2   0   4 1393.66   55.89
  -2   0  -4 1448.56   56.49
   2   0   4 1362.76   56.49
  -2   0  -4 1405.16   56.79
   2   0   4 1405.16   56.59
  -2   0   4 1429.46   55.39
  -2   0  -4 1459.25   56.59
   2   0  -4 1424.26   55.69
   2   0  -4 1360.76   55.59
  -3   0  -4  159.58    8.70
  -3   0  -4  138.49    8.50
   3   0   4  158.68    8.90
   3   0  -4  152.88    7.90
   3   0   4  152.68    8.00
  -3   0  -4  140.89    8.50
  -3   0   4  139.89    8.10
  -3   0   4  148.49    8.10
   3   0   4  147.89    8.60
  -3   0   4  146.59    7.50
   3   0  -4  152.98    7.80
   3   0   4  136.09    8.60
   4   0   4   84.89    5.90
  -4   0  -4   91.19    6.80
   4   0   4   87.89    6.90
  -4   0  -4   90.29    7.00
   4   0   4   91.39    7.00
  -4   0   4   74.59    6.20
  -4   0   4   90.59    6.50
  -4   0   4   81.39    5.60
  -4   0  -4   85.29    6.60
   5   0   4  135.69    9.70
  -5   0  -4  126.69    9.40
   5   0   4  135.59    8.20
   5   0  -4  131.69    8.70
  -5   0   4  136.79    9.30
  -5   0  -4  131.59    9.20
  -5   0   4  139.69    9.20
  -5   0   4  123.89    8.10
   5   0   4  118.69    9.30
  -6   0  -4   61.19    7.70
   6   0   4   75.09    8.40
  -6   0  -4   77.69    8.70
   6   0   4   80.59    6.10
  -6   0   4   69.39    6.90
  -6   0   4   81.09    8.50
   6   0  -4   63.29    7.10
  -7   0  -4  118.89   11.80
  -7   0  -4  122.39   11.60
   7   0   4  126.69   12.00
  -7   0   4   97.69   10.70
   7   0   4  105.59    7.90
  -7   0   4  109.39    8.60
  -8   0  -4   74.29    9.80
  -8   0  -4   66.29    9.40
  -8   0   4   65.39    8.10
  -8   0   4   64.89    9.20
   0   1  -4  255.57   11.30
   0   1   4  249.68   10.80
   0  -1  -4  247.18   10.60
   0  -1  -4  252.67   10.60
   0  -1   4  253.17   10.40
   0   1   4  244.18   10.70
   0  -1  -4  254.67   10.60
   0   1  -4  257.67   10.30
   0   1   4  248.98   11.10
   0  -1   4  264.47   11.10
   0   1  -4  250.37   10.30
   0  -1   4  247.08   10.50
   0  -1   4  261.27   11.30
   0  -1  -4  241.28   11.10
  -1   1   4 2199.38   87.79
  -1   1   4 2267.87   87.79
   1  -1   4 2375.36   88.69
   1  -1   4 2336.47   88.69
  -1  -1  -4 2288.47   88.39
   1  -1   4 2313.07   88.19
   1   1  -4 2260.57   87.49
   1   1  -4 2307.87   87.29
  -1   1   4 2184.48   87.69
   1  -1   4 2372.06   88.29
  -1  -1  -4 2310.07   88.19
  -1  -1  -4 2246.58   88.49
  -1   1  -4 2305.27   88.69
  -1  -1   4 2135.89   88.59
   1  -1  -4 2223.48   87.69
   1   1   4 2205.08   88.49
  -1  -1   4 2258.07   87.49
  -1   1  -4 2112.19   88.49
  -1  -1   4 2270.27   87.59
   1  -1  -4 2250.77   87.79
   1   1   4 2288.37   88.29
  -1   1  -4 2353.46   88.19
   1  -1  -4 2261.17   87.59
   1   1   4 2114.79   88.19
   2   1  -4  233.98   10.70
  -2  -1  -4  228.58   11.70
   2  -1   4  222.88   11.50
  -2   1   4  229.98   10.00
  -2   1   4  207.98   11.00
   2   1  -4  244.38   10.70
  -2  -1  -4  241.98   11.60
   2  -1   4  252.37   11.90
  -2   1   4  229.38   10.00
  -2  -1  -4  251.97   11.70
  -2   1   4  225.48   11.10
  -2  -1  -4  232.08   11.40
  -2   1  -4  239.28   11.80
  -2   1  -4  232.08   11.70
  -2  -1   4  247.68   10.20
  -2  -1   4  256.57   11.00
  -2   1  -4  244.48   11.50
   2   1   4  246.68   11.70
   2  -1  -4  254.67   10.10
   2  -1  -4  248.28   10.10
   2  -1  -4  265.17   11.00
   2  -1  -4  253.37   11.00
   2   1   4  253.57   11.60
  -2   1  -4  257.67   11.70
  -2  -1   4  231.78   10.90
   2   1   4  251.07   11.70
   2   1   4  239.38   11.80
  -3  -1  -4 1357.66   51.39
   3  -1   4 1300.27   51.29
  -3   1   4 1287.47   49.40
  -3   1   4 1268.27   50.69
   3  -1   4 1263.07   51.19
  -3  -1  -4 1269.67   51.19
   3   1  -4 1340.17   50.29
  -3  -1  -4 1077.79   50.89
   3  -1   4 1179.48   50.99
   3   1  -4 1297.47   50.19
  -3   1   4 1249.38   50.59
   3  -1  -4 1177.18   48.30
  -3   1  -4 1185.78   51.09
   3   1   4 1248.38   51.29
  -3  -1   4 1129.09   50.29
   3  -1  -4 1264.57   49.40
   3   1   4 1233.78   50.49
  -3  -1   4 1255.47   50.49
   3   1   4 1352.76   51.59
   3  -1  -4 1248.18   50.29
  -3  -1   4 1144.59   48.40
   3   1   4 1252.77   51.19
  -3   1  -4 1273.87   51.09
  -3   1  -4 1260.57   51.29
  -4  -1  -4  225.28   12.20
  -4  -1  -4  203.28   11.80
   4  -1   4  216.88   11.90
  -4  -1  -4  213.88   12.00
   4  -1   4  199.48   11.80
  -4   1   4  204.68   10.30
  -4   1   4  197.68   11.40
  -4   1   4  202.98   11.50
   4  -1  -4  214.78   11.30
  -4   1  -4  215.98   11.90
  -4  -1   4  197.08   11.30
   4   1   4  213.58   10.90
   4   1   4  226.08   12.10
  -4  -1   4  208.58   10.90
   4   1   4  191.28   11.70
  -4   1  -4  194.48   11.50
  -4  -1   4  200.28   11.30
  -4   1  -4  211.38   12.00
   5  -1   4  586.34   26.90
  -5   1   4  513.55   26.00
  -5  -1  -4  595.44   27.00
   5   1  -4  558.04   25.50
   5  -1   4  562.84   26.70
  -5   1   4  531.55   24.60
  -5  -1  -4  561.34   26.60
  -5   1   4  599.84   26.60
  -5  -1   4  580.04   26.30
   5  -1  -4  569.44   25.80
   5   1   4  573.94   26.80
  -5  -1   4  491.05   24.90
  -5   1  -4  551.44   26.70
  -5   1  -4  582.54   26.60
   5   1   4  570.54   25.00
  -5  -1   4  517.75   25.90
   5   1   4  597.34   27.10
   6  -1   4  139.09   10.80
   6   1  -4  167.38   10.40
  -6  -1  -4  150.48   11.00
  -6   1   4  147.19   10.80
   6  -1   4  152.58    9.20
  -6  -1  -4  155.48   11.30
  -6   1   4  139.39    9.20
  -6   1   4  139.09   10.60
  -6   1  -4  115.29   10.20
  -6   1  -4  142.29   10.70
   6   1   4  141.59   10.90
  -6  -1   4  150.28    9.90
   6  -1  -4  139.69    9.90
  -6  -1   4  167.88   11.10
  -6  -1   4  135.79   10.40
   6   1   4  141.69    9.00
  -7   1   4  104.49   11.00
  -7  -1  -4  104.29   11.30
   7  -1   4  109.49   11.40
  -7   1   4  117.99    8.90
  -7  -1  -4  122.29   11.80
   7  -1   4   94.59    7.60
   7   1   4  117.59   11.60
  -7   1  -4  118.09   11.40
  -7  -1   4  103.09   10.90
  -7  -1   4   90.49    9.20
  -7   1  -4  141.19   10.80
   7   1   4  103.29    7.80
  -8   1   4   61.39    7.70
  -8  -1  -4   52.09    8.30
  -8   1   4   40.60    7.70
  -8  -1  -4   62.49    9.40
  -8   1  -4   48.40    8.10
  -8  -1   4   52.19    8.30
  -8  -1   4   50.99    7.40
   0  -2  -4   41.20    2.60
   0  -2  -4   45.00    3.30
   0   2   4   47.70    3.50
   0   2  -4   48.80    4.00
   0  -2   4   44.60    3.20
   0  -2  -4   42.20    3.40
   0   2   4   36.60    3.60
   0  -2   4   41.10    3.60
   0   2  -4   42.70    3.00
   0   2  -4   40.20    3.00
   0   2   4   42.60    2.60
   0   2   4   45.00    3.40
   0  -2   4   43.50    3.20
  -1   2   4  454.35   19.20
   1  -2   4  464.25   19.70
  -1  -2  -4  456.15   19.40
  -1  -2  -4  482.35   18.70
   1  -2   4  431.96   19.30
   1  -2   4  448.56   19.30
   1   2  -4  398.86   18.50
  -1   2   4  449.06   19.00
  -1  -2  -4  442.06   19.50
  -1  -2  -4  478.25   19.70
   1   2  -4  408.06   19.70
  -1   2   4  475.05   18.80
  -1   2   4  465.65   19.30
   1   2  -4  434.96   18.70
   1  -2   4  464.25   20.00
  -1  -2   4  485.45   20.00
  -1   2  -4  439.36   19.80
   1   2   4  485.95   19.70
  -1  -2   4  396.96   18.80
   1  -2  -4  439.86   19.00
  -1   2  -4  442.06   19.60
  -1   2  -4  468.05   19.30
   1   2   4  453.15   19.50
  -1  -2   4  444.16   18.90
   1  -2  -4  457.75   19.00
   1   2   4  415.66   19.40
   2   2  -4 2779.42  106.59
  -2   2   4 2719.33  107.09
  -2  -2  -4 2845.92  107.49
  -2   2   4 2751.92  107.19
   2  -2   4 2855.61  107.69
   2  -2   4 2803.82  107.99
   2  -2   4 2650.33  107.39
  -2   2   4 2685.13  106.09
  -2  -2  -4 2479.85  107.29
   2   2  -4 2648.64  106.49
   2  -2   4 2850.51  107.59
  -2  -2  -4 2896.51  107.29
  -2  -2  -4 2608.64  107.39
   2  -2  -4 2736.43  106.09
  -2  -2   4 2919.61  108.19
   2  -2  -4 2829.62  105.79
  -2   2  -4 2650.23  107.29
  -2  -2   4 2826.82  106.89
   2   2   4 2565.54  107.09
  -2   2  -4 2532.95  107.79
   2   2   4 2772.62  107.59
  -2  -2   4 2643.04  106.79
  -2   2  -4 2726.23  107.59
  -2  -2   4 2724.63  106.19
   2   2   4 2696.83  107.59
  -2   2  -4 2567.14  107.29
   2  -2  -4 2880.81  106.99
  -3  -2  -4 1974.10   77.39
   3  -2   4 1882.11   77.29
  -3  -2  -4 1781.82   77.09
  -3   2   4 1925.21   75.39
  -3   2   4 2010.50   77.19
  -3   2   4 1902.91   76.89
  -3  -2  -4 2047.50   76.79
   3  -2   4 1932.21   77.39
   3   2  -4 1929.31   76.39
  -3  -2  -4 1906.31   77.39
   3  -2  -4 1835.92   76.49
  -3  -2   4 1864.81   76.69
   3  -2  -4 1941.21   76.59
  -3   2  -4 1940.81   77.89
   3   2   4 2035.60   77.59
  -3  -2   4 1873.81   75.09
   3   2   4 1901.11   76.59
  -3   2  -4 1911.81   77.29
   3  -2  -4 1971.70   75.09
  -3   2  -4 1894.51   77.09
  -3   2  -4 2041.60   77.59
   3  -2  -4 1937.21   75.29
  -3  -2   4 1851.41   76.49
   3   2   4 1771.92   77.19
  -4  -2  -4  228.88   13.00
  -4   2   4  241.58   12.90
  -4   2   4  239.88   11.30
  -4  -2  -4  218.98   11.90
  -4  -2  -4  226.48   13.00
  -4   2   4  246.38   13.00
   4  -2   4  249.08   13.30
   4  -2   4  230.58   12.90
  -4  -2  -4  230.98   13.10
  -4   2  -4  216.18   13.10
  -4  -2   4  242.18   12.50
   4  -2  -4  198.18   12.00
  -4  -2   4  221.88   10.30
   4   2   4  219.48   12.90
  -4   2  -4  230.58   12.90
  -4   2  -4  220.88   12.80
   4   2   4  233.88   12.10
  -4  -2   4  228.98   12.60
   4  -2  -4  247.48   11.40
   4  -2  -4  238.28   10.30
  -4   2  -4  222.38   13.10
   4   2   4  237.68   13.20
  -5   2   4  462.15   23.10
   5  -2   4  504.75   23.80
  -5  -2  -4  474.25   23.50
  -5   2   4  481.35   21.40
   5   2  -4  478.25   22.40
  -5   2   4  481.25   23.30
  -5  -2  -4  478.65   23.60
   5  -2   4  466.75   23.40
  -5   2  -4  489.85   23.60
  -5   2  -4  469.95   24.10
   5   2   4  456.35   23.20
  -5  -2   4  512.15   19.70
  -5   2  -4  464.25   23.10
   5  -2  -4  459.85   19.30
   5  -2  -4  452.85   22.40
   5   2   4  469.85   21.80
  -5  -2   4  525.25   23.40
   5  -2  -4  444.36   21.00
  -5  -2   4  417.96   21.90
  -5  -2   4  444.16   22.90
  -6   2   4  518.05   24.10
  -6   2   4  501.15   26.10
   6  -2   4  482.75   26.10
  -6  -2  -4  494.55   26.00
  -6  -2  -4  484.15   26.20
  -6  -2   4  526.85   26.30
  -6   2  -4  554.44   26.80
   6  -2  -4  596.04   28.50
  -6   2  -4  508.45   26.00
   6   2   4  550.54   26.80
  -6  -2   4  553.64   25.40
   6   2   4  536.05   24.40
   7  -2   4  158.08   10.20
  -7   2   4  185.68   13.10
  -7   2   4  161.28   10.60
  -7  -2  -4  173.38   12.80
  -7  -2  -4  168.28   13.00
   7  -2   4  160.78   12.60
  -7  -2   4  167.38   12.70
   7   2   4  156.08   12.50
  -7   2  -4  141.89   11.80
  -7  -2   4  143.29   11.10
  -7   2  -4  154.08   12.60
   7   2   4  169.18   10.50
  -8  -2  -4  107.79   11.80
  -8  -2  -4  109.29   14.50
  -8   2   4  102.99   10.00
  -8   2   4   89.09   11.30
  -8   2  -4   84.79   11.30
  -8   2  -4  112.29   12.00
  -8  -2   4   92.29   10.10
  -8  -2   4   90.89   11.10
   0  -3   4   67.99    4.90
   0  -3  -4   64.69    4.90
   0   3   4   67.19    4.90
   0  -3   4   71.69    5.00
   0   3  -4   78.39    5.10
   0  -3  -4   65.89    4.80
   0  -3   4   75.59    5.70
   0   3   4   65.79    4.30
   0   3   4   64.89    5.00
   0  -3  -4   76.19    4.40
   0   3   4   72.59    5.00
   0  -3  -4   73.89    5.10
   0   3  -4   69.79    5.60
  -1  -3  -4  560.44   24.10
   1   3  -4  554.74   24.70
  -1   3   4  555.34   24.00
   1   3  -4  633.14   23.80
  -1  -3  -4  565.04   23.30
  -1   3   4  552.44   23.30
   1  -3   4  535.25   24.00
  -1   3   4  559.74   23.70
   1  -3   4  556.94   24.00
   1  -3   4  580.44   24.80
  -1  -3  -4  592.34   24.20
  -1   3   4  583.24   24.20
  -1  -3  -4  546.45   24.10
   1  -3   4  580.94   24.40
   1  -3  -4  554.84   23.60
  -1  -3   4  553.34   24.60
   1  -3  -4  538.85   23.70
   1   3   4  554.64   24.30
   1  -3  -4  527.25   23.20
  -1  -3   4  527.85   23.60
   1  -3  -4  555.34   23.90
  -1  -3   4  535.25   23.60
  -1   3  -4  591.54   24.10
  -1   3  -4  541.15   24.60
   1   3   4  531.75   24.00
  -1   3  -4  494.65   23.60
   1   3   4  560.64   24.20
  -1  -3   4  472.45   23.40
  -2  -3  -4  134.39    7.30
   2  -3   4  122.69    7.60
   2  -3   4  107.89    8.50
   2  -3   4  115.59    7.30
  -2  -3  -4  118.69    6.80
   2   3  -4  116.99    6.80
  -2   3   4  102.59    6.90
  -2   3   4  101.99    6.80
  -2   3   4  104.29    7.00
  -2  -3  -4  111.49    7.30
  -2   3   4  107.49    6.30
   2  -3   4  110.29    7.30
  -2  -3  -4  115.99    7.10
  -2  -3   4  105.39    6.70
  -2   3  -4  101.99    7.40
   2   3   4  101.79    7.20
  -2   3  -4  102.29    6.90
  -2  -3   4  112.69    6.50
  -2   3  -4   95.69    7.10
   2   3   4  106.39    7.00
   2  -3  -4  107.69    6.80
   2   3   4  104.89    7.10
   2  -3  -4  106.09    6.30
   2  -3  -4  101.39    5.90
  -2  -3   4  103.79    8.10
   2  -3  -4   96.29    6.70
  -2   3  -4  115.09    7.30
  -2  -3   4   92.89    6.60
  -3   3   4   14.00    3.10
  -3  -3  -4   18.50    3.60
   3  -3   4   15.50    3.40
  -3  -3  -4   14.30    3.00
  -3   3   4   17.00    3.10
  -3  -3  -4   18.60    3.50
  -3   3   4   19.30    3.60
   3  -3   4   14.80    3.40
  -3  -3  -4   20.70    3.70
   3   3  -4    4.80    1.80
   3   3   4   15.20    3.40
  -3   3  -4   10.70    3.00
   3  -3  -4   16.70    2.40
  -3   3  -4   15.30    3.30
   3   3   4   10.80    2.70
   3  -3  -4   19.80    3.40
  -3  -3   4   10.80    2.80
  -3   3  -4   11.80    3.40
   3  -3  -4   14.60    2.40
  -3   3  -4   10.50    2.90
  -3  -3   4   12.00    2.20
  -3  -3   4   15.10    2.90
   3   3   4   19.20    3.70
  -4   3   4  533.65   24.90
  -4   3   4  516.15   22.90
  -4  -3  -4  542.35   25.30
  -4   3   4  508.15   24.60
   4  -3   4  496.35   24.90
  -4  -3  -4  513.95   25.00
   4  -3   4  503.55   24.80
  -4  -3  -4  499.35   24.70
   4   3  -4  548.15   24.10
  -4   3  -4  557.94   25.10
  -4  -3   4  514.95   24.40
  -4   3  -4  515.15   24.80
  -4  -3   4  562.04   22.70
  -4   3  -4  538.45   25.80
   4   3   4  509.55   23.90
  -4  -3   4  561.04   24.90
   4  -3  -4  534.75   23.00
   4   3   4  537.35   25.10
   4  -3  -4  533.95   24.50
   4   3   4  487.25   24.80
   4  -3  -4  533.15   22.40
  -5   3   4  132.29    9.90
  -5  -3  -4  136.69    9.90
   5   3  -4  136.49    9.30
  -5  -3  -4  121.09    9.60
  -5   3   4  138.29    8.20
   5  -3   4  134.29    9.70
  -5   3   4  119.69    9.20
  -5   3  -4  121.49    9.60
  -5  -3   4  118.19    9.10
  -5   3  -4  122.79    9.20
  -5  -3   4  125.79    9.50
  -5   3  -4  107.29    9.50
   5   3   4  140.49    8.80
  -5  -3   4  128.89    7.10
   5  -3  -4  129.49    8.80
   5   3   4  106.69    9.40
   5  -3  -4  118.09    8.90
   5  -3  -4  121.09    6.90
   6  -3   4  179.18   12.50
  -6  -3  -4  187.48   13.20
  -6   3   4  189.48   11.00
  -6  -3  -4  191.78   12.80
  -6   3   4  191.58   12.90
  -6   3  -4  173.68   12.40
  -6  -3   4  165.38   12.30
  -6  -3   4  174.98   11.80
  -6   3  -4  154.28   12.30
   6   3   4  192.08   11.20
   6   3   4  171.98   12.40
  -6   3  -4  171.68   13.30
  -7  -3  -4  116.59   12.20
   7  -3   4  105.59   11.50
  -7   3   4  105.59   11.50
  -7  -3  -4  109.49   11.50
  -7   3   4  122.79    8.90
  -7   3  -4   95.59   11.10
  -7   3  -4  115.09   12.60
   7   3   4  123.09    8.70
  -7  -3   4  116.59   11.80
  -7  -3   4  105.09   10.50
   7   3   4  117.69   12.10
  -7   3  -4  103.49   11.20
  -8   3   4    4.10    4.40
  -8  -3  -4    4.70    4.20
  -8  -3   4    5.50    3.80
  -8  -3   4    2.10    3.80
  -8   3  -4    3.70    4.50
  -8   3  -4    2.70    3.80
   0   4  -4  684.83   27.90
   0  -4  -4  660.43   28.00
   0  -4   4  643.54   27.90
   0  -4   4  653.23   27.90
   0   4   4  627.64   28.00
   0  -4  -4  622.84   27.80
   0   4  -4  615.14   28.50
   0  -4   4  632.14   27.90
   0  -4  -4  648.84   27.10
   0   4   4  660.13   28.40
   0   4   4  643.24   27.90
   0  -4  -4  637.04   28.00
   0   4  -4  651.93   27.70
   0   4   4  578.64   26.90
   1   4  -4  592.54   27.60
   1  -4   4  622.04   27.00
   1  -4   4  624.34   27.00
  -1   4   4  659.53   27.30
  -1  -4  -4  682.23   27.30
   1   4  -4  596.34   26.50
  -1   4   4  609.54   26.30
  -1  -4  -4  568.04   26.90
  -1  -4  -4  617.34   26.10
  -1   4   4  584.84   26.90
  -1   4   4  570.24   26.40
  -1  -4  -4  633.84   26.90
   1  -4   4  599.34   26.80
   1   4  -4  594.24   26.30
   1   4   4  564.34   26.80
  -1  -4   4  568.14   26.60
   1   4   4  609.74   27.00
  -1   4  -4  580.54   26.50
   1  -4  -4  627.64   26.90
   1   4   4  596.54   27.20
  -1   4  -4  633.54   27.00
   1   4   4  573.34   26.00
   1  -4  -4  590.94   26.80
   1  -4  -4  624.54   26.20
   1  -4  -4  616.04   26.50
  -1  -4   4  652.23   26.90
  -1  -4   4  655.13   26.70
   2   4  -4  171.08    9.50
  -2   4   4  154.68    9.10
  -2   4   4  176.28    9.70
  -2  -4  -4  165.68   10.10
  -2   4   4  163.58   10.00
  -2  -4  -4  154.88    9.80
   2  -4   4  154.78    9.90
  -2  -4  -4  150.68    9.20
  -2   4   4  149.69    9.80
   2  -4   4  153.28    9.70
   2   4   4  172.28   10.30
  -2   4  -4  166.48    9.90
  -2  -4   4  179.08    9.50
   2  -4  -4  159.88    9.70
   2  -4  -4  175.58    9.00
   2   4   4  164.98   10.00
   2  -4  -4  159.28    9.20
   2   4   4  172.88   10.40
  -2  -4   4  176.78    9.80
  -2  -4   4  175.78   10.00
  -2   4  -4  170.78   10.10
  -2   4  -4  173.68   10.80
  -3   4   4  116.59    8.50
  -3   4   4  123.29    8.70
  -3  -4  -4  112.69    8.40
   3  -4   4  122.39    8.80
   3  -4   4  117.99    8.70
  -3   4   4  111.99    8.30
   3   4  -4  107.69    7.70
  -3  -4  -4  121.09    8.50
   3   4   4  128.59    9.00
   3   4   4  133.19    8.60
  -3  -4   4  130.69    7.70
  -3   4  -4  136.59    9.60
   3  -4  -4  128.99    7.50
  -3  -4   4  112.49    8.30
   3  -4  -4  111.49    7.10
   3   4   4  132.79    9.00
   3  -4  -4  122.69    8.40
  -3   4  -4  125.29    8.70
  -3   4  -4  131.19    8.60
  -3  -4   4  117.09    8.10
  -4   4   4  115.89    8.80
  -4   4   4   96.19    8.30
   4  -4   4  104.59    8.60
  -4  -4  -4   97.89    8.50
  -4   4   4  111.69    8.70
   4  -4   4  101.09    8.50
   4   4  -4  116.49    8.00
  -4  -4  -4   95.09    9.20
  -4  -4   4  108.29    8.10
   4  -4  -4  105.79    6.80
   4  -4  -4  108.29    8.20
  -4   4  -4  109.99    8.60
   4  -4  -4  105.89    7.00
   4   4   4   94.69    7.70
  -4   4  -4  106.99    9.30
  -4  -4   4  100.19    6.80
   4   4   4  108.69    8.50
  -4  -4   4   90.39    7.90
  -4   4  -4  104.39    8.50
   5   4  -4  717.93   31.60
  -5   4   4  746.03   32.80
  -5   4   4  653.93   32.00
  -5  -4  -4  667.93   32.40
  -5  -4  -4  602.34   31.50
  -5   4   4  706.63   32.60
   5   4   4  679.33   32.50
  -5  -4   4  645.24   29.00
  -5  -4   4  686.33   32.10
  -5   4  -4  620.04   32.70
   5  -4  -4  686.63   29.00
  -5   4  -4  641.64   31.90
   5  -4  -4  680.33   31.50
  -5  -4   4  799.82   32.50
   5   4   4  646.44   30.60
  -5   4  -4  656.33   31.70
  -6   4   4  158.68   10.10
  -6   4   4  168.08   12.40
  -6  -4  -4  137.89   11.20
   6  -4   4  146.59   11.90
  -6   4   4  159.48   12.60
  -6  -4  -4  154.18   12.20
   6   4   4  154.98   12.10
  -6   4  -4  164.08   12.00
  -6   4  -4  160.88   12.20
  -6  -4   4  136.79   11.00
   6   4   4  152.58   10.50
  -6   4  -4  148.69   12.20
  -6  -4   4  145.99   11.70
  -7  -4  -4   98.09   11.10
  -7   4   4   88.29    8.80
   7  -4   4   89.79   10.40
  -7   4   4   93.39   10.90
  -7   4   4   96.09   11.80
  -7  -4  -4  102.39   11.60
  -7  -4   4   84.99   10.50
  -7   4  -4   83.79   10.20
  -7   4  -4   84.69   11.60
   7   4   4   86.19    8.80
  -7  -4   4   97.39   10.30
  -8   4   4   94.69   12.70
  -8  -4  -4  104.79   12.50
  -8   4   4   83.79   11.50
  -8   4  -4  110.99   13.60
  -8   4  -4  110.99   12.50
  -8  -4   4   97.59   12.10
  -8  -4   4  102.89   11.60
   0   5  -4  394.06   20.20
   0   5  -4  380.46   19.10
   0  -5   4  372.56   19.50
   0   5   4  367.46   19.30
   0   5   4  399.86   19.80
   0   5   4  404.66   18.90
   0  -5  -4  444.16   19.10
   0  -5  -4  417.36   19.80
   0   5   4  443.56   20.20
   0  -5   4  406.46   19.60
   1   5  -4  641.94   30.90
  -1   5   4  640.74   30.30
  -1  -5  -4  700.53   29.50
   1  -5   4  709.53   30.60
  -1  -5  -4  700.73   30.60
  -1   5   4  663.73   30.60
  -1   5   4  663.63   29.90
   1   5  -4  671.93   29.70
   1  -5   4  619.24   30.00
  -1   5   4  641.64   29.40
   1   5   4  702.33   30.50
  -1  -5   4  658.03   30.10
  -1  -5   4  649.43   30.10
   1   5   4  736.43   31.00
   1  -5  -4  702.73   29.60
   1   5   4  681.53   29.50
  -1   5  -4  723.43   30.30
   1   5   4  672.93   30.50
   1  -5  -4  641.74   30.10
  -1   5  -4  684.33   31.00
  -2   5   4   85.59    8.10
  -2   5   4   65.39    6.50
   2   5  -4   68.39    7.70
   2  -5   4   84.89    6.80
  -2  -5  -4   62.19    6.90
  -2   5   4   74.09    6.30
  -2   5   4   65.89    7.00
   2   5  -4   72.19    6.20
   2  -5   4   73.29    7.40
   2   5   4   72.89    7.50
  -2   5  -4   80.79    6.70
   2   5   4   86.69    8.10
   2  -5  -4   80.79    6.70
  -2   5  -4   71.09    7.80
   2   5   4   67.59    6.80
   2  -5  -4   74.99    7.20
  -2  -5   4   70.79    7.00
  -2  -5   4   60.39    6.70
  -3   5   4  274.07   15.10
  -3   5   4  266.77   15.30
  -3   5   4  288.37   15.80
   3   5  -4  276.37   14.70
   3  -5   4  250.27   15.00
   3  -5   4  298.77   15.90
  -3  -5  -4  273.17   15.60
   3  -5  -4  260.47   14.90
   3   5   4  277.97   15.10
  -3   5  -4  266.87   15.20
  -3   5  -4  232.98   15.60
  -3  -5   4  296.27   15.30
   3   5   4  261.57   15.40
   3   5   4  267.87   15.40
  -3  -5   4  264.37   15.20
   4   5  -4  346.87   18.00
  -4   5   4  347.27   19.00
  -4  -5  -4  339.87   19.10
   4  -5   4  385.96   19.40
  -4   5   4  347.67   18.90
  -4   5   4  372.26   19.50
  -4  -5   4  351.36   18.80
   4   5   4  327.67   18.80
   4   5   4  330.57   18.00
   4  -5  -4  309.37   18.00
  -4   5  -4  333.37   18.60
  -4   5  -4  314.37   19.40
  -4  -5   4  357.96   18.60
   5  -5   4  148.39   12.00
  -5  -5  -4  167.88   12.40
  -5   5   4  152.78   11.90
  -5  -5  -4  147.19   11.80
  -5   5   4  180.08   12.30
  -5   5  -4  156.88   12.40
  -5   5  -4  156.18   11.60
  -5  -5   4  169.18   12.20
  -5   5  -4  183.88   12.40
   5   5   4  169.98   11.20
   5   5   4  150.08   11.90
  -6   5   4  234.58   16.00
  -6  -5  -4  212.08   15.10
  -6   5   4  230.88   16.20
   6  -5   4  241.08   15.90
  -6  -5  -4  261.47   16.80
  -6   5  -4  224.18   16.00
  -6   5  -4  230.48   15.50
   6   5   4  246.18   16.30
   6   5   4  225.08   14.20
  -6   5  -4  262.67   17.60
  -6  -5   4  227.68   15.70
  -7   5   4  179.28   14.40
  -7  -5  -4  183.98   14.40
  -7   5   4  177.58   14.80
  -7   5  -4  208.68   14.60
  -7  -5   4  178.58   14.30
  -7   5  -4  160.38   16.50
   7   5   4  168.48   12.00
  -7  -5   4  178.58   13.70
   0   6   4  977.20   45.20
   0   6  -4  984.60   45.90
   0   6   4 1163.88   46.30
   0   6  -4 1045.80   44.90
   0  -6   4 1071.49   45.40
   0   6   4  969.90   44.70
   0   6   4 1043.40   44.30
   0  -6  -4 1049.99   45.40
   0  -6   4 1072.09   45.40
  -1   6   4  604.04   26.90
  -1  -6  -4  601.44   27.80
  -1   6   4  554.54   26.90
  -1   6   4  555.24   27.50
   1   6  -4  567.24   26.90
   1   6  -4  578.74   28.30
  -1   6   4  611.84   28.10
   1  -6   4  590.94   27.80
   1  -6   4  640.84   27.90
  -1  -6   4  611.54   27.60
  -1   6  -4  581.34   28.20
   1   6   4  560.64   27.40
   1   6   4  585.24   27.50
  -1  -6   4  540.55   27.20
  -1   6  -4  542.25   26.90
   1   6   4  563.64   26.50
   1   6   4  590.34   28.00
   1  -6  -4  558.64   27.30
  -2   6   4  127.29    9.10
   2   6  -4  135.89    9.30
  -2  -6  -4  118.89    9.50
   2  -6   4  130.29    9.70
  -2   6   4  128.19    9.10
  -2   6   4  120.49    9.60
   2  -6   4  122.29    9.60
   2   6  -4   99.69    9.20
  -2   6   4  118.49    9.50
   2  -6  -4  131.79    9.60
   2   6   4  126.99    9.30
  -2  -6   4  119.09    9.20
  -2   6  -4  114.99    9.10
   2   6   4  137.39    9.80
  -2  -6   4  125.49    9.50
  -2   6  -4  118.19    9.70
  -3   6   4  405.56   21.40
  -3  -6  -4  398.56   21.90
   3  -6   4  434.16   22.30
   3   6  -4  442.86   21.30
  -3   6   4  404.66   22.00
   3  -6   4  424.26   22.10
  -3   6   4  442.86   22.30
   3   6   4  384.46   21.00
   3  -6  -4  396.36   21.40
  -3   6  -4  420.66   21.70
  -3   6  -4  433.26   22.90
  -3  -6   4  382.76   21.40
  -3  -6   4  429.56   21.70
   3   6   4  415.76   22.00
  -4  -6  -4   13.10    4.40
   4  -6   4   23.10    5.30
  -4   6   4   18.40    4.80
  -4   6   4   17.30    4.90
  -4  -6   4   19.50    4.80
  -4   6  -4   21.20    5.80
   4  -6  -4   17.80    4.50
   4   6   4   22.30    5.30
  -4   6  -4   21.90    5.30
   4   6   4   13.40    4.30
  -5   6   4   86.89   10.20
   5  -6   4   77.69    9.50
  -5   6   4   80.49    9.80
  -5  -6  -4   72.29    9.70
  -5  -6  -4   72.29    9.30
   5   6   4  102.29    9.80
  -5   6  -4   87.19   11.00
   5   6   4   98.19   10.70
  -5   6  -4   97.19   10.70
  -5  -6   4   94.69   10.50
  -6  -6  -4  153.98   13.10
  -6   6   4  132.59   13.80
  -6  -6  -4  151.58   12.30
  -6   6   4  140.39   14.00
   6   6   4  137.39   11.20
  -6  -6   4  158.48   12.90
  -6   6  -4  163.48   14.10
  -7  -6  -4  158.88   15.80
  -7   6   4  172.18   14.60
  -7   6   4  175.88   15.10
   7   6   4  163.08   12.30
  -7  -6   4  179.58   14.30
  -7   6  -4  180.98   15.90
  -7  -6   4  175.18   14.70
   0   7   4  159.68   10.80
   0   7  -4  169.78   11.50
   0   7   4  174.38   12.20
   0   7   4  160.88   11.60
   0  -7   4  180.48   12.10
   0  -7   4  153.78   11.50
   0   7  -4  172.68   12.20
   0  -7  -4  147.89   11.40
  -1   7   4  278.77   16.30
  -1  -7  -4  270.97   16.00
   1   7  -4  260.37   16.50
   1  -7   4  272.27   15.70
   1   7  -4  248.98   15.00
  -1   7   4  232.98   14.60
   1  -7   4  249.68   15.60
  -1   7   4  262.57   15.50
  -1   7  -4  248.18   15.90
  -1  -7   4  294.87   16.30
  -1  -7   4  234.28   15.10
   1   7   4  257.97   14.80
   1  -7  -4  256.27   15.70
   1   7   4  278.67   16.30
   1   7   4  247.58   15.40
  -1   7  -4  264.57   15.50
  -2  -7  -4   42.50    6.60
   2   7  -4   38.50    6.70
   2  -7   4   32.10    6.10
  -2   7   4   37.00    6.10
  -2   7   4   25.80    5.50
   2   7   4   26.80    5.60
  -2   7  -4   34.40    6.10
   2  -7  -4   25.90    5.60
   2   7   4   42.70    6.70
  -2   7  -4   28.10    5.40
  -2  -7   4   25.30    5.50
   3  -7   4  147.79   11.40
  -3   7   4  146.79   11.70
  -3   7   4  152.88   11.40
  -3  -7  -4  152.68   11.90
  -3   7  -4  140.49   11.30
  -3  -7   4  139.39   11.10
  -3   7  -4  145.79   11.80
   3   7   4  153.58   11.50
   3   7   4  148.59   11.50
  -4   7   4  209.18   15.70
  -4   7   4  286.57   16.80
   4  -7   4  240.08   16.30
  -4  -7  -4  211.98   15.80
   4   7   4  260.27   16.60
  -4  -7   4  250.27   16.20
   4   7   4  236.48   15.50
  -4   7  -4  276.27   17.80
  -5  -7  -4  144.99   13.90
  -5   7   4  132.99   13.50
  -5   7   4  122.69   13.10
   5  -7   4  127.49   13.30
  -5   7  -4  144.79   14.90
   5   7   4  147.69   11.50
  -5  -7   4  122.09   12.90
  -6   7   4  179.58   14.80
  -6   7   4  178.48   14.80
  -6  -7  -4  176.88   14.00
   6   7   4  159.68   12.70
  -6  -7   4  167.28   14.10
  -6   7  -4  189.48   15.40
   0  -8   4  287.07   18.00
   0   8  -4  307.57   19.20
   0   8   4  309.07   18.40
   0   8   4  318.47   17.80
   0   8   4  312.87   18.80
   0  -8  -4  309.17   18.50
  -1   8   4  112.89   11.60
  -1   8   4  101.99   10.20
   1  -8   4  101.79   10.80
   1   8  -4  103.49   11.70
  -1   8   4  101.89   10.60
  -1  -8  -4   96.09   10.70
   1   8   4  104.89   11.10
   1   8   4  120.59   11.30
   1   8   4  100.09   10.10
  -1   8  -4  110.89   11.70
   1  -8  -4   96.09   10.60
  -1  -8   4   92.59   10.50
  -2   8   4   75.89    9.00
   2   8  -4   79.59   10.40
  -2   8   4   93.79   10.60
  -2  -8  -4   81.99    9.70
   2  -8   4   82.19   10.00
  -2  -8   4   66.69    9.00
   2   8   4   73.89    9.40
  -2   8  -4   64.19    9.40
   2   8   4   75.69    9.40
   3  -8   4   32.00    6.80
  -3   8   4   40.00    7.30
  -3  -8  -4   32.70    6.90
  -3   8   4   49.99    7.50
  -3  -8   4   29.00    6.60
   3   8   4   31.80    6.70
  -3   8  -4   43.00    8.10
   3   8   4   28.70    6.50
   4  -8   4   31.10    7.00
  -4   8   4   36.90    7.50
  -4   8   4   40.30    7.40
  -4  -8   4   44.80    7.70
   4   8   4   52.49    8.20
  -4   8  -4   38.40    7.60
  -5   8   4    1.80    4.20
  -5   8   4    0.50    3.80
   5   8   4    3.80    4.20
  -5   8  -4   -2.30    4.20
  -5  -8   4    8.40    4.90
   0   9   4  299.07   18.20
   0   9   4  298.97   19.30
   0   9   4  320.67   19.30
   0   9  -4  278.47   19.20
   0  -9   4  298.17   19.30
  -1   9   4  348.77   21.30
   1   9  -4  356.66   21.80
  -1   9   4  318.67   19.50
   1  -9   4  359.96   21.40
  -1  -9   4  319.07   20.60
   1   9   4  329.77   20.20
  -1   9  -4  339.37   21.50
   1   9   4  329.77   19.80
   1   9   4  354.26   21.30
  -2   9   4   52.19    9.00
  -2   9   4   55.69    8.30
   2  -9   4   43.10    7.60
   2   9   4   41.40    7.80
  -2  -9   4   46.80    8.30
  -2   9  -4   52.99    9.20
  -3   9   4   87.39   11.30
  -3   9   4   70.39    9.70
   3  -9   4   81.29   10.80
  -3   9  -4   86.59   11.20
   3   9   4   68.49    9.50
  -3  -9   4   90.09   11.10
  -4   9   4    0.20    4.80
  -4   9   4    5.50    4.50
  -4   9  -4   10.20    5.00
  -4  -9   4    4.50    4.90
   4   9   4   13.40    5.50
   0  10  -4    9.10    5.70
   0 -10   4   16.30    6.00
   0  10   4   24.70    6.10
   1  10  -4   57.69   10.20
  -1  10   4   75.19    9.70
   1 -10   4   56.49    9.40
  -1  10  -4   64.59   10.20
  -1 -10   4   56.19    9.40
   0   0   5   -0.20    0.90
   0   0   5    0.80    0.50
   0   0   5    1.20    0.40
   0   0   5   -0.70    0.70
   0   0  -5    1.00    0.90
   0   0  -5    0.40    1.00
  -1   0   5  116.09    5.20
  -1   0  -5  116.09    6.10
   1   0   5   99.89    5.90
   1   0   5  116.59    6.10
  -1   0  -5  123.19    6.60
  -1   0  -5  117.29    5.90
   1   0   5  124.79    6.50
  -1   0  -5  117.49    6.00
  -1   0   5  115.69    5.20
  -1   0   5  115.79    5.30
   2   0   5   12.60    2.30
   2   0  -5   13.50    1.50
   2   0  -5   13.50    1.50
   2   0   5   12.80    2.20
  -2   0   5   11.00    1.70
   2   0   5   10.80    2.40
  -2   0  -5    7.60    2.20
  -2   0  -5   13.40    2.20
  -2   0   5   12.10    1.20
  -2   0   5   10.50    1.70
   3   0   5 1857.81   71.59
   3   0   5 1902.21   71.49
  -3   0  -5 1733.53   70.89
  -3   0   5 1687.53   70.29
   3   0   5 1748.82   70.69
   3   0   5 1742.43   71.19
  -3   0   5 1668.83   70.29
   3   0  -5 1698.33   69.79
  -3   0  -5 1754.82   71.39
   3   0  -5 1762.52   69.89
  -3   0   5 1898.31   69.59
  -4   0  -5  945.71   43.20
   4   0   5 1007.30   42.50
  -4   0  -5 1032.70   43.70
   4   0  -5 1048.30   42.40
  -4   0   5  977.60   42.80
   4   0   5 1062.29   43.90
  -4   0   5 1035.00   41.80
   4   0   5 1033.50   43.70
  -4   0   5 1066.69   43.00
  -5   0  -5  610.94   29.00
   5   0   5  624.54   29.10
  -5   0   5  598.54   26.90
   5   0   5  615.94   29.00
  -5   0   5  611.74   28.40
  -5   0  -5  651.63   29.10
   5   0   5  601.54   27.30
  -5   0   5  640.64   28.50
   6   0   5   38.20    6.30
   6   0  -5   48.80    8.80
  -6   0  -5   43.00    6.70
  -6   0   5   35.20    5.80
   6   0   5   45.00    5.30
  -6   0  -5   34.60    5.60
  -6   0   5   49.80    5.60
   7   0   5   12.70    3.60
   7   0   5   15.60    4.80
  -7   0   5    7.20    3.90
  -7   0  -5    9.30    4.30
  -7   0   5   16.40    3.90
  -7   0  -5   22.20    5.10
  -8   0   5   58.29    7.60
  -8   0  -5   49.60    8.40
  -8   0   5   39.90    7.60
   0  -1  -5    8.00    1.30
   0  -1   5    4.60    1.00
   0  -1   5    7.70    1.70
   0   1   5    6.60    1.20
   0   1  -5    6.60    1.60
   0  -1  -5    8.40    1.20
   0   1  -5    8.20    0.80
   0  -1   5    9.00    1.60
   0   1   5    6.40    1.20
   0  -1   5    6.70    1.00
   0   1   5    6.60    1.50
   0   1  -5    6.10    1.60
   0  -1  -5    5.60    1.10
   0   1  -5    7.80    0.80
   0  -1  -5    6.50    1.50
  -1  -1  -5 5468.85  207.78
  -1  -1  -5 5578.84  207.48
   1  -1   5 5192.88  207.88
  -1  -1  -5 5613.94  208.08
  -1  -1  -5 4693.93  207.18
  -1   1   5 5348.37  207.98
  -1   1   5 5423.76  207.58
   1  -1   5 5564.54  207.98
   1  -1   5 5448.85  207.88
  -1   1   5 5211.78  207.78
   1  -1   5 5567.14  207.98
  -1   1  -5 5428.96  207.98
   1   1   5 5802.62  207.88
  -1  -1   5 5279.97  207.88
   1   1   5 5339.77  207.58
   1  -1  -5 5267.37  206.88
   1  -1  -5 5021.60  206.78
  -1   1  -5 5535.05  207.98
   1   1   5 5314.77  207.88
   1  -1  -5 5262.67  207.08
  -1   1  -5 5390.46  207.18
  -1   1  -5 5424.26  208.08
   1   1   5 5541.15  207.58
  -1  -1   5 5171.78  207.68
  -1  -1   5 5335.67  207.68
  -2  -1  -5  109.69    6.40
   2  -1   5   97.39    6.20
  -2   1   5  101.89    5.10
  -2   1   5  112.79    6.00
   2   1  -5  105.69    5.30
   2   1  -5  101.39    5.30
  -2  -1  -5  107.29    6.40
  -2   1   5   99.59    4.50
  -2  -1  -5  105.39    6.30
  -2  -1  -5  107.89    6.70
   2  -1   5  105.09    6.50
  -2   1   5  108.79    5.90
  -2   1  -5  103.69    6.60
  -2  -1   5  100.49    5.60
   2   1   5  129.89    6.90
   2   1   5  100.69    6.30
   2  -1  -5  105.69    5.50
  -2   1  -5  111.09    6.30
   2  -1  -5  101.29    5.60
  -2   1  -5  120.69    6.60
   2   1   5  111.99    6.40
  -2   1  -5  108.39    6.70
   2  -1  -5  110.89    5.10
  -2  -1   5  106.69    5.70
   2   1   5  114.89    6.60
   3  -1   5 1930.01   74.79
  -3  -1  -5 1966.80   74.69
  -3  -1  -5 1744.33   74.59
   3   1  -5 1826.22   73.19
  -3   1   5 1788.62   73.79
   3   1  -5 1858.81   73.19
   3  -1   5 1977.70   76.19
  -3  -1  -5 1760.92   74.39
   3  -1   5 1781.52   74.49
  -3   1   5 1894.41   72.49
  -3   1   5 1900.51   73.99
  -3   1  -5 1736.83   74.59
  -3   1  -5 1849.81   74.79
   3   1   5 1826.32   73.99
   3   1   5 1757.72   74.49
   3   1   5 1969.70   74.89
   3  -1  -5 1878.31   71.59
  -3  -1   5 1844.92   73.79
  -3  -1   5 1804.52   71.69
  -3   1  -5 1970.20   74.79
   3  -1  -5 1868.41   73.49
  -3  -1   5 1798.02   73.59
  -3   1  -5 1822.62   74.39
   3  -1  -5 1946.71   73.49
  -4   1   5  716.63   29.50
  -4   1   5  650.83   27.60
  -4  -1  -5  673.23   29.90
  -4   1   5  589.04   28.80
   4   1  -5  684.13   28.60
   4  -1   5  665.33   29.90
  -4  -1  -5  640.84   29.80
   4  -1   5  646.14   29.80
  -4  -1  -5  634.24   29.70
   4   1   5  667.53   28.90
   4   1   5  681.13   30.00
  -4  -1   5  669.03   28.40
  -4   1  -5  678.43   29.90
  -4  -1   5  630.74   29.00
  -4  -1   5  596.34   28.70
  -4   1  -5  761.72   30.40
  -4   1  -5  699.33   30.00
   4   1   5  679.13   30.00
  -5   1   5   52.19    6.20
  -5   1   5   44.80    5.60
   5  -1   5   56.89    6.90
   5  -1   5   42.70    5.90
  -5  -1  -5   44.50    6.10
  -5   1   5   42.60    4.50
  -5  -1  -5   39.50    5.90
  -5  -1   5   43.10    5.60
  -5  -1   5   38.10    5.30
   5   1   5   49.20    6.40
   5   1   5   45.20    6.20
  -5   1  -5   37.20    5.70
  -5  -1   5   43.60    5.00
   5  -1  -5   44.80    5.40
  -5   1  -5   40.60    5.90
   5   1   5   50.79    5.50
   6  -1   5  101.79    7.40
  -6   1   5   95.99    8.20
  -6  -1  -5  100.09   10.00
  -6   1   5  100.29    7.30
  -6  -1  -5   97.19   10.00
   6  -1   5   80.39    9.20
  -6   1   5   88.29   13.00
  -6  -1   5   98.69    8.50
   6   1   5   99.59    7.40
   6   1   5   82.59    9.30
  -6   1  -5  101.79    9.90
  -6  -1   5  114.89   12.50
  -6  -1   5   99.19    7.80
  -6   1  -5  116.99    9.50
  -7  -1  -5  209.98   14.80
  -7  -1  -5  218.88   14.50
  -7   1   5  210.28   14.50
  -7   1   5  214.08   12.60
   7  -1   5  210.48   14.40
   7  -1   5  194.48   12.10
  -7   1  -5  226.28   14.80
  -7  -1   5  194.18   12.60
   7   1   5  200.08   14.20
  -7   1  -5  235.68   15.20
   7   1   5  206.28   12.40
  -7  -1   5  201.98   14.10
  -8   1   5   15.40    4.50
  -8  -1  -5   15.10    5.60
  -8   1   5   16.30    5.30
  -8  -1   5   11.10    4.30
  -8  -1   5   18.30    5.50
  -8   1  -5   14.90    5.20
   0   2   5 1749.53   67.29
   0  -2  -5 1730.83   67.49
   0  -2  -5 1656.13   66.99
   0  -2   5 1769.42   67.99
   0  -2   5 1624.84   66.89
   0   2   5 1744.23   67.59
   0  -2  -5 1681.13   65.89
   0   2  -5 1703.63   66.59
   0   2   5 1637.94   67.09
   0  -2   5 1764.02   66.99
   0   2   5 1687.13   65.89
   0   2  -5 1651.93   67.89
   0   2  -5 1727.13   66.69
   1   2  -5    2.70    1.10
   1  -2   5    4.10    1.70
  -1  -2  -5    2.70    1.60
  -1  -2  -5    0.70    1.50
  -1   2   5    2.10    1.50
   1   2  -5    5.20    1.30
  -1   2   5    2.70    1.20
   1  -2   5    2.10    1.70
  -1   2   5   -0.50    1.30
   1   2  -5    3.30    2.10
  -1  -2  -5    3.50    1.60
   1  -2   5    1.10    1.30
  -1  -2  -5    2.20    1.10
   1  -2   5    3.00    1.70
  -1   2   5   -0.50    1.30
  -1  -2  -5    3.10    1.60
  -1   2  -5    1.20    1.50
  -1   2  -5    0.10    0.90
  -1   2  -5    3.00    1.60
  -1  -2   5    2.00    1.30
  -1  -2   5    2.90    1.30
   1  -2  -5    3.70    1.60
  -1  -2   5    4.10    2.00
   1   2   5    0.70    1.60
   1  -2  -5    2.40    1.40
   1  -2  -5    2.30    1.40
   1   2   5    2.30    1.80
  -1   2  -5    1.30    1.90
   1   2   5    1.70    1.60
  -2  -2  -5  777.52   33.90
  -2  -2  -5  824.52   33.90
  -2   2   5  770.02   32.60
   2  -2   5  801.72   33.80
   2   2  -5  777.62   32.70
   2  -2   5  842.92   34.20
  -2   2   5  759.12   33.30
   2   2  -5  862.01   32.90
  -2  -2  -5  764.32   33.80
   2  -2   5  850.71   34.50
   2  -2   5  784.62   33.80
  -2   2   5  795.12   33.50
  -2  -2  -5  874.01   34.10
  -2   2  -5  797.22   34.40
  -2   2  -5  863.51   33.90
   2  -2  -5  813.72   32.70
  -2  -2   5  825.92   32.70
  -2   2  -5  712.33   33.90
   2   2   5  826.82   33.90
  -2  -2   5  788.62   33.00
   2  -2  -5  818.02   31.90
   2  -2  -5  804.32   33.10
   2  -2  -5  792.52   33.20
   2   2   5  845.12   34.20
  -2   2  -5  806.42   33.60
   2   2   5  811.02   34.00
  -2  -2   5  786.32   33.20
  -2  -2   5  839.02   34.60
  -3   2   5  166.68    7.80
  -3  -2  -5  177.18    9.50
  -3  -2  -5  170.88    9.80
   3  -2   5  154.28    9.70
  -3  -2  -5  151.48    9.60
   3   2  -5  159.78    8.60
   3   2  -5  181.88    8.80
  -3   2   5  175.28    9.50
  -3   2   5  149.59    9.10
   3  -2   5  162.68    9.70
  -3  -2  -5  174.38    9.80
   3   2   5  167.58    9.50
   3   2   5  165.18    9.80
   3  -2  -5  167.58    9.00
  -3   2  -5  160.18    9.70
  -3   2  -5  154.88    9.80
   3  -2  -5  163.18    7.70
   3   2   5  163.48    9.80
  -3  -2   5  167.68    9.10
   3  -2  -5  151.78    7.70
  -3   2  -5  173.18    9.80
  -3  -2   5  158.78    7.80
  -3   2  -5  170.48    9.70
  -3  -2   5  164.78    9.00
  -4   2   5  120.19    8.40
  -4  -2  -5  129.99    9.00
   4  -2   5  115.49    8.40
  -4  -2  -5  115.69    8.50
  -4   2   5  125.49    8.40
   4   2  -5  117.99    7.60
   4  -2   5  125.09    8.80
  -4   2   5  129.39    6.80
  -4  -2  -5  117.29    8.50
   4  -2  -5  137.09    6.90
   4   2   5  110.99    7.70
   4  -2  -5  121.19    5.90
  -4   2  -5  104.79    8.60
  -4   2  -5  119.99    8.50
   4   2   5  123.29    8.60
  -4  -2   5  128.49    8.10
   4   2   5  112.49    8.30
  -4   2  -5  117.19    8.50
  -4  -2   5  135.39    6.20
  -4  -2   5  124.89    8.20
  -5   2   5  459.55   22.00
  -5  -2  -5  405.26   21.90
  -5   2   5  451.05   21.80
  -5   2   5  434.16   19.70
   5  -2   5  446.16   22.30
   5  -2   5  420.36   22.00
  -5  -2  -5  447.56   22.30
  -5  -2   5  413.36   21.30
  -5   2  -5  432.36   22.10
  -5   2  -5  421.16   21.90
   5   2   5  474.05   22.60
   5  -2  -5  452.05   21.20
   5  -2  -5  441.96   17.60
  -5  -2   5  443.66   20.90
  -5  -2   5  417.46   17.90
   5   2   5  440.96   22.30
   5   2   5  431.36   20.70
   5  -2  -5  501.85   20.00
  -5  -2   5  404.16   21.40
  -5   2  -5  372.36   22.00
  -6  -2  -5  476.55   24.70
  -6   2   5  487.35   24.50
   6  -2   5  492.55   24.90
  -6  -2  -5  482.15   24.90
  -6   2   5  484.95   22.10
  -6  -2   5  451.05   23.00
  -6  -2   5  481.45   24.40
   6   2   5  498.15   22.80
  -6   2  -5  444.96   25.00
   6   2   5  453.45   24.40
  -6   2  -5  491.75   24.70
  -6   2  -5  485.35   24.90
  -7   2   5   52.39    6.10
   7  -2   5   46.80    7.50
  -7  -2  -5   47.00    7.70
   7  -2   5   42.40    5.60
  -7   2   5   44.30    7.30
  -7  -2  -5   44.60    7.60
  -7  -2   5   46.50    7.50
   7   2   5   44.50    5.90
  -7   2  -5   42.00    7.30
  -7   2  -5   46.40    7.50
  -7  -2   5   42.60    6.60
  -7   2  -5   42.50    7.50
   7   2   5   40.00    7.10
  -8  -2  -5  433.06   23.70
  -8   2   5  345.77   22.10
  -8  -2   5  387.06   23.00
  -8  -2   5  379.96   21.20
  -8   2  -5  399.66   24.30
  -8   2  -5  379.36   22.60
   0   3  -5 1210.48   51.69
   0  -3  -5 1235.98   50.89
   0  -3  -5 1210.48   49.70
   0  -3   5 1298.67   51.99
   0   3  -5 1220.58   50.39
   0  -3  -5 1262.17   50.79
   0   3  -5 1289.87   50.59
   0   3   5 1304.37   51.29
   0  -3   5 1232.48   50.69
   0  -3   5 1208.28   50.69
   0   3   5 1244.18   49.80
   0   3   5 1314.37   51.29
   0   3   5 1270.37   51.19
   0  -3  -5 1344.37   51.29
  -1  -3  -5  892.71   39.80
  -1   3   5  929.51   39.60
   1   3  -5  959.90   39.30
   1   3  -5  940.01   39.10
  -1  -3  -5  957.20   40.10
   1  -3   5  979.80   40.40
   1  -3   5  947.11   40.70
  -1   3   5 1041.10   40.20
   1   3  -5  965.90   40.80
  -1   3   5  969.20   39.90
  -1  -3  -5 1024.60   38.90
   1  -3   5  947.91   39.90
  -1  -3  -5  949.51   39.90
   1  -3   5  951.30   39.90
  -1   3   5  960.00   39.00
   1   3   5 1003.90   40.40
   1  -3  -5  984.20   39.70
  -1  -3   5  992.80   39.60
   1  -3  -5 1018.00   39.70
  -1   3  -5  985.10   39.90
   1   3   5  925.71   40.00
   1   3   5  877.21   39.90
  -1   3  -5  878.31   39.50
  -1  -3   5  985.20   40.70
   1  -3  -5 1009.20   39.80
  -1  -3   5 1036.50   39.80
  -1  -3   5 1033.80   39.90
  -1   3  -5  909.41   40.50
   2   3  -5  966.00   40.70
  -2   3   5  972.80   41.00
  -2  -3  -5  892.51   41.60
  -2  -3  -5 1040.70   41.90
   2  -3   5  902.61   41.50
  -2   3   5  974.40   41.50
  -2   3   5  973.20   40.70
  -2  -3  -5 1040.50   41.00
  -2   3   5  994.30   41.60
   2   3  -5  986.70   40.80
  -2  -3  -5 1009.50   41.80
   2  -3   5  969.80   41.70
   2   3   5 1031.20   41.90
  -2  -3   5 1080.59   41.40
  -2  -3   5 1001.30   41.30
   2  -3  -5 1032.20   40.80
   2   3   5  954.50   41.80
   2  -3  -5  973.70   41.20
  -2   3  -5 1085.99   42.00
  -2   3  -5  984.50   42.50
  -2   3  -5  968.10   41.50
   2  -3  -5  990.30   40.00
   2  -3  -5 1050.59   41.30
  -2  -3   5  996.30   40.80
   2   3   5 1055.99   42.20
  -2   3  -5 1045.00   42.30
  -3  -3  -5  472.05   24.30
  -3  -3  -5  549.54   24.70
  -3   3   5  570.24   24.60
   3  -3   5  516.45   24.60
   3   3  -5  545.25   23.50
  -3   3   5  560.84   22.80
  -3   3   5  489.35   24.00
   3  -3   5  549.74   24.70
  -3  -3  -5  534.05   24.50
  -3   3   5  578.44   24.50
  -3  -3   5  601.34   24.20
  -3  -3   5  559.14   22.90
   3  -3  -5  538.75   22.40
   3  -3  -5  524.25   23.90
  -3   3  -5  503.45   25.00
   3   3   5  527.15   24.70
   3  -3  -5  534.05   22.70
  -3   3  -5  515.65   24.30
  -3   3  -5  533.75   24.70
  -3  -3   5  492.45   23.80
   3   3   5  513.35   24.70
   3   3   5  513.65   24.00
  -4   3   5  163.58   10.00
  -4  -3  -5  133.19    9.60
   4  -3   5  141.99    9.90
  -4  -3  -5  128.29    9.30
   4  -3   5  133.39    9.70
  -4   3   5  144.99    9.60
   4  -3  -5  139.59    9.00
   4  -3  -5  149.19    7.60
  -4   3  -5  133.09    9.50
  -4  -3   5  145.99    7.70
   4   3   5  126.29    8.80
  -4  -3   5  152.98    9.50
   4  -3  -5  133.39    7.60
  -4  -3   5  153.48    9.40
   4   3   5  146.29   10.00
  -4   3  -5  146.49    9.90
   4   3   5  140.39    9.90
  -4   3  -5  122.19    9.90
  -5   3   5   58.89    5.50
  -5   3   5   56.39    6.90
   5  -3   5   55.29    7.30
  -5  -3  -5   69.39    7.90
  -5   3   5   55.89    7.10
   5  -3   5   75.59    8.20
  -5  -3  -5   54.59    7.00
   5   3   5   62.69    7.70
  -5   3  -5   54.49    7.40
   5  -3  -5   63.19    4.20
  -5  -3   5   67.29    4.60
  -5  -3   5   63.39    7.10
   5   3   5   57.99    6.40
  -5  -3   5   67.19    7.30
   5  -3  -5   64.79    5.20
  -5   3  -5   70.39    8.00
   5  -3  -5   49.99    6.20
  -5   3  -5   69.59    7.70
  -6  -3  -5  602.94   30.70
  -6   3   5  555.84   29.80
  -6   3   5  608.34   27.60
  -6  -3  -5  656.73   31.10
   6  -3   5  632.64   30.60
   6   3   5  648.04   31.00
   6   3   5  623.94   28.60
  -6   3  -5  665.23   30.80
  -6  -3   5  625.84   30.30
  -6   3  -5  617.64   31.40
  -6  -3   5  597.24   29.20
  -6   3  -5  624.24   30.60
  -7   3   5   41.90    5.70
   7  -3   5   33.90    6.60
  -7  -3  -5   37.40    7.20
  -7  -3  -5   31.60    6.70
  -7   3   5   42.10    7.40
   7   3   5   51.09    6.30
  -7   3  -5   48.40    8.20
  -7   3  -5   57.39    8.50
   7   3   5   47.50    7.80
  -7  -3   5   39.60    6.40
  -7  -3   5   57.99    8.20
  -8  -3  -5   26.50    6.80
  -8   3   5   31.60    7.00
  -8  -3   5   25.00    6.60
  -8   3  -5   29.20    6.90
  -8  -3   5   27.60    6.10
  -8   3  -5   33.20    7.70
   0   4   5   21.40    2.90
   0   4  -5   25.50    3.40
   0   4  -5   25.20    3.50
   0  -4   5   29.20    3.80
   0   4  -5   27.60    4.40
   0  -4  -5   18.40    3.30
   0  -4  -5   30.90    4.00
   0   4   5   20.80    3.60
   0  -4   5   19.70    3.30
   0  -4  -5   30.30    3.30
   0  -4  -5   25.20    3.60
   0   4   5   28.20    4.00
   0   4   5   25.40    3.90
   0  -4   5   22.60    3.50
  -1  -4  -5   19.10    3.40
  -1   4   5   20.00    3.50
  -1   4   5   20.40    2.90
   1  -4   5   21.40    3.60
  -1   4   5   23.90    3.70
   1   4  -5   24.50    4.40
  -1   4   5   22.50    3.60
  -1  -4  -5   23.00    3.70
  -1  -4  -5   24.10    3.10
   1  -4   5   31.30    4.10
   1  -4  -5   24.60    3.50
   1  -4  -5   22.80    3.60
  -1   4  -5   27.90    4.40
   1   4   5   20.60    3.50
   1  -4  -5   22.00    3.00
   1   4   5   22.60    3.80
  -1   4  -5   24.30    3.60
  -1  -4   5   22.70    3.50
  -1  -4   5   23.00    3.50
   1   4   5   24.80    3.90
  -1  -4   5   23.10    3.40
  -1   4  -5   22.20    3.40
   1  -4  -5   30.10    3.80
  -2  -4  -5  365.76   18.40
  -2  -4  -5  400.16   17.70
   2  -4   5  369.16   18.40
  -2   4   5  368.46   17.70
  -2  -4  -5  383.46   18.40
  -2   4   5  363.96   17.50
  -2   4   5  410.46   18.80
  -2   4   5  379.96   18.50
   2  -4   5  399.36   18.70
  -2   4  -5  373.66   18.20
   2  -4  -5  370.96   17.50
   2   4   5  373.06   18.80
  -2  -4   5  350.56   18.00
   2   4   5  351.46   18.30
  -2   4  -5  364.86   19.10
   2   4   5  370.76   18.60
   2  -4  -5  381.46   17.00
  -2  -4   5  366.56   17.90
  -2  -4   5  409.96   17.90
   2  -4  -5  397.06   18.30
  -3   4   5  421.56   19.80
  -3   4   5  403.66   19.50
  -3   4   5  382.16   18.00
   3  -4   5  385.86   19.60
   3  -4   5  411.76   19.90
  -3   4   5  386.56   19.10
  -3  -4  -5  403.46   19.80
   3   4   5  390.06   19.70
  -3  -4   5  391.06   18.90
   3   4   5  389.06   19.80
   3  -4  -5  394.36   19.10
  -3  -4   5  405.46   18.20
  -3  -4   5  353.06   18.80
  -3   4  -5  350.46   19.00
  -3   4  -5  395.66   19.70
  -3   4  -5  350.06   20.00
   3   4   5  370.96   19.10
   3  -4  -5  407.46   18.20
   3  -4  -5  423.06   17.70
  -4   4   5  106.59    8.80
  -4  -4  -5  125.79    9.50
  -4  -4  -5  108.39    8.70
  -4   4   5  110.39    8.80
  -4   4   5  131.59    9.30
   4  -4   5  127.19    9.20
   4  -4   5  104.59    8.60
   4  -4  -5  123.09    7.30
   4   4   5  104.19    9.00
  -4  -4   5   94.09    8.20
   4   4   5  138.89    9.80
  -4   4  -5  116.39    9.40
  -4   4  -5  119.19    9.10
   4  -4  -5  127.39    7.50
   4  -4  -5  115.09    8.50
  -4   4  -5  108.99    8.70
  -4  -4   5  123.09    8.70
   4   4   5  121.69    8.70
  -4  -4   5  125.69    7.50
  -5  -4  -5  145.29   11.30
  -5   4   5  174.78   16.50
  -5  -4  -5  145.29   11.20
  -5   4   5  171.28   11.80
  -5   4   5  141.09   11.00
  -5   4  -5  141.09   11.40
  -5   4  -5  160.48   11.40
   5   4   5  143.09   10.20
  -5  -4   5  149.79   11.00
   5   4   5  158.08   11.70
   5  -4  -5  161.58   11.10
  -5  -4   5  154.88    8.90
  -5   4  -5  142.29   11.00
   6  -4   5   44.70    7.20
  -6   4   5   39.30    7.00
  -6  -4  -5   49.70    7.60
  -6   4   5   47.50    7.40
  -6  -4  -5   65.39    8.60
   6   4   5   43.00    6.30
   6   4   5   58.09    8.10
  -6   4  -5   54.89    7.90
  -6   4  -5   38.40    7.40
  -6  -4   5   54.29    7.70
  -6   4  -5   57.39    7.70
  -6  -4   5   45.10    6.60
  -7  -4  -5  175.18   13.90
  -7   4   5  169.58   14.20
   7  -4   5  170.48   13.30
  -7   4   5  177.88   13.40
  -7  -4   5  184.68   13.80
  -7   4  -5  177.68   13.60
  -7  -4   5  161.38   12.40
   7   4   5  173.98   12.10
  -7   4  -5  171.08   14.10
  -8   4   5  106.39   12.90
  -8   4   5  103.99   12.60
  -8  -4  -5   86.29   11.60
  -8   4  -5   99.99   12.00
  -8  -4   5   99.79   11.40
  -8   4  -5   97.89   13.10
  -8  -4   5   96.39   12.00
   0  -5   5    0.60    2.00
   0   5   5   -1.10    2.00
   0  -5   5    0.20    1.90
   0   5   5    6.60    2.80
   0   5  -5   -0.70    2.30
   0  -5  -5    1.30    1.50
   0   5   5    1.50    1.80
   0   5   5   -1.90    2.00
   0  -5  -5    1.20    1.60
   0   5  -5    2.20    1.90
  -1   5   5  355.96   18.40
  -1   5   5  340.47   17.20
   1  -5   5  370.36   18.40
  -1   5   5  352.26   18.00
  -1  -5  -5  340.87   17.00
   1   5  -5  347.77   19.00
   1   5  -5  364.86   17.70
   1  -5   5  354.76   18.20
  -1  -5  -5  335.37   18.10
  -1   5   5  388.26   18.80
   1   5   5  389.66   19.00
  -1   5  -5  367.66   17.90
   1   5   5  368.56   18.50
  -1  -5   5  365.56   18.20
   1  -5  -5  368.06   17.40
  -1   5  -5  369.86   19.10
   1  -5  -5  396.26   18.60
  -1  -5   5  385.66   18.20
   1   5   5  392.96   18.70
  -2  -5  -5  460.75   22.40
  -2   5   5  451.85   22.40
  -2   5   5  450.65   21.40
  -2  -5  -5  479.05   21.50
  -2   5   5  456.45   21.40
   2   5  -5  462.15   23.20
   2   5  -5  484.75   21.60
   2  -5   5  428.56   22.10
   2  -5   5  519.75   22.90
  -2   5   5  481.45   22.60
   2  -5  -5  456.15   21.90
   2   5   5  476.25   22.80
   2  -5  -5  399.96   20.40
  -2   5  -5  434.36   21.80
  -2   5  -5  434.56   22.80
   2   5   5  441.06   22.00
  -2  -5   5  439.76   21.80
   2   5   5  441.16   22.20
  -2  -5   5  472.65   21.90
  -3   5   5   86.49    7.40
  -3   5   5  101.79    8.20
   3  -5   5   70.69    8.00
  -3  -5  -5   94.99    8.10
  -3   5   5   88.09    8.80
   3   5  -5   92.39    7.10
   3  -5   5   95.69    8.10
  -3   5  -5   96.39    9.70
   3   5   5  101.79    8.50
   3  -5  -5   96.89    7.60
  -3  -5   5   79.79    8.10
   3   5   5   84.49    8.70
  -3  -5   5   84.69    7.30
   3   5   5   88.79    8.40
  -3   5  -5   88.99    7.60
   3  -5  -5   94.19    6.60
   4  -5   5 1087.39   44.60
  -4   5   5  999.50   44.00
  -4  -5  -5  930.31   43.80
  -4   5   5  973.80   43.70
   4  -5   5  972.50   43.80
   4   5  -5 1015.20   43.10
  -4   5   5  951.80   43.40
  -4   5  -5  908.21   44.40
   4   5   5  930.71   42.70
  -4  -5   5  942.71   43.20
   4   5   5  986.50   44.00
  -4  -5   5 1058.09   43.60
  -4   5  -5  996.80   43.60
   4  -5  -5  943.71   42.90
  -5  -5  -5   71.59    9.00
  -5  -5  -5   72.29    8.90
   5  -5   5   69.79    8.90
  -5   5   5   69.49    8.60
  -5   5   5   81.89    9.30
   5   5   5   82.59    9.60
  -5   5  -5   81.39    8.90
  -5  -5   5   68.29    8.40
   5   5   5   71.09    8.00
  -5   5  -5   76.49    8.70
  -5   5  -5   64.49    9.20
  -6  -5  -5  321.17   18.90
   6  -5   5  259.87   17.50
  -6  -5  -5  245.38   16.90
  -6   5   5  286.37   17.80
  -6   5   5  277.37   17.80
  -6   5  -5  301.27   18.00
  -6   5  -5  266.77   18.60
   6   5   5  266.87   16.00
  -6  -5   5  256.77   17.20
   6   5   5  277.67   18.00
  -7  -5  -5  112.29   12.00
  -7   5   5   82.39   10.80
  -7   5   5   83.19   11.30
  -7  -5   5   89.79   10.70
  -7   5  -5   85.19   11.90
  -7   5  -5   78.99   10.50
  -7  -5   5   89.79   11.00
   7   5   5   83.39    9.20
   0   6   5  695.23   30.60
   0   6   5  678.63   32.00
   0   6  -5  659.83   31.00
   0   6  -5  693.63   32.80
   0   6   5  745.53   32.50
   0  -6   5  742.93   32.10
   0  -6   5  646.54   31.50
   0  -6  -5  686.33   31.80
   0   6   5  678.73   31.60
  -1   6   5   54.49    6.50
   1   6  -5   46.10    7.00
   1  -6   5   62.39    7.10
  -1   6   5   44.30    5.60
  -1   6   5   49.50    6.70
   1   6  -5   57.09    6.20
  -1   6   5   57.69    6.80
  -1  -6  -5   52.79    6.70
   1  -6   5   54.89    6.80
   1   6   5   46.40    6.30
   1   6   5   56.49    7.00
   1   6   5   65.49    7.50
  -1   6  -5   47.90    6.70
  -1  -6   5   62.99    7.00
  -1   6  -5   52.59    6.20
   1  -6  -5   50.79    6.40
   1   6   5   51.79    5.80
  -1  -6   5   48.20    6.30
   2  -6   5   87.49    8.90
   2   6  -5   82.09    7.80
  -2   6   5   64.39    7.80
  -2   6   5   76.09    6.70
  -2   6   5   80.29    7.80
  -2   6   5   69.49    8.10
  -2  -6  -5   91.69    7.60
   2   6  -5   70.59    8.50
   2  -6   5   76.59    8.30
   2   6   5   89.19    8.90
  -2  -6   5   76.29    7.90
  -2   6  -5   50.29    6.70
   2  -6  -5   72.69    7.80
  -2   6  -5   64.39    7.90
   2   6   5   74.29    8.10
  -2  -6   5   48.80    6.70
   2   6   5   77.09    8.70
  -3   6   5  313.17   18.10
   3  -6   5  297.67   17.80
  -3   6   5  312.27   18.20
  -3  -6  -5  344.97   18.60
   3  -6   5  334.37   18.50
  -3   6   5  294.87   17.20
   3   6   5  320.57   17.80
   3  -6  -5  340.47   18.00
   3   6   5  347.87   18.70
  -3  -6   5  325.67   19.50
  -3  -6   5  293.67   17.60
  -3   6  -5  301.87   18.80
  -3   6  -5  325.17   17.90
  -4  -6  -5  191.68   13.10
  -4   6   5  207.48   13.80
  -4   6   5  190.48   12.90
   4  -6   5  177.18   13.10
  -4   6  -5  184.58   12.70
  -4  -6   5  180.88   13.00
   4   6   5  178.98   13.20
  -4   6  -5  179.78   13.60
   4   6   5  198.18   12.90
  -5   6   5  232.98   15.10
   5  -6   5  197.38   14.70
  -5   6   5  203.38   14.80
  -5  -6  -5  208.18   15.20
  -5  -6  -5  181.68   14.20
  -5   6  -5  195.08   15.60
  -5  -6   5  242.18   15.40
   5   6   5  220.48   14.10
   5   6   5  228.78   15.40
  -6  -6  -5   87.59   10.60
  -6   6   5   94.99   11.30
  -6   6   5   95.79   11.40
   6   6   5   77.29    9.20
  -6   6  -5   87.29   11.70
  -6  -6   5   78.49   10.30
  -7  -6  -5   52.89    8.80
  -7   6   5   64.39   10.20
  -7   6   5   53.19    9.40
  -7   6  -5   58.09   10.10
  -7  -6   5   48.70    8.30
  -7  -6   5   55.99    9.30
   7   6   5   40.30    7.00
   0   7  -5   10.40    3.60
   0  -7   5    8.60    3.30
   0   7   5    8.10    3.40
   0   7  -5    6.50    3.80
   0  -7  -5    5.10    3.50
   0  -7   5    7.40    4.20
   0   7   5    0.90    3.20
   0   7   5    8.70    3.70
  -1   7   5  890.71   38.50
   1  -7   5  885.61   42.00
   1   7  -5  797.92   38.10
  -1   7   5  740.73   36.20
  -1   7   5  821.32   36.00
  -1   7   5  787.42   37.20
   1  -7   5  709.13   36.60
  -1  -7  -5  772.42   36.90
   1   7   5  840.02   37.70
  -1   7  -5  721.93   37.40
   1   7   5  867.91   36.30
   1   7   5  746.23   36.60
   1  -7  -5  766.52   36.70
  -1  -7   5  818.62   37.10
  -1   7  -5  840.72   36.70
  -2   7   5   83.99    8.50
   2  -7   5   69.29    8.70
  -2   7   5   86.89    8.80
  -2   7   5   84.59    9.50
   2   7  -5   83.49    9.90
  -2  -7  -5   80.09    9.10
   2   7   5   95.19    9.60
  -2  -7   5   79.19    9.00
  -2   7  -5  104.49   10.90
  -2   7  -5   94.79    9.50
   2   7   5   68.29    8.80
   2  -7  -5   80.89    8.90
  -3   7   5  407.66   21.30
  -3  -7  -5  391.26   21.90
  -3   7   5  420.36   22.30
   3  -7   5  385.86   21.90
  -3   7  -5  360.36   22.00
   3   7   5  415.26   21.60
   3   7   5  373.46   21.60
  -3  -7   5  379.16   21.50
  -4   7   5   10.00    4.20
  -4  -7  -5    7.20    4.20
  -4   7   5   11.00    4.70
   4  -7   5    6.30    3.30
   4   7   5    4.00    4.30
  -4   7  -5    5.00    4.50
  -4  -7   5    9.70    4.50
   4   7   5    6.60    3.40
   5  -7   5   68.69    9.30
  -5   7   5   73.29    9.70
  -5   7   5   53.09    8.60
  -5  -7  -5   40.50    8.00
  -5  -7   5   75.39    9.70
   5   7   5   63.59    8.50
  -5   7  -5   63.39   10.00
  -6  -7  -5   38.20    8.00
  -6   7   5   36.30    7.60
  -6  -7   5   38.10    8.00
   6   7   5   43.30    7.30
  -6   7  -5   52.79    9.30
   0  -8   5   37.10    6.60
   0   8  -5   30.40    6.30
   0   8   5   25.20    5.50
   0   8   5   27.50    6.00
   0   8   5   35.80    6.10
   1  -8   5   79.49    9.30
  -1   8   5   80.89    8.70
  -1   8   5   77.59    9.60
  -1  -8  -5   83.49   11.50
   1   8  -5   82.49   10.40
  -1   8   5   66.49    8.80
   1   8   5   77.09    9.50
  -1  -8   5   80.19    9.50
   1   8   5   90.19   10.20
  -1   8  -5   82.69   10.30
   2  -8   5    4.10    3.90
   2   8  -5   -2.10    3.80
  -2   8   5    4.20    3.60
  -2   8   5    1.60    2.90
   2   8   5    5.00    3.40
  -2  -8   5    0.90    3.30
  -2   8  -5    5.80    3.70
   2   8   5    7.40    3.60
  -3   8   5  314.77   19.70
  -3   8   5  340.37   19.10
   3  -8   5  315.07   19.50
   3   8   5  297.77   19.50
   3   8   5  358.36   20.10
  -3  -8   5  305.57   19.20
  -3   8  -5  290.97   20.10
  -4   8   5   14.00    5.10
  -4   8   5   17.40    5.90
   4  -8   5   15.50    5.40
  -4  -8   5   16.20    5.50
  -4   8  -5   11.00    5.50
   4   8   5   20.40    5.90
  -5   8   5  218.08   16.70
  -5   8   5  219.18   16.30
   5  -8   5  206.38   16.60
   5   8   5  216.78   15.40
  -5  -8   5  214.98   16.40
  -5   8  -5  259.87   18.90
   0   9   5    3.00    4.20
   0   9   5    3.40    3.90
   0   9   5    8.50    4.00
   0   9  -5   10.80    5.20
   0  -9   5    5.20    3.60
   1  -9   5   33.00    7.10
  -1   9   5   34.00    6.60
  -1   9   5   36.60    7.40
   1   9  -5   39.50    7.80
  -1   9   5   23.10    5.60
  -1   9  -5   26.00    7.00
   1   9   5   41.80    7.90
   1   9   5   29.80    6.40
  -1  -9   5   25.50    6.30
  -2   9   5   22.70    6.80
  -2   9   5   26.70    6.10
   2  -9   5   33.30    7.20
   2   9   5   29.80    7.00
  -2   9  -5   28.10    7.20
  -2  -9   5   28.30    6.70
   2   9   5   32.80    7.40
  -3   9   5    2.40    4.00
   3  -9   5    0.50    2.90
  -3   9   5    5.60    4.70
   3   9   5    0.90    3.30
  -3   9  -5   12.00    5.80
  -3  -9   5    8.80    4.70
  -4   9   5  524.65   28.40
  -4   9   5  461.55   26.30
   4  -9   5  454.25   27.40
   4   9   5  443.66   26.40
  -4   9  -5  498.25   29.00
  -4  -9   5  447.36   27.00
   0  10  -5   13.30    6.10
   0 -10   5   20.00    6.40
   0  10   5   21.10    6.20
   1 -10   5   39.40    8.00
  -1  10   5   28.50    6.40
   1  10  -5   39.60    8.70
  -1 -10   5   37.30    8.00
  -1  10  -5   39.50    8.00
   0   0  -6 6861.51  277.27
   0   0  -6 7083.49  277.07
   0   0   6 7304.27  278.17
   0   0   6 7281.47  276.67
   0   0   6 7379.06  278.27
   1   0   6  683.63   28.20
  -1   0  -6  687.13   28.20
  -1   0   6  675.33   26.90
  -1   0  -6  682.33   27.60
  -1   0  -6  657.83   27.30
  -1   0  -6  716.53   27.50
  -1   0   6  677.53   26.50
   1   0   6  673.13   27.70
   1   0   6  674.93   27.60
  -1   0   6  669.73   26.50
  -1   0   6  691.83   27.80
  -2   0  -6  418.76   17.00
   2   0   6  366.76   16.80
  -2   0  -6  365.16   17.10
  -2   0   6  388.46   15.40
  -2   0  -6  356.76   16.70
  -2   0   6  360.06   15.80
   2   0  -6  388.16   15.20
  -2   0   6  369.26   15.80
   2   0  -6  364.56   15.20
   2   0   6  387.26   17.40
   2   0   6  361.56   16.80
   3   0   6   10.30    2.50
  -3   0   6    3.60    1.60
   3   0  -6    0.10    1.10
  -3   0   6    1.40    1.10
  -3   0  -6   -1.30    1.40
  -3   0   6   -0.50    1.20
  -3   0  -6    3.50    2.20
   3   0   6    3.00    2.00
   3   0   6    0.60    1.40
   3   0  -6    2.10    1.20
  -4   0   6  590.34   24.60
  -4   0  -6  543.95   26.50
  -4   0  -6  546.55   26.10
  -4   0   6  620.44   25.80
   4   0   6  594.04   26.70
  -4   0   6  575.54   25.70
   4   0  -6  597.04   25.10
   4   0   6  555.44   25.60
   4   0   6  565.74   26.50
  -5   0   6   32.60    4.80
  -5   0   6   29.00    3.80
  -5   0  -6   25.60    4.70
   5   0   6   36.30    5.70
   5   0   6   32.30    5.10
  -5   0  -6   27.80    5.10
   5   0  -6   29.40    4.20
   5   0   6   30.40    4.40
  -5   0   6   32.00    4.80
  -6   0  -6   25.20    5.40
  -6   0  -6   20.20    4.90
  -6   0   6   22.70    4.70
   6   0   6   19.30    4.00
   6   0   6   14.80    4.40
  -6   0   6   17.50    3.70
  -7   0  -6   13.00    4.70
  -7   0   6    8.60    3.30
   7   0   6   12.90    4.80
  -7   0  -6   13.70    4.70
   7   0   6    8.30    3.30
  -7   0   6   13.30    4.50
  -8   0   6  266.67   18.10
  -8   0   6  302.07   18.10
  -8   0  -6  277.97   18.50
   0  -1  -6  185.48    8.30
   0  -1   6  183.38    7.80
   0   1   6  182.48    8.30
   0  -1  -6  182.48    7.80
   0  -1  -6  185.68    9.00
   0  -1   6  190.28    9.00
   0   1   6  172.48    8.10
   0   1  -6  177.88    8.90
   0  -1   6  176.18    7.80
   0  -1   6  195.88    8.90
   0  -1  -6  183.58    7.80
   0   1   6  184.88    8.20
   0   1  -6  168.18    8.70
   0   1   6  187.08    9.00
   1  -1   6 2482.55   99.39
  -1  -1  -6 2752.32  100.49
  -1   1   6 2620.94   99.49
  -1  -1  -6 2675.13   99.49
  -1  -1  -6 2557.34   99.39
  -1  -1  -6 2552.44   99.89
   1  -1   6 2605.84  100.19
  -1   1   6 2456.05   98.89
   1  -1   6 2505.35   99.99
  -1   1   6 2410.46   98.89
   1  -1   6 2559.34   99.49
   1   1   6 2605.44  100.29
   1   1   6 2541.85   99.59
   1   1   6 2506.45   99.59
   1  -1  -6 2605.44   98.39
   1  -1  -6 2453.25   98.39
  -1  -1   6 2460.15   98.49
  -1   1  -6 2549.04   99.19
  -1  -1   6 2567.14   98.49
  -1   1  -6 2449.66  100.09
   1  -1  -6 2552.74   99.39
   1  -1  -6 2464.75   98.09
  -1  -1   6 2556.44  100.09
  -1   1  -6 2560.94  100.09
   1   1   6 2701.73  100.09
  -1   1  -6 2591.94   99.19
  -2   1   6  236.78   10.40
  -2  -1  -6  213.08   10.90
   2   1  -6  232.88    9.40
  -2   1   6  233.18    9.70
   2  -1   6  209.18   11.30
  -2  -1  -6  241.28   11.10
   2  -1   6  226.48   11.00
  -2  -1  -6  221.38   11.40
   2   1  -6  234.88    9.40
  -2   1   6  226.38   10.30
  -2   1  -6  217.68   11.30
  -2   1  -6  195.68   11.20
   2  -1  -6  206.88    9.70
  -2   1  -6  228.48   10.90
   2  -1  -6  215.18    9.80
  -2  -1   6  212.38   11.30
   2   1   6  207.48   11.00
   2  -1  -6  243.28   10.00
  -2  -1   6  215.38   10.00
  -2  -1   6  210.58   10.00
   2   1   6  215.38   11.30
   2   1   6  206.08   11.20
   2   1   6  200.88   10.90
   3   1  -6 1717.03   63.19
  -3  -1  -6 1573.54   64.59
  -3   1   6 1655.53   64.09
  -3   1   6 1594.94   61.79
  -3   1   6 1563.94   62.19
   3  -1   6 1635.24   64.79
  -3  -1  -6 1604.84   64.99
  -3   1   6 1633.24   63.99
   3  -1   6 1656.13   64.89
  -3  -1  -6 1732.23   64.99
   3   1  -6 1496.05   62.89
  -3  -1   6 1598.24   61.89
   3  -1  -6 1526.35   63.29
   3   1   6 1553.04   64.79
  -3   1  -6 1541.15   64.49
   3   1   6 1575.54   64.79
  -3   1  -6 1547.45   64.89
  -3  -1   6 1598.04   63.69
   3   1   6 1583.24   64.49
  -3   1  -6 1513.85   64.79
   3  -1  -6 1592.14   63.29
  -3   1  -6 1704.43   64.89
  -3  -1   6 1485.95   63.59
   4  -1   6  364.66   18.90
   4   1  -6  411.76   17.60
  -4   1   6  386.36   18.30
   4  -1   6  379.36   19.10
  -4   1   6  385.66   16.60
  -4   1   6  376.16   18.20
  -4  -1  -6  391.26   19.00
  -4  -1  -6  340.17   18.70
  -4  -1   6  383.56   17.50
  -4  -1   6  387.06   18.20
   4   1   6  369.86   18.20
   4   1   6  365.76   18.90
  -4   1  -6  373.46   18.80
  -4  -1   6  398.86   18.20
  -4   1  -6  370.26   19.00
   4  -1  -6  409.46   17.90
   4   1   6  385.56   19.10
   5  -1   6  561.14   26.40
  -5   1   6  532.75   23.60
  -5  -1  -6  569.34   26.40
  -5   1   6  495.25   25.20
  -5   1   6  504.65   25.30
  -5  -1  -6  522.55   26.10
   5  -1   6  536.75   26.20
   5   1  -6  527.55   24.40
   5  -1  -6  531.65   24.60
   5   1   6  503.75   26.00
   5   1   6  545.85   25.00
   5   1   6  583.14   26.60
  -5  -1   6  556.54   25.60
  -5   1  -6  541.65   26.30
  -5  -1   6  592.14   24.60
  -5   1  -6  551.94   26.10
  -5  -1   6  580.94   25.70
  -6   1   6  105.19    9.00
  -6   1   6   99.09    7.40
  -6  -1  -6  123.39   10.00
  -6  -1  -6  110.19    9.30
   6  -1   6  118.69    8.50
   6  -1   6   94.19   10.20
  -6  -1   6  121.39    8.30
  -6  -1   6  109.49    9.00
  -6   1  -6  119.59    9.80
   6   1   6  119.49   10.00
   6   1   6  112.69    8.20
  -6   1  -6  112.19   10.80
  -7   1   6  105.29    7.80
  -7   1   6  103.49   10.70
  -7  -1  -6   83.89   10.20
   7  -1   6   82.69    8.20
   7  -1   6   98.19   10.90
  -7  -1  -6  109.39   11.20
  -7  -1   6   89.59   10.00
   7   1   6   96.59    8.80
  -7   1  -6   93.99   10.20
  -7  -1   6   99.29    8.20
   7   1   6   93.49   10.50
  -7   1  -6   75.99    9.70
  -8  -1  -6  141.59   14.20
  -8   1   6  138.59   13.70
  -8  -1   6  145.09   11.10
  -8  -1   6  147.39   12.50
  -8   1  -6  151.28   14.40
   0  -2  -6  153.68    7.40
   0   2   6  128.69    7.70
   0   2   6  147.79    7.70
   0  -2   6  160.78    8.50
   0   2  -6  150.58    6.90
   0   2   6  142.89    7.60
   0  -2  -6  160.38    7.60
   0  -2   6  146.69    7.30
   0  -2   6  155.78    8.00
   0  -2   6  153.68    7.40
   0   2  -6  143.79    8.20
   0  -2  -6  159.98    8.20
   0   2  -6  144.49    7.00
   1   2  -6  105.59    5.30
  -1  -2  -6  105.19    6.40
   1  -2   6  120.99    7.10
   1  -2   6  112.69    6.30
  -1  -2  -6  109.89    5.30
  -1   2   6  102.19    6.10
  -1   2   6  117.59    5.60
  -1  -2  -6  116.89    6.40
   1  -2   6  113.89    6.30
  -1   2   6   98.79    6.10
   1   2  -6  115.39    5.40
  -1  -2  -6  109.19    6.70
  -1   2   6  107.69    6.20
   1   2  -6  125.69    7.30
   1  -2   6  110.09    7.00
   1   2   6  112.19    6.50
  -1  -2   6  106.49    5.80
  -1   2  -6  111.29    6.80
  -1   2  -6  124.39    6.30
   1   2   6  111.99    6.90
   1  -2  -6  119.69    5.90
  -1  -2   6  105.49    7.00
  -1   2  -6  119.19    6.10
   1   2   6  104.59    6.50
  -1  -2   6  110.99    5.80
   1  -2  -6  112.29    6.30
  -1   2  -6  110.99    7.10
   1  -2  -6  118.29    6.00
  -2  -2  -6  718.83   28.50
  -2  -2  -6  682.33   28.10
   2  -2   6  629.44   28.00
  -2   2   6  645.24   27.60
  -2  -2  -6  600.04   28.10
   2  -2   6  643.84   28.60
   2  -2   6  680.73   28.20
   2   2  -6  674.73   26.70
  -2   2   6  644.04   26.90
   2  -2   6  663.33   28.60
   2   2  -6  656.63   26.60
  -2  -2  -6  663.43   28.10
  -2   2   6  673.53   27.70
  -2   2  -6  690.13   28.10
  -2   2  -6  688.83   28.90
   2   2   6  623.84   28.20
   2  -2  -6  669.73   27.00
   2   2   6  664.23   28.30
  -2  -2   6  601.24   27.00
   2  -2  -6  647.44   27.10
   2  -2  -6  645.24   27.20
   2  -2  -6  672.93   25.80
  -2  -2   6  628.14   27.20
   2   2   6  684.93   28.40
  -2  -2   6  681.43   27.10
  -2   2  -6  613.44   27.60
  -2   2  -6  590.24   28.30
  -2  -2   6  673.13   28.90
   3  -2   6  292.67   14.60
  -3   2   6  299.27   14.20
  -3  -2  -6  274.87   14.40
  -3  -2  -6  267.07   14.50
  -3  -2  -6  298.87   14.40
   3   2  -6  291.57   13.20
  -3   2   6  278.67   14.10
  -3   2   6  293.27   12.40
   3  -2   6  278.37   14.50
  -3  -2  -6  298.27   14.70
  -3  -2   6  288.47   13.80
   3  -2  -6  294.47   13.60
   3   2   6  275.27   14.60
  -3  -2   6  288.37   12.50
  -3   2  -6  272.37   14.80
  -3  -2   6  264.67   13.50
  -3   2  -6  260.17   14.10
   3   2   6  285.17   14.70
  -3   2  -6  252.47   14.50
   3  -2  -6  295.77   12.50
   3  -2  -6  293.87   12.10
   3   2   6  276.47   14.30
  -3   2  -6  300.87   14.60
   4  -2   6  811.82   36.20
   4  -2   6  839.22   36.40
  -4   2   6  829.62   33.40
  -4   2   6  825.52   35.70
  -4  -2  -6  820.72   36.50
  -4   2   6  793.82   35.50
  -4  -2  -6  817.82   36.20
   4   2  -6  886.11   34.80
  -4  -2   6  819.82   32.80
  -4   2  -6  820.22   36.40
  -4  -2   6  815.42   35.50
  -4  -2   6  807.32   35.10
   4  -2  -6  836.32   35.00
  -4   2  -6  781.52   36.50
   4   2   6  851.21   36.50
   4  -2  -6  809.62   33.30
   4   2   6  778.52   35.30
   4  -2  -6  809.02   32.60
   4   2   6  837.12   36.50
  -4   2  -6  824.72   36.00
  -5  -2  -6  430.36   21.40
  -5   2   6  425.46   20.80
   5  -2   6  442.06   21.60
  -5   2   6  419.36   18.40
   5   2  -6  443.16   19.80
  -5  -2  -6  386.26   21.10
  -5   2   6  394.36   20.60
   5  -2   6  417.66   21.30
   5   2   6  414.96   20.10
  -5   2  -6  399.76   21.50
   5   2   6  425.26   21.50
   5  -2  -6  400.76   16.10
  -5  -2   6  405.26   16.60
  -5   2  -6  405.26   21.00
  -5  -2   6  380.06   20.30
  -5   2  -6  425.86   21.40
   5   2   6  394.66   21.10
  -5  -2   6  380.76   19.50
  -5  -2   6  414.16   20.40
  -6   2   6  250.07   15.20
  -6   2   6  247.48   12.80
   6  -2   6  241.88   15.50
  -6  -2  -6  240.48   15.40
  -6  -2  -6  232.58   15.30
   6   2   6  238.38   15.50
  -6   2  -6  233.38   15.30
  -6  -2   6  245.98   15.10
  -6   2  -6  234.58   15.40
   6   2   6  282.97   14.50
  -6   2  -6  231.78   15.90
  -6  -2   6  265.07   14.30
   7  -2   6   55.19    8.40
  -7   2   6   70.29    7.00
  -7  -2  -6   84.69    9.80
  -7   2   6   57.19    8.30
   7  -2   6   71.39    7.50
  -7  -2  -6   58.89    8.40
  -7  -2   6   63.79    8.60
  -7   2  -6   88.39   10.10
   7   2   6   84.69    8.20
  -7  -2   6   72.09    8.00
   7   2   6   62.19    8.70
  -7   2  -6   75.59    9.90
  -8  -2  -6   10.20    5.30
  -8   2   6   12.60    5.10
  -8  -2   6    6.80    4.50
  -8  -2   6   10.00    4.00
  -8   2  -6   18.30    6.30
  -8   2  -6   13.70    5.50
   0  -3   6  196.68   10.70
   0  -3  -6  201.48   10.00
   0   3  -6  171.98    8.90
   0  -3  -6  185.48    9.40
   0  -3   6  196.58   10.20
   0   3  -6  164.98   10.20
   0   3   6  181.48    9.70
   0  -3  -6  177.28    8.20
   0   3   6  171.08    8.20
   0  -3   6  169.48    9.30
   0  -3   6  174.48    9.30
   0   3   6  177.58    9.70
   0   3   6  186.48    9.70
   0   3  -6  194.68    9.20
   1   3  -6  357.46   15.60
  -1  -3  -6  343.87   16.40
   1  -3   6  354.26   17.30
   1  -3   6  372.86   16.50
  -1   3   6  335.17   16.10
  -1  -3  -6  351.36   16.80
  -1   3   6  355.06   15.30
   1  -3   6  327.57   16.20
   1  -3   6  369.26   17.10
  -1   3   6  349.37   16.50
  -1  -3  -6  342.67   16.30
  -1   3   6  344.87   16.30
  -1  -3  -6  335.57   15.10
   1   3  -6  352.86   17.40
   1   3  -6  346.17   15.50
   1  -3  -6  368.66   16.30
  -1  -3   6  353.76   16.00
   1   3   6  373.86   17.00
   1   3   6  355.86   16.80
  -1   3  -6  373.86   16.30
  -1  -3   6  348.57   17.30
   1   3   6  348.17   16.60
   1  -3  -6  381.46   16.10
  -1  -3   6  360.46   16.10
  -1   3  -6  340.87   17.20
   2   3  -6  294.67   13.90
   2  -3   6  309.07   15.10
  -2   3   6  300.27   14.10
  -2  -3  -6  302.17   15.10
  -2  -3  -6  289.97   15.10
   2   3  -6  275.37   13.70
  -2  -3  -6  316.47   15.30
  -2   3   6  303.57   14.90
  -2   3   6  274.07   14.10
  -2   3   6  300.57   14.80
  -2  -3  -6  319.27   14.20
  -2  -3  -6  311.37   15.10
   2  -3   6  281.67   14.90
   2  -3  -6  320.97   14.30
  -2   3  -6  311.47   15.50
  -2  -3   6  304.37   14.40
   2   3   6  324.67   15.50
   2   3   6  301.27   15.10
  -2   3  -6  305.27   14.80
   2   3   6  305.97   15.30
  -2  -3   6  318.57   14.30
  -2   3  -6  291.37   15.70
   2  -3  -6  314.17   14.50
  -2   3  -6  343.67   15.20
   2  -3  -6  316.27   13.20
  -2  -3   6  284.17   14.30
  -3  -3  -6  405.26   20.50
  -3  -3  -6  407.76   20.50
  -3   3   6  421.56   18.80
   3   3  -6  414.16   19.20
   3  -3   6  455.45   20.90
   3  -3   6  457.75   20.80
  -3   3   6  398.26   20.00
  -3   3   6  412.36   20.20
  -3  -3   6  395.76   19.80
  -3   3  -6  427.16   20.80
   3   3   6  448.66   20.60
   3  -3  -6  424.86   18.20
   3  -3  -6  431.36   18.80
  -3   3  -6  469.05   20.70
  -3   3  -6  456.85   21.60
  -3  -3   6  463.75   19.10
   3   3   6  457.95   21.20
  -3  -3   6  433.86   19.80
   3   3   6  416.86   20.70
  -4  -3  -6 1107.59   47.20
   4  -3   6 1149.48   47.50
   4  -3   6 1148.29   47.50
  -4  -3  -6 1037.10   47.00
  -4   3   6 1018.20   46.40
  -4   3   6 1093.09   46.80
   4   3  -6 1154.18   45.70
  -4  -3   6 1088.09   44.20
  -4  -3   6 1113.09   46.30
   4  -3  -6 1065.89   44.00
  -4   3  -6 1079.29   47.30
  -4   3  -6 1083.19   47.80
   4  -3  -6 1077.49   44.10
   4   3   6 1130.09   47.50
  -4   3  -6 1058.09   46.80
  -4  -3   6 1079.69   46.40
   4   3   6 1111.49   46.50
   4   3   6 1116.99   47.40
  -5   3   6  409.06   21.10
  -5   3   6  409.66   18.50
  -5  -3  -6  385.86   21.20
   5   3  -6  403.36   19.70
   5  -3   6  432.26   21.80
  -5  -3  -6  405.16   21.50
   5  -3   6  396.76   21.30
  -5   3   6  401.66   21.00
   5   3   6  423.86   20.50
  -5   3  -6  391.06   21.00
  -5  -3   6  399.46   20.50
  -5   3  -6  408.46   22.10
   5   3   6  433.96   21.90
  -5  -3   6  423.86   21.00
   5  -3  -6  427.36   18.50
   5  -3  -6  407.06   17.50
   5  -3  -6  407.46   20.30
  -5   3  -6  379.16   21.00
  -5  -3   6  396.26   17.70
  -6   3   6  221.98   11.90
  -6  -3  -6  231.48   15.00
  -6   3   6  226.28   14.50
   6  -3   6  251.57   15.30
  -6  -3  -6  209.48   14.60
  -6   3  -6  193.18   14.90
   6   3   6  237.98   15.20
   6   3   6  228.18   13.40
  -6  -3   6  208.38   14.00
  -6  -3   6  203.48   13.20
  -6   3  -6  230.28   14.80
  -6   3  -6  211.28   14.20
   7  -3   6   82.39    9.90
  -7   3   6   64.49    8.90
  -7  -3  -6   52.89    8.50
   7   3   6   81.79    8.40
  -7  -3   6   79.89    9.70
  -7  -3   6   58.89    7.90
  -7   3  -6   63.39    9.20
  -7   3  -6   87.39   11.30
   7   3   6  100.69   11.20
  -8   3   6   52.89    8.70
  -8  -3  -6   66.29    9.30
  -8   3  -6   55.89    8.90
  -8  -3   6   55.59    8.10
  -8   3  -6   49.50    9.30
  -8  -3   6   62.89    9.50
   0  -4  -6  387.06   18.50
   0  -4   6  362.16   18.30
   0   4  -6  405.96   19.50
   0   4   6  384.76   17.20
   0  -4  -6  414.06   19.60
   0   4   6  408.56   18.80
   0   4   6  353.76   18.40
   0  -4  -6  402.86   17.20
   0  -4   6  410.76   18.60
   0   4   6  406.76   19.00
   0  -4  -6  407.36   19.90
  -1  -4  -6  329.97   13.90
  -1   4   6  311.27   14.80
  -1   4   6  309.17   13.90
   1   4  -6  293.27   14.10
  -1   4   6  317.57   15.30
   1  -4   6  308.57   15.00
  -1  -4  -6  293.27   15.00
   1  -4   6  320.97   15.20
  -1   4   6  309.57   15.00
   1   4  -6  297.07   15.80
   1   4   6  314.67   15.40
   1   4   6  272.17   14.90
  -1  -4   6  282.27   14.50
  -1  -4   6  269.27   14.30
  -1  -4   6  310.17   14.80
   1  -4  -6  295.07   14.70
  -1   4  -6  254.27   14.10
   1  -4  -6  278.47   14.60
   1   4   6  299.57   15.30
  -1   4  -6  275.17   15.50
  -2  -4  -6  682.63   30.40
   2   4  -6  708.73   29.30
   2  -4   6  687.63   30.40
  -2   4   6  661.43   29.40
  -2   4   6  676.73   30.20
  -2  -4  -6  678.23   29.10
  -2   4   6  634.94   29.20
  -2   4   6  691.33   30.40
   2  -4   6  622.24   30.00
   2  -4  -6  697.63   29.50
   2   4   6  672.83   30.40
   2   4   6  710.53   30.70
  -2  -4   6  718.73   29.90
  -2   4  -6  644.84   31.00
  -2  -4   6  672.03   29.80
   2   4   6  687.13   30.80
   2  -4  -6  684.53   29.90
   2  -4  -6  724.03   28.60
  -2  -4   6  692.13   29.50
  -2   4  -6  686.13   29.90
  -3   4   6   18.50    3.60
   3  -4   6   24.40    4.50
  -3   4   6   26.70    3.80
  -3   4   6   20.70    4.00
  -3  -4  -6   21.50    4.20
   3  -4   6   19.00    4.10
  -3   4   6   25.30    4.40
  -3  -4  -6   28.50    4.80
  -3  -4  -6   24.10    3.80
   3   4  -6   26.00    3.60
   3  -4  -6   27.60    4.10
  -3   4  -6   25.40    4.30
   3   4   6   26.40    4.70
  -3  -4   6   31.10    4.30
   3   4   6   22.00    4.10
  -3   4  -6   22.40    4.60
   3  -4  -6   31.30    3.40
   3   4   6   21.10    4.40
   3  -4  -6   26.30    3.70
  -3  -4   6   30.40    4.00
  -3   4  -6   26.50    4.80
  -3  -4   6   31.60    4.50
  -4   4   6   58.19    6.80
  -4  -4  -6   51.79    6.70
   4  -4   6   60.59    7.10
  -4   4   6   58.79    6.80
   4   4  -6   50.49    5.60
   4  -4   6   39.50    6.00
  -4  -4  -6   50.39    6.60
  -4   4   6   43.80    6.20
  -4  -4   6   48.50    5.90
   4  -4  -6   48.20    4.60
   4   4   6   58.49    7.30
  -4  -4   6   57.29    5.40
   4  -4  -6   57.19    5.20
   4  -4  -6   44.00    5.80
  -4   4  -6   46.60    6.10
  -4   4  -6   43.70    6.40
  -4   4  -6   39.80    6.20
   4   4   6   54.09    6.40
   4   4   6   52.29    6.80
  -4  -4   6   57.29    6.60
  -5  -4  -6   69.89    8.70
  -5  -4  -6   83.59    9.20
  -5   4   6   80.19    8.90
  -5   4   6   75.59    8.50
   5   4   6   89.09    9.60
  -5   4  -6   83.99    9.30
  -5  -4   6   77.79    8.50
  -5   4  -6   82.59    9.00
   5   4   6   87.19    8.40
  -5  -4   6   90.69    6.90
  -5   4  -6   75.89    9.40
  -6  -4  -6  331.77   19.10
  -6  -4  -6  279.27   18.00
   6  -4   6  299.27   18.40
  -6   4   6  298.47   18.60
  -6   4   6  302.97   18.40
   6   4   6  299.47   16.90
  -6   4  -6  311.77   19.30
   6   4   6  312.07   18.90
  -6  -4   6  286.87   17.90
  -6   4  -6  311.17   18.50
  -7   4   6   13.20    5.00
  -7  -4  -6   15.10    5.50
   7  -4   6   25.10    6.30
  -7   4   6   18.40    5.10
   7   4   6   10.80    4.10
  -7   4  -6   17.80    5.00
  -7   4  -6   23.00    6.80
  -7  -4   6   15.50    5.00
  -7  -4   6   14.60    4.70
   7   4   6   15.30    6.20
  -8   4   6  116.79   12.90
  -8  -4  -6   92.39   11.80
  -8   4   6  100.59   13.20
  -8   4  -6   90.19   11.70
  -8  -4   6  106.19   12.50
  -8  -4   6  102.59   11.30
  -8   4  -6  103.99   13.30
   0   5   6  300.27   15.20
   0   5   6  297.37   15.50
   0  -5  -6  266.57   14.80
   0   5  -6  287.97   14.50
   0  -5   6  292.47   15.10
   0   5   6  278.47   13.70
   0   5   6  295.37   15.40
   0   5  -6  291.67   15.90
   0  -5   6  274.67   14.80
   0  -5  -6  268.17   13.60
  -1   5   6  483.55   22.70
   1   5  -6  459.85   23.50
  -1   5   6  509.25   23.10
  -1  -5  -6  442.16   20.90
  -1   5   6  463.35   22.20
   1  -5   6  493.65   22.60
  -1  -5  -6  458.75   22.40
  -1   5   6  471.75   21.30
   1  -5   6  472.65   22.70
   1  -5  -6  481.35   22.40
   1   5   6  477.55   22.90
  -1   5  -6  495.65   22.10
   1   5   6  485.85   23.00
   1  -5  -6  484.55   21.30
  -1  -5   6  484.25   22.30
  -1   5  -6  455.65   23.30
   1   5   6  444.86   22.50
  -1  -5   6  424.46   21.90
  -2   5   6  115.69    8.10
  -2  -5  -6  121.89    7.80
  -2   5   6   98.59    8.50
   2   5  -6  118.69    9.40
   2  -5   6  146.39    9.50
  -2   5   6  133.89    9.30
   2  -5   6  105.59    8.60
  -2  -5  -6  113.79    8.80
  -2   5   6  116.99    8.20
  -2   5  -6  130.79    8.80
   2  -5  -6  118.49    8.60
   2   5   6  122.69    8.90
  -2  -5   6  121.59    8.50
   2   5   6  134.09    9.00
  -2   5  -6  122.49    9.60
   2  -5  -6  140.09    7.80
  -2  -5   6  109.49    8.40
   2   5   6  137.59    9.40
  -3   5   6  776.52   35.40
  -3   5   6  845.52   36.70
  -3   5   6  813.92   36.30
   3  -5   6  778.32   36.30
  -3  -5  -6  758.12   36.10
   3  -5   6  838.52   36.70
  -3   5   6  824.22   34.90
   3  -5  -6  801.02   35.70
   3   5   6  859.21   37.00
  -3   5  -6  776.72   35.80
  -3  -5   6  810.62   36.00
  -3  -5   6  837.12   35.80
  -3   5  -6  771.72   37.20
   3   5   6  776.82   36.40
   3  -5  -6  786.32   33.80
   3   5   6  786.72   36.00
   4  -5   6   13.40    4.20
  -4   5   6   12.40    3.80
  -4   5   6   16.30    4.70
  -4  -5  -6    3.10    2.80
  -4   5   6    8.50    3.60
   4  -5   6   14.80    4.30
  -4  -5  -6   15.20    4.50
  -4  -5   6   11.10    3.70
  -4   5  -6    9.30    4.60
   4   5   6   14.40    4.30
   4   5   6   14.60    3.90
   4  -5  -6    7.50    3.20
  -4   5  -6   12.00    3.70
  -4   5  -6    5.20    3.30
   4  -5  -6   15.50    3.50
  -4  -5   6    8.00    5.40
  -5  -5  -6  129.99   10.70
   5  -5   6  134.09   11.00
  -5   5   6  112.09    9.70
  -5  -5  -6   89.89   10.30
  -5   5   6  115.19   10.00
  -5   5  -6  118.89   12.30
   5   5   6  121.99    9.80
  -5  -5   6  113.49    9.90
  -5   5  -6  137.49   13.60
  -5   5  -6  108.89   11.20
   5   5   6  140.69   11.20
   6  -5   6   35.10    7.10
  -6   5   6   26.70    6.30
  -6  -5  -6   26.40    6.20
  -6   5   6   41.70    7.10
  -6   5  -6   38.70    7.50
  -6   5  -6   37.70    7.10
   6   5   6   36.60    7.20
  -6  -5   6   26.10    6.10
   6   5   6   32.40    6.00
  -7   5   6   30.00    7.50
   7  -5   6   26.20    6.80
  -7  -5  -6   29.20    7.30
  -7   5   6   32.80    7.20
  -7  -5   6   23.50    6.20
  -7   5  -6   22.90    7.20
  -7  -5   6   17.90    5.40
  -7   5  -6   26.50    6.50
   7   5   6   31.50    6.10
   0   6   6  384.36   18.40
   0   6   6  394.46   20.30
   0   6   6  383.56   20.00
   0  -6   6  346.47   19.30
   0   6  -6  375.06   20.60
   0  -6   6  373.46   19.50
   0   6   6  372.66   19.50
   0  -6  -6  406.46   19.90
   0   6  -6  373.76   19.00
   1   6  -6  561.94   24.40
  -1   6   6  550.24   25.60
  -1  -6  -6  496.35   24.80
  -1   6   6  518.55   25.20
   1  -6   6  479.55   24.70
   1   6  -6  495.25   25.90
   1  -6   6  506.45   25.00
  -1   6   6  510.55   23.60
  -1   6   6  479.45   24.40
  -1   6  -6  513.35   24.30
  -1  -6   6  536.45   24.90
   1   6   6  470.35   24.80
   1  -6  -6  484.85   24.50
   1   6   6  503.65   24.90
  -1  -6   6  496.25   24.60
   1   6   6  565.44   25.90
  -1   6  -6  490.05   25.70
  -2   6   6   79.39    6.70
  -2   6   6   72.69    7.50
   2  -6   6   71.49    8.00
  -2  -6  -6   70.69    8.00
   2  -6   6   85.59    8.80
   2   6  -6   84.79    6.80
  -2   6   6   66.59    8.00
   2   6  -6   63.99    8.50
  -2   6   6   74.39    8.20
  -2  -6   6   80.09    8.00
   2   6   6   75.99    8.20
   2  -6  -6   78.09    8.00
   2   6   6   80.69    8.90
  -2   6  -6   73.89    7.70
   2   6   6   77.89    8.50
  -2   6  -6   71.99    8.50
  -2  -6   6   71.09    7.80
   3  -6   6  206.78   13.60
  -3   6   6  206.18   12.30
  -3  -6  -6  162.28   12.60
  -3   6   6  198.88   13.40
  -3   6   6  191.78   12.60
   3  -6   6  218.18   13.90
  -3   6  -6  211.38   14.50
   3   6   6  206.18   13.80
  -3   6  -6  209.48   13.00
  -3  -6   6  188.68   12.90
   3   6   6  205.08   13.30
   3  -6  -6  208.98   13.00
  -4  -6  -6  229.98   15.70
   4  -6   6  265.37   16.70
  -4   6   6  261.77   15.90
  -4   6   6  268.27   16.60
  -4  -6   6  275.47   16.50
  -4   6  -6  253.07   17.00
   4   6   6  279.57   16.80
   4   6   6  278.57   16.30
  -5   6   6  383.46   21.70
  -5   6   6  363.86   21.90
  -5  -6  -6  372.56   21.90
   5  -6   6  357.66   21.80
  -5  -6   6  399.76   22.10
  -5   6  -6  397.96   23.50
   5   6   6  390.86   21.40
   5   6   6  417.46   22.80
  -6  -6  -6   40.00    7.60
  -6   6   6   64.19    9.40
  -6   6   6   52.19    8.50
  -6   6  -6   39.40    8.30
   6   6   6   44.70    7.30
  -6  -6   6   46.70    8.00
  -7   6   6   51.99    9.40
  -7   6   6   49.60    9.00
  -7  -6  -6   51.69    9.10
  -7  -6   6   37.80    8.10
  -7  -6   6   53.29    8.50
   7   6   6   45.60    7.50
  -7   6  -6   64.39   10.70
   0   7   6   26.90    5.50
   0   7   6   44.70    6.80
   0   7  -6   26.90    6.00
   0   7   6   25.70    5.40
   0  -7  -6   35.50    6.10
   0   7   6   36.60    5.20
   0  -7   6   33.60    5.90
   1   7  -6   46.30    7.40
  -1   7   6   25.90    5.60
  -1   7   6   34.50    5.40
  -1   7   6   31.20    5.70
  -1  -7  -6   30.90    5.50
   1  -7   6   24.20    5.30
   1   7   6   36.70    6.30
   1  -7  -6   38.50    6.20
   1   7   6   42.40    6.50
  -1   7  -6   42.10    6.80
  -1  -7   6   27.30    5.50
   2   7  -6  327.87   19.70
   2  -7   6  322.87   18.40
  -2   7   6  337.27   17.50
  -2   7   6  320.47   18.80
  -2  -7  -6  329.27   18.50
  -2   7   6  302.47   17.60
   2   7   6  309.27   18.30
  -2  -7   6  316.97   18.20
  -2   7  -6  293.27   19.00
   2   7   6  280.17   18.10
  -3   7   6   41.60    6.60
  -3  -7  -6   30.20    6.10
  -3   7   6   24.40    5.80
   3  -7   6   17.80    5.10
  -3  -7   6   32.50    6.20
  -3   7  -6   32.60    6.60
   3   7   6   32.80    6.40
   3   7   6   33.70    6.20
   4  -7   6  258.87   17.60
  -4   7   6  262.97   16.90
  -4   7   6  271.37   17.80
   4   7   6  273.67   17.30
  -4  -7   6  292.87   17.90
   4   7   6  291.17   18.40
  -4   7  -6  320.97   19.90
  -5   7   6   48.10    8.30
   5  -7   6   42.80    8.00
  -5   7   6   50.59    8.30
  -5  -7  -6   54.79    8.70
   5   7   6   47.90    7.70
  -5  -7   6   54.69    8.20
   5   7   6   48.80    8.50
  -5   7  -6   56.49    9.50
   6  -7   6   49.00    9.40
  -6   7   6   71.39   10.50
  -6   7   6   80.89   11.00
  -6  -7  -6   60.69    9.50
  -6   7  -6   64.49   10.20
  -6  -7   6   68.59   10.00
   6   7   6   53.79    8.40
   0   8   6   17.50    5.00
   0   8   6   10.10    3.80
   0   8   6    3.20    3.30
   0   8  -6    9.80    4.20
   0  -8   6    7.80    4.00
   1   8  -6   66.09    9.60
  -1   8   6   75.89    9.50
   1  -8   6   80.79    9.90
  -1   8   6   88.59    9.00
  -1   8   6   75.69    9.40
   1   8   6   90.09   10.30
   1   8   6   66.69    8.90
  -1  -8   6   86.49    9.90
  -1   8  -6   69.19    9.90
  -2   8   6   95.89   10.90
  -2   8   6  103.09   10.50
   2   8  -6   79.09   10.80
  -2   8   6   82.29    9.10
   2  -8   6  107.89   11.50
  -2   8  -6   93.89   11.40
   2   8   6  107.49   11.40
  -2  -8   6   91.49   10.30
   2   8   6  101.19   10.90
   3  -8   6  116.59   12.60
  -3   8   6  113.89   12.20
  -3   8   6  133.49   11.10
   3   8   6  126.89   13.00
  -3  -8   6  133.19   13.00
  -3   8  -6  104.29   12.70
   3   8   6  141.79   13.00
  -4   8   6   14.30    5.30
   4  -8   6   15.50    5.80
  -4   8   6    9.10    5.30
  -4   8  -6   13.60    5.90
  -4  -8   6    5.20    4.30
   4   8   6   23.40    6.00
   4   8   6    8.30    5.30
  -5  -8  -6  131.99   14.10
  -5   8   6  144.29   14.10
  -5   8   6  137.69   14.50
   5  -8   6  146.79   14.90
  -5  -8   6  152.38   14.80
  -5   8  -6  136.19   15.40
   5   8   6  131.79   13.20
   0   9   6  134.09   13.80
   0   9  -6  113.89   13.20
   0   9   6  139.69   13.50
   0   9   6  123.49   10.60
   0  -9   6  137.39   13.40
   1   9  -6  138.69   14.50
  -1   9   6  147.19   11.90
  -1   9   6  133.09   13.60
  -1   9   6  138.79   11.30
   1  -9   6  145.09   14.20
   1   9   6  132.09   13.30
  -1   9  -6  159.18   13.20
   1   9   6  151.78   14.60
  -1  -9   6  124.29   13.20
   2  -9   6   90.69   10.80
  -2   9   6   69.59   10.10
  -2   9   6   85.99    9.90
  -2   9  -6   79.49   11.40
  -2  -9   6   60.19    9.40
   2   9   6   88.29   10.90
   2   9   6   65.89    9.70
  -3   9   6   89.79   11.60
  -3   9   6  132.49   12.60
   3  -9   6   99.39   12.30
  -3  -9   6  118.99   12.70
  -3   9  -6   90.39   12.00
   3   9   6   97.59   11.50
   0 -10   6  212.48   16.90
   0  10  -6  252.97   18.80
   0   0   7   -0.40    0.90
   0   0  -7    1.30    1.00
   0   0   7    0.00    0.50
   0   0   7    0.10    0.80
   0   0   7    0.50    0.50
   0   0  -7    1.50    1.00
  -1   0  -7 4353.06  164.18
  -1   0   7 4326.57  163.58
  -1   0   7 4113.99  163.48
   1   0   7 4355.46  164.58
  -1   0   7 3985.40  163.78
   1   0   7 4407.86  165.38
  -1   0  -7 4349.67  164.58
  -1   0   7 4404.46  164.78
  -1   0   7 4205.48  164.68
  -1   0  -7 4005.00  165.08
  -1   0  -7 4364.56  164.18
   1   0   7 4120.49  164.48
  -2   0   7  220.78    9.60
  -2   0  -7  199.08   10.20
   2   0   7  219.08   10.80
  -2   0   7  211.38    9.40
   2   0   7  238.88   11.50
   2   0   7  210.18   10.60
  -2   0  -7  193.78   11.00
  -2   0   7  212.88    9.60
  -2   0  -7  214.58   10.60
  -2   0  -7  210.98   10.40
   3   0   7   43.40    4.90
   3   0   7   38.30    4.60
   3   0  -7   39.80    3.00
  -3   0  -7   40.10    4.90
  -3   0   7   36.10    3.70
  -3   0  -7   36.30    4.30
   3   0   7   37.60    4.60
  -3   0   7   41.90    2.20
   3   0  -7   46.50    3.20
  -3   0   7   44.70    3.70
  -3   0  -7   50.09    5.10
  -3   0   7   37.70    2.80
  -4   0   7  129.69    8.40
   4   0   7  146.49    9.60
  -4   0  -7  138.99    9.50
  -4   0   7  134.39    7.40
  -4   0   7  150.28    8.70
   4   0   7  131.59    9.20
   4   0  -7  150.18    7.90
   4   0   7  145.79    9.00
  -4   0  -7  143.09    9.20
  -5   0   7 1009.60   41.80
   5   0  -7 1073.89   42.60
  -5   0  -7  984.20   44.50
  -5   0  -7  963.50   44.00
   5   0   7 1023.30   44.60
   5   0   7 1034.70   44.70
  -5   0   7 1022.90   43.50
   5   0   7  950.60   43.00
  -5   0   7 1042.20   43.60
  -6   0   7  147.49    8.90
  -6   0   7  139.59   10.50
  -6   0  -7  121.99   10.50
   6   0   7  133.69    9.50
   6   0   7  150.08   11.20
  -6   0  -7  137.79   10.70
  -7   0   7    9.60    4.10
  -7   0   7   11.90    3.50
   7   0   7    5.10    3.30
   7   0   7   14.80    4.90
  -7   0  -7    7.80    4.40
   8   0   7   13.40    4.90
  -8   0  -7   15.40    5.70
  -8   0   7   18.70    5.60
   0  -1  -7 1632.74   64.39
   0  -1  -7 1635.54   62.69
   0   1   7 1584.94   63.19
   0   1   7 1607.04   63.19
   0  -1   7 1609.74   63.99
   0  -1  -7 1619.24   62.69
   0   1  -7 1633.44   64.09
   0  -1   7 1536.35   62.79
   0   1   7 1675.73   63.49
   0  -1   7 1613.04   62.79
   0   1   7 1597.84   62.29
   0   1  -7 1551.14   64.09
   0  -1  -7 1675.23   63.49
   0   1   7 1589.64   64.29
   0  -1   7 1691.83   64.29
  -1   1   7  608.24   24.00
   1  -1   7  617.84   25.30
  -1  -1  -7  616.14   24.50
  -1   1   7  592.14   24.70
  -1  -1  -7  589.64   24.50
  -1  -1  -7  594.44   25.00
  -1   1   7  598.44   24.00
   1  -1   7  589.14   24.50
   1  -1   7  546.85   24.40
  -1  -1  -7  587.84   23.80
   1  -1   7  621.04   25.50
   1   1   7  578.04   24.70
  -1   1  -7  585.94   25.30
   1   1   7  583.34   25.00
  -1   1  -7  571.14   24.00
  -1  -1   7  607.24   24.50
   1   1   7  582.24   25.50
  -1  -1   7  572.24   23.40
  -1  -1   7  589.84   23.40
   1  -1  -7  588.44   23.20
   1   1   7  608.34   24.80
   1  -1  -7  596.04   24.70
  -1  -1   7  609.34   25.30
  -1   1  -7  639.74   24.30
  -1   1  -7  589.24   25.20
  -2   1   7  543.65   22.60
  -2  -1  -7  507.85   23.70
   2  -1   7  551.84   24.10
   2  -1   7  520.65   23.40
  -2  -1  -7  538.35   23.40
  -2   1   7  527.85   22.60
  -2   1   7  523.85   22.20
  -2   1  -7  590.44   23.50
   2  -1  -7  548.05   21.90
  -2  -1   7  578.54   24.10
   2  -1  -7  563.44   21.90
  -2  -1   7  553.04   22.30
  -2  -1   7  503.75   22.20
  -2   1  -7  564.34   24.00
   2   1   7  560.54   23.70
   2   1   7  576.24   24.10
  -2   1  -7  523.05   24.00
   2   1   7  503.05   23.80
   2   1   7  535.15   23.60
  -2   1  -7  532.95   23.10
   3  -1   7  479.45   22.20
  -3  -1  -7  517.15   22.40
  -3  -1  -7  475.95   22.50
  -3   1   7  490.25   21.40
   3  -1   7  481.05   22.30
   3   1  -7  469.85   20.20
  -3   1   7  484.95   19.60
  -3  -1  -7  464.75   22.00
   3   1  -7  503.35   20.40
  -3   1   7  469.95   19.40
  -3   1   7  511.55   21.50
  -3  -1   7  500.15   21.20
  -3   1  -7  527.65   22.50
   3   1   7  448.16   22.10
  -3   1  -7  483.55   22.50
   3   1   7  480.15   22.40
   3  -1  -7  472.75   20.60
  -3   1  -7  460.45   22.60
   3   1   7  507.25   22.50
   3  -1  -7  493.35   20.70
  -3   1  -7  487.45   22.00
  -3  -1   7  503.85   19.80
  -3  -1   7  505.85   21.30
   4  -1   7   55.09    6.30
  -4   1   7   66.19    3.90
  -4   1   7   65.79    6.10
   4   1  -7   54.79    4.40
  -4  -1  -7   61.39    6.30
   4  -1   7   55.09    6.10
  -4   1   7   43.00    5.00
  -4  -1  -7   52.89    6.30
   4   1   7   48.60    5.50
   4   1   7   51.59    6.10
  -4  -1   7   49.20    5.20
  -4  -1   7   56.79    4.40
   4   1   7   60.59    6.60
  -4   1  -7   58.79    6.20
  -4   1  -7   66.09    7.00
  -4   1  -7   52.49    6.30
   4  -1  -7   56.79    4.60
  -4  -1   7   60.19    5.70
  -5   1   7  276.17   14.80
   5  -1   7  291.97   15.90
   5  -1   7  276.97   15.50
   5   1  -7  266.27   13.60
  -5   1   7  288.47   15.00
  -5  -1  -7  254.97   15.30
  -5  -1  -7  237.08   14.90
  -5   1   7  262.77   12.70
   5   1   7  216.18   14.80
   5  -1  -7  265.57   13.80
  -5   1  -7  265.77   15.50
   5   1   7  260.97   14.40
  -5  -1   7  296.97   15.00
  -5   1  -7  287.37   15.40
  -5  -1   7  255.47   13.50
  -5  -1   7  278.47   14.70
   5   1   7  291.27   16.00
  -5   1  -7  254.87   15.30
  -6  -1  -7    4.70    3.60
  -6   1   7    7.90    3.80
  -6  -1  -7    6.40    3.50
  -6   1   7    5.70    2.40
   6  -1   7    3.40    3.40
   6  -1   7    5.40    3.10
   6   1   7    0.30    2.90
  -6  -1   7    7.40    3.00
  -6  -1   7    6.00    3.30
  -6   1  -7    0.70    3.20
   6   1   7    4.10    2.70
  -6   1  -7    4.10    3.00
  -7   1   7  159.78   10.20
  -7   1   7  138.39   11.70
   7  -1   7  163.08   12.60
   7  -1   7  162.28   11.10
  -7  -1  -7  151.68   12.60
   7   1   7  175.58   13.30
  -7  -1   7  184.48   11.20
  -7  -1   7  175.28   12.60
  -7   1  -7  175.28   13.20
   7   1   7  150.98   10.80
  -8  -1  -7   94.49   11.70
   8  -1   7   93.29   11.20
  -8   1   7   94.89   11.20
  -8   1  -7  109.79   12.40
   8   1   7   93.79   13.00
  -8  -1   7   81.19   10.30
   0   2   7  439.46   19.00
   0  -2   7  432.66   18.60
   0   2   7  441.46   19.60
   0  -2   7  447.76   20.00
   0  -2   7  444.86   19.60
   0  -2  -7  459.35   18.70
   0   2  -7  446.96   18.00
   0  -2  -7  446.86   18.70
   0  -2  -7  441.96   19.60
   0  -2  -7  427.46   18.60
   0  -2   7  461.75   18.70
   0   2   7  430.26   19.10
   0   2  -7  423.16   19.80
   0   2  -7  441.36   18.00
  -1  -2  -7 1469.55   57.89
  -1  -2  -7 1467.15   57.29
   1  -2   7 1479.85   58.09
   1   2  -7 1400.96   55.29
  -1   2   7 1375.56   55.79
   1  -2   7 1510.75   57.99
  -1   2   7 1422.56   57.09
   1  -2   7 1421.16   56.89
   1  -2   7 1413.16   56.89
  -1  -2  -7 1444.66   56.99
   1   2  -7 1255.97   57.59
  -1   2   7 1479.55   56.79
  -1   2   7 1433.66   56.79
   1   2  -7 1398.46   55.39
  -1  -2  -7 1508.25   57.09
  -1  -2  -7 1373.06   55.49
  -1   2  -7 1416.06   56.49
   1  -2  -7 1452.95   57.09
   1   2   7 1365.86   57.69
   1  -2  -7 1411.66   55.59
  -1   2  -7 1380.96   57.89
  -1  -2   7 1495.35   58.09
  -1   2  -7 1515.25   56.69
   1  -2  -7 1457.65   56.39
  -1  -2   7 1375.86   56.29
   1   2   7 1390.66   57.19
   1   2   7 1440.26   57.29
  -1   2  -7 1408.96   57.79
  -1  -2   7 1398.96   56.19
   1  -2  -7 1449.06   56.19
  -2   2   7  169.18    8.40
  -2   2   7  170.58    8.90
   2  -2   7  175.78   10.00
   2   2  -7  165.88    7.60
   2  -2   7  171.58    9.30
  -2   2   7  177.48    8.90
   2  -2   7  163.88    9.20
  -2  -2  -7  164.08    9.40
  -2  -2  -7  168.08    9.20
  -2  -2  -7  164.18    9.50
  -2  -2  -7  169.58    9.20
   2   2  -7  177.18    7.70
  -2   2  -7  166.68    9.90
  -2  -2   7  156.78    8.40
   2   2   7  152.78    9.30
  -2  -2   7  168.88    8.40
   2   2   7  149.09    9.20
  -2   2  -7  165.18    9.70
   2  -2  -7  169.48    8.40
  -2   2  -7  161.78    9.00
   2   2   7  175.38    9.80
   2  -2  -7  179.48    8.30
  -2  -2   7  168.78    9.90
   2  -2  -7  171.68    8.40
  -3   2   7   47.80    4.90
   3  -2   7   55.59    5.80
  -3   2   7   54.09    4.70
  -3  -2  -7   55.59    6.00
  -3   2   7   54.39    3.70
   3  -2   7   56.39    5.80
  -3  -2  -7   59.69    5.80
   3   2  -7   61.59    4.10
   3  -2  -7   56.59    3.70
  -3   2  -7   60.59    6.30
   3   2   7   73.29    6.70
  -3  -2   7   55.39    3.70
  -3  -2   7   59.69    4.70
   3  -2  -7   56.49    4.40
  -3  -2   7   67.79    4.90
   3   2   7   50.09    5.60
  -3   2  -7   54.29    6.00
   3   2   7   58.69    5.90
  -3   2  -7   60.69    5.20
   4  -2   7   29.00    4.50
  -4   2   7   30.20    4.20
   4   2  -7   23.60    3.20
  -4  -2  -7   25.20    4.40
   4  -2   7   23.10    4.30
  -4   2   7   27.20    2.50
  -4  -2  -7   30.00    4.60
  -4   2   7   28.80    4.40
  -4   2  -7   24.80    4.50
   4   2   7   29.00    4.80
  -4   2  -7   14.30    3.90
   4  -2  -7   23.40    3.50
  -4  -2   7   22.10    3.50
  -4   2  -7   24.30    4.20
  -4  -2   7   23.70    3.90
   4   2   7   24.30    4.10
   4  -2  -7   23.20    2.20
  -4  -2   7   27.60    2.50
   4   2   7   27.90    4.70
  -5   2   7   10.00    3.40
  -5  -2  -7   12.20    3.80
  -5  -2  -7   13.00    4.00
  -5   2   7   11.10    2.30
   5  -2   7    9.40    3.20
  -5   2   7    9.40    3.20
   5  -2   7   11.60    3.90
   5   2  -7    8.10    2.60
  -5   2  -7    7.70    3.90
   5   2   7   19.70    4.60
  -5  -2   7    3.10    2.50
  -5  -2   7    8.90    1.10
   5  -2  -7    8.10    2.80
   5   2   7   14.00    3.70
  -5  -2   7    5.20    2.50
   5   2   7   10.40    3.70
  -5   2  -7    9.20    3.90
  -5   2  -7    9.70    3.20
  -5  -2   7   12.30    3.40
  -6   2   7  125.89   10.10
  -6  -2  -7  123.99   10.40
  -6  -2  -7  112.99   11.20
  -6   2   7  128.69    7.90
   6  -2   7  140.79   11.00
  -6   2  -7  125.39   11.00
  -6  -2   7  142.19    9.50
  -6   2  -7  143.09   10.80
   6   2   7  125.69   10.60
   6   2   7  106.59    8.90
  -6  -2   7  120.09    9.90
  -6   2  -7  145.99   11.20
   7  -2   7  134.99   10.20
   7  -2   7  121.49   12.80
  -7   2   7  152.78   12.10
  -7  -2  -7  160.58   12.80
   7   2   7  161.98   12.90
  -7  -2   7  177.58   11.40
  -7   2  -7  146.69   12.90
   7   2   7  153.38   10.90
  -7  -2   7  147.69   11.90
  -7   2  -7  158.68   12.70
  -8   2   7   59.49    9.10
   8  -2   7   47.60   13.00
  -8  -2  -7   67.59    9.50
  -8  -2   7   52.39    8.50
  -8   2  -7   52.29    8.80
  -8  -2   7   55.09    7.60
  -8   2  -7   66.99    9.50
   0   3   7 2380.26   93.89
   0  -3   7 2469.85   94.49
   0  -3  -7 2497.95   93.59
   0   3  -7 2412.16   94.89
   0  -3  -7 2331.17   91.89
   0   3  -7 2281.27   92.99
   0  -3  -7 2321.97   93.49
   0   3   7 2327.37   94.19
   0  -3   7 2358.16   93.39
   0   3  -7 2383.36   92.89
   0  -3  -7 2443.16   94.29
   0  -3   7 2355.86   93.49
   0   3   7 2296.17   91.89
   0   3   7 2396.36   94.09
   0  -3   7 2325.47   94.99
   1  -3   7  142.99    8.50
  -1  -3  -7  162.18    8.70
  -1  -3  -7  130.59    8.30
  -1   3   7  146.19    8.60
   1   3  -7  148.29    7.70
  -1   3   7  158.18    8.80
  -1  -3  -7  153.18    7.30
   1   3  -7  150.28    7.60
  -1   3   7  158.18    7.60
  -1  -3  -7  162.58    9.30
   1  -3   7  159.88    8.80
   1   3  -7  144.59    9.50
  -1   3   7  143.99    8.50
   1  -3  -7  160.18    8.40
   1  -3  -7  164.88    8.30
  -1   3  -7  135.09    9.20
   1  -3  -7  164.58    8.80
   1   3   7  156.58    8.90
  -1   3  -7  173.38    8.50
  -1  -3   7  163.08    8.40
  -1  -3   7  153.78    8.20
   1   3   7  158.18    9.10
  -1   3  -7  165.48    8.40
   1   3   7  160.58    9.30
  -2  -3  -7  347.97   16.20
  -2  -3  -7  337.27   14.70
  -2   3   7  358.36   15.20
   2  -3   7  338.07   16.00
   2   3  -7  325.87   14.40
   2  -3   7  344.17   16.00
  -2  -3  -7  338.47   16.20
  -2   3   7  318.47   15.60
  -2   3   7  341.17   15.70
  -2   3   7  329.67   15.00
   2  -3  -7  332.17   15.20
   2   3   7  302.57   15.90
   2   3   7  315.17   16.00
   2  -3  -7  315.77   14.90
   2  -3  -7  303.87   13.60
  -2  -3   7  327.57   15.10
   2   3   7  313.17   16.10
  -2  -3   7  327.07   15.00
  -2  -3   7  285.77   14.90
  -2   3  -7  314.77   16.50
  -2   3  -7  271.17   15.90
  -3  -3  -7  253.07   13.50
   3  -3   7  264.47   13.70
   3  -3   7  242.38   13.50
  -3   3   7  255.67   11.90
  -3   3   7  267.87   13.40
  -3   3   7  257.77   13.20
  -3  -3  -7  254.67   13.70
   3   3  -7  230.68   11.80
  -3   3  -7  220.18   13.90
   3  -3  -7  248.38   11.80
  -3  -3   7  244.18   12.60
   3   3   7  225.48   13.50
  -3  -3   7  235.48   11.80
   3   3   7  249.58   13.80
  -3  -3   7  248.48   12.80
   3  -3  -7  254.97   10.80
  -3   3  -7  232.98   13.60
   3  -3  -7  240.48   12.50
  -3   3  -7  254.27   13.30
   3   3   7  243.48   13.30
  -4  -3  -7  179.38   11.60
   4   3  -7  182.58   10.10
   4  -3   7  180.58   11.70
  -4   3   7  179.18   11.20
  -4  -3  -7  185.38   11.70
  -4   3   7  198.38   11.50
   4   3   7  170.18   10.90
  -4   3  -7  175.68   11.30
   4   3   7  151.48   11.30
   4  -3  -7  181.58    9.10
   4   3   7  188.48   11.90
  -4  -3   7  190.28    9.40
  -4  -3   7  179.88   10.70
   4  -3  -7  195.28   10.80
  -4  -3   7  172.08   10.80
  -4   3  -7  190.28   11.90
   4  -3  -7  200.48    8.90
  -4   3  -7  174.28   12.20
   5  -3   7  318.07   17.40
   5  -3   7  262.47   16.30
  -5  -3  -7  267.67   16.50
  -5   3   7  268.47   16.10
  -5   3   7  295.97   16.50
  -5  -3  -7  271.37   16.60
  -5  -3   7  299.67   13.20
   5   3   7  306.47   17.60
  -5   3  -7  284.67   17.30
  -5  -3   7  293.77   16.20
  -5   3  -7  308.97   17.30
  -5  -3   7  293.77   16.00
  -5   3  -7  301.17   16.70
   5   3   7  313.97   17.20
   5  -3  -7  285.67   16.00
   5   3   7  290.67   16.00
   6  -3   7  181.28   12.60
  -6  -3  -7  150.48   11.90
  -6   3   7  134.19   11.00
  -6   3   7  155.88    8.80
  -6  -3  -7  116.39   12.10
   6   3   7  155.78   10.70
  -6   3  -7  142.89   11.60
  -6  -3   7  145.79   11.10
  -6   3  -7  146.19   12.40
   6   3   7  139.79   11.70
  -6   3  -7  147.09   14.80
  -6  -3   7  152.68   10.50
   7  -3   7   24.20    6.10
  -7  -3  -7   22.90    6.30
  -7   3   7   34.20    6.70
  -7   3  -7   33.60    7.50
  -7  -3   7   40.00    6.30
  -7  -3   7   31.70    6.40
   7   3   7   35.60    6.90
   7   3   7   34.50    6.00
  -7   3  -7   31.10    6.30
  -8  -3  -7  732.23   39.10
  -8   3   7  795.72   39.40
  -8   3  -7  733.13   38.80
  -8   3  -7  813.42   41.20
  -8  -3   7  785.12   39.20
  -8  -3   7  852.21   37.80
   0   4   7  516.85   22.10
   0  -4  -7  465.15   19.80
   0   4   7  468.75   19.80
   0  -4  -7  459.85   21.30
   0   4   7  445.16   21.50
   0  -4   7  449.36   21.30
   0   4   7  479.45   21.90
   0  -4   7  501.15   21.50
   0   4  -7  449.26   22.40
   0   4  -7  449.66   20.60
  -1  -4  -7   78.49    4.90
   1   4  -7   70.19    7.50
   1  -4   7   82.79    6.30
   1  -4   7   87.99    6.40
  -1  -4  -7   83.59    6.40
   1   4  -7   77.29    5.50
  -1   4   7   96.19    5.50
  -1   4   7   92.29    6.50
  -1   4   7   81.39    6.40
  -1   4   7   82.39    6.50
  -1  -4   7   90.19    8.20
  -1   4  -7   74.89    7.60
   1   4   7   84.59    6.70
  -1  -4   7   75.19    5.90
   1   4   7   83.59    6.60
   1   4   7   78.09    6.50
   1  -4  -7   79.49    6.20
  -1  -4   7   83.89    6.20
  -2   4   7  664.33   28.60
  -2   4   7  656.83   28.90
  -2   4   7  656.73   29.60
   2  -4   7  651.43   29.70
  -2  -4  -7  697.33   28.40
   2  -4   7  681.93   29.90
  -2   4   7  676.73   29.80
   2   4  -7  685.83   28.40
  -2  -4  -7  680.33   29.90
   2   4   7  665.63   29.90
  -2   4  -7  638.04   29.10
   2   4   7  626.54   29.80
   2   4   7  691.73   30.30
  -2  -4   7  640.44   29.00
   2  -4  -7  707.43   29.10
   2  -4  -7  646.14   27.60
  -2  -4   7  659.63   29.00
  -2   4  -7  588.54   30.30
  -2  -4   7  713.53   29.20
  -3   4   7  234.28   12.50
   3  -4   7  236.68   13.30
  -3   4   7  220.48   12.80
  -3  -4  -7  233.78   12.10
  -3  -4  -7  218.48   13.20
   3  -4   7  222.38   13.10
  -3   4   7  212.98   12.60
  -3   4   7  210.08   11.40
   3   4  -7  217.88   11.50
  -3  -4  -7  215.98   13.00
  -3   4  -7  227.48   12.80
  -3   4  -7  203.88   13.40
   3   4   7  225.68   13.40
  -3  -4   7  208.08   12.30
  -3   4  -7  219.88   13.30
   3   4   7  230.08   13.40
   3  -4  -7  224.28   10.60
  -3  -4   7  221.88   12.30
  -3  -4   7  245.98   12.00
   3   4   7  208.68   12.80
   3  -4  -7  222.88   11.60
  -4   4   7  681.23   31.30
  -4  -4  -7  719.53   32.20
   4   4  -7  729.53   30.30
  -4  -4  -7  651.13   31.60
   4  -4   7  677.43   31.90
   4  -4   7  745.23   32.40
  -4   4   7  700.73   31.80
  -4   4   7  781.92   32.40
   4  -4  -7  679.13   29.20
   4   4   7  636.14   31.10
   4   4   7  678.73   32.20
  -4  -4   7  671.63   29.40
   4  -4  -7  635.54   28.40
  -4  -4   7  668.33   30.80
  -4   4  -7  620.04   31.70
   4   4   7  708.03   32.40
  -4   4  -7  671.53   31.40
  -4  -4   7  650.43   31.00
  -4   4  -7  704.23   33.00
  -5  -4  -7  363.76   20.80
  -5  -4  -7  390.56   21.20
  -5   4   7  389.76   21.00
  -5   4   7  411.66   21.30
  -5   4  -7  386.56   20.90
   5   4   7  365.46   21.20
   5   4   7  410.46   20.60
  -5   4  -7  411.66   22.60
  -5  -4   7  399.56   20.80
  -5   4  -7  371.56   21.20
  -6   4   7  920.51   42.50
   6  -4   7  943.41   42.70
  -6   4   7  926.31   42.30
  -6  -4  -7  856.31   42.30
  -6   4  -7  943.81   42.80
   6   4   7  922.31   42.80
  -6   4  -7  927.31   43.90
  -6  -4   7  864.01   41.60
   6   4   7  867.21   40.60
  -7   4   7  208.18   14.70
  -7  -4  -7  165.28   14.10
   7  -4   7  161.68   14.00
  -7   4   7  200.18   15.10
   7   4   7  183.28   12.80
  -7   4  -7  207.58   15.60
  -7  -4   7  184.48   14.10
   7   4   7  196.18   14.90
  -7   4  -7  183.28   14.40
  -7  -4   7  202.48   13.60
   0  -5  -7  195.88   12.00
   0  -5   7  224.78   12.50
   0  -5   7  225.08   12.40
   0   5   7  211.18   12.50
   0   5   7  217.38   12.70
   0   5  -7  200.78   13.30
   0   5   7  211.58   10.90
   0   5   7  222.78   12.50
   0  -5  -7  231.78   11.00
  -1  -5  -7  154.08    8.50
  -1   5   7  145.09    9.70
  -1  -5  -7  152.38    9.90
  -1   5   7  147.99   10.00
   1  -5   7  145.19    9.80
  -1   5   7  154.08    8.70
   1   5  -7  153.58   10.70
  -1   5   7  172.78   10.50
   1   5  -7  148.19    9.10
   1  -5   7  149.09    9.80
  -1  -5   7  155.38    9.60
   1   5   7  159.68   10.40
   1   5   7  160.18   10.40
   1  -5  -7  157.58    9.80
  -1   5  -7  147.59   10.50
   1   5   7  144.39   10.00
  -1  -5   7  148.69    9.70
  -1   5  -7  143.89    9.20
   2   5  -7   33.50    5.50
   2   5  -7   26.90    4.00
  -2   5   7   32.90    4.70
  -2  -5  -7   50.19    6.10
  -2   5   7   33.40    4.40
   2  -5   7   24.90    4.50
   2  -5   7   39.50    5.50
  -2   5   7   45.00    5.80
  -2   5   7   32.50    5.10
  -2  -5  -7   36.00    4.30
  -2  -5   7   31.70    4.70
  -2   5  -7   31.30    5.60
   2   5   7   35.70    5.50
   2   5   7   32.10    5.30
   2  -5  -7   29.30    4.50
   2  -5  -7   33.00    3.90
  -2  -5   7   30.20    4.70
   2   5   7   43.70    5.70
  -2   5  -7   31.60    4.70
  -3   5   7   92.79    7.30
  -3   5   7  110.79    8.00
   3  -5   7  113.99    9.10
   3   5  -7  108.09    7.60
  -3   5   7  113.69    8.90
  -3   5   7  113.49    8.90
  -3  -5  -7   98.09    9.40
   3  -5   7   90.39    9.10
   3  -5  -7  108.49    8.10
  -3   5  -7  101.79    8.20
  -3  -5   7  100.39    8.20
   3   5   7  101.49    8.80
   3  -5  -7  108.99    6.70
  -3   5  -7  111.19    9.30
  -3  -5   7   96.29    7.80
   3   5   7   91.29    9.10
   3   5   7  108.69   10.30
   4  -5   7   51.99    8.40
  -4   5   7   40.20    6.00
  -4  -5  -7   44.30    6.80
  -4  -5  -7   34.80    6.10
  -4   5   7   41.10    6.30
   4  -5   7   40.20    6.30
   4   5   7   37.60    6.00
  -4   5  -7   48.60    6.40
  -4   5  -7   21.10    5.30
  -4  -5   7   37.50    6.00
   4   5   7   34.10    5.80
  -4   5  -7   30.80    6.00
  -5   5   7  108.59   10.80
  -5  -5  -7  112.19   11.00
  -5   5   7  103.69   10.20
   5  -5   7   92.49   10.40
  -5  -5  -7   81.69    9.60
   5   5   7  103.39   10.90
   5   5   7   96.99    9.80
  -5   5  -7   94.69   10.70
  -5  -5   7  101.69   10.30
  -5   5  -7   82.39   10.60
  -6  -5  -7    3.60    4.10
   6  -5   7   10.50    4.70
  -6   5   7    5.70    4.10
  -6   5   7   -0.80    3.30
   6   5   7    7.60    3.90
  -6   5  -7    8.00    5.10
   6   5   7    2.20    4.20
  -6   5  -7    9.60    4.70
  -6  -5   7    7.10    4.10
  -7  -5  -7  189.08   15.00
  -7   5   7  170.78   14.60
  -7   5   7  184.98   14.60
   7  -5   7  163.28   14.30
  -7   5  -7  196.48   16.30
  -7  -5   7  209.38   15.20
  -7   5  -7  190.38   14.50
   7   5   7  191.28   13.80
  -7  -5   7  163.58   13.40
   0   6   7  236.68   14.00
   0  -6   7  220.58   13.10
   0  -6  -7  207.28   13.00
   0  -6   7  234.28   13.40
   0  -6  -7  203.58   11.40
   0   6  -7  214.88   12.30
   0   6   7  206.88   11.60
   0   6   7  198.18   13.00
   0   6  -7  209.28   13.80
   0   6   7  223.88   13.60
  -1   6   7  351.36   18.30
  -1  -6  -7  331.77   16.00
   1   6  -7  313.47   18.60
   1  -6   7  354.46   18.00
   1  -6   7  313.97   17.50
  -1   6   7  315.37   17.70
  -1  -6  -7  283.07   17.10
  -1   6   7  348.17   17.60
  -1   6   7  320.67   16.10
   1  -6  -7  305.47   17.20
  -1  -6   7  328.57   17.40
  -1   6  -7  290.17   18.10
  -1  -6   7  305.67   17.20
   1   6   7  356.46   18.30
   1   6   7  324.37   17.80
  -1   6  -7  296.77   16.60
   1   6   7  354.16   18.30
  -2   6   7  133.79    9.70
  -2   6   7  132.69    9.00
  -2   6   7  145.39   10.70
  -2  -6  -7  132.89   10.20
   2  -6   7  128.19   10.10
   2   6  -7  126.19   10.90
  -2   6   7  151.88   10.80
   2  -6   7  123.19   10.00
   2  -6  -7  145.39   10.00
  -2   6  -7  124.19    9.50
   2   6   7  142.39   10.60
  -2   6  -7  147.69   11.20
   2   6   7  147.99   10.60
  -2  -6   7  140.89    9.90
   2   6   7  135.69   10.70
  -2  -6   7  145.89   10.10
  -3   6   7   58.69    6.80
  -3   6   7   73.29    8.30
  -3   6   7   54.99    6.40
  -3  -6  -7   60.69    7.70
   3  -6   7   67.99    8.10
   3   6   7   65.39    7.80
  -3   6  -7   52.99    7.70
  -3  -6   7   41.00    6.40
   3   6   7   49.70    7.20
  -4  -6  -7    7.30    3.70
  -4   6   7    9.60    4.10
  -4  -6  -7    8.90    4.00
   4  -6   7    5.80    3.60
  -4   6   7    6.90    3.50
   4   6   7    6.50    3.70
  -4   6  -7    6.60    4.60
  -4  -6   7   11.60    4.10
   4   6   7    6.10    4.00
   5  -6   7    4.50    4.10
  -5   6   7    2.20    3.60
  -5  -6  -7    0.30    3.50
  -5   6   7    3.10    3.60
   5   6   7   -1.40    2.90
  -5   6  -7    3.30    3.30
  -5  -6   7   -0.80    3.20
   5   6   7    6.80    4.10
  -6   6   7    2.50    3.90
  -6  -6  -7    3.30    4.40
  -6   6   7    8.70    4.60
  -6   6  -7    5.60    4.20
   6   6   7    3.40    3.80
  -6  -6   7    6.70    4.40
   6   6   7    7.90    4.60
   0  -7  -7  423.86   23.00
   0   7  -7  437.36   23.90
   0   7   7  441.06   21.30
   0   7   7  444.76   23.40
   0  -7   7  430.56   22.90
   0   7   7  446.16   22.90
  -1   7   7  278.77   16.40
  -1   7   7  283.27   15.30
  -1   7   7  295.87   17.20
   1   7  -7  261.97   17.50
   1  -7   7  269.07   16.60
  -1  -7  -7  269.07   16.40
  -1  -7   7  281.87   16.60
   1   7   7  278.17   16.90
  -1   7  -7  261.87   17.50
   1   7   7  283.27   16.90
  -2   7   7   65.99    8.00
  -2  -7  -7   71.29    9.80
   2  -7   7   80.99    9.10
   2   7  -7   78.09    9.80
  -2   7   7   67.99    7.50
  -2   7   7   64.79    8.60
   2   7   7   81.49    9.30
   2   7   7   63.79    8.30
  -2   7  -7   63.69    9.10
  -2  -7   7   71.29    8.30
  -3   7   7  209.38   12.80
   3  -7   7  201.88   14.00
  -3   7   7  195.68   12.60
  -3   7   7  163.38   13.10
  -3   7  -7  184.78   14.00
   3   7   7  185.68   13.80
   3   7   7  159.08   12.80
  -3  -7   7  182.48   13.00
  -4   7   7   73.59    8.90
   4  -7   7   71.89    9.40
  -4   7   7   67.89    8.90
   4   7   7   54.59    8.20
   4   7   7   87.99   10.30
  -4  -7   7   57.19    8.30
  -4   7  -7   63.99    9.80
   5  -7   7   24.00    6.30
  -5   7   7   11.10    5.30
  -5   7   7   25.90    6.10
  -5  -7  -7   14.00    5.20
   5   7   7   29.30    6.70
  -5  -7   7   20.70    5.60
   5   7   7   26.60    6.10
  -5   7  -7   29.80    7.30
  -6   7   7   64.29   10.10
   6  -7   7   60.19    9.70
  -6   7   7   76.99   10.90
  -6  -7  -7   56.99    9.20
  -6   7  -7   70.49   11.60
  -6  -7   7   93.29   11.50
   6   7   7   65.19    9.40
   0   8   7   24.70    6.00
   0   8   7   21.70    4.70
   0   8   7   22.40    5.90
   0  -8   7   23.50    5.50
   0   8  -7   36.00    7.40
   1  -8   7  256.27   17.30
  -1   8   7  296.77   17.60
   1   8  -7  268.87   18.50
  -1   8   7  279.47   17.60
  -1   8   7  286.07   16.00
  -1   8  -7  277.47   18.40
   1   8   7  290.97   18.00
  -1  -8   7  278.57   17.60
   1   8   7  298.67   18.40
  -2   8   7  274.87   16.50
  -2   8   7  291.67   17.60
  -2   8   7  289.67   18.10
   2   8  -7  315.37   19.90
   2  -8   7  302.77   18.40
   2   8   7  267.17   17.50
  -2   8  -7  265.57   18.70
  -2  -8   7  274.37   17.60
   2   8   7  285.47   18.40
   3  -8   7   34.20    6.90
  -3   8   7   21.90    5.40
  -3   8   7   25.60    6.10
  -3  -8   7   32.30    6.70
   3   8   7   21.70    6.10
   3   8   7   22.60    6.20
  -3   8  -7   25.20    6.80
   4  -8   7  109.99   12.90
  -4   8   7  127.49   11.10
  -4   8   7  149.99   14.30
   4   8   7  143.19   13.60
  -4   8  -7  148.29   15.50
   4   8   7  105.09   12.50
  -4  -8   7  135.49   13.30
  -5   8   7   14.70    5.10
  -5   8   7    9.80    5.50
  -5  -8  -7    3.80    4.60
   5  -8   7    1.10    4.60
  -5   8  -7   11.30    5.90
  -5  -8   7    5.00    4.40
   5   8   7   10.70    5.10
   0   9  -7   37.30    7.50
   0   9   7   40.30    8.30
   0   9   7   43.40    7.90
   0   9   7   42.10    7.60
   0  -9   7   36.50    7.50
  -1   9   7  138.09   13.90
   1   9  -7  127.89   14.60
  -1   9   7  135.09   13.60
  -1   9   7  142.59   14.40
   1  -9   7  145.29   14.10
   1   9   7  155.48   14.70
  -1   9  -7  164.98   14.20
   1   9   7  162.38   13.60
  -1  -9   7  153.58   14.50
  -2   9   7  147.39   14.70
  -2   9   7  147.59   12.00
  -2   9   7  161.98   13.10
   2  -9   7  136.39   13.90
  -2   9  -7  150.68   15.70
   2   9   7  117.69   13.00
   2   9   7  162.58   15.50
  -2  -9   7  147.59   14.30
  -3   9   7   93.39   11.80
   3  -9   7   94.69   11.90
  -3  -9   7   95.89   11.70
   3   9   7   98.99   12.40
   0   0  -8    8.80    1.80
   0   0   8    7.60    1.60
   0   0   8   13.10    2.00
   0   0   8   11.70    1.20
   0   0   8    7.40    1.10
  -1   0   8  716.73   30.70
  -1   0  -8  738.13   31.10
  -1   0   8  744.53   29.80
   1   0   8  723.83   30.30
  -1   0  -8  733.03   30.40
   1   0   8  767.42   30.40
  -1   0  -8  755.12   29.80
  -1   0   8  755.92   30.60
   1   0   8  738.13   31.20
  -1   0  -8  786.02   29.90
  -2   0   8  808.82   32.20
  -2   0  -8  835.42   33.10
  -2   0  -8  798.92   33.90
  -2   0   8  801.22   31.40
   2   0   8  805.42   33.40
   2   0   8  870.71   34.30
   2   0   8  770.22   33.80
   2   0   8  726.43   33.10
  -2   0   8  823.12   31.90
  -2   0   8  743.63   31.80
  -2   0  -8  801.72   33.10
  -2   0  -8  787.82   32.90
   3   0  -8  120.09    5.70
  -3   0   8  119.89    5.50
  -3   0  -8  104.99    7.90
  -3   0   8  123.99    5.80
  -3   0  -8  112.29    7.50
   3   0   8  130.79    8.00
  -3   0   8  112.19    6.70
   3   0   8  109.99    7.70
   3   0   8  103.89    7.60
  -3   0   8  126.49    6.90
  -3   0  -8  119.99    7.70
   3   0  -8  116.69    5.70
  -4   0  -8    0.10    1.60
   4   0   8    2.40    2.10
   4   0   8    1.10    2.10
   4   0  -8    1.60    1.40
   4   0   8   -1.10    1.90
  -4   0   8    3.10    1.90
  -4   0   8    0.50    1.50
  -4   0   8    0.70    1.20
  -4   0  -8    0.00    1.80
   5   0   8   38.30    5.90
   5   0   8   36.80    5.80
  -5   0   8   28.90    3.60
  -5   0  -8   38.20    6.10
  -5   0   8   35.40    4.90
   5   0   8   29.10    4.70
  -5   0   8   36.50    5.00
  -5   0  -8   27.40    5.00
   5   0  -8   31.40    4.00
  -6   0   8    4.80    3.10
  -6   0   8    2.10    1.90
  -6   0  -8    2.90    3.00
   6   0   8    1.30    2.40
  -6   0  -8    1.70    2.50
   6   0   8    0.50    2.90
   7   0   8 1222.58   52.59
  -7   0   8 1230.98   53.99
  -7   0   8 1205.68   51.29
  -7   0  -8 1258.47   55.29
   7   0   8 1186.18   54.69
  -8   0  -8  126.89   13.30
   8   0   8  133.89   10.10
   8   0   8  119.49   13.10
  -8   0   8  106.69   11.90
   0  -1  -8 2137.49   81.49
   0   1   8 2129.59   82.39
   0  -1  -8 2087.99   82.59
   0   1   8 2238.78   82.79
   0  -1   8 2202.98   83.39
   0   1   8 2019.10   82.29
   0   1  -8 2045.60   83.39
   0  -1   8 2131.99   81.89
   0  -1   8 2004.60   81.89
   0   1  -8 2084.39   83.29
   0   1   8 2076.69   81.49
   0  -1   8 2183.78   83.49
   0   1   8 2140.29   83.69
  -1   1   8  407.26   17.60
  -1   1   8  382.66   16.70
  -1  -1  -8  392.66   17.80
  -1   1   8  400.76   16.60
  -1   1   8  385.96   16.60
  -1  -1  -8  401.56   16.50
   1  -1   8  430.16   18.10
  -1  -1  -8  406.56   17.00
   1  -1   8  401.96   17.20
   1  -1   8  402.66   17.30
   1  -1   8  417.76   18.30
  -1  -1  -8  424.56   17.10
   1   1   8  398.76   18.50
  -1  -1   8  398.46   16.00
  -1   1  -8  395.46   16.70
   1   1   8  402.06   17.50
  -1  -1   8  407.26   17.30
  -1   1  -8  411.96   16.70
   1  -1  -8  403.16   16.10
   1   1   8  406.76   17.90
   1   1   8  384.66   17.40
  -1   1  -8  388.86   17.90
  -1  -1   8  415.56   18.10
  -1   1  -8  407.36   18.20
  -1  -1   8  395.86   16.00
   2  -1   8  282.07   13.70
  -2   1   8  278.97   12.70
  -2  -1  -8  285.97   13.50
  -2   1   8  285.17   12.80
  -2   1   8  294.77   12.80
  -2  -1  -8  286.87   14.30
   2  -1   8  312.87   13.90
  -2  -1  -8  287.27   13.50
   2  -1   8  296.57   14.50
  -2  -1   8  270.37   12.40
   2  -1  -8  286.47   11.60
   2   1   8  281.27   14.30
  -2   1  -8  284.97   13.30
  -2   1  -8  309.17   13.60
   2   1   8  252.97   13.60
   2   1   8  300.87   14.00
  -2  -1   8  275.47   14.10
   2  -1  -8  301.77   11.60
  -2  -1   8  285.87   12.40
  -2   1  -8  273.27   14.00
  -2   1  -8  291.57   14.50
   2   1   8  310.47   14.50
   3  -1   8   -1.10    1.60
   3   1  -8    1.70    0.90
  -3   1   8    2.10    1.00
   3  -1   8    6.80    2.30
  -3  -1  -8    0.90    2.10
  -3  -1  -8    0.60    1.60
   3   1  -8    1.00    0.80
  -3   1   8    3.20    1.60
  -3   1   8    1.80    1.50
  -3  -1   8    2.70    1.40
  -3   1  -8    2.20    1.80
   3   1   8    0.80    1.60
   3   1   8    6.50    2.40
   3   1   8    3.30    2.00
  -3  -1   8   12.20    2.20
  -3   1  -8    2.40    2.30
  -3   1  -8    0.00    1.30
   3  -1  -8    1.50    1.10
   4  -1   8   71.79    7.20
  -4  -1  -8   67.39    6.90
  -4  -1  -8   65.99    7.20
   4  -1   8   60.19    6.60
  -4   1   8   77.99    4.00
   4   1  -8   75.29    4.90
  -4   1   8   80.49    5.90
  -4   1   8   61.99    5.40
  -4   1  -8   63.59    7.20
  -4   1  -8   74.89    6.40
   4   1   8   69.79    6.90
  -4  -1   8   65.59    5.40
   4  -1  -8   60.39    4.70
   4   1   8   76.99    7.60
  -4   1  -8   69.79    6.70
  -4  -1   8   68.49    5.50
   4   1   8   62.99    6.80
  -5  -1  -8   78.79    8.10
  -5   1   8   73.29    7.40
   5  -1   8   65.09    7.10
   5  -1   8   88.49    9.00
  -5   1   8   71.79    7.20
  -5  -1  -8   59.89    7.80
   5  -1   8   67.89    7.80
  -5   1   8   78.89    5.00
   5   1  -8   75.89    5.70
  -5  -1   8   68.99    7.00
   5  -1  -8   91.29    6.20
  -5  -1   8   84.09    6.80
   5   1   8  109.39    8.60
   5   1   8   80.89    7.70
  -5   1  -8   70.59    8.10
  -5   1  -8   68.39    8.00
  -5   1  -8   71.69    7.70
   5   1   8   58.89    7.40
  -5  -1   8   78.19    5.90
   6  -1   8   23.00    5.10
  -6   1   8   21.30    4.60
  -6  -1  -8   30.00    5.70
  -6   1   8   30.00    3.90
   6  -1   8   29.70    5.00
  -6  -1  -8   24.20    5.20
   6   1   8   18.80    5.10
  -6   1  -8   22.00    4.90
  -6  -1   8   30.00    5.30
  -6   1  -8   32.90    6.30
  -6  -1   8   30.20    4.60
   6   1   8   23.80    4.70
  -6   1  -8   20.50    5.30
  -7  -1  -8  225.98   15.90
   7  -1   8  225.08   13.90
   7  -1   8  245.58   16.30
  -7   1   8  255.67   15.70
   7   1   8  228.78   16.00
  -7   1  -8  198.88   15.40
   7   1   8  246.68   14.40
  -7   1  -8  236.88   16.40
  -7  -1   8  222.18   13.30
  -7  -1   8  240.68   15.30
   8  -1   8  191.58   15.20
   8  -1   8  181.88   13.10
  -8  -1  -8  194.08   15.40
  -8   1   8  204.98   15.10
  -8   1  -8  202.18   15.40
  -8  -1   8  191.78   14.60
   8   1   8  252.97   17.00
   8   1   8  202.18   13.50
  -8   1  -8  185.38   15.60
   0  -2   8   33.70    2.80
   0  -2  -8   33.80    3.90
   0   2   8   26.30    2.90
   0   2   8   24.40    3.10
   0   2   8   28.20    3.50
   0  -2  -8   29.30    2.80
   0   2  -8   34.60    4.10
   0   2  -8   33.60    2.00
   0   2  -8   34.30    2.00
   0  -2  -8   33.00    3.10
   0  -2   8   37.50    4.20
   0  -2   8   36.20    3.90
   0  -2  -8   32.50    2.80
   0  -2   8   27.50    2.70
   1  -2   8  393.46   17.70
   1  -2   8  373.86   17.40
  -1  -2  -8  371.26   14.80
  -1  -2  -8  388.36   17.50
   1  -2   8  375.16   16.50
  -1   2   8  365.86   16.20
   1  -2   8  350.16   16.30
  -1  -2  -8  382.06   16.40
  -1   2   8  358.56   16.20
  -1  -2  -8  375.16   16.40
  -1   2   8  354.96   16.60
   1   2  -8  378.76   17.50
  -1   2   8  366.76   15.20
  -1  -2  -8  374.26   16.80
   1  -2  -8  395.76   15.60
   1  -2  -8  373.46   16.70
  -1   2  -8  393.66   17.60
  -1  -2   8  350.26   15.60
   1   2   8  332.17   17.10
   1   2   8  343.47   16.60
  -1  -2   8  353.26   15.60
   1  -2  -8  382.96   15.70
  -1   2  -8  350.76   15.80
  -1  -2   8  391.16   17.60
  -1   2  -8  352.36   17.30
  -1   2  -8  370.96   15.90
   1  -2  -8  366.16   15.10
   1   2   8  366.76   16.80
  -2  -2  -8  240.28   12.60
   2  -2   8  230.08   12.20
  -2   2   8  241.08   11.40
  -2   2   8  223.88   11.50
   2   2  -8  237.08    9.90
   2  -2   8  231.78   12.20
  -2  -2  -8  264.67   14.10
   2  -2   8  231.08   12.70
  -2  -2  -8  264.77   13.40
   2   2  -8  239.68    9.90
  -2   2   8  224.68   11.60
   2   2   8  244.78   12.50
  -2   2  -8  254.27   13.20
   2  -2  -8  245.38   11.10
  -2   2  -8  291.67   13.40
   2   2   8  233.68   12.40
   2   2   8  220.88   12.50
  -2   2  -8  260.37   12.00
  -2   2  -8  240.78   13.00
  -2  -2   8  258.97   14.20
   2  -2  -8  245.38   11.00
  -2  -2   8  238.08   11.20
  -2  -2   8  240.78   11.20
   2  -2  -8  260.17   11.60
  -3  -2  -8  220.68   12.20
  -3  -2  -8  222.08   12.70
  -3   2   8  221.98   11.60
   3  -2   8  222.58   12.30
  -3   2   8  226.98   11.70
  -3   2   8  224.88   10.40
   3   2  -8  231.58   10.30
   3   2   8  211.58   12.40
  -3   2  -8  219.38   11.90
  -3  -2   8  222.58   11.20
  -3   2  -8  209.58   12.70
  -3   2  -8  234.48   13.10
   3  -2  -8  258.37   11.30
  -3  -2   8  209.58   11.20
   3   2   8  232.98   12.60
   3   2   8  229.38   12.60
   3  -2  -8  214.28   10.40
  -3  -2   8  240.68   10.60
   4   2  -8  237.88   11.70
  -4   2   8  240.18   13.00
   4  -2   8  249.97   14.00
   4  -2   8  220.18   13.30
  -4  -2  -8  239.08   14.10
  -4   2   8  237.28   13.00
  -4  -2  -8  240.58   13.60
  -4  -2   8  251.17   13.00
   4   2   8  238.98   13.50
   4  -2  -8  247.18   10.50
  -4   2  -8  226.28   13.80
   4   2   8  234.18   13.90
   4  -2  -8  235.98   12.10
  -4   2  -8  236.88   13.40
  -4  -2   8  251.57   12.70
  -4   2  -8  215.98   13.90
   4   2   8  243.78   14.00
  -4  -2   8  254.57   10.70
   5  -2   8   12.80    3.90
  -5  -2  -8   13.30    4.30
  -5   2   8   16.40    4.00
  -5   2   8   21.20    2.50
  -5   2   8   21.00    4.20
   5  -2   8   29.80    5.40
  -5  -2  -8   16.30    3.90
   5   2  -8   20.10    3.50
  -5  -2   8   19.60    1.30
   5   2   8   19.10    4.20
  -5  -2   8   16.00    3.40
   5  -2  -8   19.50    4.10
  -5   2  -8   22.00    4.60
   5   2   8   22.60    5.00
   5   2   8   21.20    4.90
  -5  -2   8   21.20    4.10
  -5   2  -8   20.70    4.90
  -5  -2   8   23.50    4.40
  -5   2  -8   17.20    4.60
  -6   2   8  509.95   25.10
   6  -2   8  487.85   25.60
  -6  -2  -8  488.85   25.90
  -6   2   8  501.05   21.70
  -6  -2  -8  488.95   25.50
   6   2   8  509.15   26.10
  -6  -2   8  494.25   23.50
  -6   2  -8  468.35   26.10
  -6   2  -8  506.05   26.00
   6   2   8  495.35   24.50
  -6  -2   8  488.55   25.00
  -7   2   8   94.79   10.80
  -7  -2  -8  110.39   11.80
   7  -2   8  105.39   11.50
   7  -2   8  143.29   10.20
  -7   2  -8  127.09   13.20
  -7  -2   8  102.99   11.10
   7   2   8  118.29    9.50
  -7   2  -8  112.79   12.10
  -7  -2   8  113.79    9.20
   7   2   8  122.09   12.60
   8  -2   8   70.29    9.00
  -8  -2  -8   72.09   10.30
  -8   2   8   69.89    9.70
   8  -2   8   68.29   10.30
  -8  -2   8   76.99   10.10
   8   2   8   59.49    7.80
  -8   2  -8   73.79   11.20
  -8   2  -8   73.79   10.50
   0  -3  -8 1982.10   76.69
   0  -3   8 1833.82   75.69
   0   3  -8 1991.50   75.19
   0  -3  -8 1963.40   76.79
   0  -3  -8 1972.20   75.89
   0   3  -8 1915.61   74.99
   0   3   8 1883.11   76.29
   0  -3   8 1943.31   75.89
   0   3  -8 1816.92   77.19
   0   3   8 1831.02   76.09
   0   3   8 1868.61   76.69
   1   3  -8   48.80    3.20
  -1  -3  -8   49.20    4.70
   1   3  -8   44.20    3.20
  -1   3   8   46.70    3.10
  -1   3   8   38.10    4.20
  -1   3   8   41.90    4.40
   1  -3   8   45.40    4.50
  -1   3   8   44.50    4.60
   1   3  -8   40.00    5.20
   1  -3   8   50.89    4.30
  -1  -3  -8   42.40    2.70
  -1   3  -8   35.20    5.00
   1   3   8   51.19    5.20
  -1  -3   8   45.70    3.90
  -1   3  -8   45.50    3.80
   1   3   8   45.20    4.70
  -1  -3   8   45.80    3.80
   1  -3  -8   49.30    4.90
   1   3   8   47.20    5.00
   1  -3  -8   44.80    4.20
  -2   3   8  139.69    8.40
  -2  -3  -8  143.29    8.90
  -2  -3  -8  147.09    7.50
  -2   3   8  147.69    8.50
  -2  -3  -8  119.19    8.30
   2   3  -8  137.29    7.10
   2  -3   8  136.09    8.60
  -2   3   8  155.48    8.20
  -2   3   8  148.69    7.90
   2  -3   8  144.39    8.70
   2   3   8  145.99    9.10
  -2  -3   8  130.79    7.80
  -2   3  -8  137.99    8.10
   2   3   8  143.59    9.20
  -2  -3   8  145.59    8.20
   2   3   8  142.99    9.00
   2  -3  -8  148.29    8.10
   2  -3  -8  140.29    7.90
  -2   3  -8  140.59    9.30
  -2  -3   8  119.89    7.50
  -2   3  -8  143.19    9.60
   2  -3  -8  147.19    6.50
  -3   3   8  611.64   27.10
   3   3  -8  617.04   25.40
  -3  -3  -8  606.24   27.80
  -3   3   8  602.84   27.10
  -3   3   8  589.64   25.70
   3  -3   8  625.14   27.80
   3  -3   8  585.14   27.50
  -3  -3  -8  578.14   27.30
   3   3   8  619.64   28.00
   3   3   8  599.04   27.70
   3   3   8  603.24   28.00
   3  -3  -8  633.74   25.80
  -3  -3   8  615.54   25.80
  -3   3  -8  634.84   27.30
  -3  -3   8  566.14   26.20
  -3  -3   8  564.84   26.40
   3  -3  -8  639.54   24.10
  -3   3  -8  576.44   28.00
  -3   3  -8  593.34   28.40
  -4   3   8  766.12   33.70
  -4  -3  -8  682.83   34.00
   4  -3   8  784.02   34.50
   4   3  -8  772.62   31.90
  -4  -3  -8  765.02   34.20
  -4   3   8  730.63   33.40
  -4  -3   8  758.32   33.20
  -4   3  -8  731.23   33.60
  -4  -3   8  753.62   32.90
   4  -3  -8  727.83   30.90
   4  -3  -8  758.62   32.50
   4   3   8  723.63   33.60
   4   3   8  686.13   33.90
  -4  -3   8  797.02   31.30
   4   3   8  822.32   34.80
  -4   3  -8  744.63   34.90
   4  -3  -8  760.22   30.10
  -4   3  -8  735.63   34.50
  -5  -3  -8   98.19   10.20
  -5  -3  -8   98.09    9.70
  -5   3   8  110.39    8.80
   5  -3   8  116.49    9.60
   5  -3   8   97.79    9.70
  -5   3  -8  113.39   10.80
   5   3   8   82.39    8.60
  -5  -3   8   98.09    8.10
  -5   3  -8   94.29    9.30
   5   3   8  110.69   10.70
  -5   3  -8  108.79   10.90
  -5  -3   8  116.39   13.80
   5   3   8   89.69    9.60
  -6   3   8  105.49   10.30
   6  -3   8   94.09   10.30
  -6  -3  -8   98.49   10.60
   6   3   8   96.79    9.50
   6   3   8   86.19   10.10
  -6   3  -8  103.59   11.50
  -6   3  -8  108.29   11.10
  -6  -3   8  106.69    9.00
  -6  -3   8   84.39    8.60
   7  -3   8  214.08   15.50
  -7   3   8  215.18   15.10
  -7  -3  -8  201.78   15.20
   7   3   8  196.78   15.20
  -7  -3   8  199.88   14.50
  -7   3  -8  210.88   16.10
  -7  -3   8  208.68   13.50
  -7   3  -8  204.58   15.30
   7   3   8  241.78   14.30
  -8   3   8  116.19   12.90
  -8  -3  -8  127.29   14.10
  -8  -3   8  140.09   13.70
   8   3   8  134.89   14.60
  -8   3  -8  126.59   13.70
  -8   3  -8  125.39   14.50
   0   4   8  156.68    7.50
   0  -4  -8  153.08    7.50
   0  -4   8  145.99    9.10
   0   4   8  148.09    9.60
   0   4   8  149.09    9.50
   0  -4   8  168.18    9.30
   0   4  -8  167.08    8.60
   0   4  -8  166.98   10.40
   0   4   8  156.48    9.60
  -1  -4  -8 1064.09   42.40
  -1  -4  -8 1047.70   44.40
   1   4  -8  987.10   45.50
   1  -4   8 1122.99   44.70
   1   4  -8 1046.40   43.10
  -1   4   8 1105.99   42.80
  -1   4   8 1054.39   44.40
  -1   4   8 1102.99   44.90
   1  -4   8 1024.40   44.30
  -1   4   8 1037.40   44.50
   1   4   8 1012.70   44.80
   1   4   8 1003.10   44.60
  -1  -4   8 1081.39   44.10
  -1  -4   8 1070.09   44.10
  -1   4  -8 1081.89   45.90
   1   4   8 1078.49   45.10
  -1   4  -8 1081.99   43.80
   1  -4  -8 1058.19   44.10
  -2   4   8  550.74   24.10
   2   4  -8  481.05   22.00
  -2   4   8  541.75   22.70
  -2  -4  -8  500.65   23.80
  -2  -4  -8  506.85   23.90
  -2   4   8  499.75   23.70
   2  -4   8  528.45   24.10
  -2   4   8  495.25   23.00
   2  -4   8  484.85   23.70
  -2  -4  -8  523.75   22.20
   2  -4  -8  525.55   23.20
   2  -4  -8  527.05   23.20
  -2  -4   8  594.24   25.20
  -2  -4   8  465.25   22.90
  -2   4  -8  502.45   25.00
   2   4   8  474.85   24.00
   2   4   8  546.75   24.60
   2  -4  -8  516.45   21.70
  -2  -4   8  487.85   22.90
   2   4   8  507.95   24.10
   3  -4   8  356.36   18.90
  -3  -4  -8  352.96   18.80
  -3  -4  -8  365.86   17.60
  -3   4   8  368.56   18.60
  -3   4   8  369.76   17.90
   3   4  -8  336.47   16.80
  -3   4   8  378.06   18.70
  -3  -4  -8  367.46   18.90
   3  -4   8  379.16   19.10
  -3   4   8  348.87   17.10
   3   4   8  398.16   19.60
   3   4   8  366.26   19.00
   3  -4  -8  379.86   17.40
   3  -4  -8  376.96   15.90
   3  -4  -8  352.76   17.70
  -3  -4   8  376.66   18.20
  -3   4  -8  360.36   19.70
   3   4   8  382.36   19.40
  -3  -4   8  377.76   17.50
  -3   4  -8  363.26   18.30
  -3   4  -8  380.66   19.60
  -3  -4   8  355.76   17.80
  -4   4   8  139.49   10.20
  -4   4   8  128.49    9.80
  -4  -4  -8  131.39   10.10
   4   4  -8  144.19    9.90
  -4  -4  -8  152.38   10.90
   4  -4   8  140.29   10.40
   4  -4   8  157.38   10.80
  -4   4   8  125.39    9.50
   4   4   8  144.19   10.80
  -4   4  -8  133.19    9.80
   4  -4  -8  145.39    8.40
   4   4   8  154.68   10.90
  -4  -4   8  141.19    9.40
  -4   4  -8  141.99   10.80
  -4   4  -8  134.39   11.10
   4   4   8  130.19    9.80
   4  -4  -8  143.29    7.40
  -4  -4   8  158.98    8.70
  -4  -4   8  136.29    9.60
  -5  -4  -8    5.10    3.50
  -5  -4  -8    8.80    3.70
  -5   4   8    2.30    3.50
  -5   4   8    7.60    3.60
   5   4   8    4.80    2.80
   5   4   8    1.70    2.90
  -5   4  -8    7.50    4.00
  -5  -4   8    2.80    2.90
  -5   4  -8    6.60    4.20
   6  -4   8  177.78   13.70
  -6   4   8  184.88   13.40
  -6  -4  -8  182.48   14.00
  -6   4   8  219.18   14.30
   6   4   8  177.68   12.70
  -6   4  -8  189.88   14.90
   6   4   8  186.28   14.10
  -6   4  -8  179.58   13.50
  -6  -4   8  186.78   13.40
  -7   4   8  388.46   22.90
  -7   4   8  415.46   23.80
  -7  -4  -8  403.86   23.80
   7  -4   8  381.76   23.40
  -7  -4   8  404.66   22.00
  -7   4  -8  420.86   24.00
  -7  -4   8  400.16   22.90
   7   4   8  387.56   21.50
   7   4   8  370.56   23.30
  -7   4  -8  391.76   24.60
   0   5   8 1120.49   45.10
   0  -5  -8 1091.79   47.00
   0   5   8 1135.89   47.60
   0   5  -8 1098.89   48.60
   0  -5   8 1150.28   47.10
   0   5   8 1100.79   47.70
   0   5   8 1057.89   47.30
   0   5  -8 1106.59   46.10
   0  -5   8 1139.99   47.20
   0  -5  -8 1109.89   45.00
  -1   5   8   28.60    4.60
  -1  -5  -8   26.00    4.30
   1   5  -8   29.10    3.90
  -1  -5  -8   26.70    3.30
   1  -5   8   29.10    4.60
  -1   5   8   29.60    4.60
  -1   5   8   31.60    4.80
   1  -5   8   27.50    4.50
  -1   5   8   17.90    3.00
   1   5  -8   18.60    4.70
  -1   5  -8   22.20    4.90
   1   5   8   25.20    4.60
   1   5   8   34.60    5.40
  -1  -5   8   24.60    4.00
   1   5   8   30.10    5.00
   1  -5  -8   24.70    4.10
  -1  -5   8   25.50    4.20
   2   5  -8   90.29    6.50
  -2  -5  -8   94.49    6.30
   2  -5   8   92.39    7.70
  -2   5   8   78.39    6.30
   2   5  -8   79.59    8.90
   2  -5   8   94.39    7.80
  -2  -5  -8   94.09    7.70
  -2   5   8   91.69    7.70
  -2   5   8   97.99    7.30
  -2   5   8   97.59    7.90
   2  -5  -8   82.49    5.90
   2   5   8   99.49    9.10
   2  -5  -8   92.29    7.10
  -2  -5   8   98.79    7.40
  -2   5  -8   82.59    7.00
  -2   5  -8   95.49    8.30
   2   5   8   79.09    8.20
  -2  -5   8   85.59    6.90
   2   5   8  100.99    9.50
  -3   5   8  125.99    8.70
   3  -5   8  122.89    9.60
  -3   5   8  120.09    8.20
  -3   5   8  121.99    9.40
  -3   5   8  125.39    9.50
   3  -5   8  117.99    9.40
  -3  -5  -8  105.39    9.20
   3   5  -8  146.19    9.90
  -3  -5  -8   96.79    9.70
  -3   5  -8  123.59   10.40
  -3  -5   8  107.39    8.40
   3   5   8  104.59   10.00
   3   5   8  123.79    9.90
   3   5   8  112.59    9.10
  -3  -5   8  122.79    8.90
  -3   5  -8  116.89    8.80
   3  -5  -8  123.49    7.10
  -4  -5  -8   94.09    9.40
  -4   5   8   66.59    7.90
   4  -5   8   63.39    8.00
  -4   5   8   68.39    7.70
  -4  -5  -8   70.69    8.50
  -4  -5   8   64.59    7.40
  -4   5  -8   45.20    7.90
  -4   5  -8   57.59    8.00
   4   5   8   86.39    8.90
   4   5   8   70.79    8.50
  -5   5   8   16.20    4.90
   5  -5   8   15.00    4.80
  -5   5   8   21.90    5.00
  -5  -5  -8   15.60    4.50
  -5   5  -8   20.30    5.40
  -5   5  -8   18.70    4.90
  -5  -5   8    9.20    3.80
   5   5   8   17.40    4.50
   5   5   8   20.20    5.50
  -6  -5  -8    3.90    4.30
  -6   5   8    7.90    4.10
  -6   5   8    1.20    3.80
   6  -5   8   10.80    4.80
   6   5   8    2.80    3.30
  -6   5  -8    6.40    4.00
  -6  -5   8    1.70    3.60
  -6   5  -8    1.70    3.20
   6   5   8    4.60    3.80
   7  -5   8    7.70    5.00
  -7  -5  -8    9.40    5.30
  -7   5   8    9.00    4.90
  -7   5   8    9.40    4.90
  -7  -5   8    8.10    4.50
   7   5   8   13.60    5.00
  -7  -5   8   17.20    5.30
  -7   5  -8    9.80    4.80
  -7   5  -8    6.60    4.20
   0   6  -8    0.80    3.20
   0  -6  -8    5.40    2.20
   0   6  -8    2.20    1.80
   0  -6   8    5.20    3.00
   0   6   8    0.00    2.70
   0  -6  -8    7.10    3.10
   0   6   8    3.10    3.00
   0   6   8    6.50    2.40
   0   6   8   -0.30    2.60
   0  -6   8    8.50    3.30
   1   6  -8  178.68   13.30
  -1  -6  -8  210.18   12.90
  -1  -6  -8  209.68   11.20
  -1   6   8  209.48   12.90
  -1   6   8  210.78   13.30
   1   6  -8  224.18   13.60
  -1   6   8  211.68   11.50
  -1   6   8  225.68   13.60
   1  -6   8  228.18   13.40
   1  -6   8  199.68   12.90
   1   6   8  202.68   13.30
  -1   6  -8  200.58   12.10
  -1   6  -8  194.08   13.80
  -1  -6   8  206.68   12.70
   1  -6  -8  210.98   12.70
   1   6   8  190.98   12.80
  -1  -6   8  203.48   12.70
   1   6   8  208.58   13.50
  -2   6   8  184.48   10.50
   2   6  -8  182.88   13.10
   2  -6   8  171.18   11.80
  -2   6   8  150.28   11.40
  -2   6   8  166.08   11.00
  -2  -6  -8  140.79   11.00
   2   6   8  176.38   12.00
   2   6   8  160.88   11.90
  -2   6  -8  160.48   12.60
   2   6   8  185.08   12.50
  -2  -6   8  158.88   11.10
   3  -6   8  133.79   10.70
  -3   6   8  144.09    9.90
  -3   6   8  141.19    9.70
  -3   6   8  132.69   10.70
  -3  -6  -8  127.89   10.50
   3   6   8  157.98   11.30
  -3  -6   8  130.99   10.20
   3   6   8  125.09   10.80
  -3   6  -8  143.49   11.80
   4  -6   8  232.58   15.10
  -4   6   8  249.18   14.80
  -4  -6  -8  230.68   15.20
  -4   6   8  217.28   14.90
   4   6   8  232.58   15.70
   4   6   8  251.47   15.50
  -4   6  -8  216.68   16.10
  -4  -6   8  224.38   14.60
  -5   6   8    8.50    3.90
  -5   6   8    7.20    4.30
  -5  -6  -8    9.00    4.50
   5  -6   8    8.80    4.20
   5   6   8    4.90    4.10
  -5  -6   8    3.20    3.70
  -5   6  -8    0.10    4.00
   5   6   8    4.50    4.00
  -6   6   8  152.38   12.70
  -6  -6  -8  116.59   13.20
  -6   6   8  154.68   13.10
  -6  -6   8  153.58   13.00
   6   6   8  133.99   12.90
   6   6   8  165.58   13.70
  -6   6  -8  136.79   15.40
   0  -7   8  713.43   34.40
   0   7   8  731.43   34.70
   0   7   8  752.12   32.50
   0   7  -8  734.43   36.00
   0   7   8  744.83   35.00
  -1   7   8  546.95   28.10
  -1   7   8  566.74   27.80
   1   7  -8  544.05   29.00
  -1   7   8  557.54   25.90
   1  -7   8  556.84   28.00
   1   7   8  551.34   28.00
  -1   7  -8  567.14   29.40
  -1  -7   8  564.34   27.80
   1   7   8  584.64   28.50
  -2   7   8   78.39    8.70
   2   7  -8   61.89    9.20
  -2   7   8   78.49    9.30
  -2   7   8   82.49    8.00
   2  -7   8   70.89    8.90
   2   7   8   79.69    9.60
   2   7   8   83.99    9.40
  -2  -7   8   79.39    8.80
  -2   7  -8   72.39    9.80
   3  -7   8  254.77   16.80
  -3   7   8  259.27   15.30
  -3   7   8  268.57   15.80
  -3   7   8  286.57   17.40
   3   7   8  273.47   17.10
  -3   7  -8  235.58   17.00
   3   7   8  285.47   17.60
  -3  -7   8  267.07   16.50
   4  -7   8   62.79    8.90
  -4  -7  -8   60.29    8.80
  -4   7   8   58.59    8.50
  -4   7   8   70.59    8.50
  -4   7  -8   64.39    9.90
  -4  -7   8   71.59    9.00
   4   7   8   61.39    9.20
   4   7   8   64.29    8.70
   5  -7   8  425.36   24.70
  -5   7   8  417.36   23.70
  -5   7   8  445.06   24.90
  -5  -7  -8  404.96   24.10
   5   7   8  415.76   24.80
  -5  -7   8  438.26   24.10
   5   7   8  402.56   23.60
  -5   7  -8  422.06   25.90
   0  -8   8   39.20    6.90
   0   8   8   34.50    6.40
   0   8  -8   37.70    7.20
   0   8   8   37.90    5.60
   0   8   8   36.40    7.10
   1   8  -8    4.00    4.30
  -1   8   8   -1.00    3.30
   1  -8   8   -1.10    3.00
  -1   8   8   -0.80    2.50
  -1   8   8   -0.50    3.40
  -1  -8   8    1.20    3.40
   1   8   8   -1.30    3.50
   1   8   8   -2.50    3.30
  -1   8  -8    0.80    3.80
  -2   8   8  169.68   12.50
  -2   8   8  144.99   12.70
   2  -8   8  157.98   12.80
   2   8  -8  174.18   14.40
  -2   8   8  158.28   11.10
  -2  -8   8  140.19   12.00
   2   8   8  160.18   13.10
   2   8   8  174.28   12.90
  -2   8  -8  144.29   12.80
   3  -8   8    3.30    4.00
  -3   8   8    7.20    4.00
  -3   8   8    7.80    4.50
   3   8   8    8.50    4.90
  -3  -8   8    9.30    4.50
  -3   8  -8    7.80    4.90
   3   8   8    6.70    4.80
  -4   8   8   35.20    7.50
   4  -8   8   47.30    8.30
  -4   8   8   34.50    6.40
  -4  -8  -8   31.50    6.60
  -4  -8   8   36.50    7.20
   4   8   8   30.10    7.40
  -4   8  -8   21.80    6.80
   4   8   8   32.20    7.10
   0   9   8  284.57   19.00
   0   9  -8  300.77   20.10
   0   9   8  269.17   18.30
   0  -9   8  263.87   18.20
  -1   9   8   10.30    5.20
  -1   9   8   18.80    6.30
   1   9  -8   18.80    6.50
   1  -9   8   22.60    6.00
  -1  -9   8   26.20    6.50
   1   9   8   23.00    6.40
  -1   9  -8   16.70    6.40
   1   9   8   22.60    6.30
   2  -9   8   49.30    8.80
  -2   9   8   72.49    9.60
  -2   9   8   50.79    8.90
  -2   9  -8   62.49   10.30
   2   9   8   54.69    9.40
   2   9   8   66.89    9.50
  -2  -9   8   48.40    8.40
  -3   9   8   13.80    5.80
   3  -9   8    1.40    4.50
   3   9   8    9.60    5.30
  -3  -9   8    6.50    4.50
  -3   9  -8   12.40    6.50
   0   0   9    1.30    1.10
   0   0   9    0.40    1.00
   0   0  -9   -0.20    1.00
   0   0  -9   -1.00    1.10
   0   0   9    0.60    0.70
   0   0   9    0.30    0.70
   0   0   9    2.70    1.80
  -1   0  -9    6.50    1.70
  -1   0   9    8.50    2.00
   1   0   9    9.70    2.30
   1   0   9   10.30    1.90
  -1   0  -9    9.10    1.30
  -1   0  -9    9.90    1.30
  -1   0   9    9.00    1.50
  -1   0  -9    8.20    2.20
  -1   0   9   10.30    1.90
   1   0   9    9.80    1.80
   1   0   9    7.80    1.70
  -2   0   9 1056.49   41.20
  -2   0   9 1001.50   40.80
  -2   0  -9 1114.49   42.50
   2   0   9  987.50   43.50
   2   0   9 1006.00   42.70
  -2   0  -9 1040.80   42.60
   2   0   9 1112.49   45.00
  -2   0  -9  978.40   43.30
  -2   0   9 1114.29   43.00
  -2   0   9 1029.30   41.10
  -2   0  -9 1034.80   42.20
   2   0   9 1020.20   42.80
  -2   0   9 1047.70   41.90
   3   0   9 1274.87   51.99
  -3   0   9 1217.38   50.29
   3   0   9 1289.37   52.09
   3   0   9 1234.08   52.19
  -3   0  -9 1257.67   52.49
  -3   0   9 1221.78   49.30
  -3   0   9 1250.87   49.10
  -3   0   9 1257.57   50.29
  -3   0  -9 1274.97   51.69
  -4   0   9  603.44   26.80
  -4   0   9  582.64   26.60
   4   0  -9  653.73   25.40
   4   0   9  615.84   28.00
  -4   0  -9  604.74   27.80
  -4   0   9  585.74   25.20
  -4   0  -9  607.94   28.70
  -4   0  -9  614.64   28.00
   4   0   9  623.14   28.40
   4   0   9  621.14   28.30
  -5   0  -9 1158.38   52.19
   5   0  -9 1254.27   49.10
   5   0   9 1195.58   52.09
  -5   0  -9 1184.28   51.59
  -5   0   9 1191.28   50.59
   5   0   9 1081.29   50.69
  -5   0   9 1226.58   48.60
   5   0   9 1305.37   52.69
   6   0   9  130.19   10.70
  -6   0   9  122.69    8.00
   6   0   9  144.69   10.10
  -6   0   9  134.29   10.10
  -6   0  -9  127.59   12.20
   7   0   9  148.89   11.10
  -7   0  -9  154.78   12.50
  -7   0   9  153.18   11.90
   7   0   9  176.48   12.90
  -8   0  -9   65.79    9.60
   8   0   9   51.79    7.30
   8   0   9   60.39    9.40
  -8   0   9   47.00    7.90
   0   1  -9 2369.06   95.99
   0  -1   9 2552.04   96.19
   0   1   9 2573.24   95.39
   0   1   9 2408.26   94.79
   0  -1   9 2285.47   94.39
   0  -1   9 2538.45   95.99
   0   1   9 2478.55   94.99
   0   1   9 2470.45   94.09
   0   1  -9 2342.87   95.89
   0  -1  -9 2382.86   95.19
   0  -1   9 2453.55   94.49
   0   1   9 2398.86   96.39
  -1  -1  -9  628.84   27.90
  -1   1   9  641.04   27.80
   1  -1   9  634.84   27.20
   1  -1   9  665.03   28.40
   1  -1   9  636.94   27.30
  -1  -1  -9  661.53   26.50
  -1  -1  -9  672.33   26.90
  -1   1   9  645.64   26.60
  -1  -1  -9  676.63   26.90
  -1   1   9  657.43   26.80
   1  -1   9  669.93   28.20
  -1   1   9  639.34   26.60
  -1   1  -9  662.33   26.40
  -1  -1   9  658.93   25.90
  -1   1  -9  673.33   28.40
  -1   1  -9  632.84   28.00
  -1  -1   9  703.13   28.40
   1  -1  -9  665.53   26.20
  -1  -1   9  678.63   27.40
   1   1   9  684.43   28.20
  -1   1  -9  717.23   26.50
   1   1   9  686.03   27.70
   1   1   9  646.64   27.50
   1   1   9  663.83   28.70
  -1  -1   9  636.64   25.90
  -2   1   9  257.67   12.70
  -2   1   9  265.17   12.50
  -2  -1  -9  290.97   13.50
  -2  -1  -9  269.97   14.20
   2  -1   9  266.77   13.50
   2  -1   9  278.67   13.70
  -2  -1  -9  275.07   12.90
  -2   1   9  286.77   12.60
  -2  -1  -9  284.57   14.30
   2   1   9  287.87   13.90
  -2   1  -9  331.57   14.40
  -2  -1   9  304.07   12.30
  -2   1  -9  275.07   13.10
   2   1   9  266.77   13.70
   2   1   9  269.17   14.40
  -2   1  -9  288.17   14.50
  -2   1  -9  307.37   14.40
  -2  -1   9  294.37   12.20
  -2  -1   9  301.57   14.40
   2   1   9  273.57   14.20
  -3  -1  -9  440.16   21.40
   3  -1   9  434.96   20.80
  -3   1   9  447.96   19.70
  -3   1   9  459.75   18.60
   3  -1   9  487.25   21.20
  -3   1   9  459.75   19.80
   3   1   9  404.96   20.70
  -3  -1   9  429.56   19.30
   3   1   9  448.16   21.00
  -3   1  -9  450.35   21.50
  -3  -1   9  439.56   19.40
   3   1   9  414.56   21.10
  -3   1  -9  444.86   21.10
   3  -1  -9  460.95   18.40
  -4   1   9  381.76   15.40
  -4  -1  -9  377.26   19.50
   4  -1   9  365.46   19.10
   4   1  -9  373.96   16.30
   4  -1   9  392.96   19.40
  -4   1   9  354.86   17.80
  -4  -1  -9  365.16   18.70
  -4   1   9  398.46   18.20
   4   1   9  386.46   19.30
   4  -1  -9  380.56   16.80
  -4   1  -9  369.36   18.60
   4   1   9  416.86   19.70
  -4  -1   9  384.66   17.80
   4   1   9  368.56   19.00
  -4  -1   9  373.56   17.90
  -4  -1   9  391.16   15.20
  -4   1  -9  360.76   19.20
  -4   1  -9  342.97   19.20
  -4  -1   9  383.66   15.20
  -5   1   9   68.59    7.10
   5  -1   9   65.69    7.30
   5   1  -9   70.79    5.40
  -5   1   9   72.79    4.50
  -5  -1  -9   63.19    7.90
   5  -1   9   74.19    8.40
  -5   1   9   62.49    6.90
  -5  -1  -9   68.59    7.80
   5  -1   9   73.09    8.00
  -5   1  -9   63.89    7.40
  -5  -1   9   62.49    6.70
  -5  -1   9   81.29    6.50
  -5  -1   9   74.99    5.70
   5   1   9   73.59    8.50
   5   1   9   71.89    8.00
   5   1   9   65.49    7.40
  -5   1  -9   62.29    7.70
   5  -1  -9   69.99    5.70
  -5   1  -9   74.99    8.50
  -6   1   9   52.69    4.40
   6  -1   9   49.80    7.40
  -6  -1  -9   46.80    7.50
   6  -1   9   56.29    6.90
  -6   1   9   46.40    6.40
   6   1   9   48.00    6.50
  -6  -1   9   54.39    6.90
   6   1   9   55.49    7.80
  -6   1  -9   51.89    7.90
  -6   1  -9   48.90    7.30
  -6  -1   9   52.09    5.70
  -7  -1  -9   63.09    8.80
  -7   1   9   66.59    8.30
   7  -1   9   52.69    7.00
   7  -1   9   45.40    7.80
  -7  -1   9   49.60    7.60
   7   1   9   46.90    7.80
  -7   1  -9   56.19    8.70
  -7  -1   9   48.00    7.20
  -7   1  -9   51.49    8.30
   7   1   9   50.39    6.90
   8  -1   9   35.10    7.70
   8  -1   9   50.29    7.20
  -8   1   9   50.19    8.30
  -8  -1  -9   45.60    8.60
  -8   1  -9   60.09    9.20
   8   1   9   33.70    7.90
   8   1   9   61.99    8.00
  -8  -1   9   38.90    7.40
  -8   1  -9   58.19    9.60
   0  -2   9    6.50    1.50
   0  -2  -9    5.00    1.80
   0  -2   9    6.00    2.10
   0  -2  -9    8.70    1.50
   0  -2  -9    6.60    1.40
   0  -2   9    5.00    1.40
   0   2   9    6.50    1.80
   0  -2  -9    3.80    1.50
   0   2  -9    6.80    2.30
   0   2   9    4.10    1.60
   0  -2   9    7.10    2.30
   0   2   9    8.50    2.50
  -1  -2  -9   98.09    4.20
   1  -2   9   97.69    6.90
  -1  -2  -9   94.49    5.80
  -1   2   9   93.99    5.80
  -1  -2  -9  101.09    6.40
  -1  -2  -9   84.09    6.70
  -1   2   9   99.59    5.90
  -1  -2  -9   99.59    4.20
   1  -2   9   93.39    5.90
  -1   2   9   93.79    6.20
  -1  -2  -9   97.79    5.80
   1   2  -9   77.79    6.50
   1  -2   9  100.49    7.50
   1  -2   9   86.79    5.80
   1  -2  -9   95.19    4.80
   1  -2  -9  105.29    5.10
   1  -2  -9  108.29    5.10
  -1   2  -9  109.29    6.90
   1   2   9  107.19    6.50
  -1  -2   9  103.19    7.00
  -1   2  -9  108.09    5.50
  -1  -2   9   99.89    5.30
   1  -2  -9  101.09    6.40
   1   2   9  106.39    6.40
  -1  -2   9  105.89    6.40
  -1   2  -9  101.49    5.40
  -1  -2   9  103.59    5.30
  -1   2  -9   99.59    6.90
   1   2   9  105.19    7.20
  -2   2   9 1078.49   44.10
  -2  -2  -9 1072.49   45.30
  -2  -2  -9 1106.89   44.80
  -2   2   9 1079.89   44.20
   2  -2   9 1021.30   44.70
   2  -2   9 1069.49   44.90
  -2   2   9 1075.79   44.20
   2   2   9 1049.79   45.10
  -2   2  -9 1054.79   44.20
  -2   2  -9 1045.40   45.70
  -2   2  -9 1026.50   45.60
  -2  -2   9 1131.09   43.70
   2   2   9 1034.40   45.60
   2   2   9 1039.30   45.00
   2  -2  -9 1126.49   44.20
   2  -2  -9 1166.18   43.60
  -2  -2   9 1142.59   43.60
   2  -2  -9 1178.08   43.20
   3  -2   9   90.29    6.80
  -3  -2  -9   81.19    6.40
  -3  -2  -9   86.69    7.10
  -3   2   9   90.19    6.00
  -3   2   9   81.79    6.00
   3   2  -9   79.79    4.20
  -3   2   9   85.79    5.20
  -3   2  -9   87.29    7.20
   3  -2  -9   93.19    5.30
  -3  -2   9   81.99    5.20
   3  -2  -9   88.69    5.20
  -3  -2   9   89.39    5.70
  -3  -2   9   82.79    5.70
   3   2   9   83.29    6.80
  -3   2  -9   75.39    7.70
   3   2   9   85.19    6.80
   3   2   9   78.39    7.60
  -4   2   9   20.50    3.80
  -4  -2  -9   22.40    4.30
   4  -2   9   36.50    5.30
  -4  -2  -9   23.00    4.30
  -4   2   9   25.70    4.10
   4   2  -9   31.20    3.20
   4  -2   9   27.20    4.70
  -4   2   9   27.50    2.50
   4  -2  -9   28.60    3.60
  -4  -2   9   28.60    4.00
  -4  -2   9   24.40    3.90
   4   2   9   31.40    4.90
  -4   2  -9   18.30    3.80
   4   2   9   22.80    4.50
  -4   2  -9   26.20    4.80
  -4   2  -9   21.10    4.60
   4   2   9   31.70    5.00
  -4  -2   9   27.60    2.70
   5  -2   9   16.80    4.50
  -5  -2  -9   20.30    4.80
   5  -2   9   15.00    4.00
  -5   2   9   22.80    4.30
  -5  -2  -9   17.00    4.20
  -5   2   9   22.30    4.40
  -5  -2   9   14.40    3.60
   5   2   9   19.90    4.30
  -5   2  -9   21.40    4.50
  -5   2  -9   21.10    5.00
  -5   2  -9   20.50    5.00
  -5  -2   9   18.60    1.20
   5   2   9   12.30    4.00
  -5  -2   9   16.50    3.60
   5   2   9   23.20    5.10
   6  -2   9  169.28   12.50
  -6  -2  -9  167.48   12.70
  -6   2   9  156.28   11.40
   6   2   9  179.98   11.70
  -6   2  -9  165.78   12.50
  -6  -2   9  166.98   10.40
   6   2   9  146.89   12.10
  -6  -2   9  154.28   11.20
  -6   2  -9  135.99   11.90
  -7  -2  -9  296.67   19.80
  -7   2   9  293.57   18.70
   7  -2   9  326.57   18.20
   7  -2   9  313.87   19.90
   7   2   9  350.16   18.80
  -7   2  -9  332.97   20.50
  -7   2  -9  316.67   19.80
  -7  -2   9  357.16   19.60
  -7  -2   9  321.17   17.50
   7   2   9  310.97   19.90
   8  -2   9    1.10    3.10
  -8  -2  -9    3.30    4.50
   8  -2   9    3.00    3.60
  -8   2   9    4.60    4.20
  -8   2  -9   10.10    4.60
   8   2   9   -1.20    4.30
  -8  -2   9   -1.60    3.20
   8   2   9   -1.00    3.00
  -8   2  -9   -3.50    4.20
   0  -3  -9  607.64   25.20
   0   3   9  590.54   26.30
   0  -3   9  553.74   25.10
   0  -3  -9  594.04   25.00
   0   3  -9  574.34   26.90
   0   3  -9  595.74   24.20
   0  -3   9  607.34   25.30
   0   3   9  583.14   25.80
   0   3   9  581.34   25.70
   0  -3  -9  623.24   27.70
   1   3  -9   17.00    3.40
  -1  -3  -9   17.60    1.30
   1   3  -9   17.90    1.80
   1  -3   9   14.70    2.70
  -1  -3  -9   22.00    3.20
   1   3  -9   16.70    1.80
  -1   3   9   19.30    1.90
   1  -3   9   21.10    3.20
  -1   3   9   23.30    3.30
  -1  -3  -9   16.50    2.90
  -1   3   9   14.40    2.90
  -1   3   9   16.50    3.00
   1  -3  -9   15.30    2.00
   1   3   9   15.30    3.10
   1   3   9   10.00    2.60
  -1  -3   9   13.70    2.40
  -1   3  -9   10.10    3.10
   1  -3  -9   13.20    2.30
   1   3   9   10.30    2.70
  -1  -3   9   15.80    2.50
   1  -3  -9   16.20    3.10
  -1   3  -9   15.10    2.40
  -2  -3  -9  183.48    9.00
  -2   3   9  194.58   10.30
  -2   3   9  176.88    9.90
  -2  -3  -9  161.48   10.40
  -2   3   9  197.68   10.40
   2  -3   9  188.38   10.50
  -2   3   9  190.38    9.40
   2  -3   9  170.08   10.40
   2   3  -9  174.18    8.30
   2  -3  -9  191.28    8.00
   2   3   9  209.88   11.20
   2  -3  -9  195.78   10.00
   2  -3  -9  188.08    9.60
  -2  -3   9  196.98    9.70
  -2   3  -9  192.98   11.50
   2   3   9  161.08   10.80
  -2  -3   9  193.78    9.90
  -2   3  -9  193.08   10.00
  -2   3  -9  182.98   11.50
   2   3   9  172.28   10.70
   3   3  -9  546.65   22.60
  -3   3   9  554.14   24.70
  -3  -3  -9  562.84   25.30
  -3   3   9  588.04   25.00
   3  -3   9  563.84   25.50
   3  -3   9  535.35   25.30
  -3   3   9  545.05   23.50
  -3  -3  -9  533.55   25.60
   3   3   9  511.55   25.40
   3  -3  -9  531.95   23.40
  -3  -3   9  507.95   23.80
  -3   3  -9  506.35   25.70
   3   3   9  585.64   26.00
  -3  -3   9  561.84   23.70
  -3  -3   9  531.75   24.00
  -3   3  -9  458.75   25.50
   3  -3  -9  572.54   23.80
   3   3   9  549.35   25.60
  -4   3   9  958.30   41.10
  -4  -3  -9  917.71   42.10
  -4   3   9  991.20   41.30
   4  -3   9  998.90   42.20
  -4   3   9  952.90   38.70
  -4  -3  -9  938.71   41.70
   4   3  -9 1008.00   39.10
  -4   3  -9  955.90   41.30
  -4  -3   9  973.90   40.50
   4  -3  -9  955.30   38.70
  -4  -3   9  882.31   40.40
   4  -3  -9  960.30   39.90
   4   3   9  860.41   41.70
  -4   3  -9  863.81   42.20
   4   3   9  994.30   42.40
  -4   3  -9  955.50   42.50
   4   3   9  963.00   41.80
  -4  -3   9  928.01   38.80
  -5  -3  -9   10.50    4.30
   5  -3   9   21.30    4.90
  -5  -3  -9   18.50    4.50
  -5   3   9    8.70    3.50
   5   3   9   14.80    3.80
  -5   3  -9   11.40    4.50
  -5  -3   9   12.20    3.60
  -5   3  -9   12.90    4.40
   5   3   9    8.20    3.70
  -6  -3  -9  225.18   15.30
   6  -3   9  214.28   15.20
  -6   3   9  219.28   14.70
  -6   3  -9  236.28   16.20
  -6  -3   9  231.48   14.50
   6   3   9  232.08   14.50
  -6  -3   9  255.97   14.30
  -6   3  -9  224.18   15.20
   6   3   9  226.18   15.60
  -7  -3  -9   43.50    8.10
   7  -3   9   60.49    8.80
  -7   3   9   55.19    8.20
  -7  -3   9   62.89    7.70
  -7  -3   9   57.49    8.20
  -7   3  -9   57.09    9.30
   7   3   9   64.59    9.40
   7   3   9   77.89    8.60
  -7   3  -9   60.49    9.10
   0   4   9  423.06   20.00
   0   4   9  432.46   20.00
   0  -4   9  425.86   19.40
   0  -4  -9  422.66   19.40
   0   4  -9  420.56   21.20
   0   4   9  399.96   20.10
   0  -4   9  392.26   19.30
   0   4  -9  420.66   18.50
  -1   4   9   86.29    6.70
  -1  -4  -9   86.29    4.80
   1  -4   9   79.69    6.60
  -1   4   9   99.99    5.30
   1  -4   9   96.49    6.90
  -1   4   9   85.89    6.70
   1   4  -9   89.79    7.80
   1   4  -9   88.79    5.40
  -1  -4  -9   90.19    6.60
  -1   4   9   91.59    6.90
  -1  -4   9   83.39    6.30
   1  -4  -9   86.89    6.20
   1   4   9   84.49    6.90
   1   4   9   87.39    6.90
  -1   4  -9   92.29    6.20
   1   4   9   85.79    7.00
  -1   4  -9   83.99    8.40
  -1  -4   9   91.99    6.40
  -2  -4  -9   62.69    6.60
  -2   4   9   66.19    6.60
   2  -4   9   60.19    6.50
  -2   4   9   61.19    4.90
  -2   4   9   69.19    6.30
  -2  -4  -9   71.99    4.80
  -2  -4  -9   59.59    6.30
   2  -4   9   72.19    7.00
  -2   4   9   61.09    6.30
   2   4  -9   70.89    4.80
  -2  -4   9   70.19    5.60
   2   4   9   56.49    6.50
   2  -4  -9   78.79    5.70
   2   4   9   59.09    6.70
  -2  -4   9   65.19    5.60
  -2   4  -9   64.49    7.60
   2   4   9   69.59    7.20
  -2   4  -9   87.99    6.00
   2  -4  -9   75.69    4.50
  -3   4   9  529.35   24.30
   3  -4   9  477.45   24.20
  -3  -4  -9  527.85   24.60
  -3   4   9  494.55   24.00
  -3   4   9  492.35   22.80
  -3  -4  -9  517.35   22.80
   3  -4   9  536.35   24.80
  -3   4   9  519.55   23.30
   3   4  -9  505.85   22.00
  -3  -4  -9  480.25   24.30
   3   4   9  485.15   24.60
   3   4   9  490.45   24.70
   3  -4  -9  493.05   20.80
  -3   4  -9  525.95   25.40
  -3   4  -9  484.25   23.60
   3  -4  -9  505.85   22.80
  -3  -4   9  501.35   23.40
  -3   4  -9  507.05   25.50
  -3  -4   9  495.95   23.20
   3  -4  -9  509.25   23.10
   3   4   9  528.75   25.00
  -3  -4   9  541.55   24.50
   4  -4   9  303.57   17.40
   4  -4   9  301.07   17.20
  -4   4   9  292.57   16.50
  -4  -4  -9  315.87   17.50
  -4   4   9  313.67   18.20
  -4   4   9  306.37   16.30
  -4   4   9  301.47   14.60
  -4  -4  -9  297.67   16.90
  -4   4  -9  275.57   17.70
  -4   4  -9  284.87   16.30
  -4  -4   9  275.87   15.80
   4   4   9  276.07   17.10
   4   4   9  302.87   17.10
  -4  -4   9  316.07   14.90
  -4  -4   9  300.87   16.00
  -4   4  -9  315.17   17.80
   4   4   9  322.47   17.70
  -5  -4  -9  361.06   20.30
   5  -4   9  359.96   20.10
  -5   4   9  337.87   19.10
  -5   4   9  327.07   19.00
   5   4   9  339.87   19.20
  -5   4  -9  363.26   20.30
  -5  -4   9  350.26   18.80
  -5   4  -9  348.87   20.80
   5   4   9  366.96   20.40
   6  -4   9  349.57   20.70
  -6   4   9  340.67   20.10
  -6  -4  -9  334.17   20.60
  -6   4   9  375.26   20.50
  -6   4  -9  345.47   20.80
  -6   4  -9  339.87   21.40
  -6  -4   9  351.06   19.80
   6   4   9  346.47   20.80
   6   4   9  318.77   19.20
   7  -4   9  177.28   14.50
  -7   4   9  197.28   14.40
  -7   4   9  170.98   14.00
  -7  -4  -9  164.48   13.60
  -7   4  -9  171.38   15.10
  -7   4  -9  179.08   14.50
   7   4   9  184.18   13.20
  -7  -4   9  173.18   13.50
  -7  -4   9  160.28   12.20
   7   4   9  160.48   14.00
   0  -5  -9   25.10    2.90
   0  -5   9   26.80    4.20
   0   5   9   25.80    4.70
   0   5   9   19.00    2.60
   0   5   9   28.10    4.70
   0   5  -9   21.90    3.50
   0  -5  -9   24.70    4.30
   0   5  -9   21.90    4.80
   0   5   9   25.90    4.60
   0  -5   9   27.50    4.30
   1   5  -9   41.20    4.50
   1   5  -9   51.29    6.90
  -1  -5  -9   51.99    6.00
   1  -5   9   43.60    5.70
   1  -5   9   46.20    5.70
  -1   5   9   52.29    6.40
  -1   5   9   48.60    4.60
  -1  -5  -9   49.40    4.00
  -1   5   9   57.49    6.30
  -1   5   9   55.89    6.40
  -1  -5   9   47.10    5.50
   1   5   9   52.29    6.50
  -1   5  -9   43.20    6.50
  -1  -5   9   66.59    6.40
  -1   5  -9   51.79    5.40
   1   5   9   61.79    6.90
   1   5   9   60.19    6.70
  -2   5   9   55.89    6.60
  -2   5   9   52.09    5.90
  -2  -5  -9   55.99    4.40
   2  -5   9   52.99    6.50
  -2  -5  -9   36.10    5.50
   2   5  -9   41.40    4.60
  -2   5   9   44.60    6.00
  -2  -5  -9   54.09    6.30
  -2   5   9   52.99    5.20
   2   5  -9   48.70    7.10
   2  -5   9   51.49    6.20
   2  -5  -9   52.39    5.90
   2   5   9   45.70    6.40
  -2   5  -9   25.10    5.50
  -2  -5   9   49.60    5.70
  -2  -5   9   44.60    5.50
   2   5   9   52.39    6.70
   2   5   9   35.90    6.00
   2  -5  -9   49.10    4.60
  -3   5   9  276.27   15.00
  -3   5   9  293.77   19.40
  -3   5   9  286.57   16.30
  -3   5   9  274.57   15.00
  -3  -5  -9  307.47   15.90
  -3  -5  -9  284.07   16.40
   3  -5   9  282.57   16.50
  -3  -5  -9  243.78   15.80
   3  -5   9  286.97   17.70
   3   5   9  312.97   17.30
  -3  -5   9  302.27   15.80
   3   5   9  294.27   16.90
  -3   5  -9  282.07   17.30
  -3   5  -9  288.67   17.60
  -3  -5   9  311.97   15.90
   3   5   9  285.47   16.70
  -4   5   9  212.38   12.80
   4  -5   9  217.78   14.00
  -4   5   9  198.18   13.30
  -4   5   9  206.38   11.70
  -4  -5  -9  197.08   13.50
  -4   5  -9  207.08   13.90
  -4   5  -9  183.28   14.00
  -4  -5   9  209.78   13.20
   4   5   9  193.58   13.80
   4   5   9  215.88   13.50
   5  -5   9   37.50    6.70
  -5  -5  -9   34.60    6.40
  -5   5   9   45.80    7.20
  -5   5   9   46.10    6.90
  -5   5  -9   48.20    8.40
   5   5   9   43.00    6.80
  -5   5  -9   45.30    7.30
   5   5   9   40.30    7.40
  -5  -5   9   37.60    6.20
  -6   5   9   48.50    7.90
  -6  -5  -9   56.79    9.00
   6  -5   9   67.59    9.20
  -6   5   9   51.29    8.20
   6   5   9   68.59    9.80
  -6  -5   9   47.80    7.70
   6   5   9   55.69    8.20
  -6   5  -9   42.80    8.50
  -6   5  -9   49.80    8.30
   7  -5   9  120.49   13.40
  -7   5   9  140.59   14.00
  -7   5   9  129.59   13.90
  -7  -5  -9  115.19   13.50
  -7  -5   9  130.69   15.10
  -7   5  -9  123.09   13.60
   7   5   9  143.49   13.30
  -7  -5   9  136.99   12.90
  -7   5  -9  129.59   15.00
   0   6   9  130.39   10.00
   0  -6  -9  126.29    9.20
   0   6  -9   96.99   10.60
   0   6   9  110.79    9.00
   0  -6   9  112.69    9.00
   0   6   9  137.99   10.30
   0  -6   9  119.19    9.20
   0   6   9  133.09    7.60
  -1   6   9   18.50    4.50
   1  -6   9   27.20    5.00
  -1  -6  -9   22.90    4.60
  -1   6   9   28.10    8.30
  -1   6   9   23.60    3.70
   1   6  -9   24.30    5.50
  -1   6   9   21.40    4.70
  -1  -6   9   28.70    5.50
  -1   6  -9   10.60    4.50
   1   6   9   25.00    5.50
   1   6   9   28.40    5.50
   1   6   9   19.60    4.50
  -1  -6   9   17.20    4.20
  -2   6   9  215.28   13.70
  -2  -6  -9  210.38   15.00
   2  -6   9  198.78   13.30
  -2   6   9  221.48   12.00
   2   6  -9  199.98   14.20
  -2   6   9  184.18   12.50
   2   6   9  219.88   14.00
  -2  -6   9  200.08   12.90
   2   6   9  221.18   14.00
  -2   6  -9  228.48   15.10
  -3   6   9  151.38   11.30
  -3  -6  -9  136.99   10.90
  -3   6   9  131.39    9.70
  -3   6   9  141.99    9.90
   3  -6   9  135.59   10.90
   3   6   9  153.98   11.30
  -3   6  -9  127.59   13.00
   3   6   9  147.69   11.40
  -3  -6   9  140.59   10.40
  -4   6   9   37.10    5.80
  -4   6   9   28.80    6.00
   4  -6   9   41.10    6.80
  -4  -6  -9   48.20    7.30
   4   6   9   22.60    5.90
  -4   6  -9   32.00    6.70
  -4  -6   9   29.70    5.60
   4   6   9   30.50    5.90
  -5   6   9   40.50    7.20
  -5   6   9   35.70    6.50
  -5  -6  -9   30.10    6.60
   5  -6   9   25.60    6.40
   5   6   9   32.90    6.50
   5   6   9   26.00    6.40
  -5  -6   9   34.70    6.60
  -5   6  -9   33.80    7.00
  -6   6   9   16.00    5.50
  -6  -6  -9   14.50    5.50
  -6   6   9   32.10    7.10
   6   6   9   27.50    6.60
  -6   6  -9    9.20    5.80
   6   6   9   23.80    6.80
  -6  -6   9   21.10    5.70
   0  -7   9  541.45   27.40
   0   7   9  587.24   28.50
   0   7   9  560.34   27.80
   0   7  -9  569.84   29.30
   0   7   9  526.25   24.90
   1  -7   9  718.13   33.40
   1   7  -9  606.74   34.00
  -1   7   9  686.33   33.00
  -1   7   9  676.13   33.40
  -1   7   9  724.13   30.80
   1   7   9  741.83   33.90
  -1  -7   9  680.63   32.90
  -1   7  -9  676.53   34.60
   1   7   9  713.63   33.80
   2  -7   9  687.13   34.10
  -2   7   9  696.73   32.00
   2   7  -9  680.73   35.50
  -2   7   9  715.33   33.60
  -2   7   9  717.13   34.40
   2   7   9  746.13   34.80
   2   7   9  739.33   35.00
  -2  -7   9  715.03   33.80
  -2   7  -9  723.43   35.90
  -3   7   9  349.17   19.50
  -3   7   9  311.67   17.10
  -3   7   9  319.37   17.70
   3  -7   9  281.37   18.30
  -3   7  -9  283.37   19.30
   3   7   9  286.37   18.20
  -3  -7   9  310.77   18.20
   3   7   9  326.77   19.50
  -4  -7  -9   28.00    6.30
   4  -7   9   32.10    6.70
  -4   7   9   38.80    6.50
  -4   7   9   40.90    7.30
   4   7   9   40.40    7.80
  -4   7  -9   27.90    6.50
   4   7   9   40.70    7.40
  -4  -7   9   31.60    6.30
   5  -7   9   42.50    7.90
  -5  -7  -9   32.70    7.20
  -5   7   9   34.70    7.60
  -5   7   9   31.60    6.60
   5   7   9   34.40    7.30
  -5  -7   9   41.50    7.30
  -5   7  -9   32.00    8.00
   5   7   9   50.69    8.90
   0   8   9    8.00    3.80
   0  -8   9    2.40    3.80
   0   8   9    3.70    4.00
   0   8  -9    4.40    4.10
   1   8  -9   -1.80    2.60
   1  -8   9    2.80    3.40
  -1   8   9   -4.10    3.20
  -1   8   9    0.80    3.60
  -1  -8   9   -3.50    2.60
   1   8   9    1.80    3.80
   1   8   9    7.50    4.30
  -1   8  -9    5.70    4.70
   2   8  -9  109.19   13.20
  -2   8   9  119.79   11.60
   2  -8   9  127.09   12.50
  -2   8   9  110.79   12.30
   2   8   9  109.29   12.00
   2   8   9  128.89   13.00
  -2   8  -9  117.99   12.90
  -2  -8   9  127.19   12.20
  -3   8   9   15.70    5.10
  -3   8   9   16.80    5.40
   3  -8   9   19.80    5.90
   3   8   9   11.60    5.40
  -3   8  -9   10.60    5.80
   3   8   9    9.80    4.90
  -3  -8   9   11.20    4.50
  -4  -8  -9  134.49   13.60
   4  -8   9  132.59   13.70
  -4   8   9  114.19   12.90
  -4   8  -9  137.49   15.20
   4   8   9  130.69   14.10
  -4  -8   9  135.39   13.40
   4   8   9  123.19   13.50
   0   9   9   60.19    9.40
   0   9   9   86.69   10.70
   0  -9   9   60.39    9.20
   0   9  -9   77.99   10.90
  -1   9   9   76.39   10.30
   1  -9   9   74.79   10.10
   1   9  -9   94.29   12.50
  -1   9   9   75.79   10.60
  -1  -9   9   77.59   10.30
  -1   9  -9   81.29   11.70
   1   9   9   89.19   11.30
   1   9   9   72.59   10.20
   2  -9   9    9.20    4.90
  -2   9   9   16.50    5.80
  -2   9   9   10.60    4.90
  -2   9  -9    2.40    5.10
  -2  -9   9    9.30    4.90
   2   9   9    7.80    6.00
   2   9   9   15.00    6.10
   0   0  10   39.00    3.70
   0   0 -10   36.70    3.10
   0   0  10   32.50    2.30
   0   0  10   35.10    3.00
   0   0  10   30.90    4.00
   0   0 -10   42.50    3.50
   0   0  10   33.80    2.30
   1   0  10 2320.37   97.19
  -1   0  10 2537.95   95.99
   1   0  10 2557.74   96.89
  -1   0 -10 2454.75   94.49
   1   0  10 2496.15   95.79
  -1   0 -10 2579.34   94.49
  -1   0  10 2394.26   93.99
  -1   0 -10 2430.36   96.69
  -1   0  10 2390.66   93.89
   1   0  10 2382.16   95.69
  -1   0  10 2371.86   96.39
  -1   0  10 2511.75   95.29
   1   0  10 2379.26   95.59
  -1   0 -10 2396.26   95.69
  -2   0 -10 4005.40  161.28
  -2   0 -10 4304.77  160.98
  -2   0  10 4101.69  159.58
   2   0  10 4139.59  161.68
  -2   0 -10 4084.89  162.48
  -2   0  10 4421.56  161.88
  -2   0  10 4037.10  159.68
   2   0  10 4100.39  161.58
  -2   0  10 4193.08  160.88
   2   0  10 4107.29  162.68
  -2   0  10 4016.30  159.68
   3   0  10  321.47   15.50
  -3   0 -10  293.77   15.80
  -3   0  10  295.07   12.50
  -3   0  10  294.67   13.70
  -3   0  10  329.97   13.90
   3   0  10  292.77   15.60
   3   0  10  281.47   15.10
  -3   0 -10  300.27   15.10
  -3   0  10  306.87   13.10
  -3   0 -10  274.27   14.50
  -4   0 -10   -1.20    2.00
   4   0  10   11.20    3.40
  -4   0 -10    1.10    1.80
  -4   0  10   -0.20    0.40
  -4   0 -10    6.50    3.10
   4   0  10    0.80    2.30
   4   0  10    1.20    2.40
  -4   0  10   -0.20    1.50
  -4   0  10   -1.30    1.40
  -4   0  10    3.10    1.20
   4   0 -10    0.30    0.90
   5   0  10    4.50    2.50
   5   0  10    6.10    3.30
  -5   0  10    0.70    1.40
   5   0  10   -1.40    2.50
   5   0 -10   -0.90    2.10
  -5   0  10    1.00    2.00
  -5   0 -10    5.10    3.40
  -5   0 -10    1.00    2.50
  -5   0 -10    1.00    2.60
  -6   0  10   51.09    6.60
   6   0  10   57.09    7.20
  -6   0  10   58.79    5.40
  -6   0 -10   61.09    8.00
  -6   0 -10   47.10    7.70
   6   0  10   45.70    7.20
   7   0  10   11.90    4.90
  -7   0  10    8.50    4.10
  -7   0 -10    9.50    4.70
   7   0  10    1.70    3.00
  -7   0 -10    6.00    3.80
  -8   0  10  522.25   28.20
   8   0  10  518.75   27.10
  -8   0 -10  502.95   29.10
   8   0  10  596.14   30.50
  -8   0 -10  523.05   29.50
   0  -1  10    6.30    1.90
   0   1 -10    6.40    2.00
   0  -1  10    6.40    1.20
   0  -1 -10    6.20    1.60
   0   1 -10    5.90    1.90
   0  -1  10    6.60    1.20
   0   1  10    9.30    1.10
   0  -1  10    8.40    2.20
   0   1  10   12.10    2.00
   0   1  10   10.00    1.60
   0   1  10    7.60    2.30
   0   1  10    7.20    1.50
  -1  -1 -10 1056.49   41.50
   1  -1  10 1025.70   42.10
  -1   1  10  982.70   42.70
  -1   1  10 1027.90   41.40
   1  -1  10 1063.79   43.50
  -1  -1 -10 1094.29   41.60
  -1  -1 -10 1007.30   41.20
  -1   1  10 1038.70   41.30
  -1   1  10 1049.59   41.50
   1  -1  10 1004.20   42.90
  -1  -1 -10  988.80   42.80
   1  -1  10  989.90   42.00
   1   1  10 1036.70   42.40
   1   1  10 1068.29   42.40
  -1   1 -10 1089.29   40.90
  -1   1 -10  992.60   43.30
   1   1  10 1115.99   43.20
  -1  -1  10 1082.29   40.60
   1   1  10 1041.60   43.80
  -1   1 -10 1074.19   40.90
  -1   1 -10 1048.20   42.90
  -1  -1  10 1117.59   42.40
  -1  -1  10 1090.79   43.20
   1  -1 -10 1008.70   41.00
  -1  -1  10 1016.60   40.50
  -2   1  10  853.21   33.60
   2  -1  10  803.12   34.90
   2  -1  10  827.02   34.90
  -2  -1 -10  844.02   34.10
  -2  -1 -10  809.72   35.50
  -2   1  10  823.72   34.20
  -2   1  10  860.61   33.70
  -2  -1 -10  857.41   34.50
  -2   1 -10  760.32   35.60
  -2  -1  10  842.72   33.10
  -2   1 -10  825.72   35.30
  -2   1 -10  839.02   34.20
   2   1  10  795.62   34.90
  -2  -1  10  888.21   35.60
   2   1  10  834.92   35.00
  -2  -1  10  860.41   33.90
  -2  -1  10  780.02   33.00
   2   1  10  830.22   36.10
  -3  -1 -10   84.59    6.80
  -3   1  10  101.79    5.90
   3  -1  10   88.39    6.60
  -3  -1 -10   72.79    5.90
   3  -1  10   81.59    6.50
  -3  -1 -10   86.39    6.10
  -3   1  10   82.29    4.90
  -3   1  10   85.69    5.60
  -3  -1  10   82.79    5.30
   3   1  10   83.69    6.60
   3   1  10   88.29    6.70
  -3   1 -10   87.99    6.20
   3   1  10   93.09    7.30
  -3  -1  10   90.49    5.50
  -3   1 -10   77.39    6.60
  -3   1 -10   81.39    7.90
  -4  -1 -10  107.09    7.90
  -4   1  10  117.79    7.50
   4  -1  10  102.69    8.20
  -4   1  10  107.69    4.90
   4   1 -10  110.49    5.20
  -4  -1 -10  117.09    8.90
  -4   1  10  119.39    7.50
   4  -1  10  102.79    8.20
   4   1  10  109.59    8.40
  -4  -1  10  101.09    7.10
  -4  -1  10  101.29    5.10
  -4   1 -10  117.49    8.60
   4   1  10  105.29    8.30
  -4  -1  10  102.09    5.10
   4  -1 -10  107.59    5.80
  -4   1 -10   94.39    7.50
  -4  -1  10  100.49    6.90
  -4   1 -10   87.19    8.90
   4   1  10  117.99    8.40
   5  -1  10  152.58   11.30
  -5   1  10  162.28    7.40
   5  -1  10  165.18   11.80
  -5   1  10  157.58   10.40
   5  -1  10  170.28   11.20
  -5  -1 -10  183.18   11.40
  -5  -1 -10  153.08   11.60
  -5   1  10  174.58   10.60
  -5   1 -10  149.59   10.60
  -5  -1  10  166.18    9.10
   5   1  10  163.98   11.10
  -5  -1  10  152.58   10.10
  -5   1 -10  124.99   10.90
  -5  -1  10  152.78    9.90
  -5   1 -10  146.19   11.20
   5   1  10  156.28   11.40
   5   1  10  179.08   12.00
  -6  -1 -10  258.07   16.30
  -6   1  10  252.17   15.20
   6  -1  10  254.37   16.30
   6  -1  10  237.58   15.00
   6   1  10  260.07   15.40
   6   1  10  246.88   16.20
  -6   1 -10  241.88   16.30
  -6   1 -10  260.27   16.60
  -6  -1  10  253.97   13.40
  -6  -1  10  290.47   15.50
   7  -1  10  164.28   11.60
  -7   1  10  134.59   11.30
  -7  -1 -10  148.19   14.30
   7  -1  10  140.69   13.80
   7   1  10  152.98   12.40
  -7   1 -10  147.49   12.70
  -7  -1  10  160.58   11.80
   7   1  10  142.59   11.20
  -7   1 -10  163.18   13.20
   8  -1  10   94.59   10.10
  -8   1  10   79.89   10.20
  -8  -1 -10   89.29   11.60
   8  -1  10   86.89   11.50
  -8   1 -10   80.79   11.20
   8   1  10   91.79   10.10
  -8   1 -10   82.59   11.00
   8   1  10   81.29   11.30
  -8  -1  10  119.99   13.80
   0  -2  10   18.10    3.20
   0  -2 -10   17.30    1.90
   0   2 -10   12.40    2.90
   0   2  10   19.20    2.70
   0  -2 -10   17.60    3.10
   0   2  10   11.80    2.80
   0  -2  10   15.40    3.20
   0   2  10   11.90    2.20
   0  -2  10   17.00    2.20
   0  -2  10   19.50    2.30
   0  -2 -10   17.70    1.90
   0  -2 -10   13.50    2.20
   1  -2  10   16.50    3.20
  -1  -2 -10   17.10    2.50
  -1   2  10   16.20    1.50
  -1   2  10   16.90    2.90
   1   2 -10   12.90    3.00
   1  -2  10   16.90    2.50
  -1   2  10   16.40    2.40
   1  -2  10   16.60    2.50
  -1   2  10   12.30    2.10
  -1  -2 -10   13.20    2.60
  -1  -2  10   12.60    1.70
  -1   2 -10   13.40    1.80
  -1   2 -10   16.40    3.30
  -1  -2  10   11.80    1.80
  -1  -2  10   19.80    3.40
  -1   2 -10   15.80    1.90
   1  -2 -10   17.40    1.80
   1  -2 -10   15.00    2.80
  -1  -2  10   17.20    2.90
   1   2  10   14.40    3.30
   1   2  10   16.30    2.70
   1  -2 -10   15.50    1.40
   1   2  10   16.30    2.80
  -1   2 -10   16.00    3.30
   2  -2  10   66.99    5.40
  -2   2  10   58.99    4.70
   2  -2  10   66.99    5.40
  -2   2  10   62.59    4.80
  -2  -2 -10   67.99    5.20
  -2   2  10   67.69    4.80
  -2  -2 -10   68.19    4.20
  -2  -2 -10   57.79    6.00
  -2   2 -10   61.89    6.40
   2  -2 -10   71.89    3.60
   2   2  10   63.79    5.40
  -2   2 -10   67.99    4.80
   2   2  10   62.69    6.50
   2   2  10   69.89    5.70
  -2  -2  10   63.59    4.20
   2  -2 -10   76.19    5.10
  -2   2 -10   69.89    6.80
  -2  -2  10   61.09    4.20
  -3   2  10  128.99    7.90
   3  -2  10  127.39    8.70
  -3   2  10  123.59    7.10
   3  -2  10  121.89    8.60
  -3   2  10  122.39    7.80
  -3  -2 -10  131.59    9.20
   3  -2 -10  139.69    6.80
   3   2  10  139.99    9.10
  -3   2 -10  140.99    9.50
  -3   2 -10  149.99    8.50
  -3   2 -10  125.39    9.30
   3   2  10  152.48    9.70
  -3  -2  10  138.89    7.60
   3   2  10  129.29    8.90
  -3  -2  10  127.29    7.60
  -4  -2 -10  180.98   11.20
   4   2 -10  175.48    8.30
   4  -2  10  185.68   11.70
  -4  -2 -10  175.78   11.80
  -4   2  10  164.28   10.40
   4  -2  10  169.28   11.30
  -4   2  10  190.88    8.50
  -4   2  10  178.88   10.60
  -4  -2  10  178.18   10.20
  -4   2 -10  185.28   11.00
  -4   2 -10  160.38   11.50
   4  -2 -10  183.98    9.30
   4   2  10  185.98   11.80
   4   2  10  177.68   11.60
  -4  -2  10  194.18    8.70
   4   2  10  190.48   11.90
  -4   2 -10  146.79   11.30
  -4  -2  10  176.28   10.30
  -5   2  10  482.25   24.10
  -5  -2 -10  478.75   25.60
   5  -2  10  486.55   25.30
  -5  -2 -10  515.05   25.50
   5   2  10  533.25   25.80
  -5   2 -10  510.85   25.90
   5   2  10  537.95   25.40
  -5  -2  10  496.15   24.40
  -5   2 -10  517.65   26.10
  -5  -2  10  500.85   24.10
   6  -2  10   19.00    5.10
  -6   2  10   12.50    4.00
  -6  -2 -10   15.20    4.60
   6   2  10   21.70    5.00
   6   2  10   11.70    4.50
  -6   2 -10   19.00    5.30
  -6  -2  10   23.60    4.10
  -6   2 -10   19.50    5.50
  -6  -2  10   18.60    4.50
   7  -2  10   51.39    7.60
  -7  -2 -10   59.29    8.90
   7  -2  10   54.59    8.60
  -7   2  10   50.09    7.50
   7   2  10   69.39    8.60
   7   2  10   65.69    9.30
  -7  -2  10   47.00    7.60
  -7   2 -10   57.09    8.60
  -7   2 -10   66.89    9.30
   8  -2  10  104.49   12.40
   8  -2  10   84.99    9.50
  -8  -2 -10   87.09   11.60
   8   2  10   79.29    9.50
  -8   2 -10   85.69   12.00
   8   2  10   76.79   11.00
  -8   2 -10   91.89   11.90
   0   3  10   30.50    3.90
   0  -3 -10   34.40    3.70
   0   3  10   31.90    4.40
   0   3 -10   30.50    4.60
   0   3 -10   33.20    2.40
   0   3  10   28.30    3.80
   0  -3  10   31.40    3.60
   0  -3  10   30.10    3.40
   0  -3 -10   38.40    3.80
  -1  -3 -10  463.15   21.20
  -1   3  10  479.35   21.50
  -1   3  10  444.06   21.00
   1   3 -10  450.85   22.30
  -1   3  10  487.35   18.80
  -1  -3 -10  461.95   20.80
   1  -3  10  499.35   21.20
   1  -3  10  436.46   20.80
  -1   3  10  445.16   21.00
  -1  -3  10  453.05   20.30
   1  -3 -10  493.65   20.30
  -1  -3  10  472.15   20.30
  -1   3 -10  465.45   22.40
   1  -3 -10  536.75   22.00
  -1   3 -10  445.76   20.00
   1  -3 -10  486.65   19.60
   1   3  10  461.05   22.10
   1   3  10  454.65   21.30
   1   3  10  454.75   21.40
  -2  -3 -10  440.16   19.30
   2  -3  10  445.36   21.30
  -2  -3 -10  427.46   21.00
  -2   3  10  448.56   20.80
  -2   3  10  458.45   21.00
  -2  -3 -10  454.45   21.70
  -2   3  10  487.35   21.20
  -2   3  10  488.55   20.00
   2  -3  10  433.06   21.20
   2   3  10  451.85   21.80
  -2   3 -10  472.15   22.50
   2  -3 -10  462.55   19.90
   2   3  10  431.06   22.10
   2  -3 -10  482.55   18.10
   2   3  10  497.95   22.10
  -2  -3  10  454.95   20.20
  -2  -3  10  459.55   20.40
  -2   3 -10  450.45   22.50
  -2   3 -10  472.85   20.70
   2  -3 -10  482.05   21.00
   2  -3 -10  454.35   18.00
  -3  -3 -10  585.94   27.20
   3   3 -10  594.34   24.00
  -3   3  10  601.64   26.70
   3  -3  10  578.84   27.30
  -3  -3 -10  595.24   27.90
   3  -3  10  608.44   27.50
  -3   3  10  589.84   25.60
  -3   3  10  523.25   26.20
   3   3  10  633.34   28.00
  -3  -3  10  619.24   25.90
   3   3  10  607.64   27.90
  -3  -3  10  583.34   26.00
  -3   3 -10  586.24   28.20
   3  -3 -10  635.54   25.60
  -3   3 -10  585.24   26.60
   3  -3 -10  609.44   25.70
   3   3  10  612.14   28.10
  -3   3 -10  547.65   27.80
  -3  -3  10  589.34   25.90
  -4   3  10  199.58   12.20
  -4   3  10  199.78   10.10
   4  -3  10  181.28   12.50
  -4   3  10  197.78   12.00
  -4  -3 -10  180.78   12.20
   4  -3  10  187.28   12.60
  -4  -3 -10  203.38   13.20
   4   3 -10  202.08    9.90
  -4  -3  10  230.18   10.60
   4   3  10  200.98   13.00
   4  -3 -10  210.18   11.40
   4   3  10  219.78   13.10
   4   3  10  195.38   12.80
   4  -3 -10  212.78   10.20
  -4  -3  10  200.18   11.50
  -4   3 -10  203.28   13.60
  -4  -3  10  205.78   11.80
  -4   3 -10  216.88   12.50
  -4   3 -10  205.48   13.40
   5  -3  10   22.10    5.10
  -5  -3 -10   22.60    5.30
  -5   3  10   25.50    5.00
  -5   3 -10   27.50    5.70
   5   3  10   20.20    5.20
  -5   3 -10   26.20    5.80
   5   3  10   25.00    4.80
  -5  -3  10   23.50    4.60
   6  -3  10   29.60    6.10
  -6   3  10   33.50    5.90
  -6  -3 -10   24.50    6.00
  -6   3 -10   19.10    5.40
   6   3  10   25.60    6.00
   6   3  10   20.10    5.10
  -6  -3  10   18.20    4.60
  -6   3 -10   28.50    6.30
  -6  -3  10   25.20    4.80
  -7   3  10   55.19    8.20
  -7  -3 -10   67.39    9.60
   7  -3  10   62.79    9.20
   7   3  10   76.69   10.20
  -7  -3  10   59.49    7.60
  -7   3 -10   65.29    9.80
   7   3  10   53.19    7.80
  -7   3 -10   52.89    9.20
  -7  -3  10   56.99    8.30
   0  -4 -10  730.73   31.30
   0   4  10  723.33   32.60
   0  -4 -10  761.72   31.70
   0   4  10  761.82   32.70
   0  -4  10  709.83   31.60
   0   4 -10  736.83   33.60
   0   4  10  736.13   32.30
   0  -4  10  709.83   31.50
   0   4 -10  744.63   30.50
  -1   4  10   59.39    6.30
  -1   4  10   63.19    6.20
  -1  -4 -10   61.99    3.30
  -1  -4 -10   67.49    5.70
  -1  -4 -10   62.89    6.10
   1   4 -10   58.09    7.20
   1   4 -10   62.19    4.20
   1  -4  10   53.79    5.70
  -1   4  10   66.19    3.90
  -1   4  10   60.69    6.10
   1  -4  10   60.89    6.00
   1   4  10   61.19    6.60
  -1  -4  10   66.79    5.40
  -1  -4  10   60.09    5.20
   1   4  10   70.39    6.70
   1   4  10   71.09    6.90
  -1   4 -10   64.09    7.40
   1  -4 -10   69.09    5.20
  -1   4 -10   64.69    5.00
  -2   4  10 1150.88   50.89
  -2   4  10 1282.77   51.29
  -2  -4 -10 1210.48   51.09
   2   4 -10 1220.68   48.50
   2  -4  10 1177.68   51.19
  -2   4  10 1173.38   49.20
  -2  -4 -10 1211.18   51.29
   2  -4  10 1333.27   51.79
  -2  -4 -10 1216.98   48.70
  -2   4  10 1187.68   50.59
  -2  -4  10 1143.99   50.09
   2   4  10 1188.28   51.59
  -2  -4  10 1288.87   50.29
   2  -4 -10 1220.58   49.99
   2   4  10 1269.67   52.39
  -2   4 -10 1207.88   50.29
   2  -4 -10 1225.18   48.30
  -2   4 -10 1211.98   52.69
   2   4  10 1230.88   51.89
  -3  -4 -10  351.06   18.80
  -3   4  10  379.66   19.00
   3   4 -10  384.76   16.60
   3  -4  10  358.86   19.20
  -3   4  10  364.46   17.70
  -3   4  10  385.26   18.00
  -3   4  10  363.96   18.80
   3  -4  10  377.66   19.40
  -3  -4 -10  340.37   19.10
  -3  -4 -10  359.86   17.30
  -3   4 -10  360.76   19.90
   3  -4 -10  392.46   18.00
  -3   4 -10  375.26   20.30
   3  -4 -10  373.86   15.20
   3  -4 -10  404.56   19.30
   3   4  10  396.16   20.00
   3   4  10  395.96   20.10
  -3  -4  10  359.16   18.20
   3   4  10  347.07   19.50
  -3  -4  10  375.96   18.10
  -4   4  10  388.56   17.90
  -4   4  10  373.36   19.80
   4  -4  10  391.36   20.70
  -4  -4 -10  407.26   22.80
  -4  -4 -10  406.26   20.90
  -4   4  10  392.06   19.50
  -4  -4  10  398.56   18.20
  -4  -4  10  391.26   19.40
   4   4  10  330.57   20.30
  -4   4 -10  373.56   20.90
  -4   4 -10  374.96   21.40
   4   4  10  352.26   20.00
   5  -4  10   97.29   10.30
  -5   4  10   96.99    9.70
  -5  -4 -10  107.79   11.00
  -5   4  10  103.19    9.90
  -5   4 -10   85.19   10.50
   5   4  10   96.69   10.40
  -5   4 -10   74.29    9.70
   5   4  10   88.09    9.60
  -5  -4  10  101.09    8.40
  -6   4  10  192.28   13.30
  -6  -4 -10  164.28   13.50
  -6   4  10  171.28   12.80
   6  -4  10  172.78   13.00
   6   4  10  174.78   13.70
   6   4  10  158.38   12.50
  -6  -4  10  172.88   12.40
  -6   4 -10  144.09   14.50
  -6   4 -10  168.48   14.10
  -7   4  10   90.49   10.80
  -7  -4 -10   93.79   11.60
   7  -4  10   85.89   11.20
  -7   4  10   94.99   11.50
  -7   4 -10  114.29   13.60
   7   4  10  129.79   12.20
  -7  -4  10  124.49   12.30
   7   4  10  107.09   12.60
  -7   4 -10  130.49   13.80
  -7  -4  10   97.29   10.30
   0  -5  10   38.00    5.00
   0   5  10   33.40    5.30
   0   5  10   39.40    5.70
   0   5 -10   26.60    5.40
   0   5  10   29.70    4.90
   0  -5 -10   14.50    3.40
   0   5 -10   33.50    3.90
   0  -5  10   37.60    4.90
  -1  -5 -10  210.48    9.50
  -1   5  10  192.48    9.80
   1  -5  10  208.08   12.10
   1  -5  10  188.28   11.80
  -1   5  10  193.58   12.10
  -1   5  10  230.58   12.70
  -1  -5 -10  204.28   12.00
  -1   5  10  204.98   12.40
   1   5 -10  207.08   10.50
   1   5 -10  206.08   13.40
   1  -5 -10  196.08   11.50
   1   5  10  203.68   12.60
  -1  -5  10  200.68   11.60
   1   5  10  216.58   12.90
  -1   5 -10  196.58   11.10
   1   5  10  209.48   13.00
  -1   5 -10  171.38   12.50
  -1  -5  10  197.08   11.70
  -2  -5 -10  192.68    9.50
   2   5 -10  175.48   12.60
   2  -5  10  171.88   11.50
  -2  -5 -10  189.28   11.80
  -2   5  10  186.08   10.00
  -2   5  10  179.18   11.10
  -2  -5 -10  183.18   11.60
  -2   5  10  187.18   11.70
   2  -5  10  193.28   11.90
   2   5 -10  180.88   10.10
  -2   5  10  198.78   12.20
   2   5  10  186.28   12.30
  -2  -5  10  176.18   10.90
   2  -5 -10  171.28    9.30
  -2   5 -10  170.68   12.40
  -2   5 -10  172.58   11.70
   2   5  10  165.08   11.90
   2  -5 -10  198.18   12.50
   2   5  10  182.98   12.10
  -2  -5  10  172.58   10.80
  -3   5  10   29.90    4.80
  -3   5  10   44.60    6.30
   3  -5  10   26.80    5.10
  -3   5  10   30.60    4.60
  -3  -5 -10   23.20    5.00
  -3   5 -10   32.40    6.40
  -3  -5  10   31.70    5.00
   3   5  10   34.80    5.70
   3   5  10   35.90    5.90
  -4   5  10   18.20    4.90
   4  -5  10    6.60    3.70
  -4   5  10   16.80    4.20
  -4   5  10   15.80    3.60
  -4  -5 -10    9.60    4.00
  -4   5 -10    9.30    4.10
  -4  -5  10   13.50    4.00
  -4   5 -10   10.20    4.30
   4   5  10    7.30    4.00
   4   5  10   15.30    4.70
  -5   5  10  130.49   10.30
  -5   5  10  112.19   11.30
   5  -5  10  121.19   12.00
  -5  -5 -10  117.29   12.00
  -5   5 -10  119.29   12.40
  -5   5 -10  130.29   13.60
  -5  -5  10   97.59   10.10
   5   5  10  122.29   12.30
   5   5  10  126.69   11.70
   6  -5  10    7.00    4.40
  -6   5  10   10.70    4.40
  -6  -5 -10   11.40    5.10
  -6   5  10    5.10    4.00
   6   5  10    6.70    4.00
   6   5  10   14.80    5.40
  -6   5 -10    8.20    5.20
  -6  -5  10    7.70    4.30
  -6   5 -10    9.50    5.70
   0   6  10  121.59    9.80
   0   6 -10  129.09   10.50
   0  -6  10  124.79    9.30
   0   6  10  108.99    9.10
   1   6 -10   78.39    9.50
  -1   6  10   69.79    8.00
  -1   6  10   64.39    7.90
  -1   6  10   84.79    5.80
   1  -6  10   77.39    8.20
   1   6  10   78.79    8.80
  -1  -6  10   84.89    8.30
   1   6  10   82.49    8.90
  -1   6 -10   96.69   10.30
   2  -6  10   78.29    8.50
  -2   6  10   70.19    7.70
  -2   6  10   75.49    8.60
  -2   6  10   69.59    5.90
  -2  -6 -10   77.09    8.20
   2   6 -10   68.69    9.10
   2   6  10   70.99    8.40
  -2  -6  10   66.69    7.60
  -2   6 -10   68.29    9.30
   2   6  10   70.09    8.50
  -3   6  10  345.57   17.30
  -3  -6 -10  321.17   18.80
  -3   6  10  352.66   18.00
  -3   6  10  349.87   19.30
   3  -6  10  338.47   19.20
   3   6  10  322.27   19.10
  -3  -6  10  314.67   18.10
  -3   6 -10  336.67   20.20
   3   6  10  306.47   19.00
   4  -6  10   12.00    4.30
  -4  -6 -10   18.00    4.60
  -4   6  10   16.70    4.90
  -4   6  10   12.20    3.90
  -4   6  10   19.50    4.60
  -4  -6  10   13.80    4.50
   4   6  10   12.30    4.90
   4   6  10   19.40    5.70
  -4   6 -10   13.20    5.30
  -5   6  10  554.44   27.40
  -5  -6 -10  521.45   28.20
   5  -6  10  563.54   29.10
  -5   6  10  510.85   28.00
  -5  -6  10  558.44   28.00
  -5   6 -10  554.04   30.40
   5   6  10  536.25   29.00
   5   6  10  489.35   27.80
  -6  -6 -10    0.80    4.30
  -6   6  10    6.30    4.70
  -6   6  10    7.30    4.60
   6  -6  10    0.10    3.70
   6   6  10    2.80    4.30
  -6   6 -10    0.60    4.60
  -6  -6  10    0.80    3.60
   6   6  10    1.80    4.20
   0  -7  10   31.20    5.90
   0   7  10   36.50    6.60
   0   7  10   26.70    5.50
   0   7 -10   37.00    6.90
  -1   7  10  197.78   11.00
   1   7 -10  174.38   13.80
  -1   7  10  200.18   13.70
   1  -7  10  185.28   12.90
  -1   7  10  177.08   12.80
   1   7  10  179.78   13.30
  -1   7 -10  185.88   14.50
   1   7  10  192.38   13.60
  -1  -7  10  176.98   12.60
   2  -7  10  456.55   24.40
  -2   7  10  503.65   24.30
   2   7 -10  464.25   26.30
  -2   7  10  502.75   22.50
  -2   7  10  473.45   24.90
   2   7  10  447.76   24.90
   2   7  10  435.96   24.40
  -2   7 -10  389.36   25.10
  -2  -7  10  462.75   24.10
  -3   7  10   33.60    5.80
  -3   7  10   27.30    5.90
   3  -7  10   28.40    6.00
  -3  -7 -10   30.00    5.90
  -3   7  10   28.50    6.30
   3   7  10   21.70    5.90
  -3  -7  10   22.70    5.50
   3   7  10   18.10    4.90
  -3   7 -10   20.60    6.50
  -4   7  10  255.17   17.30
  -4   7  10  262.47   21.40
   4  -7  10  289.37   18.20
  -4  -7 -10  268.47   17.60
  -4   7 -10  277.17   19.30
   4   7  10  275.17   17.90
   4   7  10  264.57   18.20
  -4  -7  10  274.97   17.10
  -5   7  10   50.09    8.70
  -5  -7 -10   33.20    7.10
   5  -7  10   49.80    8.20
   5   7  10   34.70    7.20
   5   7  10   46.80    8.70
  -5  -7  10   29.20    6.70
  -5   7 -10   32.00    7.40
   0   8  10    0.10    3.70
   0   8 -10    4.90    3.70
   0  -8  10    3.00    3.40
   0   8  10    0.90    3.80
  -1   8  10   15.10    5.20
   1   8 -10   19.20    6.40
  -1   8  10   28.80    6.10
   1  -8  10   26.40    5.90
  -1   8 -10   17.20    6.10
   1   8  10   18.90    5.70
  -1  -8  10   32.30    6.40
   1   8  10   15.50    5.50
   2  -8  10  157.88   13.10
   2   8 -10  186.88   14.80
  -2   8  10  166.98   13.70
  -2   8  10  206.18   13.70
  -2   8 -10  150.48   15.60
   2   8  10  188.78   14.40
  -2  -8  10  149.29   12.50
   2   8  10  177.58   14.00
  -3  -8 -10   72.59    9.70
  -3   8  10   89.09   10.00
  -3   8  10   80.69   10.50
   3  -8  10   57.59    9.20
  -3  -8  10   65.89    9.10
   3   8  10   75.49   10.50
  -3   8 -10   67.49   11.00
   3   8  10   87.49   10.90
  -4   8  10   24.40    6.40
  -4  -8 -10   27.60    6.80
   4  -8  10   22.80    6.30
   4   8  10   25.50    6.90
  -4  -8  10   31.90    6.80
  -4   8 -10   23.40    7.60
   4   8  10   31.30    8.20
   0   9 -10    6.90    5.30
   0   9  10    0.40    4.20
   0   9  10   -3.50    4.00
   0  -9  10    7.50    4.50
  -1   9  10   68.89   10.20
  -1   9  10   78.29   10.40
   1   9 -10   80.09   11.40
   1  -9  10   56.69    9.00
  -1  -9  10   71.59    9.80
   1   9  10   73.99   10.50
   1   9  10   90.09   11.50
  -1   9 -10   92.59   12.10
  -2   9  10   54.49    8.70
   2  -9  10   32.20    7.40
  -2   9  10   41.90    8.30
  -2  -9  10   45.60    8.10
  -2   9 -10   47.70    9.70
   2   9  10   38.70    8.50
   0   0 -11    0.50    1.30
   0   0  11   -2.70    1.40
   0   0  11   -1.50    1.00
   0   0  11   -1.00    1.20
   0   0  11    7.60    1.20
   0   0  11    0.30    0.80
   0   0 -11   -0.40    1.10
   1   0  11  778.92   33.50
   1   0  11  814.92   35.30
  -1   0 -11  799.22   34.60
   1   0  11  852.31   33.60
  -1   0  11  811.72   31.80
  -1   0  11  814.32   31.80
  -1   0  11  822.62   33.80
  -1   0  11  816.12   33.20
  -1   0  11  793.22   34.40
  -1   0 -11  819.52   33.60
   1   0  11  908.51   35.10
  -2   0  11    1.30    1.70
  -2   0  11    3.00    1.50
  -2   0 -11    2.50    1.30
   2   0  11    5.10    1.90
  -2   0 -11    1.30    1.60
  -2   0  11    2.60    0.90
  -2   0 -11    5.30    2.20
   2   0  11   -0.60    1.50
  -2   0  11    0.30    0.80
   2   0  11    2.70    1.70
  -3   0 -11  120.19    7.40
  -3   0  11  105.39    6.10
   3   0  11  110.99    7.80
  -3   0 -11  115.59    7.60
   3   0  11  101.89    8.20
   3   0  11  109.39    7.80
  -3   0 -11  121.79    8.70
  -3   0  11  119.09    5.30
  -3   0  11  108.19    6.40
   4   0  11   83.49    8.30
  -4   0  11   90.79    4.30
  -4   0  11   86.59    4.60
  -4   0  11   94.09    6.40
  -4   0 -11   90.19    8.90
  -4   0 -11   65.59    7.20
   4   0  11  104.59    8.00
   4   0  11   83.19    8.20
  -5   0 -11  333.67   18.40
  -5   0  11  344.57   17.30
   5   0  11  336.77   18.60
  -5   0 -11  333.27   19.40
  -5   0  11  321.67   17.20
   5   0  11  338.67   18.90
  -5   0  11  365.16   15.10
  -6   0 -11   36.00    6.60
   6   0  11   31.50    5.70
   6   0  11   35.80    6.40
  -6   0 -11   38.70    6.50
  -6   0  11   28.80    5.20
  -7   0 -11   51.19    8.50
  -7   0 -11   39.80    7.50
   7   0  11   41.60    6.80
  -7   0  11   42.30    6.90
   7   0  11   49.00    8.00
   8   0  11   85.59   10.00
  -8   0 -11  106.99   13.00
  -8   0 -11  100.09   12.40
   8   0  11   97.59   12.10
   0   1 -11    2.80    1.60
   0   1  11    3.30    1.30
   0   1  11    2.30    1.10
   0  -1  11    4.20    1.10
   0   1  11    3.70    1.50
   0   1  11    4.60    2.20
   0   1 -11    1.60    1.60
   0  -1 -11    4.70    1.60
   0  -1  11    5.00    1.80
   0  -1  11    1.90    0.90
   0  -1  11    6.00    2.10
  -1  -1 -11  702.13   28.60
  -1  -1 -11  738.23   28.70
  -1  -1 -11  718.63   28.60
  -1   1  11  696.03   28.70
   1  -1  11  703.23   29.60
  -1   1  11  766.82   28.80
   1  -1  11  738.93   32.20
   1  -1  11  782.02   30.80
  -1   1  11  731.43   29.00
  -1  -1 -11  702.83   30.50
  -1   1  11  736.03   28.80
  -1   1  11  713.33   30.60
  -1  -1  11  723.83   30.70
  -1  -1  11  714.63   27.90
   1  -1 -11  706.43   28.70
   1   1  11  718.53   29.90
  -1   1 -11  682.13   30.80
   1   1  11  716.03   30.60
  -1   1 -11  692.73   30.40
   1   1  11  685.03   31.30
  -1  -1  11  709.83   29.80
  -1  -1  11  700.03   27.90
   1   1  11  667.93   29.70
   2  -1  11 1219.68   49.50
  -2  -1 -11 1238.88   48.50
   2  -1  11 1151.98   49.30
  -2   1  11 1273.07   48.90
  -2   1  11 1188.78   48.00
  -2  -1 -11 1198.88   50.19
  -2  -1 -11 1208.98   48.70
  -2   1  11 1162.58   48.80
  -2   1  11 1231.18   48.00
  -2  -1  11 1172.08   47.30
  -2   1 -11 1235.48   48.50
  -2   1 -11 1189.58   49.80
  -2  -1  11 1244.58   48.40
  -2  -1  11 1171.18   47.40
   2   1  11 1241.98   49.60
  -2   1 -11 1181.28   50.39
  -2  -1  11 1217.38   49.99
   2   1  11 1199.18   50.79
   2   1  11 1169.58   49.50
  -3   1  11  305.97   13.60
  -3   1  11  306.27   14.10
  -3   1  11  313.07   14.10
  -3  -1 -11  321.57   16.30
   3  -1  11  301.47   15.50
   3  -1  11  308.37   15.70
  -3  -1 -11  310.07   15.00
  -3  -1 -11  331.27   15.00
   3   1  11  272.07   15.30
   3   1  11  282.77   15.40
  -3   1 -11  285.77   16.20
  -3  -1  11  306.37   13.80
  -3  -1  11  300.17   13.70
  -3   1 -11  293.97   14.80
   3   1  11  295.47   16.20
  -3   1 -11  279.47   15.50
  -4   1  11   49.90    5.20
  -4   1  11   39.50    4.60
  -4  -1 -11   54.29    6.10
   4  -1  11   47.80    6.10
  -4  -1 -11   44.30    6.40
  -4  -1 -11   35.70    5.00
  -4   1  11   49.70    2.90
   4  -1  11   53.59    6.30
   4   1  11   41.80    6.10
  -4   1 -11   41.70    6.50
  -4  -1  11   37.30    4.50
   4   1  11   45.40    5.90
   4   1  11   35.20    5.60
  -4  -1  11   46.50    3.00
   4  -1 -11   42.50    2.90
  -4  -1  11   43.90    3.00
  -4   1 -11   35.20    5.60
  -4  -1  11   41.90    4.50
  -5   1  11  240.68   14.80
  -5  -1 -11  241.38   15.10
   5  -1  11  234.68   14.40
  -5   1  11  240.58   13.50
   5  -1  11  237.88   14.80
  -5  -1  11  253.17   13.30
  -5  -1  11  233.98   11.80
  -5  -1  11  235.28   13.20
  -5   1 -11  217.38   14.40
  -5   1 -11  229.38   15.00
   5   1  11  239.78   14.80
   5   1  11  214.48   14.00
   6  -1  11  121.59   12.00
  -6  -1 -11  143.99   11.80
  -6   1  11  136.39   10.30
   6  -1  11  150.18   10.80
   6   1  11  143.39   11.60
  -6  -1  11  139.09   10.20
  -6   1 -11  124.29   12.40
  -6   1 -11  125.29   11.10
   6   1  11  127.89   10.40
  -7   1  11   80.59    9.50
  -7  -1 -11   79.79   10.40
   7  -1  11   74.29   10.10
   7  -1  11   78.99    9.20
   7   1  11   84.19   10.60
   7   1  11   91.09    9.80
  -7   1 -11   76.39   10.30
  -7   1 -11   66.89    9.90
  -7  -1  11   92.29    9.70
   0   2  11  341.77   15.50
   0  -2  11  330.77   14.70
   0  -2 -11  363.56   14.50
   0  -2  11  358.16   17.60
   0   2  11  326.27   15.20
   0  -2  11  330.17   14.70
   0  -2  11  353.36   16.90
   0  -2 -11  335.17   14.00
   0  -2 -11  333.87   15.20
   0   2 -11  330.67   16.50
   0   2  11  323.37   16.60
  -1   2  11    3.10    1.60
  -1   2  11    4.20    0.80
  -1  -2 -11   13.60    2.10
   1  -2  11    8.80    3.10
  -1   2  11    2.70    1.50
   1  -2  11    5.00    1.80
   1  -2  11    4.60    1.70
  -1   2  11    6.00    2.20
  -1  -2 -11    4.90    2.10
   1   2 -11    3.90    2.40
   1   2  11    4.70    1.90
  -1  -2  11    4.80    2.10
  -1   2 -11   10.00    2.90
   1  -2 -11    6.30    2.20
  -1   2 -11    6.80    1.20
   1   2  11    8.90    2.90
   1  -2 -11    3.40    1.10
  -1   2 -11    6.10    2.30
   1   2  11    8.10    2.20
  -1  -2  11    6.90    1.40
  -1  -2  11    7.90    1.40
  -2  -2 -11  942.91   39.90
  -2  -2 -11  934.41   38.70
   2  -2  11  948.41   39.30
  -2   2  11  906.01   38.70
  -2   2  11  935.41   38.30
  -2   2  11  942.11   38.40
  -2  -2 -11  929.81   37.40
   2  -2  11  964.80   39.30
  -2   2 -11  924.21   40.40
  -2   2 -11  886.61   40.00
  -2  -2  11  922.01   37.50
  -2  -2  11  943.61   37.60
   2   2  11  968.70   39.70
   2   2  11  896.61   39.40
  -2   2 -11  955.50   38.20
   2   2  11  881.21   40.40
  -2  -2  11  963.40   38.80
   3  -2  11    6.10    2.70
  -3   2  11    9.20    2.40
  -3   2  11    7.10    2.00
   3  -2  11    6.10    2.50
  -3  -2 -11    4.30    2.10
  -3   2  11    5.10    2.10
  -3  -2 -11   14.50    3.70
   3   2  11    6.00    2.90
  -3   2 -11    2.30    2.70
  -3   2 -11    6.00    3.00
  -3  -2  11    8.20    2.10
  -3  -2  11    5.60    1.90
   3   2  11    8.60    2.90
  -3   2 -11    6.90    2.40
   3   2  11    7.00    3.30
   3  -2 -11    7.30    1.30
   4  -2  11  340.37   18.10
  -4   2  11  305.07   16.50
  -4   2  11  342.87   14.80
   4  -2  11  346.87   18.30
  -4  -2 -11  334.47   17.60
  -4  -2 -11  321.47   18.20
  -4   2  11  317.17   16.70
  -4  -2  11  335.07   16.50
  -4  -2  11  350.46   15.00
   4   2  11  330.27   18.20
   4   2  11  331.67   18.20
  -4   2 -11  335.17   18.60
   4  -2 -11  367.56   15.10
   4   2  11  356.56   18.60
  -4   2 -11  320.67   18.30
  -4  -2  11  362.26   16.60
  -5  -2 -11  150.28   11.80
  -5   2  11  170.18   10.80
   5  -2  11  159.98   11.60
  -5   2 -11  173.78   12.40
  -5  -2  11  149.69   10.20
   5   2  11  164.28   11.90
  -5   2 -11  155.48   12.00
   5   2  11  155.98   11.10
  -6  -2 -11   65.09    9.00
  -6   2  11   65.99    8.00
   6  -2  11   84.09    9.90
  -6   2 -11   71.79    9.70
  -6   2 -11   85.09   10.10
   6   2  11   73.99    9.30
   6   2  11   76.49    8.90
  -6  -2  11   72.89    8.30
  -6  -2  11   88.39    6.90
   7  -2  11   21.60    5.40
  -7  -2 -11   24.60    6.40
   7  -2  11   21.00    6.00
  -7   2  11   14.20    4.70
   7   2  11    6.10    4.40
  -7  -2  11   19.70    5.40
  -7   2 -11   16.40    5.50
  -7   2 -11   30.60    6.80
   7   2  11   20.50    5.20
   0   3 -11 1211.28   51.39
   0  -3  11 1194.38   49.30
   0   3  11 1223.38   50.19
   0  -3 -11 1243.78   49.40
   0   3  11 1169.28   50.79
   0  -3 -11 1190.08   49.00
   0   3  11 1198.08   49.90
   0  -3  11 1242.48   49.40
   0   3 -11 1262.27   47.10
  -1   3  11  341.67   16.30
  -1  -3 -11  336.87   15.90
   1  -3  11  355.06   16.40
   1  -3  11  345.77   16.30
   1   3 -11  341.87   17.70
  -1   3  11  329.07   16.80
  -1   3  11  343.77   16.30
  -1  -3 -11  345.37   16.60
   1   3  11  339.77   17.60
   1  -3 -11  376.46   15.30
  -1  -3  11  335.67   15.50
   1   3  11  335.97   16.60
  -1  -3  11  332.97   15.50
   1  -3 -11  350.46   14.80
  -1   3 -11  320.07   17.40
   1   3  11  363.66   16.90
  -1   3 -11  334.67   15.00
  -2  -3 -11  529.85   23.30
   2  -3  11  470.25   23.30
  -2   3  11  528.75   23.20
  -2   3  11  517.45   23.20
   2  -3  11  554.94   23.80
  -2   3  11  514.95   21.80
  -2   3  11  520.55   23.20
  -2  -3 -11  555.94   24.30
  -2  -3 -11  518.45   21.20
  -2  -3  11  520.05   22.20
  -2   3 -11  493.75   24.60
  -2  -3  11  486.35   22.20
  -2   3 -11  503.55   24.60
  -2   3 -11  501.95   22.50
   2   3  11  495.05   24.60
   2  -3 -11  515.85   23.10
   2   3  11  492.25   23.90
   2   3  11  514.15   24.00
  -3  -3 -11  102.09    8.00
  -3   3  11   94.49    7.20
   3  -3  11   96.39    7.80
   3  -3  11  101.79    7.90
  -3   3  11   88.59    7.00
  -3   3  11   97.39    6.60
   3   3  11   84.99    8.80
   3   3  11  104.59    8.30
  -3  -3  11  110.69    7.00
   3   3  11   99.09    8.10
  -3  -3  11   96.09    6.80
  -3  -3  11  100.29    6.60
   3  -3 -11  115.09    6.30
  -3   3 -11   97.09    7.20
   3  -3 -11   96.89    6.60
  -3   3 -11  100.19    8.70
  -3   3 -11  106.59    8.80
  -4   3  11   23.10    4.00
  -4   3  11   14.10    3.60
  -4  -3 -11   14.40    4.30
   4  -3  11   12.30    3.90
  -4   3  11   18.20    2.90
  -4  -3 -11   19.20    4.80
  -4  -3  11   20.90    3.20
  -4  -3  11   16.90    3.50
   4   3  11   13.10    4.00
  -4   3 -11   13.30    3.90
  -4  -3  11   16.30    3.40
   4   3  11   13.00    6.70
   4   3  11   13.10    4.10
  -4   3 -11   12.90    4.40
  -5   3  11  184.58   12.20
   5  -3  11  184.48   12.60
  -5  -3 -11  185.88   13.00
  -5   3 -11  181.68   13.50
  -5   3 -11  187.38   13.70
  -5  -3  11  175.38   11.60
   5   3  11  197.48   12.90
   5   3  11  194.98   13.40
  -6  -3 -11   72.79    9.50
   6  -3  11   83.09   10.00
  -6   3  11   81.69    8.90
  -6   3 -11   61.69    9.10
  -6  -3  11  103.79    9.90
   6   3  11   70.29    9.40
  -6  -3  11   84.59    8.30
  -6   3 -11   68.39    9.60
   6   3  11   73.69    8.80
   7  -3  11  342.97   21.10
  -7   3  11  349.77   20.30
  -7  -3 -11  334.97   21.30
  -7   3 -11  322.67   21.50
   7   3  11  335.37   21.20
  -7   3 -11  321.47   20.80
  -7  -3  11  314.67   19.30
   7   3  11  341.77   19.90
   0  -4  11    1.50    1.90
   0   4 -11    1.40    1.30
   0   4  11    2.10    2.20
   0   4 -11    0.00    1.80
   0  -4 -11    2.30    1.80
   0  -4  11    2.20    2.00
   0   4  11   -0.10    2.30
   0   4  11    3.60    2.60
   0  -4 -11    3.80    1.90
  -1   4  11  102.29    7.80
   1   4 -11   83.39    8.80
  -1  -4 -11  106.99    7.30
  -1   4  11   98.79    7.60
   1   4 -11  103.79    5.30
   1  -4  11  105.09    7.30
   1  -4  11  102.59    7.30
  -1  -4 -11  100.29    7.40
  -1   4  11   92.69    7.40
  -1   4  11  104.19    4.80
  -1  -4  11  104.79    6.90
   1  -4 -11  105.69    6.10
  -1   4 -11   99.29    8.20
   1  -4 -11  105.79    6.70
   1   4  11   93.59    8.90
   1   4  11  102.99    7.80
  -1   4 -11  102.59    6.40
   1   4  11  103.69    7.90
  -1  -4  11   96.49    6.80
  -2   4  11  366.26   17.60
  -2   4  11  337.07   17.00
  -2   4  11  308.57   15.20
  -2   4  11  329.57   17.30
   2   4 -11  334.67   14.30
  -2  -4 -11  329.97   17.50
   2  -4  11  330.77   17.40
  -2  -4 -11  358.76   14.70
   2  -4  11  359.96   17.80
   2  -4 -11  332.47   14.40
   2   4  11  358.26   18.60
  -2   4 -11  343.87   18.80
  -2  -4  11  379.26   16.70
  -2  -4  11  326.87   16.30
   2   4  11  361.26   18.20
  -2   4 -11  334.57   16.40
   2  -4 -11  337.67   16.10
   2  -4 -11  336.87   14.40
   2   4  11  337.97   17.80
  -3   4  11  119.29    8.80
  -3  -4 -11  145.89    9.10
   3   4 -11  129.19    6.30
   3  -4  11  138.99    9.80
   3  -4  11  105.69    8.90
  -3   4  11  136.59    9.20
  -3   4  11  115.39    8.10
  -3  -4 -11  142.19   10.00
  -3   4  11  129.99    8.10
  -3  -4 -11  125.79    9.30
  -3   4 -11  120.09   10.20
   3   4  11  104.99   10.20
  -3   4 -11  110.99   11.10
   3   4  11  114.09    9.30
  -3  -4  11  118.39    8.00
   3   4  11  121.69    9.60
  -3  -4  11  110.19    8.20
  -4   4  11  409.66   18.00
   4  -4  11  361.26   20.30
  -4  -4 -11  365.56   20.60
  -4   4  11  377.86   19.60
  -4   4  11  369.96   18.90
   4   4  11  365.16   20.70
   4   4  11  373.76   20.40
  -4   4 -11  345.97   20.70
  -4  -4  11  388.76   19.20
  -4   4 -11  384.76   21.40
  -5   4  11  672.73   31.90
  -5  -4 -11  674.73   33.10
   5  -4  11  585.74   32.00
  -5   4  11  707.63   32.10
  -5  -4  11  674.23   31.40
  -5   4 -11  680.33   34.10
  -5   4 -11  674.23   33.50
   5   4  11  676.93   33.20
   5   4  11  689.33   32.80
  -6  -4 -11   68.09    9.50
  -6   4  11   80.29    9.40
   6  -4  11   78.99    9.90
  -6   4  11   91.49   10.10
   6   4  11   87.29   10.60
  -6  -4  11   81.59    9.20
  -6   4 -11  110.49   12.40
   6   4  11   80.49    9.80
  -6   4 -11   83.99   10.50
  -7   4  11   98.59   11.40
  -7  -4 -11   92.79   11.90
   7  -4  11   95.29   12.00
  -7   4  11  122.29   12.80
   7   4  11  118.19   13.20
  -7   4 -11  106.19   12.80
  -7  -4  11  115.89   13.70
  -7   4 -11  126.09   14.40
   7   4  11  115.49   11.90
   0   5 -11   22.20    5.20
   0   5  11   33.50    5.20
   0   5 -11   21.50    3.20
   0  -5  11   15.60    3.60
   0   5  11   21.30    4.60
   0   5  11   27.80    4.80
   0  -5 -11   21.10    3.80
   0  -5 -11   27.40    4.10
   0  -5  11   29.50    4.50
   1  -5  11  229.28   13.60
  -1  -5 -11  232.38   13.40
  -1   5  11  247.58   14.10
   1  -5  11  251.57   13.90
  -1  -5 -11  267.67   11.10
  -1   5  11  244.28   11.00
   1   5 -11  258.57   12.00
  -1   5  11  248.68   14.30
   1   5 -11  244.58   15.50
  -1   5  11  229.38   13.90
   1   5  11  244.58   14.80
  -1  -5  11  232.68   13.30
   1  -5 -11  238.48   16.80
   1   5  11  249.48   14.60
  -1  -5  11  222.38   13.10
   1   5  11  242.38   14.30
  -1   5 -11  238.98   15.30
  -2   5  11  740.03   32.10
  -2   5  11  694.03   29.80
  -2  -5 -11  713.53   32.20
   2  -5  11  720.43   32.60
  -2   5  11  627.24   31.90
  -2  -5  11  729.33   31.50
   2   5  11  735.33   33.20
  -2  -5  11  661.73   31.30
   2   5  11  713.53   33.20
  -2   5 -11  746.03   34.40
  -3   5  11   90.59    7.00
  -3   5  11   84.69    8.80
  -3   5  11   90.69    7.30
  -3  -5 -11  106.29    9.90
   3  -5  11   91.49    9.20
   3   5  11   81.39    9.10
  -3   5 -11   93.59   10.40
   3   5  11   96.69    9.80
  -3  -5  11   89.09    7.70
  -4   5  11   14.20    3.50
  -4   5  11   19.20    4.70
  -4  -5 -11   19.90    4.70
   4  -5  11   14.90    4.70
  -4   5  11   26.00    4.80
  -4  -5  11   21.90    4.60
  -4   5 -11   21.90    5.70
   4   5  11   25.10    5.80
   4   5  11   36.80    6.40
  -4   5 -11   25.60    6.20
  -5   5  11   -0.90    2.50
  -5  -5 -11   -1.60    3.40
  -5   5  11   -3.00    2.60
  -5   5 -11    3.60    3.90
  -5  -5  11   -1.20    2.90
  -5   5 -11    2.10    4.20
   5   5  11   -0.80    3.50
   5   5  11    0.90    3.50
   6  -5  11  128.59   13.10
  -6   5  11  126.49   10.90
  -6  -5 -11  116.49   12.90
  -6   5  11  111.49   12.10
  -6   5 -11  102.49   12.70
  -6  -5  11  119.09   11.80
  -6   5 -11  119.99   13.70
   6   5  11  127.19   13.60
   6   5  11  135.29   13.00
   0   6  11   -2.90    2.40
   0   6  11   -1.40    2.70
   0  -6  11    2.20    2.60
   0   6 -11    2.50    2.90
  -1   6  11  401.16   21.50
   1   6 -11  419.66   23.00
  -1   6  11  402.36   21.30
  -1   6  11  405.26   18.20
   1  -6  11  426.16   21.40
  -1   6 -11  427.26   23.20
   1   6  11  390.96   21.60
   1   6  11  418.46   22.10
  -1  -6  11  405.16   20.80
  -2  -6 -11  550.84   27.00
  -2   6  11  543.55   26.70
  -2   6  11  552.54   24.60
   2  -6  11  554.84   27.40
   2   6 -11  547.05   29.20
  -2   6  11  529.05   27.30
   2   6  11  561.94   27.90
  -2  -6  11  531.25   26.40
   2   6  11  604.74   28.70
  -2   6 -11  580.74   29.40
  -3   6  11    1.20    2.60
   3  -6  11    5.50    3.40
  -3   6  11   10.90    4.40
  -3  -6 -11   -3.00    2.60
  -3   6  11    1.70    2.50
  -3   6 -11    2.70    3.90
   3   6  11    3.90    3.80
   3   6  11    0.50    3.30
  -3  -6  11    1.80    2.70
  -4   6  11   92.09    8.90
  -4   6  11  119.69   11.50
  -4  -6 -11  101.99   11.10
  -4   6  11  110.59    8.90
   4  -6  11   96.69   11.00
  -4   6 -11  113.89   12.70
   4   6  11  110.69   11.80
   4   6  11  108.19   11.30
  -4  -6  11  110.39    9.40
  -5  -6 -11   14.10    5.20
  -5   6  11   19.70    5.50
   5  -6  11    5.00    4.40
  -5   6  11   14.00    4.70
   5   6  11   13.90    5.10
  -5   6 -11   11.90    5.10
   5   6  11   10.80    5.40
  -5  -6  11   13.20    4.90
   6  -6  11   14.60    5.50
  -6  -6 -11   25.40    6.90
  -6   6  11   17.70    6.70
   6   6  11   22.40    6.40
   6   6  11   12.60    5.60
  -6   6 -11   12.00    5.90
   0   7 -11  174.68   13.40
   0   7  11  179.68   13.10
   0  -7  11  162.78   12.00
   0   7  11  168.08   12.70
  -1   7  11  115.39   10.90
  -1   7  11  118.99   11.50
   1   7 -11  118.09   12.50
   1  -7  11  103.29   10.40
  -1   7 -11  112.19   12.40
   1   7  11  110.29   11.10
   1   7  11  117.69   11.60
  -1  -7  11  102.69   10.20
  -2   7  11  132.39   10.30
  -2   7  11  123.29   11.90
   2   7 -11  113.69   12.90
   2  -7  11   95.19   10.40
  -2  -7 -11  109.39   10.80
   2   7  11  117.49   12.10
  -2  -7  11  111.79    9.70
  -2   7 -11  116.49   12.70
   2   7  11  109.59   11.60
  -3   7  11   83.79   10.00
   3  -7  11   76.29    9.60
  -3   7  11   75.19    8.80
  -3  -7 -11   73.99    9.40
  -3  -7  11   79.69    9.20
   3   7  11  104.09   11.40
   3   7  11  108.29   11.30
  -3   7 -11   82.49   11.40
  -4  -7 -11   -4.70    3.00
  -4   7  11    3.10    3.90
   4  -7  11    4.40    4.00
  -4   7 -11   -2.30    4.30
   4   7  11    0.20    3.50
   4   7  11   -1.10    3.50
  -4  -7  11   -5.00    3.00
   5  -7  11   31.60    7.00
  -5   7  11   32.10    7.20
  -5  -7 -11   30.30    7.30
   5   7  11   40.80    8.40
   5   7  11   34.40    7.50
  -5   7 -11   34.30    8.20
   0   8 -11  121.09   13.30
   0   8  11  135.49   13.00
   0  -8  11  116.79   11.60
   0   8  11  109.79   11.70
  -1   8  11   23.70    6.10
   1  -8  11   17.00    5.20
  -1   8  11   20.60    5.70
   1   8 -11   14.90    5.50
  -1  -8  11   15.50    5.10
   1   8  11   19.90    5.90
   1   8  11   24.30    6.50
  -1   8 -11   17.60    5.50
  -2   8  11   83.59    9.80
   2  -8  11   71.89    9.60
  -2   8  11   94.59   11.10
   2   8  11   77.89   10.40
  -2  -8  11   69.29    9.00
   2   8  11   65.59    9.70
  -2   8 -11   63.89   10.30
  -3   8  11   76.09    9.30
  -3   8  11   72.29    9.90
  -3  -8 -11   59.39    9.00
   3  -8  11   51.79    8.60
   3   8  11   66.69    9.80
  -3   8 -11   79.89   11.60
   3   8  11   67.79   10.20
  -3  -8  11   54.99    8.50
   0   9  11    1.40    4.20
   0   9  11    4.40    3.90
   0  -9  11   -0.70    3.60
   0   9 -11    9.70    4.90
  -1   9  11   12.70    5.40
   1   9 -11    6.90    5.80
  -1   9  11   16.30    5.80
   1  -9  11   16.50    6.10
  -1   9 -11   20.10    7.10
  -1  -9  11   15.10    5.50
   1   9  11   12.00    4.70
   0   0  12   72.99    5.20
   0   0 -12   67.39    5.00
   0   0  12   77.59    4.10
   0   0  12   77.89    6.10
   0   0  12   70.29    4.70
   0   0  12   75.19    4.00
   0   0 -12   74.29    4.80
   1   0  12   12.30    2.70
   1   0  12    7.50    2.90
  -1   0  12    9.10    1.80
   1   0  12    7.80    1.90
  -1   0 -12    6.00    2.30
  -1   0  12    8.30    0.80
  -1   0  12    7.30    0.80
  -1   0 -12   10.80    2.10
  -1   0  12    7.80    1.90
  -1   0  12    8.50    2.40
   1   0  12    6.60    1.80
   2   0  12  351.66   17.00
  -2   0  12  350.16   16.60
  -2   0  12  338.17   14.90
   2   0  12  377.96   17.20
  -2   0 -12  357.96   16.80
  -2   0  12  389.66   15.20
  -2   0 -12  355.46   17.90
   2   0  12  350.46   18.20
  -2   0  12  360.96   15.00
  -2   0  12  375.96   17.10
  -2   0 -12  377.16   16.00
   3   0  12  151.88    9.50
  -3   0 -12  139.39    9.80
  -3   0  12  146.49    6.20
  -3   0  12  138.59    7.50
  -3   0  12  144.69    7.60
  -3   0 -12  139.79    8.40
   3   0  12  125.99    9.60
  -3   0 -12  135.79    8.70
   3   0  12  148.89    9.40
  -4   0 -12  403.56   19.80
  -4   0  12  416.46   16.90
   4   0  12  375.86   20.30
  -4   0  12  402.06   16.40
  -4   0  12  427.36   16.50
  -4   0  12  457.25   19.10
   4   0  12  392.26   20.60
  -4   0 -12  374.26   19.90
   4   0  12  363.06   20.50
  -4   0 -12  435.16   21.70
  -4   0  12  390.16   18.70
   5   0  12   37.30    6.10
   5   0  12   19.90    4.80
  -5   0 -12   28.30    5.70
  -5   0  12   30.30    4.60
  -5   0 -12   34.80    5.90
  -6   0  12   41.50    6.00
   6   0  12   48.30    7.20
  -6   0 -12   55.99    7.80
  -6   0 -12   46.10    7.70
   6   0  12   49.99    7.70
  -7   0 -12  159.58   15.30
  -7   0  12  175.48   12.50
  -7   0 -12  169.28   13.80
   7   0  12  153.08   13.30
   7   0  12  174.58   12.60
   0   1  12  521.85   20.60
   0  -1  12  509.65   20.90
   0   1 -12  531.75   22.80
   0   1 -12  478.75   22.50
   0   1  12  494.75   21.30
   0  -1  12  517.15   20.90
   0  -1 -12  495.25   21.90
   0   1  12  497.35   23.40
   0   1  12  496.65   21.30
   0   1  12  525.75   22.10
   0  -1  12  532.15   22.80
   0  -1  12  540.65   22.90
  -1   1  12  240.78   10.80
  -1   1  12  246.18   10.90
   1  -1  12  241.78   12.60
  -1   1  12  242.58   11.10
  -1  -1 -12  234.58   10.70
   1  -1  12  241.58   11.70
  -1   1  12  242.48   12.70
  -1  -1 -12  259.37   10.30
   1  -1  12  229.18   11.50
  -1   1  12  253.57   11.00
  -1  -1 -12  235.08   12.40
  -1  -1  12  264.07   12.10
   1  -1 -12  251.57   10.90
  -1  -1  12  250.77   12.70
  -1  -1  12  256.27   10.00
   1   1  12  261.37   12.10
  -1  -1  12  244.78   10.00
  -1   1 -12  245.18   12.50
   1   1  12  255.77   12.70
   1   1  12  240.88   13.50
   1   1  12  241.88   11.90
  -1   1 -12  245.18   12.90
  -2  -1 -12  393.16   19.60
  -2  -1 -12  426.86   18.10
  -2  -1 -12  400.96   17.80
   2  -1  12  396.46   18.70
  -2   1  12  421.26   18.60
  -2   1  12  397.16   18.20
  -2   1  12  392.96   17.30
   2  -1  12  413.66   18.90
  -2   1  12  397.96   17.30
  -2  -1  12  418.76   17.80
  -2   1 -12  414.66   17.60
  -2  -1  12  426.26   20.80
  -2  -1  12  426.36   16.70
  -2   1 -12  413.16   19.30
   2   1  12  361.16   18.60
  -2  -1  12  407.36   16.70
   2   1  12  411.46   20.30
   2   1  12  409.96   19.00
  -2   1 -12  400.86   19.90
   3  -1  12  252.87   13.60
  -3   1  12  240.28   11.80
  -3  -1 -12  228.18   12.70
  -3  -1 -12  244.78   14.20
   3  -1  12  244.68   13.50
  -3  -1 -12  235.38   12.60
  -3   1  12  237.98   12.00
  -3   1  12  237.08   12.00
   3   1  12  251.97   13.80
  -3   1 -12  261.97   14.70
   3   1  12  241.58   14.40
   3   1  12  272.27   14.00
  -3  -1  12  262.87   11.80
  -3   1 -12  275.37   14.10
  -3   1 -12  272.67   12.90
  -3  -1  12  242.68   11.60
  -3  -1  12  269.97   11.70
  -3  -1  12  249.78   12.00
  -4   1  12   23.30    3.60
  -4  -1 -12   18.50    4.00
  -4  -1 -12   22.50    4.80
   4  -1  12   19.10    4.40
   4  -1  12   19.90    4.20
  -4   1  12   23.70    2.40
  -4   1  12   18.90    3.30
  -4  -1 -12    6.70    2.50
  -4  -1  12   22.30    2.50
  -4  -1  12   15.40    3.00
   4   1  12   15.40    4.30
  -4   1 -12   16.80    3.70
   4   1  12   22.00    4.60
  -4   1 -12   19.60    4.90
  -4  -1  12   21.30    3.30
   4   1  12   17.00    4.10
  -4   1 -12   14.80    4.00
  -5  -1 -12   38.00    6.30
  -5  -1 -12   44.80    6.40
  -5   1  12   47.50    5.70
   5  -1  12   49.70    6.70
   5  -1  12   49.80    6.90
  -5  -1  12   45.70    4.40
  -5  -1  12   39.10    5.20
  -5   1 -12   41.10    6.70
   5   1  12   38.70    6.30
   5   1  12   38.60    6.40
  -5   1 -12   38.70    6.40
  -6  -1 -12  127.59   12.90
  -6   1  12  132.49   10.10
  -6  -1 -12  132.99   10.80
   6  -1  12  146.19   11.80
   6  -1  12  138.59   10.60
   6   1  12  156.78   11.50
   6   1  12  142.99   11.70
  -6   1 -12  133.39   11.40
  -6   1 -12  149.49   11.80
  -6  -1  12  136.89   10.20
  -7  -1 -12  218.18   15.60
  -7  -1 -12  220.08   15.10
  -7   1  12  185.08   13.70
   7  -1  12  209.38   15.10
   7  -1  12  204.28   14.20
   7   1  12  207.38   14.30
  -7   1 -12  213.98   15.90
  -7   1 -12  206.38   15.40
  -7  -1  12  185.58   13.40
   7   1  12  206.08   15.50
   0  -2 -12   73.79    5.00
   0   2  12   80.49    5.30
   0  -2  12   77.09    4.60
   0  -2  12   69.49    4.50
   0   2  12   72.19    6.00
   0   2 -12   58.59    6.20
   0   2  12   73.59    5.00
  -1   2  12  182.98   10.00
  -1  -2 -12  167.28    9.60
  -1   2  12  172.18    8.70
  -1  -2 -12  171.58    8.30
  -1   2  12  161.48    8.60
   1  -2  12  172.68    9.00
  -1   2  12  166.98    7.00
   1  -2  12  158.88    8.80
   1   2 -12  170.08   10.20
   1   2  12  164.08    9.30
   1  -2 -12  174.08    7.70
   1   2  12  161.68    9.20
  -1  -2  12  174.58    9.50
   1   2  12  174.38   10.70
  -1   2 -12  179.48   10.50
  -1   2 -12  160.88   10.00
  -1  -2  12  166.08    7.80
  -1  -2  12  157.68    7.80
  -2   2  12   69.49    4.90
  -2  -2 -12   70.19    4.00
  -2  -2 -12   62.19    6.40
  -2   2  12   55.19    5.30
   2  -2  12   59.29    5.80
   2  -2  12   51.59    5.50
  -2   2  12   69.19    4.90
  -2  -2 -12   71.09    5.20
  -2  -2  12   60.09    4.00
   2   2  12   60.29    6.90
  -2   2 -12   62.39    6.80
  -2  -2  12   65.79    5.10
   2   2  12   65.89    6.30
  -2  -2  12   64.89    4.10
  -2   2 -12   64.19    4.50
   2   2  12   65.29    6.30
  -2   2 -12   57.09    6.30
   3  -2  12  190.48   11.60
  -3   2  12  183.58   10.50
  -3  -2 -12  204.28   10.40
  -3  -2 -12  209.08   11.30
  -3  -2 -12  201.68   12.40
  -3   2  12  207.58   10.40
   3  -2  12  195.88   11.70
  -3   2  12  201.08   10.60
   3   2  12  187.68   12.30
  -3   2 -12  188.18   12.60
   3   2  12  211.68   12.20
  -3  -2  12  203.98   10.00
   3   2  12  215.18   12.10
  -3   2 -12  198.68   12.40
  -3   2 -12  183.58   10.60
  -3  -2  12  198.18   10.10
   4  -2  12  550.74   28.20
  -4   2  12  627.74   25.30
  -4   2  12  601.44   27.10
  -4  -2 -12  620.04   29.40
   4  -2  12  619.24   31.90
  -4   2  12  534.75   26.80
  -4  -2  12  651.03   25.70
  -4   2 -12  591.94   29.00
  -4  -2  12  634.64   26.80
   4   2  12  590.14   28.70
   4   2  12  645.04   31.40
  -4   2 -12  606.94   29.50
  -4  -2  12  591.34   26.50
   4   2  12  583.94   28.80
  -5   2  12  298.67   15.80
  -5  -2 -12  271.07   17.30
   5  -2  12  294.17   17.20
   5   2  12  278.17   17.10
  -5  -2  12  274.77   15.30
   5   2  12  303.17   17.30
  -5   2 -12  291.67   17.80
  -5   2 -12  286.17   17.40
  -6   2  12   83.69    8.80
   6  -2  12   52.09    8.00
  -6  -2 -12   59.99    8.90
   6  -2  12   69.09    8.50
  -6   2 -12   58.09    8.70
  -6  -2  12   75.19    8.10
   6   2  12   66.79    8.40
   6   2  12   65.29    8.90
  -6   2 -12   54.49    8.70
   7  -2  12  160.48   12.50
  -7   2  12  166.48   12.80
   7  -2  12  161.48   13.60
  -7  -2 -12  171.18   13.60
  -7   2 -12  162.28   15.80
   7   2  12  155.38   15.10
  -7  -2  12  155.88   12.20
   7   2  12  164.78   13.10
  -7   2 -12  153.98   13.60
   0  -3 -12  508.65   22.00
   0   3  12  501.75   22.70
   0  -3  12  508.45   22.10
   0   3  12  481.55   23.70
   0   3 -12  460.75   23.80
   0  -3  12  552.24   22.30
   0  -3 -12  500.75   21.50
   0   3  12  518.95   23.00
  -1   3  12   14.50    2.80
  -1   3  12   12.90    3.20
   1  -3  12   16.70    3.00
   1   3 -12   15.80    3.70
  -1  -3 -12   17.90    3.20
  -1  -3 -12   17.90    2.80
  -1   3  12   16.30    3.00
   1  -3  12   17.80    3.20
  -1  -3  12   13.60    2.40
   1   3  12   14.70    3.30
   1  -3 -12   19.00    2.20
  -1   3 -12   15.10    3.70
   1  -3 -12   17.00    2.20
   1   3  12   11.50    2.90
  -1   3 -12   20.00    2.20
   1   3  12    8.80    3.30
  -1  -3  12   16.20    2.60
   2  -3  12  735.13   31.60
  -2  -3 -12  712.43   28.50
  -2  -3 -12  755.42   32.20
  -2  -3 -12  702.93   31.00
  -2   3  12  691.93   31.00
  -2   3  12  738.13   29.50
  -2   3  12  659.73   30.80
   2  -3  12  684.63   31.30
  -2   3  12  728.13   31.00
  -2  -3 -12  713.33   28.50
  -2  -3  12  743.23   30.10
  -2   3 -12  717.23   30.20
   2  -3 -12  758.02   29.00
   2   3  12  741.23   32.20
   2   3  12  712.03   32.90
  -2  -3  12  681.93   29.90
   2   3  12  717.33   32.00
  -2   3 -12  735.73   33.00
  -2   3 -12  676.73   32.50
  -3   3  12 1131.79   46.30
  -3  -3 -12 1102.29   47.50
  -3  -3 -12 1108.59   48.40
  -3   3  12 1146.49   47.10
  -3   3  12 1127.19   47.10
   3  -3  12 1206.18   48.40
   3  -3  12 1163.68   48.30
   3  -3 -12 1195.18   45.00
  -3   3 -12 1114.89   47.00
  -3  -3  12 1079.59   46.20
   3   3  12 1119.09   48.90
  -3   3 -12 1142.49   49.30
   3   3  12 1080.39   48.20
  -3   3 -12 1031.20   48.70
   3   3  12 1113.29   48.40
  -3  -3  12 1060.69   46.00
   3  -3 -12 1140.89   46.40
   4  -3  12  105.29    9.00
  -4   3  12  122.89    7.20
  -4  -3 -12  108.29   10.40
  -4   3  12  121.29    8.50
  -4  -3  12  107.79    7.90
  -4   3 -12  107.69   10.90
  -4  -3  12  109.59    7.80
   4   3  12  121.59    9.70
   4   3  12  124.99   10.00
  -4   3 -12  116.89   10.10
  -5   3  12   29.30    5.10
  -5  -3 -12   16.20    4.40
   5  -3  12   25.50    5.50
   5   3  12   19.60    5.20
   5   3  12   22.00    5.30
  -5   3 -12   26.40    6.00
  -5  -3  12   21.10    4.30
  -5   3 -12   25.30    5.90
  -6  -3 -12   62.09    8.90
  -6   3  12   70.99    8.50
   6  -3  12   73.19    9.40
  -6  -3  12   71.19    7.60
   6   3  12   67.69    8.80
  -6   3 -12   59.79    9.00
   6   3  12   71.69    9.60
  -6  -3  12   74.19    8.20
  -6   3 -12   69.39    9.70
  -7  -3 -12  317.17   21.10
   7  -3  12  334.97   21.00
  -7   3  12  346.87   20.00
  -7   3 -12  329.77   21.50
  -7   3 -12  327.97   21.70
   7   3  12  298.27   19.30
   7   3  12  331.97   21.10
  -7  -3  12  323.17   19.30
   0  -4  12    3.20    2.10
   0   4  12    1.60    2.30
   0   4  12    2.60    2.30
   0  -4 -12    4.50    2.00
   0   4 -12    4.00    3.10
   0  -4  12    2.60    2.10
   0  -4 -12    3.40    2.00
   0   4  12    0.50    2.30
   0   4 -12    1.80    1.20
   1  -4  12  478.55   21.80
  -1  -4 -12  455.45   21.60
  -1  -4 -12  459.25   21.30
  -1   4  12  467.95   21.90
   1   4 -12  462.65   23.50
   1  -4  12  433.46   21.50
  -1   4  12  432.06   21.60
  -1   4  12  463.85   22.40
  -1   4 -12  457.25   20.10
  -1   4 -12  477.15   23.60
   1  -4 -12  455.75   20.60
   1   4  12  463.85   22.30
  -1  -4  12  480.15   21.10
  -1  -4  12  446.76   20.90
   1   4  12  472.35   22.40
   1  -4 -12  474.05   20.00
   1   4  12  488.55   23.40
  -2   4  12   13.80    2.30
  -2   4  12   12.60    3.30
  -2   4  12   14.10    3.40
  -2  -4 -12   10.00    3.20
  -2  -4 -12   10.40    1.50
   2  -4  12   10.80    3.20
   2  -4  12    6.70    3.00
  -2   4  12   14.00    3.30
  -2  -4 -12   10.20    3.30
   2  -4 -12   11.40    1.50
   2   4  12    7.60    3.20
   2  -4 -12   16.50    2.90
   2  -4 -12   13.00    1.60
  -2   4 -12   20.00    4.80
   2   4  12   14.60    3.80
  -2  -4  12   11.90    2.90
  -2   4 -12    8.20    2.70
   2   4  12   13.50    3.80
  -2  -4  12   16.80    3.10
  -3  -4 -12  619.94   29.60
  -3   4  12  622.44   27.80
  -3   4  12  637.74   27.30
  -3   4  12  625.64   28.70
   3  -4  12  607.84   29.10
  -3   4  12  636.74   34.50
  -3  -4  12  626.14   27.60
  -3   4 -12  629.04   30.50
   3   4  12  629.74   29.80
  -3   4 -12  599.54   30.40
  -3  -4  12  595.44   27.70
   3   4  12  615.94   29.90
  -4   4  12   12.50    3.00
  -4   4  12   14.90    3.70
   4  -4  12   11.30    4.10
  -4  -4 -12    9.50    4.10
  -4   4  12   13.20    3.70
  -4   4 -12   10.50    4.00
   4   4  12   12.20    3.80
  -4   4 -12   15.70    5.00
   4   4  12    7.40    3.70
  -4  -4  12    7.30    3.00
  -5   4  12   36.30    5.90
   5  -4  12   33.40    6.30
  -5  -4 -12   27.10    6.10
  -5   4  12   36.30    6.10
  -5  -4  12   32.40    5.50
   5   4  12   35.10    6.40
  -5   4 -12   34.60    7.00
  -5   4 -12   29.60    6.90
   5   4  12   32.50    6.60
  -6   4  12    8.50    4.00
  -6   4  12    7.40    3.80
  -6  -4 -12    8.70    4.80
   6  -4  12   10.30    4.80
  -6  -4  12   14.10    4.60
   6   4  12   11.00    4.30
  -6   4 -12   18.20    6.00
   6   4  12    8.20    4.30
  -6   4 -12    5.00    4.80
   0  -5 -12  264.97   14.20
   0   5 -12  287.97   16.90
   0  -5  12  286.67   15.20
   0   5  12  296.37   17.80
   0   5  12  290.07   15.90
   0  -5  12  272.87   15.00
   0   5  12  279.37   16.20
   1  -5  12  294.87   16.70
   1  -5  12  306.27   16.40
  -1   5  12  319.27   17.00
   1   5 -12  297.17   18.10
  -1  -5 -12  313.27   16.10
  -1   5  12  313.97   17.00
  -1   5 -12  283.77   17.90
   1  -5 -12  320.27   14.80
   1   5  12  311.97   17.60
   1   5  12  274.87   16.60
  -1  -5  12  329.77   16.20
  -1  -5  12  326.87   16.20
   2  -5  12  451.05   22.70
  -2   5  12  433.86   22.50
  -2  -5 -12  456.25   22.60
  -2   5  12  465.85   22.40
  -2   5  12  478.45   19.80
   2   5  12  419.76   23.10
  -2   5 -12  435.86   24.10
  -2  -5  12  443.96   21.70
   2  -5 -12  461.45   19.50
   2   5  12  454.65   23.20
   3  -5  12  142.19   10.90
  -3  -5 -12  164.18   11.50
  -3   5  12  142.39    9.20
  -3   5  12  163.18   10.40
  -3   5  12  147.89   10.90
   3   5  12  162.68   11.90
  -3  -5  12  168.68   10.70
   3   5  12  154.08   12.00
  -3   5 -12  160.78   12.70
  -4   5  12   83.59    7.30
  -4   5  12   75.89    7.30
  -4   5  12   62.19    7.90
   4  -5  12   77.79    9.10
  -4  -5 -12   93.09   10.10
  -4   5 -12   73.59   10.10
  -4  -5  12   84.99    8.40
   4   5  12   80.59    9.80
   4   5  12   87.59   10.00
  -4   5 -12   86.89   10.30
  -5   5  12   22.20    5.40
  -5  -5 -12   28.60    6.10
  -5   5  12   27.20    5.50
  -5   5 -12   25.50    6.20
  -5  -5  12   25.40    5.10
  -5   5 -12   17.60    5.80
   5   5  12   18.80    5.80
   5   5  12   32.80    6.60
  -6  -5 -12   69.49   10.00
  -6   5  12   46.90    8.10
   6  -5  12   73.79   10.10
  -6   5  12   79.09   10.30
  -6   5 -12   85.59   11.00
   6   5  12   80.89   10.90
  -6   5 -12   75.09   11.20
  -6  -5  12   76.39    9.20
   6   5  12   98.79   11.10
   0   6  12  159.48   11.50
   0   6 -12  165.98   12.80
   0  -6 -12  157.58   10.10
   0   6  12  147.49   11.40
   0  -6  12  151.68   10.70
  -1  -6 -12  184.88   11.60
  -1   6  12  193.18   12.40
   1  -6  12  181.88   11.80
   1   6 -12  158.28   13.00
  -1   6  12  178.88   12.40
  -1  -6  12  153.78   11.00
   1   6  12  178.08   12.50
  -1   6 -12  159.08   12.60
   1   6  12  156.48   12.30
  -2   6  12  106.29   10.20
  -2   6  12   86.69    8.80
   2  -6  12   91.99    9.50
  -2  -6 -12  112.59    8.90
   2   6  12   99.79   10.30
  -2  -6  12   79.39    8.40
  -2   6 -12   78.59   10.10
   2   6  12   90.89    9.90
   3  -6  12    6.30    3.70
  -3   6  12    6.40    3.80
  -3   6  12   10.00    3.50
  -3  -6 -12    5.50    3.70
   3   6  12    4.00    4.30
  -3  -6  12    6.10    3.30
   3   6  12   23.30    5.50
  -3   6 -12    7.80    4.70
  -4   6  12  390.76   21.10
  -4   6  12  346.87   18.90
  -4  -6 -12  340.27   20.80
   4  -6  12  386.76   21.50
  -4  -6  12  394.96   20.60
  -4   6 -12  356.16   22.40
   4   6  12  352.26   21.60
   4   6  12  344.57   21.10
  -5   6  12   57.49    8.40
  -5  -6 -12   44.40    8.20
   5  -6  12   59.99    9.20
  -5   6 -12   29.00    7.80
   5   6  12   67.59    9.50
   5   6  12   58.09    9.20
  -5  -6  12   41.90    7.00
   0  -7  12   33.30    5.90
   0   7 -12   41.50    7.80
   0   7  12   37.30    6.30
   0   7  12   33.60    6.60
  -1  -7 -12  232.78   14.00
   1  -7  12  237.48   15.00
  -1   7  12  230.78   15.10
  -1   7  12  220.38   14.80
   1   7 -12  187.78   15.60
   1   7  12  218.18   15.10
   1   7  12  223.48   15.40
  -1   7 -12  198.48   15.90
  -1  -7  12  231.38   14.50
  -2   7  12  247.98   15.50
  -2  -7 -12  222.68   14.90
  -2   7  12  217.78   15.80
   2  -7  12  246.38   15.90
   2   7  12  275.27   17.10
   2   7  12  252.77   16.70
  -2  -7  12  244.68   15.20
  -2   7 -12  245.68   17.50
  -3   7  12  151.08   12.40
   3  -7  12  171.68   12.80
  -3  -7 -12  133.29   11.40
  -3   7  12  130.49   10.70
   3   7  12  149.88   12.70
  -3   7 -12  159.18   13.40
   3   7  12  129.29   13.10
  -3  -7  12  153.78   11.80
  -4   7  12   27.40    6.40
  -4   7  12   58.09    7.60
  -4  -7 -12   43.70    7.80
   4  -7  12   42.60    7.90
   4   7  12   50.69    8.80
   4   7  12   39.10    7.40
  -4  -7  12   51.19    7.60
  -4   7 -12   45.80    8.60
   0   8 -12   52.19    9.30
   0   8  12   59.39    8.70
   0   8  12   55.69    8.50
   0  -8  12   51.99    8.20
  -1   8  12  132.69   12.90
   1   8 -12  101.09   12.90
   1  -8  12  132.49   12.70
  -1   8  12  144.69   13.70
  -1   8 -12  128.99   14.10
  -1  -8  12  139.79   11.70
   1   8  12  107.99   12.50
   1   8  12  140.59   13.90
  -2  -8 -12  107.69   11.10
  -2   8  12   96.09   10.80
   2  -8  12  106.09   11.60
  -2   8  12   92.19   11.20
  -2   8 -12  104.69   12.70
   2   8  12   93.19   11.40
  -2  -8  12  100.49   11.00
   2   8  12   92.89   11.70
  -3  -8 -12  140.49   13.40
  -3   8  12  151.98   14.50
   3  -8  12  125.39   13.20
  -3   8  12  151.78   12.10
   3   8  12  131.59   14.20
  -3   8 -12  121.79   14.70
  -3  -8  12   96.39   13.00
   0   0  13    5.70    2.50
   0   0  13    1.40    1.30
   0   0  13    1.10    1.50
   0   0 -13    1.30    1.60
   0   0 -13   -0.20    1.30
   0   0  13    1.70    1.00
   0   0  13   -0.50    0.80
  -1   0  13    2.10    0.60
  -1   0  13    1.70    0.50
   1   0  13    3.10    1.50
   1   0  13    2.90    1.60
  -1   0  13    0.80    1.40
  -1   0  13    4.50    2.10
   1   0  13    4.80    2.60
  -1   0 -13    1.70    2.00
  -1   0  13    1.40    1.30
  -1   0 -13    1.20    1.40
  -2   0 -13    8.70    1.80
   2   0  13   10.80    2.80
   2   0  13   10.30    2.60
  -2   0  13    9.10    2.50
  -2   0 -13   13.40    3.40
  -2   0  13   12.60    2.60
  -2   0 -13    9.20    2.40
  -2   0  13   11.50    1.60
   2   0  13    7.80    2.90
  -2   0  13   10.00    1.40
  -2   0  13   11.30    1.40
  -3   0  13  166.98    8.20
  -3   0 -13  150.08    9.00
   3   0  13  160.78   10.10
  -3   0  13  166.88    8.20
  -3   0  13  155.38    6.80
  -3   0 -13  158.58    9.70
   3   0  13  154.98    9.90
  -3   0  13  159.18    8.60
   3   0  13  168.28   11.20
  -3   0 -13  161.78   10.90
  -4   0  13  731.73   30.30
  -4   0 -13  683.23   31.80
   4   0  13  694.23   32.40
  -4   0  13  670.53   30.10
  -4   0 -13  707.43   33.10
  -4   0  13  738.43   28.80
   4   0  13  695.33   33.00
  -5   0 -13  298.47   18.60
   5   0  13  313.17   18.20
   5   0  13  321.87   18.20
  -5   0 -13  320.87   17.70
  -5   0  13  322.87   16.50
   6   0  13  107.69   11.00
   6   0  13  116.79   11.70
  -6   0 -13  112.99   11.40
  -6   0 -13   90.99   10.80
  -6   0  13   97.09    8.50
   7   0  13   55.09    8.30
  -7   0  13   66.79    8.40
  -7   0 -13   81.99   10.20
   7   0  13   82.19   10.10
  -7   0 -13   54.69    9.00
   0   1  13  749.92   30.50
   0  -1  13  762.12   30.00
   0  -1  13  798.72   32.10
   0   1  13  791.92   31.30
   0   1 -13  736.53   31.80
   0  -1  13  747.73   31.90
   0  -1 -13  729.53   31.00
   0  -1  13  726.23   29.90
   0   1  13  707.43   30.30
   0   1 -13  728.63   31.80
   0   1  13  708.03   32.60
  -1   1  13  178.48    8.30
   1  -1  13  158.28    8.90
   1  -1  13  187.08   10.10
   1  -1  13  177.78    9.10
  -1   1  13  173.58   10.20
  -1   1  13  177.58    8.50
  -1   1  13  178.58    8.50
  -1  -1 -13  180.78    8.20
  -1  -1 -13  164.88    9.80
  -1   1  13  170.48    8.20
   1   1  13  176.08    9.40
  -1  -1  13  178.28   10.10
   1  -1 -13  185.08    8.40
  -1   1 -13  174.48   10.40
   1   1  13  163.08    9.10
  -1  -1  13  173.48    7.30
  -1  -1  13  190.48    9.60
  -1   1 -13  184.28   10.00
   1   1  13  162.88   10.80
  -1  -1  13  184.28    7.30
   1   1  13  211.68   11.50
   2  -1  13   73.59    5.70
  -2   1  13   70.29    5.40
  -2   1  13   72.99    5.10
   2  -1  13   71.39    5.60
  -2   1  13   71.59    4.40
  -2   1  13   68.49    4.50
  -2  -1 -13   71.09    6.90
  -2  -1 -13   76.89    4.90
  -2  -1 -13   67.99    4.80
  -2   1 -13   76.99    4.50
  -2  -1  13   75.49    3.80
  -2   1 -13   69.89    7.30
   2   1  13   60.49    6.00
  -2  -1  13   74.09    4.90
   2   1  13   75.89    5.90
  -2   1 -13   80.19    6.30
  -2  -1  13   75.89    3.80
   2   1  13   77.69    7.80
  -3   1  13  313.77   15.20
   3  -1  13  331.97   16.00
  -3   1  13  314.57   13.90
  -3  -1 -13  294.17   14.60
  -3   1  13  304.67   14.00
   3  -1  13  276.47   15.20
  -3  -1 -13  284.87   16.20
  -3   1  13  301.37   13.80
  -3  -1 -13  294.17   14.50
  -3  -1  13  290.87   13.30
  -3  -1  13  263.37   13.20
  -3   1 -13  265.67   16.10
  -3  -1  13  300.57   13.40
  -3  -1  13  305.17   14.10
   3   1  13  296.87   15.70
  -3   1 -13  311.87   15.80
   3   1  13  267.37   16.10
  -3   1 -13  285.47   14.30
   3   1  13  293.07   15.60
  -4   1  13   11.00    2.90
  -4   1  13   11.20    2.70
  -4  -1 -13   10.10    3.10
   4  -1  13   16.20    4.10
  -4   1  13    9.70    2.00
   4  -1  13   16.70    4.40
  -4  -1 -13   18.10    4.60
  -4  -1  13    9.90    2.40
   4   1  13   11.60    3.70
  -4   1 -13   10.60    4.10
  -4  -1  13    6.30    2.30
  -4  -1  13   17.10    2.30
  -4   1 -13   10.60    3.50
   4   1  13    6.10    3.70
   5  -1  13   11.80    4.30
  -5   1  13   13.60    3.60
  -5  -1 -13   23.20    5.20
   5  -1  13   15.70    4.20
  -5  -1 -13   17.70    4.60
  -5   1 -13   17.30    5.20
   5   1  13   22.20    5.10
  -5  -1  13    9.60    3.10
  -5   1 -13    6.60    3.70
   5   1  13   18.10    4.90
  -6  -1 -13  234.18   16.00
  -6  -1 -13  231.68   15.20
  -6   1  13  251.87   14.70
   6  -1  13  216.68   15.60
   6  -1  13  223.28   15.20
  -6   1 -13  256.27   16.40
  -6   1 -13  250.47   16.80
   6   1  13  237.18   15.50
   6   1  13  247.08   16.20
  -6  -1  13  238.28   14.20
   7  -1  13   64.79    8.80
  -7  -1 -13   64.99    9.90
  -7   1  13   64.39    8.40
   7  -1  13   63.69    9.30
  -7  -1 -13   65.79    9.30
   7   1  13   54.99    8.30
  -7   1 -13   61.79    9.80
  -7  -1  13   57.49    7.70
   7   1  13   64.29    9.40
  -7   1 -13   69.79    9.80
   0   2  13   18.40    2.80
   0  -2  13   15.70    2.20
   0   2  13   22.60    4.10
   0  -2  13   18.30    2.40
   0  -2 -13   21.40    2.90
   0   2 -13   13.20    3.30
   0   2  13   17.60    2.80
  -1  -2 -13  669.33   27.00
   1  -2  13  700.83   28.20
  -1   2  13  664.73   27.80
  -1   2  13  664.63   27.80
  -1  -2 -13  646.94   28.80
   1   2 -13  639.04   29.70
  -1   2  13  669.63   29.50
   1  -2  13  658.43   28.00
   1   2  13  650.43   28.50
  -1  -2  13  632.44   26.70
   1   2  13  665.63   30.20
   1  -2 -13  665.13   26.70
  -1   2 -13  670.63   29.60
  -1  -2  13  627.54   26.70
   1   2  13  698.53   28.80
  -1   2 -13  666.53   29.90
  -2   2  13   97.59    6.90
  -2  -2 -13  100.29    6.40
  -2   2  13   95.19    6.30
  -2   2  13  105.79    6.40
   2  -2  13  100.39    7.10
  -2  -2 -13  101.49    7.70
  -2  -2 -13   95.69    5.30
  -2   2  13  111.99    6.10
  -2   2 -13  103.79    8.30
  -2   2 -13   97.59    7.80
   2   2  13   95.89    7.20
   2   2  13   98.19    7.40
  -2   2 -13  109.09    5.90
  -2  -2  13   98.99    5.50
   2   2  13   88.09    8.80
  -2  -2  13  112.09    5.60
  -2  -2  13  114.29    7.00
   3  -2  13 1443.86   62.09
  -3  -2 -13 1577.24   61.89
   3  -2  13 1441.16   62.29
  -3  -2 -13 1473.95   63.09
  -3   2  13 1616.14   61.09
  -3   2  13 1456.15   60.79
  -3  -2 -13 1523.05   60.39
  -3   2  13 1513.95   60.69
  -3  -2  13 1538.45   60.09
   3   2  13 1635.94   62.99
  -3   2 -13 1485.25   60.89
   3   2  13 1402.16   63.29
  -3   2 -13 1507.85   63.19
  -3  -2  13 1484.25   60.09
  -3   2 -13 1489.75   63.69
   3   2  13 1457.25   62.59
  -3  -2  13 1479.85   60.69
  -4   2  13   46.60    5.30
   4  -2  13   40.10    5.90
  -4  -2 -13   46.80    5.40
  -4   2  13   52.29    4.00
  -4   2  13   43.40    5.20
  -4  -2 -13   47.00    6.80
  -4  -2  13   40.80    4.70
  -4   2 -13   35.20    6.20
   4   2  13   33.90    5.80
   4   2  13   38.70    6.40
  -4   2 -13   42.90    6.50
  -4  -2  13   43.50    4.80
  -5  -2 -13   75.39    7.90
  -5   2  13   78.29    7.80
  -5  -2 -13   81.39    9.50
   5  -2  13   83.79    9.30
  -5   2 -13   86.09    9.80
  -5  -2  13   86.59    7.10
   5   2  13   70.19    8.80
  -5   2 -13   96.09   10.70
   5   2  13   92.59    9.90
  -6   2  13    5.90    3.20
   6  -2  13    9.70    4.20
  -6  -2 -13    2.90    4.00
   6  -2  13    6.20    4.00
  -6  -2  13    5.40    3.10
  -6   2 -13    5.30    4.10
   6   2  13   10.10    4.50
  -6   2 -13    3.50    4.10
   6   2  13    4.40    3.70
   7  -2  13  444.06   24.70
  -7  -2 -13  501.85   27.20
  -7   2  13  408.06   23.80
   7  -2  13  440.86   25.80
  -7   2 -13  460.15   26.50
   7   2  13  490.45   26.70
  -7   2 -13  453.85   26.60
   7   2  13  449.06   25.10
  -7  -2  13  462.35   24.20
   0  -3 -13  142.89    7.90
   0  -3  13  141.29    7.90
   0   3 -13  126.99    9.40
   0   3  13  138.09    8.50
   0  -3  13  121.49    7.50
   0  -3 -13  138.49    7.00
   0   3  13  132.89    8.40
   0   3  13  152.98    9.70
  -1   3  13   15.00    3.00
  -1   3  13    9.20    3.00
  -1  -3 -13   14.80    2.60
  -1  -3 -13   13.30    3.00
  -1   3  13   10.80    2.70
   1   3 -13   12.00    3.70
   1  -3  13   12.90    2.80
   1  -3  13   15.70    3.00
  -1  -3  13   12.40    2.40
   1  -3 -13   14.40    2.00
  -1   3 -13   10.50    3.50
  -1   3 -13   14.60    1.60
  -1  -3  13   13.10    2.40
   1   3  13   11.00    3.00
   1   3  13   16.50    3.50
   1   3  13   11.20    3.60
  -2  -3 -13   35.40    4.30
  -2  -3 -13   35.30    1.80
   2  -3  13   36.60    4.80
  -2  -3 -13   39.20    1.80
  -2   3  13   37.70    3.10
  -2   3  13   35.20    4.40
   2  -3  13   38.80    4.80
  -2   3  13   41.10    4.90
  -2   3  13   34.10    4.40
  -2  -3 -13   40.30    5.40
   2   3  13   38.70    5.20
  -2  -3  13   38.50    3.90
   2   3  13   42.10    6.00
  -2   3 -13   33.60    5.60
   2   3  13   33.40    4.90
  -2   3 -13   35.70    3.80
  -2  -3  13   33.40    3.70
  -2   3 -13   36.90    5.60
  -3  -3 -13  293.17   17.00
   3  -3  13  312.27   16.90
  -3  -3 -13  322.07   14.50
  -3   3  13  337.57   15.80
   3  -3  13  313.37   17.40
  -3   3  13  339.17   16.20
  -3   3  13  302.97   15.90
  -3  -3  13  307.17   15.10
  -3   3 -13  316.67   18.00
   3   3  13  303.77   17.90
   3   3  13  299.87   17.10
  -3  -3  13  328.67   15.20
  -3   3 -13  337.67   18.30
  -4   3  13  100.09    8.20
   4  -3  13  100.09    8.90
  -4  -3 -13  112.29   10.70
  -4   3  13  116.79    7.10
   4   3  13  101.29   10.40
  -4  -3  13  118.69    8.90
  -4  -3  13  130.29    8.10
   4   3  13  108.89    9.40
  -4   3 -13  102.29   10.80
  -4   3 -13  114.59   10.00
   5  -3  13  110.49   11.20
  -5   3  13  131.89    9.90
  -5  -3 -13  128.09   12.30
   5   3  13  138.49   11.20
  -5   3 -13  120.69   10.60
   5   3  13  114.19   11.70
  -5   3 -13  136.19   12.90
  -5  -3  13  122.39    9.20
  -6   3  13   98.59   10.10
  -6  -3 -13  116.39   12.60
   6  -3  13  128.59   12.50
  -6   3 -13  117.99   12.80
  -6   3 -13   95.09   11.50
  -6  -3  13  119.39    9.70
   6   3  13  125.29   12.80
   6   3  13  116.19   11.90
   7  -3  13   99.99   12.00
   7  -3  13  105.49   11.60
  -7  -3 -13  120.59   13.20
   7   3  13  102.19   12.40
  -7   3 -13  100.09   12.80
  -7   3 -13  107.39   13.00
   7   3  13  115.49   12.10
   0  -4  13  253.27   13.10
   0   4  13  261.37   14.00
   0   4  13  226.58   14.20
   0  -4 -13  263.27   12.60
   0   4  13  248.88   13.80
   0   4 -13  238.98   14.90
   0  -4  13  252.97   13.10
   0  -4 -13  256.37   12.80
  -1  -4 -13   25.10    4.30
  -1   4  13   33.20    5.10
  -1   4  13   26.80    4.30
   1   4 -13   31.10    5.70
   1  -4  13   29.60    4.30
  -1   4  13   27.50    4.30
   1  -4  13   22.60    3.90
   1  -4 -13   34.00    3.40
   1   4  13   35.20    5.80
   1  -4 -13   33.50    3.70
   1   4  13   26.40    4.60
  -1  -4  13   26.10    3.70
  -1   4 -13   32.30    3.20
  -1   4 -13   26.10    5.20
  -1  -4  13   28.10    3.90
   1   4  13   27.20    4.50
  -2  -4 -13   34.80    5.30
  -2   4  13   35.60    5.10
  -2   4  13   37.20    3.00
   2  -4  13   39.30    5.30
   2  -4  13   39.60    5.50
  -2   4  13   37.40    5.20
  -2   4  13   38.50    5.10
  -2  -4  13   35.20    4.40
   2   4  13   50.99    6.90
  -2   4 -13   38.10    6.30
   2   4  13   38.90    5.70
  -2  -4  13   45.50    4.60
  -3   4  13  348.17   18.30
  -3   4  13  338.37   17.50
   3  -4  13  352.86   19.00
  -3   4  13  373.06   16.90
  -3  -4 -13  336.57   19.00
  -3  -4  13  362.36   17.30
   3   4  13  366.86   20.10
  -3   4 -13  372.96   20.40
  -3   4 -13  323.27   19.80
  -3  -4  13  346.67   17.30
   3   4  13  369.66   19.60
  -4   4  13  311.87   16.10
  -4   4  13  300.47   15.20
  -4   4  13  299.17   16.70
  -4  -4 -13  307.27   17.90
  -4  -4  13  270.17   15.70
   4   4  13  342.77   18.70
   4   4  13  288.17   18.00
  -4   4 -13  312.67   18.80
  -4   4 -13  310.67   18.90
   5  -4  13   46.90    7.40
  -5  -4 -13   52.39    8.00
  -5   4  13   54.69    7.20
  -5   4  13   57.19    7.40
   5   4  13   50.49    7.90
  -5  -4  13   50.69    6.60
  -5   4 -13   57.09    8.90
  -5   4 -13   45.20    8.00
   5   4  13   62.69    8.20
  -6   4  13   13.10    4.90
  -6  -4 -13   21.40    6.10
  -6   4  13   26.40    6.00
   6  -4  13   21.80    6.00
  -6  -4  13   33.20    5.90
  -6   4 -13   22.90    6.70
   6   4  13   36.00    7.00
   6   4  13   30.00    6.80
  -6   4 -13   18.60    6.30
   0   5 -13  326.87   18.60
   0  -5 -13  308.37   15.40
   0   5  13  276.97   16.50
   0  -5  13  312.97   16.20
   0   5  13  320.87   17.70
  -1   5  13  169.38   11.10
  -1  -5 -13  173.48   10.50
  -1   5  13  172.28   11.50
   1  -5  13  156.78   10.60
   1   5 -13  152.78   12.20
   1   5  13  166.78   11.60
  -1  -5  13  161.48   10.20
   1  -5 -13  174.58    9.10
   1   5  13  158.18   11.10
  -1   5 -13  139.29   11.70
  -2  -5 -13   89.09    8.60
   2  -5  13   77.99    8.10
  -2   5  13   82.99    8.50
  -2   5  13   83.29    8.30
   2   5  13   69.39    8.50
  -2  -5  13   81.59    6.90
   2   5  13   84.09    8.90
  -2   5 -13   75.19    9.30
   3  -5  13  491.15   24.90
  -3   5  13  497.55   23.80
  -3  -5 -13  484.25   25.00
  -3   5  13  476.95   24.50
   3   5  13  487.95   25.40
  -3  -5  13  474.05   23.40
   3   5  13  540.45   26.50
  -3   5 -13  487.75   26.40
  -4   5  13   21.80    4.90
  -4  -5 -13    8.80    4.40
  -4   5  13   15.20    3.70
   4  -5  13   17.40    5.10
  -4  -5  13   16.20    4.20
  -4   5 -13   16.30    4.90
  -4   5 -13   11.20    5.10
   4   5  13    5.00    4.00
   4   5  13   10.00    4.60
  -5  -5 -13  111.09   12.00
  -5   5  13  110.89   11.00
   5  -5  13  110.39   11.80
  -5   5 -13  100.19   12.00
   5   5  13  118.79   12.50
  -5   5 -13   87.49   11.10
   5   5  13  130.29   13.00
  -5  -5  13  127.29   10.20
   6  -5  13   34.80    7.30
  -6  -5 -13   18.10    6.10
  -6   5 -13   31.90    8.00
   6   5  13   39.70    7.70
   6   5  13   41.20    8.30
  -6   5 -13   25.30    7.20
   0   6  13   15.70    4.50
   0   6 -13    5.00    4.00
   0   6  13    4.60    3.80
   0  -6  13    5.10    3.10
   0  -6 -13   11.90    3.30
  -1   6  13  127.69   10.30
   1   6 -13  105.69   11.90
  -1   6  13  125.59   10.20
   1  -6  13  127.59    9.90
  -1  -6 -13  131.09    9.60
  -1   6 -13  113.99   12.30
   1   6  13  141.69   10.90
  -1  -6  13  131.59    9.50
   1   6  13  156.18   11.70
  -2  -6 -13  133.69   10.40
   2  -6  13  149.49   11.30
  -2   6  13  152.28   11.30
  -2   6  13  136.79   10.80
  -2  -6  13  136.09   10.20
   2   6  13  137.99   13.20
  -2   6 -13  150.68   12.50
   2   6  13  136.99   11.30
   3  -6  13  500.45   26.20
  -3   6  13  526.45   25.30
  -3  -6 -13  501.05   26.10
  -3   6  13  485.15   26.00
  -3   6 -13  513.15   28.10
   3   6  13  525.85   27.50
   3   6  13  536.55   27.30
  -3  -6  13  485.05   24.90
  -4   6  13  254.47   14.90
  -4   6  13  261.57   16.60
  -4  -6 -13  253.77   16.90
   4  -6  13  228.98   16.30
  -4  -6  13  250.37   15.60
   4   6  13  266.87   17.20
  -4   6 -13  246.48   18.10
   4   6  13  264.77   17.50
  -5   6  13   49.30    7.90
  -5  -6 -13   36.20    7.30
   5  -6  13   43.50    7.70
  -5   6 -13   36.90    8.30
   5   6  13   41.10    8.00
   5   6  13   30.10    7.50
  -5  -6  13   41.40    7.00
   0   7  13   82.39    9.80
   0   7  13   81.59    9.70
   0  -7 -13   74.59    7.90
   0   7 -13   89.59   11.10
   0  -7  13   69.89    8.50
   1  -7  13   25.40    5.40
  -1   7  13   21.50    5.20
  -1  -7 -13   24.00    5.10
  -1   7  13   15.20    4.90
   1   7 -13   20.00    6.30
  -1  -7  13   20.60    5.20
   1   7  13   31.90    6.40
  -1   7 -13   19.20    6.20
   1   7  13   30.10    6.50
  -2   7  13  148.99   12.50
  -2  -7 -13  175.18   12.30
  -2   7  13  195.88   13.00
   2  -7  13  157.48   12.60
   2   7  13  166.28   13.50
   2   7  13  187.18   13.90
  -2  -7  13  172.58   12.40
  -2   7 -13  166.88   14.00
  -3   7  13  180.38   13.80
  -3  -7 -13  176.28   13.20
  -3   7  13  195.58   13.00
   3  -7  13  167.58   13.40
   3   7  13  144.09   14.60
  -3  -7  13  176.18   12.80
  -3   7 -13  195.08   15.60
   3   7  13  179.48   14.20
  -4   7  13   34.20    6.90
  -4  -7 -13   39.60    7.50
   4  -7  13   26.20    6.60
  -4   7 -13   51.89    9.60
  -4  -7  13   38.40    7.70
   4   7  13   19.60    6.50
   4   7  13   22.10    6.20
   0   8  13    8.70    4.90
   0   8 -13   13.50    5.90
   0   8  13    7.60    4.60
   0  -8  13    7.30    4.30
  -1   8  13   22.50    6.20
   1  -8  13   35.20    6.90
   1   8 -13   26.60    7.60
  -1   8  13   34.70    7.10
  -1  -8 -13   35.40    6.30
   1   8  13   20.40    6.20
  -1  -8  13   30.30    6.10
  -1   8 -13   18.50    5.90
   1   8  13   17.80    6.00
  -2  -8 -13   78.79    9.80
  -2   8  13   96.09   10.80
  -2   8  13   81.69   10.60
   2  -8  13   82.69   10.20
  -2  -8  13   83.49   10.10
   2   8  13  113.29   12.70
  -2   8 -13  106.19   13.00
   2   8  13  106.89   12.30
   0   0  14   64.99    5.20
   0   0  14   63.09    3.80
   0   0  14   63.99    4.60
   0   0 -14   54.99    4.80
   0   0  14   66.89    6.70
   0   0  14   65.39    3.80
   1   0  14  228.78   13.50
  -1   0  14  242.28   11.30
  -1   0  14  221.18   12.50
  -1   0  14  242.28   11.70
  -1   0  14  236.08    9.60
   1   0  14  225.68   11.30
  -1   0  14  227.68    9.60
  -1   0 -14  231.28   12.60
   1   0  14  246.18   11.60
  -1   0 -14  241.38   11.50
  -2   0 -14  638.94   27.50
  -2   0  14  619.64   25.40
   2   0  14  683.03   28.20
  -2   0  14  630.74   25.40
  -2   0  14  658.63   27.90
   2   0  14  618.34   29.60
  -2   0 -14  639.74   25.90
  -2   0  14  647.54   26.00
  -2   0  14  650.63   28.00
   2   0  14  624.84   27.90
  -2   0 -14  592.14   28.80
   3   0  14 1844.12   75.79
   3   0  14 1902.91   75.89
   3   0  14 1883.61   77.29
  -3   0  14 1822.72   73.99
  -3   0  14 1883.91   71.49
  -3   0  14 1851.11   73.09
  -3   0  14 1824.42   73.09
  -3   0 -14 1874.61   75.19
  -3   0 -14 1804.12   76.59
  -4   0  14  112.19    6.30
   4   0  14  106.99    8.80
  -4   0 -14  134.59   10.00
  -4   0 -14  102.89    8.40
  -4   0  14  109.29    7.10
  -4   0  14  116.29    7.30
   4   0  14  115.49   10.80
  -5   0 -14   11.90    4.70
  -5   0 -14   18.60    4.40
  -5   0  14   12.10    3.20
   5   0  14   12.90    4.30
   5   0  14   11.80    4.50
  -6   0 -14    1.40    3.90
  -6   0 -14    4.70    3.60
  -6   0  14   -0.40    2.50
   6   0  14    4.40    3.50
   6   0  14    3.60    3.70
  -7   0 -14   23.80    6.10
  -7   0  14   27.10    5.50
   7   0  14   21.10    5.90
   7   0  14   19.70    6.10
  -7   0 -14   21.60    6.70
   0   1  14   14.50    3.50
   0  -1  14   18.50    3.20
   0  -1  14   17.60    2.10
   0   1  14   15.60    2.20
   0   1 -14   17.50    3.10
   0  -1 -14   17.80    2.90
   0   1  14   17.50    2.90
   0   1 -14   24.90    3.70
   0   1  14   17.50    2.40
  -1   1  14   20.10    2.20
   1  -1  14   16.90    3.30
   1  -1  14   17.40    2.70
  -1  -1 -14   18.40    2.10
  -1   1  14   17.90    3.50
  -1  -1 -14   21.80    3.50
   1  -1  14   22.20    3.00
  -1   1  14   17.10    2.30
  -1   1  14   20.30    2.30
   1   1  14   22.10    3.10
   1   1  14   17.50    2.90
  -1  -1  14   23.30    3.60
  -1  -1  14   21.40    1.40
  -1  -1  14   25.60    3.50
  -1   1 -14   16.60    3.20
  -1   1 -14   24.00    4.00
  -1  -1  14   19.40    1.30
   1   1  14   19.80    4.20
  -2  -1 -14  928.91   38.70
   2  -1  14  913.01   39.90
  -2   1  14  935.31   40.10
   2  -1  14  962.60   40.10
  -2   1  14  951.60   38.30
  -2   1  14  936.21   38.30
  -2  -1 -14  908.21   41.00
  -2  -1 -14  953.20   38.50
  -2   1  14  972.00   39.30
  -2  -1  14  985.30   40.30
  -2   1 -14  966.30   41.60
  -2  -1  14  951.90   37.40
   2   1  14  934.91   42.10
  -2  -1  14 1015.90   39.20
  -2   1 -14  980.40   37.90
  -2   1 -14  929.21   40.40
  -2  -1  14  933.51   37.40
   2   1  14  933.61   40.30
   2   1  14 1018.60   40.60
   3  -1  14  351.26   18.40
  -3   1  14  429.96   19.50
  -3  -1 -14  363.36   19.40
   3  -1  14  372.06   18.60
  -3  -1 -14  367.26   17.30
  -3   1  14  356.96   17.00
  -3   1  14  375.66   16.60
  -3   1  14  382.96   16.60
  -3  -1  14  346.77   16.10
  -3   1 -14  379.26   18.80
  -3  -1  14  369.66   16.00
   3   1  14  372.06   18.70
  -3  -1  14  355.36   17.00
  -3   1 -14  372.16   19.50
  -3  -1  14  372.06   16.10
   3   1  14  334.97   19.60
   3   1  14  350.06   18.50
  -4   1  14   77.09    5.90
   4  -1  14   74.79    8.10
  -4   1  14   69.79    5.70
  -4  -1 -14   67.29    7.00
  -4   1  14   68.89    4.80
   4  -1  14   74.09    8.50
  -4  -1 -14   59.49    7.90
  -4   1 -14   77.99    9.00
  -4  -1  14   78.79    5.10
   4   1  14   77.49    8.20
   4   1  14   71.49    8.30
  -4  -1  14   79.69    5.70
  -4   1 -14   76.09    8.00
  -4  -1  14   77.49    5.60
  -5  -1 -14   17.30    4.60
  -5   1  14   28.40    4.50
   5  -1  14   19.00    5.00
   5  -1  14   21.40    5.00
  -5  -1 -14   35.30    6.30
   5   1  14   24.60    5.40
  -5  -1  14   34.50    4.70
  -5   1 -14   17.60    4.90
   5   1  14   29.40    5.60
  -5   1 -14   28.50    5.90
  -6   1  14  148.49   11.10
  -6  -1 -14  164.88   12.10
   6  -1  14  188.68   13.50
  -6  -1 -14  167.68   13.60
   6  -1  14  152.68   12.40
  -6  -1  14  166.08   11.10
   6   1  14  154.38   12.70
   6   1  14  160.88   12.70
  -6   1 -14  157.18   12.90
  -6   1 -14  159.68   15.10
   7  -1  14   21.20    6.20
   7  -1  14   18.10    5.60
  -7  -1 -14   19.60    6.00
  -7  -1 -14   21.20    5.90
   7   1  14   18.60    5.80
   7   1  14   14.50    5.20
  -7   1 -14   25.10    6.50
  -7   1 -14   13.80    5.10
   0   2  14   11.80    3.40
   0   2  14   15.80    2.80
   0  -2  14   18.50    2.40
   0   2 -14   15.50    3.60
   0  -2  14   17.70    2.40
   0  -2 -14   16.70    2.80
   0   2  14   21.20    3.00
   1  -2  14  258.37   13.30
  -1   2  14  275.57   14.80
  -1   2  14  269.67   13.10
  -1   2  14  270.47   13.20
  -1  -2 -14  278.47   14.30
   1  -2  14  295.37   13.70
  -1  -2 -14  285.67   11.90
   1  -2 -14  292.87   12.30
  -1   2 -14  288.47   15.00
   1   2  14  276.17   14.00
   1   2  14  274.97   15.50
   1   2  14  287.37   14.10
  -1  -2  14  279.47   12.20
  -1  -2  14  289.17   12.20
  -1   2 -14  267.07   15.10
  -2   2  14   49.60    3.90
  -2   2  14   53.89    4.40
  -2   2  14   55.09    4.50
  -2   2  14   59.59    5.80
   2  -2  14   45.80    5.20
  -2  -2 -14   44.20    5.80
   2  -2  14   53.69    5.60
  -2  -2 -14   52.19    3.20
  -2  -2 -14   53.39    4.40
   2   2  14   47.00    5.40
  -2  -2  14   62.59    5.70
   2   2  14   57.49    5.90
  -2  -2  14   50.99    3.60
  -2   2 -14   67.29    7.30
  -2   2 -14   64.99    3.90
   2   2  14   70.29    7.60
  -2  -2  14   58.09    3.60
  -2   2 -14   47.70    6.10
  -3   2  14  250.47   12.40
  -3  -2 -14  236.08   11.70
  -3   2  14  242.78   12.40
   3  -2  14  224.78   13.40
  -3   2  14  235.58   12.30
  -3  -2 -14  252.77   14.50
   3  -2  14  249.38   13.90
   3   2  14  230.98   14.60
   3   2  14  246.68   14.10
  -3   2 -14  238.18   14.20
  -3  -2  14  233.38   11.50
  -3   2 -14  240.88   14.80
  -3  -2  14  233.58   11.40
   3   2  14  244.58   15.50
  -3  -2  14  254.07   12.40
  -4  -2 -14  505.55   23.10
  -4  -2 -14  501.75   25.40
   4  -2  14  470.25   24.60
  -4   2  14  505.05   21.80
  -4   2  14  499.85   23.20
   4   2  14  530.55   26.10
  -4   2 -14  490.95   25.90
  -4   2 -14  513.35   25.50
   4   2  14  513.05   25.20
  -4  -2  14  490.15   22.40
  -4  -2  14  500.45   22.50
   5  -2  14  270.97   16.90
  -5   2  14  263.47   15.30
  -5  -2 -14  293.87   15.80
  -5  -2 -14  291.77   17.60
   5   2  14  293.27   17.50
   5   2  14  291.97   17.60
  -5   2 -14  260.67   17.70
  -5   2 -14  299.17   17.80
  -5  -2  14  285.17   15.10
  -6   2  14   75.69    8.30
   6  -2  14   78.29    9.60
  -6  -2 -14   70.99    9.80
  -6  -2 -14   60.79    8.90
   6  -2  14   69.09    9.00
  -6  -2  14   62.89    7.40
   6   2  14   70.99    9.40
  -6   2 -14   53.49    9.00
   6   2  14   56.19    8.60
  -6   2 -14   75.19    9.90
   7  -2  14  135.19   14.00
  -7  -2 -14  141.69   15.00
   7  -2  14  122.69   12.70
  -7   2 -14  153.28   15.80
   7   2  14  148.39   14.90
   7   2  14  146.89   14.10
  -7   2 -14  159.68   15.50
   0  -3  14    9.20    2.30
   0  -3  14    7.20    2.10
   0  -3 -14    8.20    2.30
   0   3  14    8.90    2.70
   0   3 -14    5.40    3.20
   0   3  14    8.80    3.20
   0  -3 -14    9.90    1.50
   0   3  14   14.40    3.00
  -1   3  14  248.88   13.10
   1  -3  14  248.88   13.10
  -1   3  14  254.87   14.30
   1   3 -14  240.08   14.70
  -1   3  14  246.78   13.10
  -1  -3 -14  250.77   13.50
  -1  -3 -14  275.97   12.40
   1  -3  14  254.77   13.20
  -1  -3  14  267.37   12.30
  -1  -3  14  252.37   12.20
   1   3  14  280.67   15.30
  -1   3 -14  249.97   14.70
   1   3  14  268.37   13.90
   1   3  14  269.87   14.00
   1  -3 -14  264.27   11.60
   2  -3  14   29.10    4.50
  -2   3  14   25.30    4.00
  -2  -3 -14   35.10    5.10
   2  -3  14   32.20    4.70
  -2   3  14   37.50    3.10
  -2   3  14   28.80    4.40
  -2   3  14   30.30    4.10
  -2   3  14   29.20    2.60
  -2  -3  14   26.80    3.30
  -2   3 -14   36.70    5.90
  -2   3 -14   30.90    5.30
   2   3  14   27.70    4.70
  -2  -3  14   27.80    3.30
   2   3  14   29.00    4.80
   2   3  14   25.80    5.30
  -3  -3 -14  277.57   16.00
  -3   3  14  289.17   14.60
  -3   3  14  259.47   14.20
  -3   3  14  288.17   14.40
  -3  -3  14  279.37   13.50
   3   3  14  278.97   15.80
   3   3  14  261.37   16.30
  -3  -3  14  280.47   13.60
  -3   3 -14  263.17   16.20
  -3   3 -14  271.17   16.30
  -4   3  14   17.50    3.30
  -4   3  14   15.30    3.80
  -4  -3 -14   16.40    4.30
   4  -3  14   17.00    4.40
   4   3  14   19.90    5.00
  -4   3 -14   18.20    5.10
   4   3  14   15.80    4.90
  -4   3 -14   20.30    5.40
  -4  -3  14   16.70    3.50
  -5   3  14   27.80    5.00
   5  -3  14   24.70    5.70
  -5  -3 -14   20.30    5.80
   5   3  14   29.20    6.20
  -5   3 -14   46.00    7.30
  -5   3 -14   41.00    7.30
  -5  -3  14   38.80    5.50
   5   3  14   35.10    6.70
  -6   3  14   59.39    7.70
  -6  -3 -14   49.50    8.70
   6  -3  14   61.79    9.00
   6   3  14   63.49    9.10
  -6  -3  14   77.79    8.30
  -6   3 -14   79.59   10.40
   6   3  14   54.69    9.00
  -6   3 -14   62.09    9.60
   0  -4 -14   20.70    3.30
   0   4  14   13.00    3.70
   0   4 -14   13.10    4.00
   0  -4  14   16.60    3.20
   0  -4  14   13.30    3.00
   0   4  14   23.30    4.80
   0   4  14   17.30    3.50
  -1   4  14  102.49    7.70
   1   4 -14   92.49    9.70
  -1   4  14   94.49    8.90
   1  -4  14   85.29    7.10
  -1  -4 -14  104.59    7.60
   1  -4  14   98.59    7.40
  -1   4  14   80.19    7.20
   1  -4 -14  105.09    5.90
  -1  -4  14   89.79    6.60
   1   4  14  103.59    7.90
   1   4  14   99.89    9.80
  -1  -4  14  110.09    7.10
  -1   4 -14   93.59    9.60
  -2  -4 -14   98.79    8.10
   2  -4  14   91.59    7.60
  -2   4  14   94.49    7.50
  -2   4  14   77.69    8.00
  -2   4 -14   91.29    9.60
  -2  -4  14   78.89    6.40
   2   4  14   96.19    9.00
  -2  -4  14   88.29    6.40
   2   4  14   88.49    9.50
  -3   4  14  291.17   15.20
  -3  -4 -14  287.07   16.60
  -3   4  14  310.77   16.00
   3  -4  14  257.27   15.90
  -3   4 -14  282.57   17.40
   3   4  14  278.67   16.60
  -3   4 -14  285.67   17.20
  -3  -4  14  282.77   14.50
   3   4  14  268.87   17.20
  -4   4  14  124.49   13.50
  -4   4  14  122.09    8.20
  -4   4  14  127.49    9.70
  -4  -4 -14  128.79   12.00
  -4   4 -14  104.99   11.60
  -4  -4  14  121.49    8.80
   4   4  14  115.89   12.00
  -4   4 -14  112.19   11.90
   4   4  14  147.69   11.30
   5  -4  14    5.30    4.00
  -5  -4 -14    6.40    4.10
  -5   4  14    2.60    3.30
   5   4  14   -2.30    3.30
  -5   4 -14    1.30    3.90
   5   4  14    7.30    4.30
  -5   4 -14   -2.00    3.50
  -5  -4  14    1.80    2.90
  -6   4  14   19.20    5.50
   6  -4  14   11.90    5.00
  -6  -4 -14   23.80    6.60
  -6   4 -14   17.20    6.00
  -6  -4  14   13.80    4.30
   6   4  14   14.70    5.40
   6   4  14   20.30    5.80
  -6   4 -14   13.80    4.90
   0  -5  14   58.79    6.40
   0   5 -14   55.99    8.00
   0   5  14   54.19    6.80
   0  -5 -14   78.39    6.20
   0   5  14   74.19    8.40
   1   5 -14  180.68   13.50
   1  -5  14  173.28   11.50
  -1   5  14  189.58   12.60
  -1   5  14  209.38   12.60
  -1  -5 -14  199.88   11.90
  -1   5 -14  199.38   13.60
   1   5  14  220.88   13.80
   1   5  14  171.18   12.10
  -1  -5  14  192.38   11.40
  -2   5  14   55.39    7.20
  -2  -5 -14   48.40    6.90
   2  -5  14   58.59    7.10
  -2   5  14   61.19    7.20
  -2  -5  14   61.09    6.30
   2   5  14   58.49    7.50
  -2   5 -14   67.69    8.50
   2   5  14   58.89    7.80
  -3  -5 -14   39.00    6.40
  -3   5  14   32.50    5.20
   3  -5  14   41.10    6.40
  -3   5  14   34.30    5.60
   3   5  14   28.50    6.00
   3   5  14   33.60    6.30
  -3  -5  14   35.00    5.20
  -3   5 -14   37.20    7.30
   4  -5  14  166.38   12.90
  -4   5  14  174.98   14.30
  -4   5  14  179.38   12.40
  -4  -5 -14  168.78   13.00
   4   5  14  173.08   13.60
  -4   5 -14  191.88   14.50
   4   5  14  176.68   13.50
  -4  -5  14  171.98   11.40
  -5   5  14   40.00    7.00
   5  -5  14   50.29    8.00
  -5  -5 -14   40.20    7.70
   5   5  14   44.50    7.60
   5   5  14   44.40    8.10
  -5   5 -14   52.29    8.90
  -5  -5  14   40.80    6.60
  -5   5 -14   50.39    8.70
   0  -6 -14  172.48   10.90
   0  -6  14  186.68   12.20
   0   6  14  205.98   13.70
   0   6 -14  188.48   14.10
   0   6  14  172.48   12.50
   1  -6  14  121.59    9.40
  -1   6  14  115.19   10.90
   1   6 -14  112.49   12.10
  -1   6  14   89.19    9.90
  -1  -6 -14   94.49    8.20
   1   6  14   90.99    9.90
  -1  -6  14  106.49    8.80
   1   6  14  127.29   11.90
  -1   6 -14  106.99   11.90
  -2   6  14  188.88   13.00
   2  -6  14  185.68   12.90
  -2   6  14  175.48   12.50
  -2  -6 -14  183.88   12.50
   2   6  14  172.98   13.30
  -2  -6  14  178.88   11.80
   2   6  14  193.88   13.60
  -2   6 -14  180.58   14.20
  -3   6  14  352.06   19.30
   3  -6  14  348.87   20.10
  -3   6  14  355.06   20.40
  -3  -6 -14  353.56   20.20
  -3  -6  14  352.46   19.10
   3   6  14  343.57   20.70
   3   6  14  397.76   22.00
  -3   6 -14  318.77   21.40
  -4   6  14  226.78   15.60
   4  -6  14  245.48   16.40
  -4  -6 -14  221.88   16.00
  -4  -6  14  223.88   14.50
  -4   6 -14  234.08   17.50
   4   6  14  224.38   16.50
   4   6  14  267.77   17.10
  -5  -6 -14  292.77   19.60
  -5   6 -14  322.87   21.00
   5   6  14  284.67   19.70
   0   7  14   58.89    8.60
   0   7 -14   78.69   10.80
   0  -7  14   72.79    8.40
   0   7  14   86.19   10.10
  -1   7  14   25.10    6.10
  -1  -7 -14   32.50    5.50
  -1   7  14   31.70    6.30
   1   7 -14   23.80    6.70
   1  -7  14   36.40    6.20
  -1   7 -14   25.60    6.70
   1   7  14   36.70    7.30
   1   7  14   25.80    5.90
  -1  -7  14   29.20    5.60
  -2   7  14  284.57   16.80
  -2  -7 -14  235.48   15.80
  -2   7  14  253.37   17.00
   2  -7  14  244.68   16.30
   2   7  14  264.67   17.70
   2   7  14  238.68   17.00
  -2  -7  14  261.87   16.00
  -2   7 -14  274.87   18.80
  -3  -7 -14  165.08   12.70
  -3   7  14  179.48   13.60
  -3   7  14  187.18   12.90
   3  -7  14  151.18   12.70
  -3   7 -14  148.89   15.70
   3   7  14  176.98   14.30
  -3  -7  14  139.69   11.70
   3   7  14  174.08   13.90
   0   8  14   70.89    9.90
   0   8  14   70.99   10.00
   0   8 -14   72.09   11.00
   0  -8  14   69.79    9.10
   1  -8  14  179.88   14.10
  -1   8  14  190.98   14.80
  -1   8  14  199.38   14.70
   1   8 -14  207.88   16.70
  -1  -8  14  184.28   15.60
   1   8  14  204.78   15.40
   1   8  14  188.18   15.10
  -1   8 -14  184.68   15.50
  -2   8  14   34.60    7.00
  -2  -8 -14   30.20    6.30
  -2   8  14   38.30    8.80
   2   8  14   42.40    8.30
  -2   8 -14   43.00    9.10
   0   0  15    3.30    2.00
   0   0  15   -1.60    1.30
   0   0  15   -0.20    2.10
   0   0  15    0.90    1.00
   0   0 -15    1.70    1.80
   0   0  15   -0.50    0.90
  -1   0  15  206.28    8.80
  -1   0 -15  211.78   10.70
  -1   0  15  221.28    8.90
   1   0  15  196.98   10.50
  -1   0  15  220.08   12.40
  -1   0  15  228.48   11.10
  -1   0  15  217.38   10.70
   1   0  15  210.78   10.70
   1   0  15  200.08   12.70
  -1   0 -15  207.98   11.90
  -2   0  15   37.80    2.40
   2   0  15   33.40    5.40
  -2   0 -15   40.30    4.50
  -2   0  15   38.00    2.40
   2   0  15   39.40    4.70
  -2   0 -15   37.70    5.40
   2   0  15   32.30    4.30
  -2   0  15   36.60    4.60
  -2   0  15   41.60    3.20
  -2   0  15   38.10    4.80
  -3   0 -15   61.29    7.30
   3   0  15   59.39    7.30
  -3   0  15   46.80    3.70
  -3   0  15   55.19    3.90
   3   0  15   58.99    6.40
  -3   0 -15   59.09    6.10
   3   0  15   42.10    5.50
  -3   0  15   57.59    5.50
  -4   0  15    6.00    2.10
   4   0  15    7.00    3.50
  -4   0  15    6.20    2.20
  -4   0 -15    5.80    3.60
  -4   0  15    6.00    2.20
   4   0  15    9.00    3.50
  -4   0 -15   11.70    3.60
  -5   0  15  349.67   17.40
   5   0  15  379.06   20.60
  -5   0 -15  337.87   18.90
  -5   0 -15  310.37   19.50
   5   0  15  350.36   19.60
  -6   0 -15   28.90    6.10
   6   0  15   37.10    7.00
  -6   0  15   30.30    5.10
  -6   0 -15   28.20    6.00
   6   0  15   24.30    5.70
  -7   0 -15  146.69   15.10
   7   0  15  150.08   14.60
  -7   0 -15  166.18   13.40
   7   0  15  191.38   14.70
   0  -1 -15   37.30    4.20
   0   1  15   41.10    4.40
   0   1  15   36.80    3.50
   0  -1  15   36.20    2.90
   0  -1  15   33.90    4.40
   0  -1  15   40.40    2.90
   0   1  15   32.40    3.40
   0   1  15   31.70    5.00
   0   1 -15   33.10    4.40
  -1   1  15  293.67   12.90
  -1  -1 -15  297.27   12.60
   1  -1  15  299.27   13.90
  -1  -1 -15  296.47   15.00
  -1   1  15  273.47   12.80
   1  -1  15  268.37   13.60
   1  -1  15  294.67   14.90
  -1   1  15  281.67   15.40
  -1   1  15  291.17   13.10
  -1  -1  15  299.37   14.40
  -1  -1  15  329.27   16.50
  -1   1 -15  305.37   14.90
  -1   1 -15  298.27   15.50
   1   1  15  280.67   14.00
  -1  -1  15  301.67   11.80
   1   1  15  303.67   16.30
   1   1  15  287.87   14.10
  -2   1  15 1166.98   47.00
  -2   1  15 1116.99   44.50
  -2  -1 -15 1179.68   44.40
   2  -1  15 1033.60   46.20
   2  -1  15 1118.59   46.50
  -2  -1 -15 1111.29   45.00
  -2   1  15 1136.29   44.60
  -2  -1 -15 1115.69   47.70
  -2   1  15 1185.48   45.70
   2   1  15 1085.09   48.70
  -2   1 -15 1059.69   46.70
  -2  -1  15 1091.59   43.50
  -2   1 -15 1111.99   48.20
   2   1  15 1104.59   46.70
  -2  -1  15 1099.39   46.70
  -2  -1  15 1114.19   43.50
  -2  -1  15 1147.29   45.50
   2   1  15 1083.09   46.60
  -3   1  15   67.89    5.40
  -3   1  15   72.19    5.00
  -3  -1 -15   65.09    5.40
  -3   1  15   69.19    4.80
   3  -1  15   57.49    7.80
   3  -1  15   71.89    8.90
  -3  -1 -15   64.49    7.70
   3  -1  15   57.69    6.60
  -3   1 -15   67.09    7.10
  -3   1 -15   66.99    7.90
   3   1  15   59.39    6.70
  -3  -1  15   78.79    5.80
  -3  -1  15   64.49    4.20
   3   1  15   59.69    7.60
  -3  -1  15   63.39    4.30
   4  -1  15  111.99   10.70
   4  -1  15  113.89    9.10
  -4  -1 -15  114.09    8.10
  -4   1  15  113.49    7.30
  -4   1  15  104.69    7.10
  -4  -1 -15  130.89    9.90
  -4   1  15  115.39    7.30
  -4  -1  15  102.39    6.80
  -4  -1  15  100.89    6.60
   4   1  15  102.29   10.60
  -4  -1  15  113.79    7.00
  -4   1 -15  114.09   11.30
  -4   1 -15   98.09    8.60
   4   1  15   90.39    9.20
   5  -1  15    8.40    4.20
  -5   1  15    3.90    2.70
  -5  -1 -15    7.00    3.50
   5  -1  15    5.60    3.50
  -5  -1 -15    8.50    4.40
  -5  -1  15    8.10    2.80
   5   1  15   13.30    4.70
  -5   1 -15   10.20    3.90
  -5   1 -15   10.80    4.80
   5   1  15    6.00    3.50
   6  -1  15  177.78   14.30
  -6  -1 -15  198.88   14.00
  -6  -1 -15  213.28   15.80
   6  -1  15  204.88   14.90
  -6   1  15  214.08   13.30
   6   1  15  232.48   15.60
  -6   1 -15  208.18   15.10
   6   1  15  225.48   15.40
  -6   1 -15  213.88   15.90
  -6  -1  15  224.58   13.20
   0   2  15  107.29    6.60
   0   2 -15  110.79    8.00
   0   2  15   90.69    6.30
   0  -2 -15   95.69    6.30
   0   2  15   93.29    8.80
   0  -2  15   93.19    5.60
   0  -2  15  104.39    5.80
   1  -2  15  130.19    7.80
  -1   2  15  135.89    7.60
   1  -2  15  130.59    7.80
  -1   2  15  139.09    9.30
  -1   2  15  128.69    7.50
  -1  -2 -15  143.69    8.70
   1   2  15  123.69    8.20
  -1   2 -15  142.69    9.40
   1   2  15  149.69    8.60
  -1   2 -15  137.19    9.50
  -1  -2  15  125.99    6.40
   1   2  15  128.59    9.50
   1  -2 -15  132.19    6.60
  -1  -2  15  125.69    6.40
[truncated: 54,841 more chars]
